# Supplementary material for: Reduction of Metastasis via Epigenetic Modulation in a Murine Model of Metastatic Triple Negative Breast Cancer (TNBC)
Source: MDPI journal article supplement (doi:10.3390/cancers14071753), 2022-03-30
Supplement: s1 [file s1]

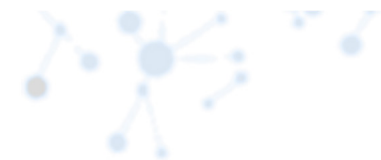

Analysis Name: Meta\_33 - 2021-08-17 12:24 PM

Analysis Creation Date: 2021-08-17

Build version: exported

Content version: 65367011 (Release Date: 2021-06-04)

### Experiment Metadata

| Name | Value |
|------|-------|
|------|-------|

### Analysis Settings

Reference set: Ingenuity Knowledge Base (Genes Only)

Relationship to include: Direct and Indirect

Includes Endogenous Chemicals

Optional Analyses: My Pathways My List

Filter Summary:

Consider only molecules and/or relationships where

(species = Rat OR Human OR Mouse) AND

(confidence = Experimentally Observed) AND

(mol. types = biologic drug OR canonical pathway OR chemical - endogenous mammalian OR chemical - endogenous non-mammalian OR chemical - kinase inhibitor OR chemical - other OR chemical - protease inhibitor OR chemical drug OR chemical reagent OR chemical toxicant OR complex OR cytokine OR disease OR enzyme OR function OR G-protein coupled receptor OR group OR growth factor OR ion channel OR

kinase OR ligand-dependent nuclear receptor OR mature microRNA OR microRNA OR other OR peptidase OR phosphatase OR transcription regulator OR translation regulator OR transmembrane receptor OR transporter) AND  
 (data sources = An Open Access Database of Genome-wide Association Results OR BIND OR BioGRID OR Catalogue Of Somatic Mutations In Cancer (COSMIC) OR Chemical Carcinogenesis Research Information System (CCRIS) OR Clinical Genome Resource (ClinGen) OR ClinicalTrials.gov OR ClinVar OR Cognition OR DIP OR DrugBank OR Gene Ontology (GO) OR GVK Biosciences OR Hazardous Substances Data Bank (HSDB) OR HumanCyc OR Ingenuity Expert Findings OR Ingenuity ExpertAssist Findings OR IntAct OR Interactome studies OR MIPS OR miRBase OR miRecords OR Mouse Genome Database (MGD) OR Obesity Gene Map Database OR Online Mendelian Inheritance in Man (OMIM) OR TarBase OR TargetScan Human)

## Top Canonical Pathways

| Name                                                           | p-value  | Overlap     |
|----------------------------------------------------------------|----------|-------------|
| <a href="#">Neuregulin Signaling</a>                           | 5.82E-04 | 2.6 % 3/117 |
| <a href="#">Dermatan Sulfate Biosynthesis (Late Stages)</a>    | 1.81E-03 | 4.4 % 2/45  |
| <a href="#">Chondroitin Sulfate Biosynthesis (Late Stages)</a> | 1.97E-03 | 4.3 % 2/47  |
| <a href="#">Chondroitin Sulfate Biosynthesis</a>               | 2.69E-03 | 3.6 % 2/55  |
| <a href="#">Dermatan Sulfate Biosynthesis</a>                  | 2.99E-03 | 3.4 % 2/58  |

## Top Upstream Regulators

### Upstream Regulators

| Name | p-value | Predicted Activation |
|------|---------|----------------------|
|------|---------|----------------------|

|                 |          |
|-----------------|----------|
| <b>mir-8</b>    | 8.66E-04 |
| <b>NDRG1</b>    | 1.15E-03 |
| <b>Flt1</b>     | 1.48E-03 |
| <b>BTG3-AS1</b> | 1.48E-03 |
| <b>CD38</b>     | 1.48E-03 |

### Causal Network

| Name         | p-value  | Predicted Activation |
|--------------|----------|----------------------|
| <b>GPI</b>   | 3.11E-04 |                      |
| <b>MAPK3</b> | 4.70E-04 |                      |
| <b>mir-8</b> | 8.66E-04 |                      |
| <b>NDRG1</b> | 1.15E-03 |                      |
| <b>CD19</b>  | 1.34E-03 |                      |

### Top Diseases and Bio Functions

#### Diseases and Disorders

| Name                                       | p-value range       | # Molecules |
|--------------------------------------------|---------------------|-------------|
| <b>Developmental Disorder</b>              | 1.53E-02 - 5.29E-05 | 10          |
| <b>Hereditary Disorder</b>                 | 2.35E-02 - 5.29E-05 | 8           |
| <b>Metabolic Disease</b>                   | 5.58E-03 - 5.29E-05 | 5           |
| <b>Organismal Injury and Abnormalities</b> | 2.35E-02 - 5.29E-05 | 33          |
| <b>Skeletal and Muscular Disorders</b>     | 1.39E-02 - 5.29E-05 | 9           |

**Molecular and Cellular Functions**

| Name                                     | p-value range       | # Molecules |
|------------------------------------------|---------------------|-------------|
| <b>Cellular Development</b>              | 2.41E-02 - 1.14E-05 | 8           |
| <b>Cellular Growth and Proliferation</b> | 2.41E-02 - 1.14E-05 | 9           |
| <b>Carbohydrate Metabolism</b>           | 1.80E-02 - 2.09E-05 | 7           |
| <b>Cell Death and Survival</b>           | 2.30E-02 - 8.48E-05 | 8           |
| <b>Cell Signaling</b>                    | 1.30E-02 - 1.24E-04 | 3           |

**Physiological System Development and Function**

| Name                                                  | p-value range       | # Molecules |
|-------------------------------------------------------|---------------------|-------------|
| <b>Cardiovascular System Development and Function</b> | 2.35E-02 - 1.14E-05 | 4           |
| <b>Embryonic Development</b>                          | 2.35E-02 - 1.14E-05 | 8           |
| <b>Organismal Development</b>                         | 2.35E-02 - 1.14E-05 | 10          |
| <b>Endocrine System Development and Function</b>      | 1.39E-02 - 1.97E-04 | 4           |
| <b>Organ Development</b>                              | 2.41E-02 - 9.17E-04 | 8           |

**Top Tox Functions****Assays: Clinical Chemistry and Hematology**

| Name                                            | p-value range       | # Molecules |
|-------------------------------------------------|---------------------|-------------|
| <b>Increased Levels of Alkaline Phosphatase</b> | 6.98E-03 - 6.98E-03 | 1           |
| <b>Increased Levels of Bilirubin</b>            | 2.08E-02 - 2.08E-02 | 1           |
| <b>Increased Levels of AST</b>                  | 2.63E-02 - 2.63E-02 | 1           |

### Cardiotoxicity

| Name                               | p-value range       | # Molecules |
|------------------------------------|---------------------|-------------|
| <b>Cardiac Necrosis/Cell Death</b> | 2.43E-01 - 1.40E-03 | 1           |
| <b>Cardiac Enlargement</b>         | 2.18E-01 - 5.58E-03 | 2           |
| <b>Cardiac Dysfunction</b>         | 4.25E-02 - 4.25E-02 | 1           |
| <b>Cardiac Damage</b>              | 5.45E-02 - 5.45E-02 | 1           |
| <b>Cardiac Arteriopathy</b>        | 6.16E-02 - 6.16E-02 | 2           |

### Hepatotoxicity

| Name                                        | p-value range       | # Molecules |
|---------------------------------------------|---------------------|-------------|
| <b>Liver Hyperplasia/Hyperproliferation</b> | 1.55E-01 - 1.04E-03 | 17          |
| <b>Dysfunction of liver</b>                 | 6.98E-03 - 6.98E-03 | 1           |
| <b>Hepatocellular carcinoma</b>             | 1.55E-01 - 1.53E-02 | 5           |
| <b>Liver Proliferation</b>                  | 4.38E-02 - 2.41E-02 | 2           |
| <b>Glutathione Depletion In Liver</b>       | 2.63E-02 - 2.63E-02 | 1           |

### Nephrotoxicity

| Name                             | p-value range       | # Molecules |
|----------------------------------|---------------------|-------------|
| <b>Kidney Failure</b>            | 5.58E-03 - 5.58E-03 | 1           |
| <b>Renal Necrosis/Cell Death</b> | 3.23E-01 - 9.69E-02 | 2           |
| <b>Renal Damage</b>              | 1.45E-01 - 1.22E-01 | 1           |
| <b>Renal Tubule Injury</b>       | 1.22E-01 - 1.22E-01 | 1           |
| <b>Renal Proliferation</b>       | 2.63E-01 - 2.63E-01 | 1           |

### Top Regulator Effect Networks

### Top Networks

| ID       | Associated Network Functions                                                              | Score |
|----------|-------------------------------------------------------------------------------------------|-------|
| <b>1</b> | Cellular Movement, Hematological System Development and Function, Immune Cell Trafficking | 23    |
| <b>2</b> | Inflammatory Response, Drug Metabolism, Endocrine System Development and Function         | 21    |
| <b>3</b> | Molecular Transport, Amino Acid Metabolism, Small Molecule Biochemistry                   | 3     |

|   |                                                         |   |
|---|---------------------------------------------------------|---|
| 4 | Cancer, Hematological Disease, Immunological Disease    | 3 |
| 5 | Cancer, Cell Death and Survival, Developmental Disorder | 3 |

### Top Tox Lists

| Name                                                        | p-value  | Overlap     |
|-------------------------------------------------------------|----------|-------------|
| <b>LPS/IL-1 Mediated Inhibition of RXR Function</b>         | 5.24E-03 | 1.2 % 3/253 |
| <b>LXR/RXR Activation</b>                                   | 1.28E-02 | 1.6 % 2/123 |
| <b>Persistent Renal Ischemia-Reperfusion Injury (Mouse)</b> | 4.12E-02 | 3.3 % 1/30  |
| <b>NF-B Signaling</b>                                       | 4.56E-02 | 0.5 % 3/574 |
| <b>Hepatic Stellate Cell Activation</b>                     | 4.78E-02 | 2.9 % 1/35  |

### Top My Lists

### Top My Pathways

### Top Analysis-Ready Molecules

**Expr Log Ratio**

| Molecules                | Expr. Value | Chart |
|--------------------------|-------------|-------|
| <a href="#">TMEM233</a>  | ↑ 3.021     |       |
| <a href="#">LYZ</a>      | ↑ 1.962     |       |
| <a href="#">LMO7</a>     | ↑ 0.698     |       |
| <a href="#">ENO3</a>     | ↑ 0.606     |       |
| <a href="#">C1orf159</a> | ↑ 0.577     |       |
| <a href="#">CLK1</a>     | ↑ 0.513     |       |
| <a href="#">RRNAD1</a>   | ↑ 0.484     |       |
| <a href="#">LRRC45</a>   | ↑ 0.459     |       |
| <a href="#">PRPF39</a>   | ↑ 0.447     |       |
| <a href="#">LUC7L3</a>   | ↑ 0.437     |       |

**Expr Log Ratio**

| Molecules               | Expr. Value | Chart |
|-------------------------|-------------|-------|
| <a href="#">IL1R2</a>   | ↓ -1.106    |       |
| <a href="#">LARS2</a>   | ↓ -0.822    |       |
| <a href="#">SMIM3</a>   | ↓ -0.735    |       |
| <a href="#">ATF3</a>    | ↓ -0.733    |       |
| <a href="#">TGFA</a>    | ↓ -0.727    |       |
| <a href="#">CHST11</a>  | ↓ -0.695    |       |
| <a href="#">PCDHB16</a> | ↓ -0.635    |       |
| <a href="#">B3GLCT</a>  | ↓ -0.619    |       |
| <a href="#">MAN1A1</a>  | ↓ -0.559    |       |
| <a href="#">LRRC8B</a>  | ↓ -0.553    |       |
