# Supplementary material for: Reduction of Metastasis via Epigenetic Modulation in a Murine Model of Metastatic Triple Negative Breast Cancer (TNBC)
Source: MDPI journal article supplement (doi:10.3390/cancers14071753), 2022-03-30
Supplement: s1 [file s1]

Assay Class: Eukaryote Total RNA Nano  
 Data Path: C:\...Eukaryote Total RNA Nano\_DE72902546\_2018-05-17\_12-45-00.xad

Created: 5/17/2018 12:44:59 PM  
 Modified: 5/17/2018 1:08:50 PM

**Electrophoresis File Run Summary**

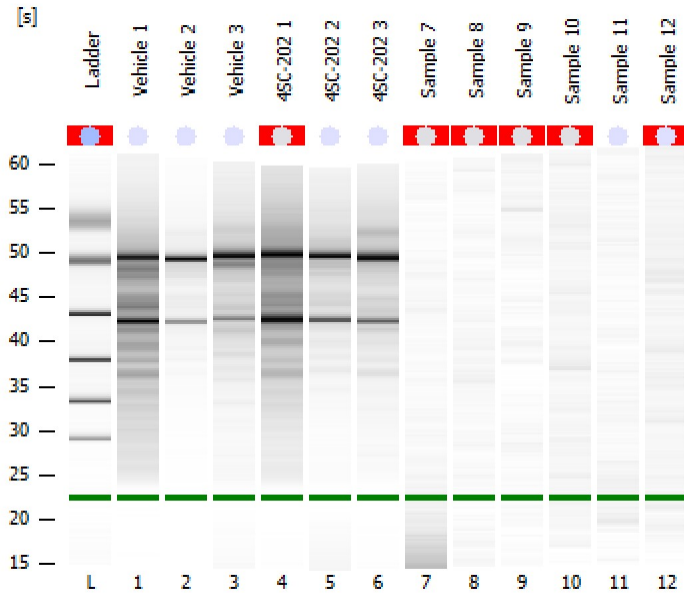

Instrument Information:

Instrument Name: DE72902546      Firmware: C.01.069  
 Serial#: DE72902546      Type: G2939A

Assay Information:

Assay Origin Path: C:\Program Files (x86)\Agilent\2100 bioanalyzer\2100 expert\assays\RNA\Eukaryote Total RNA Nano Series II.xsy

Assay Class: Eukaryote Total RNA Nano

Version: 2.6

Assay Comments: Total RNA Analysis ng sensitivity (Eukaryote)

© Copyright 2003 - 2009 Agilent Technologies, Inc.

Chip Information:

Chip Lot #:

Reagent Kit Lot #:

Chip Comments:

**Vehicle 1**

RIN: 4.30

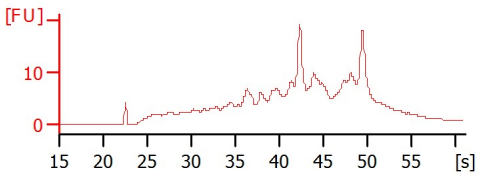

**Vehicle 2**

RIN: 8.80

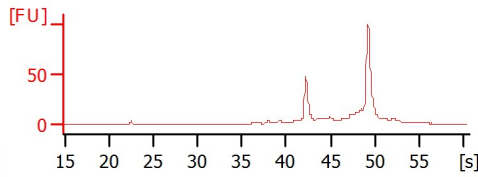

**Vehicle 3**

RIN: 5.70

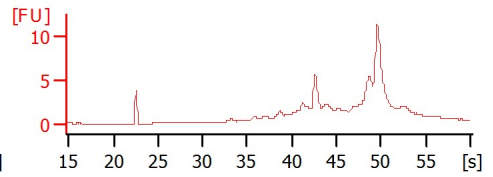

**4SC-202 1**

RIN N/A

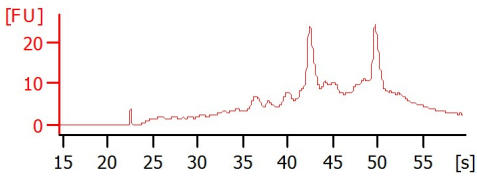

**4SC-202 2**

RIN: 8.90

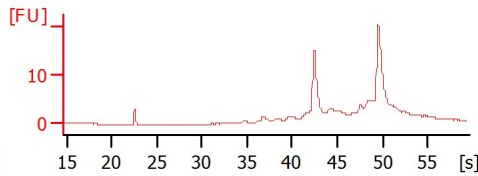

**4SC-202 3**

RIN: 8

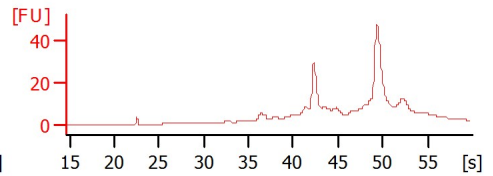

**Sample 7**

RIN N/A

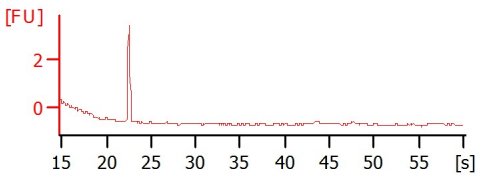

**Sample 8**

RIN N/A

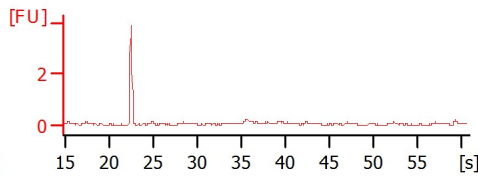

**Sample 9**

RIN N/A

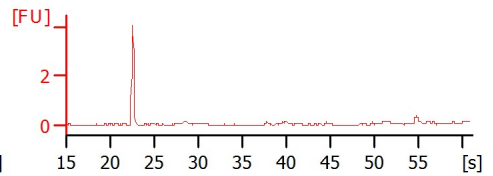

**Sample 10**

RIN N/A

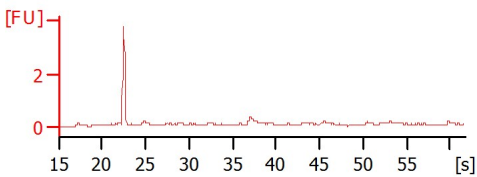

**Sample 11**

RIN: 1

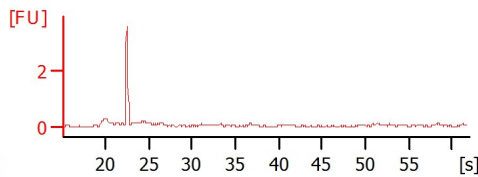

**Sample 12**

RIN: 1

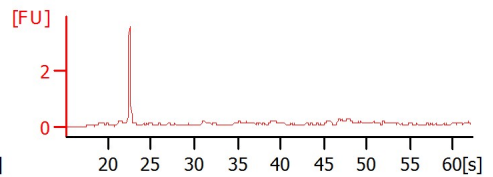

Assay Class: Eukaryote Total RNA Nano  
 Data Path: C:\...Eukaryote Total RNA Nano\_DE72902546\_2018-05-17\_12-45-00.xad

Created: 5/17/2018 12:44:59 PM  
 Modified: 5/17/2018 1:08:50 PM

**Electrophoresis File Run Summary (Chip Summary)**

| Sample Name | Sample Comment | Status | Result Label      | Result Color |
|-------------|----------------|--------|-------------------|--------------|
| Vehicle 1   |                | ✓      | RIN: 4.30         |              |
| Vehicle 2   |                | ✓      | RIN: 8.80         |              |
| Vehicle 3   |                | ✓      | RIN: 5.70         |              |
| 4SC-202 1   |                | ✓      | RIN N/A           |              |
| 4SC-202 2   |                | ✓      | RIN: 8.90         |              |
| 4SC-202 3   |                | ✓      | RIN:8             |              |
| Sample 7    |                | ✓      | RIN N/A           |              |
| Sample 8    |                | ✓      | RIN N/A           |              |
| Sample 9    |                | ✓      | RIN N/A           |              |
| Sample 10   |                | ✗      | RIN N/A           |              |
| Sample 11   |                | ✓      | RIN:1             |              |
| Sample 12   |                | ✗      | RIN:1             |              |
| Ladder      |                | ✗      | All Other Samples |              |

**Chip Lot #**

**Reagent Kit Lot #**

**Chip Comments :**

Assay Class: Eukaryote Total RNA Nano  
Data Path: C:\...Eukaryote Total RNA Nano\_DE72902546\_2018-05-17\_12-45-00.xad

Created: 5/17/2018 12:44:59 PM  
Modified: 5/17/2018 1:08:50 PM

## Electrophoresis Assay Details

### General Analysis Settings

Number of Available Sample and Ladder Wells (Max.) : 13  
Minimum Visible Range [s] : 17  
Maximum Visible Range [s] : 70  
Start Analysis Time Range [s] : 19  
End Analysis Time Range [s] : 69  
Ladder Concentration [ng/μl] : 150  
Lower Marker Concentration [ng/μl] : 0  
Upper Marker Concentration [ng/μl] : 0  
Used Lower Marker for Quantitation  
Standard Curve Fit is Logarithmic  
Show Data Aligned to Lower Marker

### Integrator Settings

Integration Start Time [s] : 19  
Integration End Time [s] : 69  
Slope Threshold : 0.6  
Height Threshold [FU] : 0.5  
Area Threshold : 0.2  
Width Threshold [s] : 0.5  
Baseline Plateau [s] : 6

### Filter Settings

Filter Width [s] : 0.5  
Polynomial Order : 4

### Ladder

| Ladder Peak | Size |
|-------------|------|
| 1           | 25   |
| 2           | 200  |
| 3           | 500  |
| 4           | 1000 |
| 5           | 2000 |
| 6           | 4000 |

Assay Class: Eukaryote Total RNA Nano  
 Data Path: C:\...Eukaryote Total RNA Nano\_DE72902546\_2018-05-17\_12-45-00.xad

Created: 5/17/2018 12:44:59 PM  
 Modified: 5/17/2018 1:08:50 PM

**Electropherogram Summary**

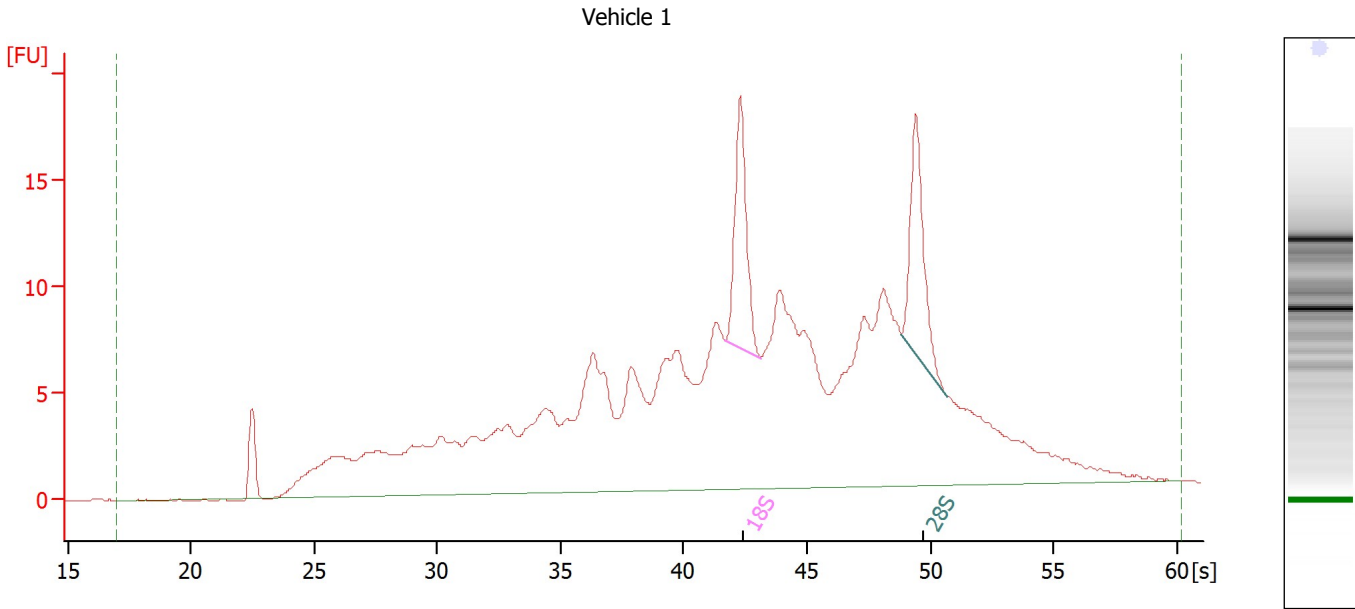

**Overall Results for sample 1 : Vehicle 1**

|                         |           |                             |                                                                                                                             |
|-------------------------|-----------|-----------------------------|-----------------------------------------------------------------------------------------------------------------------------|
| RNA Area:               | 358.2     | RNA Integrity Number (RIN): | 4.3 (B.02.08)                                                                                                               |
| RNA Concentration:      | 881 ng/μl | Result Flagging Color:      | <span style="background-color: #ccccff; border: 1px solid black; display: inline-block; width: 20px; height: 10px;"></span> |
| rRNA Ratio [28s / 18s]: | 0.9       | Result Flagging Label:      | RIN: 4.30                                                                                                                   |

**Fragment table for sample 1 : Vehicle 1**

| Name | Start Time [s] | End Time [s] | Area | % of total Area |
|------|----------------|--------------|------|-----------------|
| 18S  | 41.69          | 43.13        | 14.8 | 4.1             |
| 28S  | 48.84          | 50.67        | 14.0 | 3.9             |

Assay Class: Eukaryote Total RNA Nano  
 Data Path: C:\...Eukaryote Total RNA Nano\_DE72902546\_2018-05-17\_12-45-00.xad

Created: 5/17/2018 12:44:59 PM  
 Modified: 5/17/2018 1:08:50 PM

**Electropherogram Summary Continued ...**

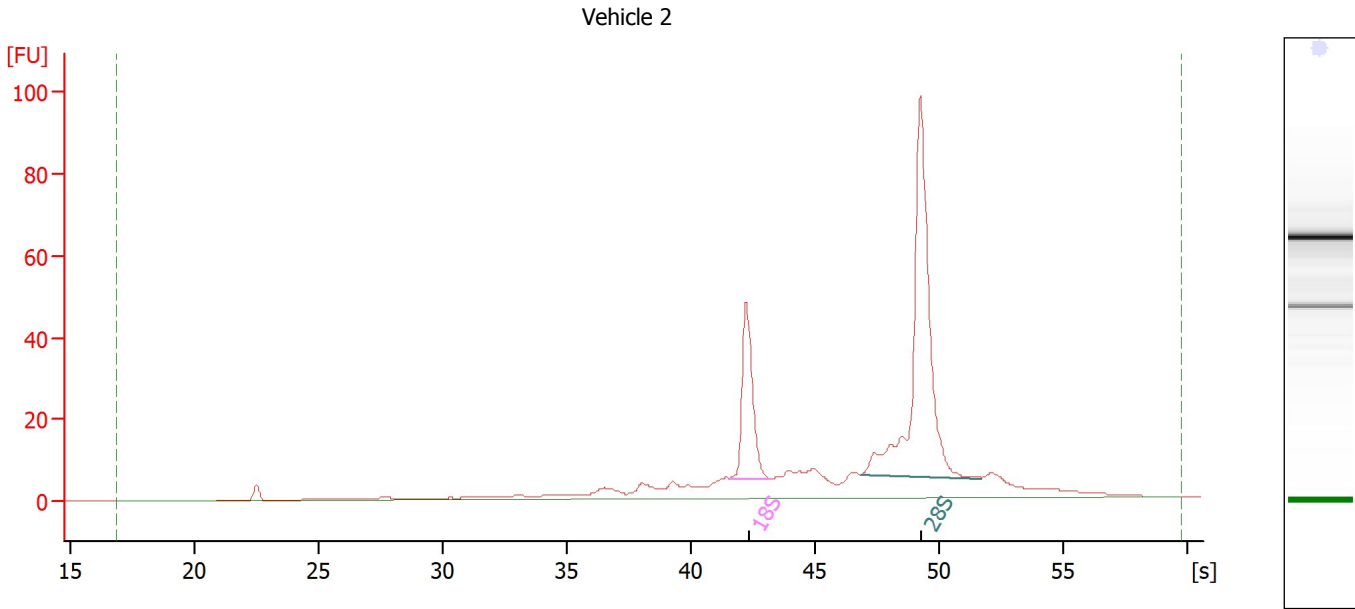

**Overall Results for sample 2 : Vehicle 2**

|                         |           |                             |                                                                                                                             |
|-------------------------|-----------|-----------------------------|-----------------------------------------------------------------------------------------------------------------------------|
| RNA Area:               | 389.5     | RNA Integrity Number (RIN): | 8.8 (B.02.08)                                                                                                               |
| RNA Concentration:      | 958 ng/μl | Result Flagging Color:      | <span style="background-color: #ccccff; border: 1px solid black; display: inline-block; width: 20px; height: 10px;"></span> |
| rRNA Ratio [28s / 18s]: | 2.9       | Result Flagging Label:      | RIN: 8.80                                                                                                                   |

**Fragment table for sample 2 : Vehicle 2**

| Name | Start Time [s] | End Time [s] | Area  | % of total Area |
|------|----------------|--------------|-------|-----------------|
| 18S  | 41.54          | 43.23        | 48.6  | 12.5            |
| 28S  | 46.82          | 51.71        | 140.8 | 36.2            |

Assay Class: Eukaryote Total RNA Nano  
 Data Path: C:\...Eukaryote Total RNA Nano\_DE72902546\_2018-05-17\_12-45-00.xad

Created: 5/17/2018 12:44:59 PM  
 Modified: 5/17/2018 1:08:50 PM

**Electropherogram Summary Continued ...**

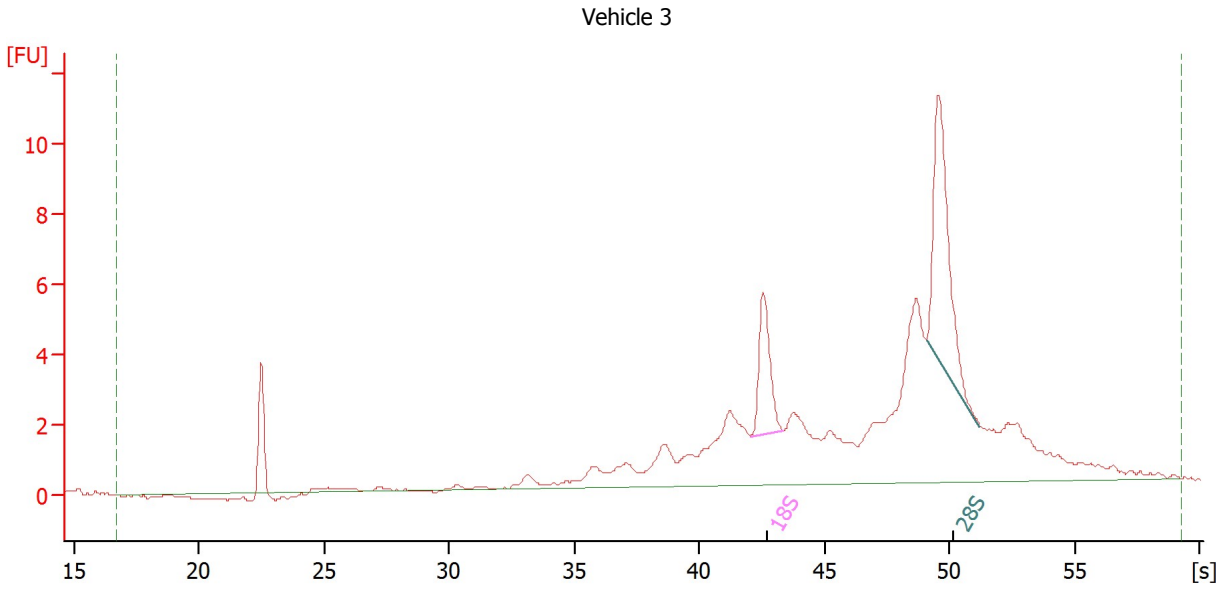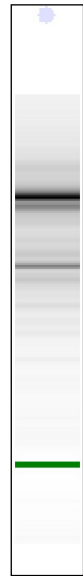

**Overall Results for sample 3 : Vehicle 3**

|                         |           |                             |                                                                                                                             |
|-------------------------|-----------|-----------------------------|-----------------------------------------------------------------------------------------------------------------------------|
| RNA Area:               | 85.1      | RNA Integrity Number (RIN): | 5.7 (B.02.08)                                                                                                               |
| RNA Concentration:      | 209 ng/μl | Result Flagging Color:      | <span style="background-color: #ccccff; border: 1px solid black; display: inline-block; width: 20px; height: 10px;"></span> |
| rRNA Ratio [28s / 18s]: | 2.2       | Result Flagging Label:      | RIN: 5.70                                                                                                                   |

**Fragment table for sample 3 : Vehicle 3**

| Name | Start Time [s] | End Time [s] | Area | % of total Area |
|------|----------------|--------------|------|-----------------|
| 18S  | 42.04          | 43.37        | 4.7  | 5.5             |
| 28S  | 49.08          | 51.23        | 10.5 | 12.3            |

Assay Class: Eukaryote Total RNA Nano  
 Data Path: C:\...Eukaryote Total RNA Nano\_DE72902546\_2018-05-17\_12-45-00.xad

Created: 5/17/2018 12:44:59 PM  
 Modified: 5/17/2018 1:08:50 PM

**Electropherogram Summary Continued ...**

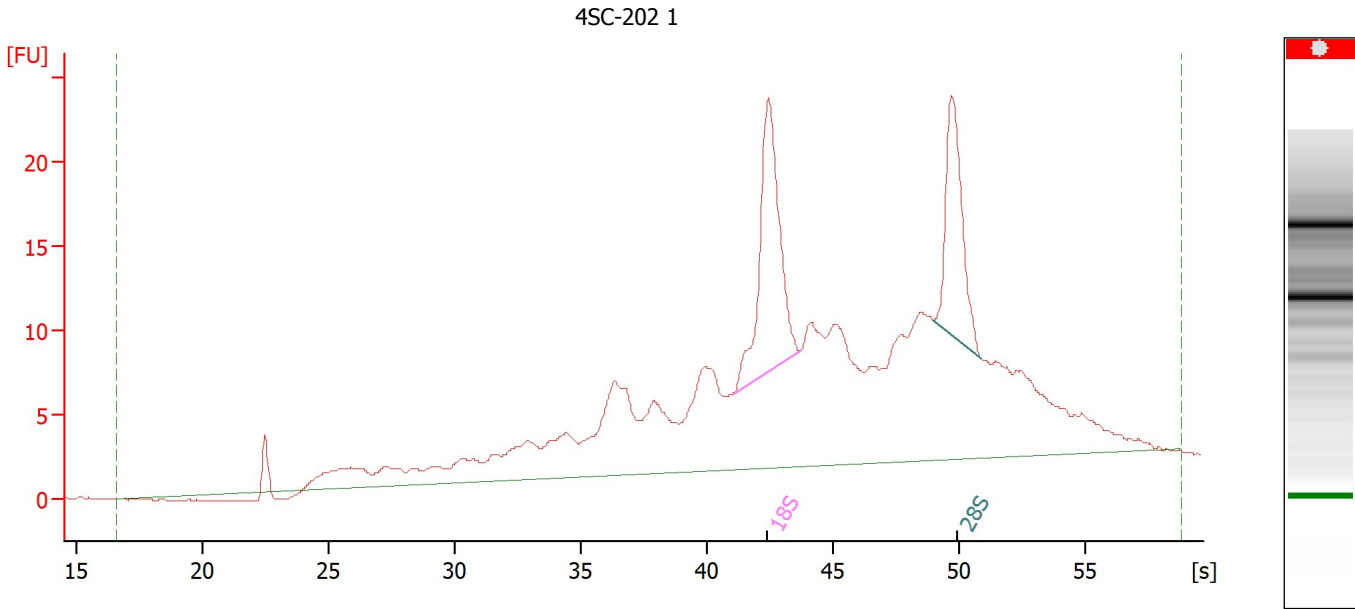

**Overall Results for sample 4 : 4SC-202 1**

|                         |           |                             |                                                                                                                             |
|-------------------------|-----------|-----------------------------|-----------------------------------------------------------------------------------------------------------------------------|
| RNA Area:               | 352.7     | RNA Integrity Number (RIN): | N/A (B.02.08)                                                                                                               |
| RNA Concentration:      | 867 ng/μl | Result Flagging Color:      | <span style="background-color: #cccccc; border: 1px solid black; display: inline-block; width: 20px; height: 10px;"></span> |
| rRNA Ratio [28s / 18s]: | 0.6       | Result Flagging Label:      | RIN N/A                                                                                                                     |

**Fragment table for sample 4 : 4SC-202 1**

| Name | Start Time [s] | End Time [s] | Area | % of total Area |
|------|----------------|--------------|------|-----------------|
| 18S  | 41.04          | 43.72        | 34.3 | 9.7             |
| 28S  | 49.01          | 50.88        | 21.4 | 6.1             |

Assay Class: Eukaryote Total RNA Nano  
 Data Path: C:\...Eukaryote Total RNA Nano\_DE72902546\_2018-05-17\_12-45-00.xad

Created: 5/17/2018 12:44:59 PM  
 Modified: 5/17/2018 1:08:50 PM

**Electropherogram Summary Continued ...**

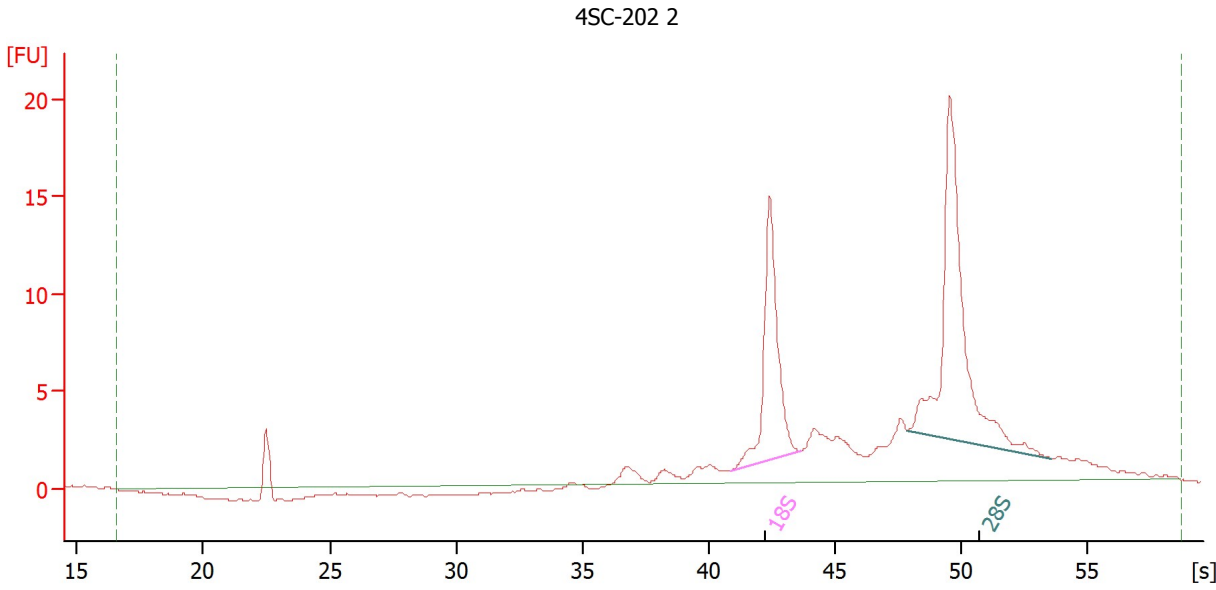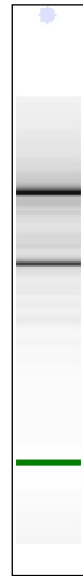

**Overall Results for sample 5 : 4SC-202 2**

|                         |           |                             |                                                                                                                             |
|-------------------------|-----------|-----------------------------|-----------------------------------------------------------------------------------------------------------------------------|
| RNA Area:               | 112.0     | RNA Integrity Number (RIN): | 8.9 (B.02.08)                                                                                                               |
| RNA Concentration:      | 275 ng/μl | Result Flagging Color:      | <span style="background-color: #ccccff; border: 1px solid black; display: inline-block; width: 20px; height: 10px;"></span> |
| rRNA Ratio [28s / 18s]: | 1.7       | Result Flagging Label:      | RIN: 8.90                                                                                                                   |

**Fragment table for sample 5 : 4SC-202 2**

| Name | Start Time [s] | End Time [s] | Area | % of total Area |
|------|----------------|--------------|------|-----------------|
| 18S  | 40.92          | 43.64        | 19.7 | 17.6            |
| 28S  | 47.89          | 53.59        | 32.5 | 29.1            |



Assay Class: Eukaryote Total RNA Nano  
 Data Path: C:\...Eukaryote Total RNA Nano\_DE72902546\_2018-05-17\_12-45-00.xad

Created: 5/17/2018 12:44:59 PM  
 Modified: 5/17/2018 1:08:50 PM

**Electropherogram Summary Continued ...**

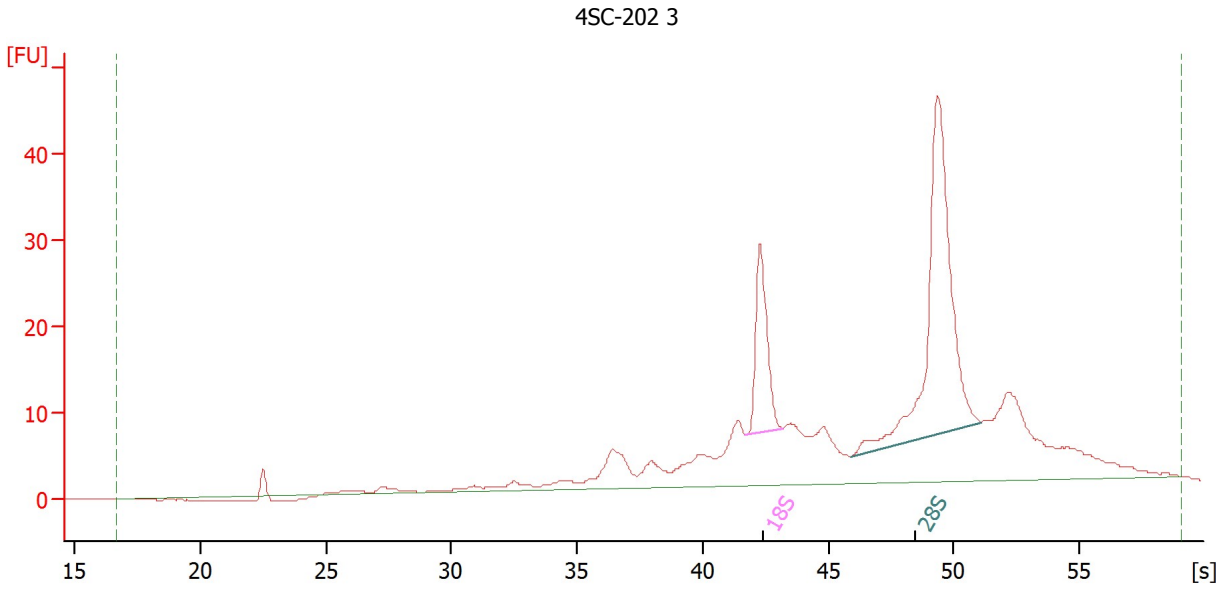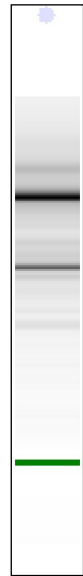

**Overall Results for sample 6 : 4SC-202 3**

|                         |           |                             |                                                                                                                             |
|-------------------------|-----------|-----------------------------|-----------------------------------------------------------------------------------------------------------------------------|
| RNA Area:               | 332.6     | RNA Integrity Number (RIN): | 8 (B.02.08)                                                                                                                 |
| RNA Concentration:      | 818 ng/μl | Result Flagging Color:      | <span style="background-color: #ccccff; border: 1px solid black; display: inline-block; width: 20px; height: 10px;"></span> |
| rRNA Ratio [28s / 18s]: | 3.0       | Result Flagging Label:      | RIN:8                                                                                                                       |

**Fragment table for sample 6 : 4SC-202 3**

| Name | Start Time [s] | End Time [s] | Area | % of total Area |
|------|----------------|--------------|------|-----------------|
| 18S  | 41.71          | 43.16        | 26.9 | 8.1             |
| 28S  | 45.90          | 51.07        | 80.9 | 24.3            |

Assay Class: Eukaryote Total RNA Nano  
 Data Path: C:\...Eukaryote Total RNA Nano\_DE72902546\_2018-05-17\_12-45-00.xad

Created: 5/17/2018 12:44:59 PM  
 Modified: 5/17/2018 1:08:50 PM

**Electropherogram Summary Continued ...**

Sample 7

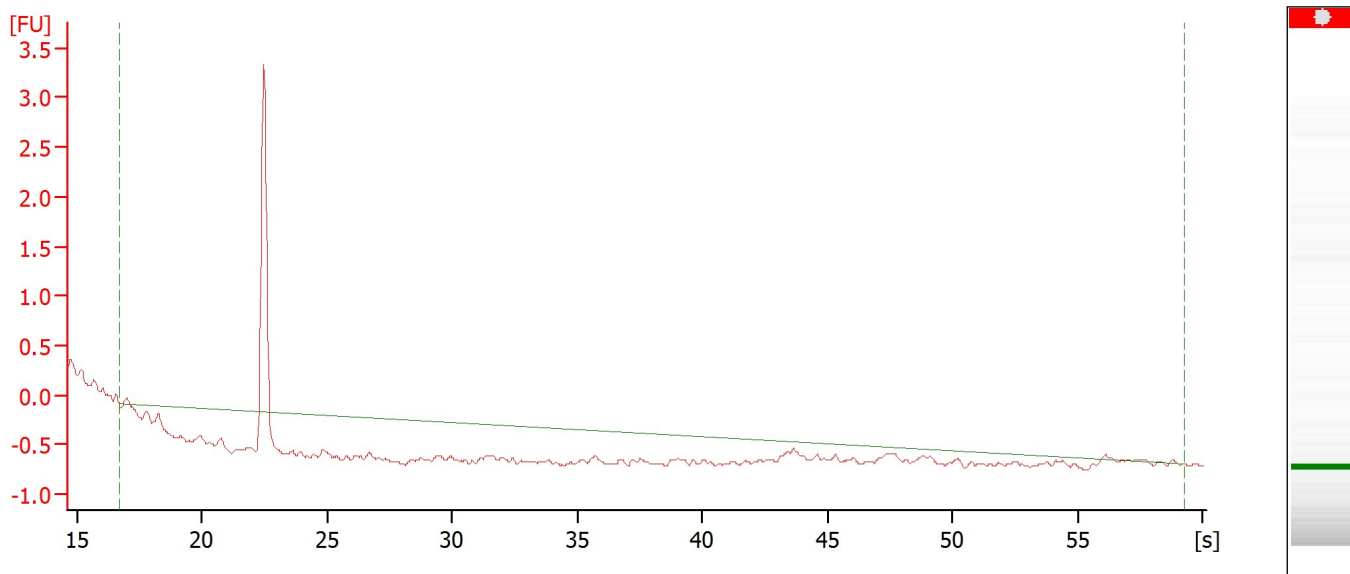

**Overall Results for sample 7 : Sample 7**

|                         |         |                             |                                                                                                                             |
|-------------------------|---------|-----------------------------|-----------------------------------------------------------------------------------------------------------------------------|
| RNA Area:               | 0.1     | RNA Integrity Number (RIN): | N/A (B.02.08)                                                                                                               |
| RNA Concentration:      | 0 ng/μl | Result Flagging Color:      | <span style="background-color: #cccccc; border: 1px solid black; display: inline-block; width: 20px; height: 10px;"></span> |
| rRNA Ratio [28s / 18s]: | 0.0     | Result Flagging Label:      | RIN N/A                                                                                                                     |

Assay Class: Eukaryote Total RNA Nano  
Data Path: C:\...Eukaryote Total RNA Nano\_DE72902546\_2018-05-17\_12-45-00.xad

Created: 5/17/2018 12:44:59 PM  
Modified: 5/17/2018 1:08:50 PM

**Electropherogram Summary Continued ...**

Sample 8

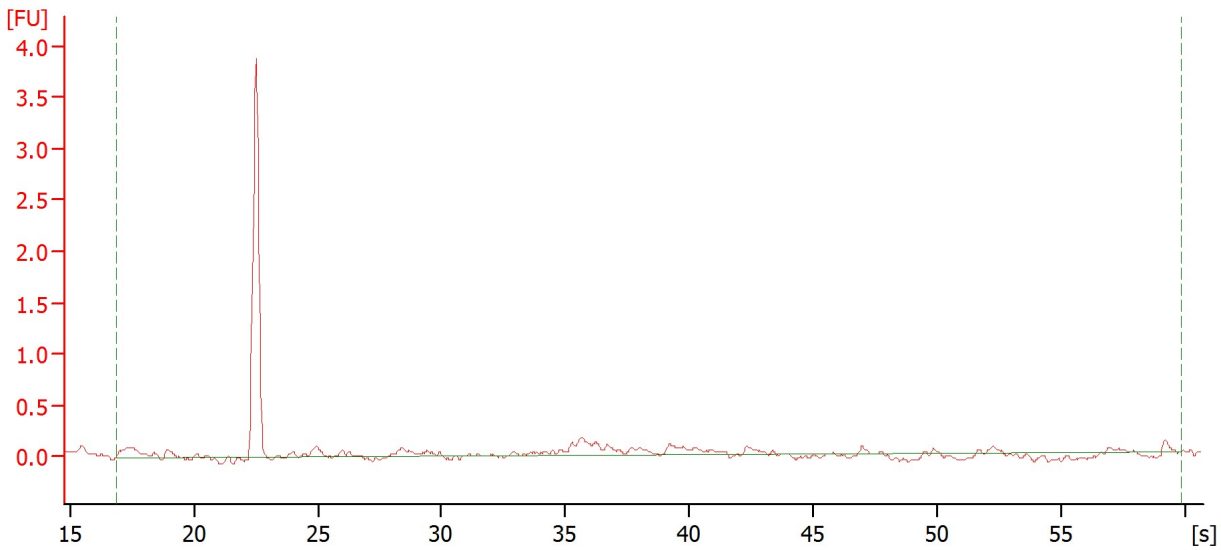

**Overall Results for sample 8 : Sample 8**

|                         |         |                             |                                                                                                                             |
|-------------------------|---------|-----------------------------|-----------------------------------------------------------------------------------------------------------------------------|
| RNA Area:               | 2.6     | RNA Integrity Number (RIN): | N/A (B.02.08)                                                                                                               |
| RNA Concentration:      | 6 ng/μl | Result Flagging Color:      | <span style="background-color: #cccccc; border: 1px solid black; display: inline-block; width: 20px; height: 10px;"></span> |
| rRNA Ratio [28s / 18s]: | 0.0     | Result Flagging Label:      | RIN N/A                                                                                                                     |

Assay Class: Eukaryote Total RNA Nano  
 Data Path: C:\...Eukaryote Total RNA Nano\_DE72902546\_2018-05-17\_12-45-00.xad

Created: 5/17/2018 12:44:59 PM  
 Modified: 5/17/2018 1:08:50 PM

**Electropherogram Summary Continued ...**

Sample 9

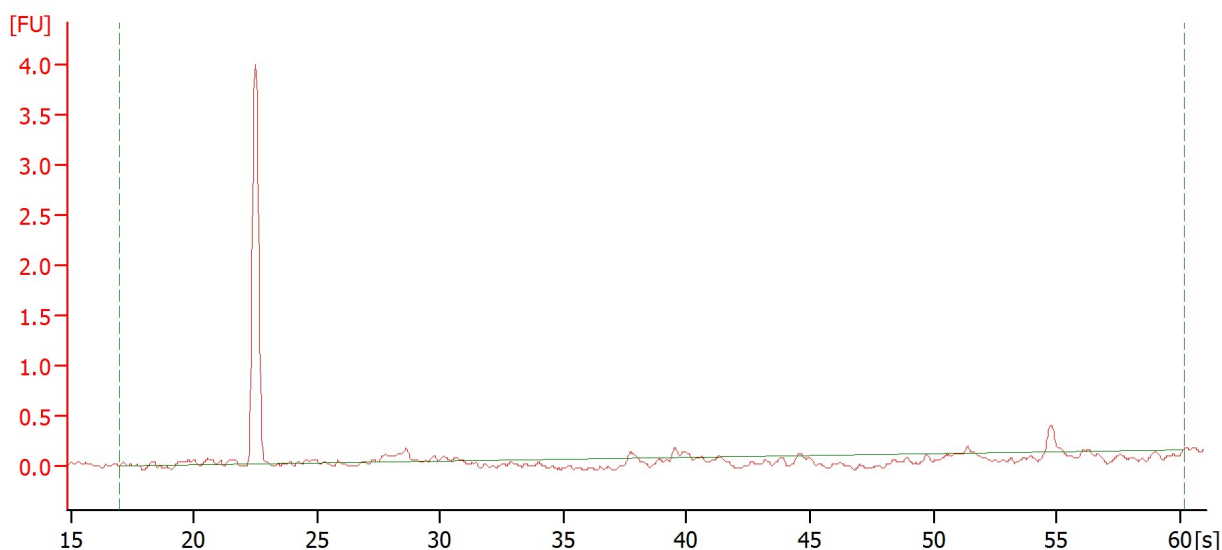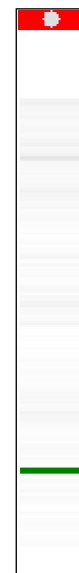

**Overall Results for sample 9 : Sample 9**

|                         |         |                             |                                                                                                                             |
|-------------------------|---------|-----------------------------|-----------------------------------------------------------------------------------------------------------------------------|
| RNA Area:               | 1.4     | RNA Integrity Number (RIN): | N/A (B.02.08)                                                                                                               |
| RNA Concentration:      | 4 ng/μl | Result Flagging Color:      | <span style="background-color: #cccccc; border: 1px solid black; display: inline-block; width: 20px; height: 10px;"></span> |
| rRNA Ratio [28s / 18s]: | 0.0     | Result Flagging Label:      | RIN N/A                                                                                                                     |

Assay Class: Eukaryote Total RNA Nano  
 Data Path: C:\...Eukaryote Total RNA Nano\_DE72902546\_2018-05-17\_12-45-00.xad

Created: 5/17/2018 12:44:59 PM  
 Modified: 5/17/2018 1:08:50 PM

**Electropherogram Summary Continued ...**

Sample 10

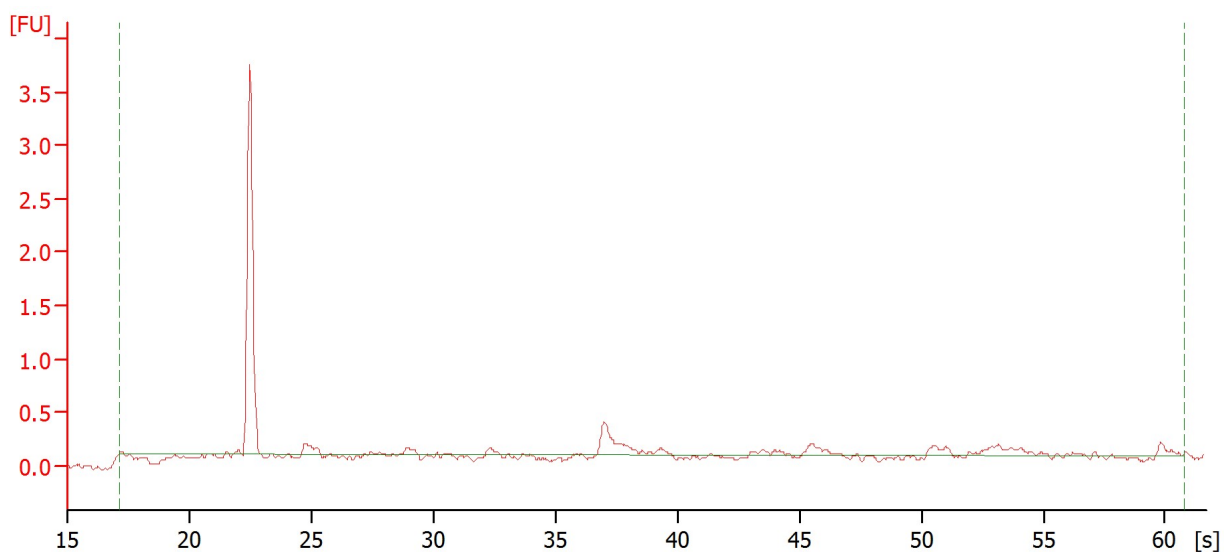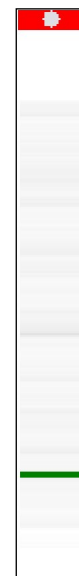

**Overall Results for sample 10 : Sample 10**

|                         |         |                             |                                                                                                                             |
|-------------------------|---------|-----------------------------|-----------------------------------------------------------------------------------------------------------------------------|
| RNA Area:               | 1.8     | RNA Integrity Number (RIN): | N/A (B.02.08)                                                                                                               |
| RNA Concentration:      | 4 ng/μl | Result Flagging Color:      | <span style="background-color: #cccccc; border: 1px solid black; display: inline-block; width: 20px; height: 10px;"></span> |
| rRNA Ratio [28s / 18s]: | 0.0     | Result Flagging Label:      | RIN N/A                                                                                                                     |

Assay Class: Eukaryote Total RNA Nano  
 Data Path: C:\...Eukaryote Total RNA Nano\_DE72902546\_2018-05-17\_12-45-00.xad

Created: 5/17/2018 12:44:59 PM  
 Modified: 5/17/2018 1:08:50 PM

**Electropherogram Summary Continued ...**

Sample 11

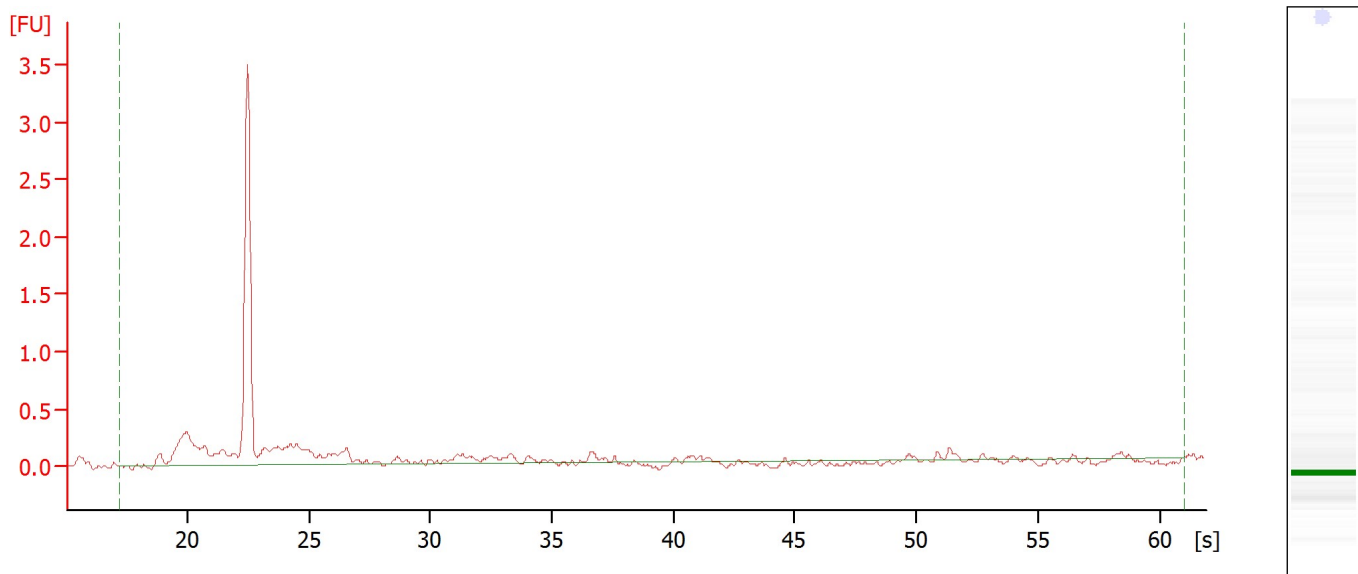

**Overall Results for sample 11 : Sample 11**

|                         |          |                             |                                                                                                                             |
|-------------------------|----------|-----------------------------|-----------------------------------------------------------------------------------------------------------------------------|
| RNA Area:               | 5.4      | RNA Integrity Number (RIN): | 1 (B.02.08)                                                                                                                 |
| RNA Concentration:      | 13 ng/μl | Result Flagging Color:      | <span style="background-color: #ccccff; border: 1px solid black; display: inline-block; width: 20px; height: 10px;"></span> |
| rRNA Ratio [28s / 18s]: | 0.0      | Result Flagging Label:      | RIN:1                                                                                                                       |

Assay Class: Eukaryote Total RNA Nano  
Data Path: C:\...Eukaryote Total RNA Nano\_DE72902546\_2018-05-17\_12-45-00.xad

Created: 5/17/2018 12:44:59 PM  
Modified: 5/17/2018 1:08:50 PM

**Electropherogram Summary Continued ...**

Sample 12

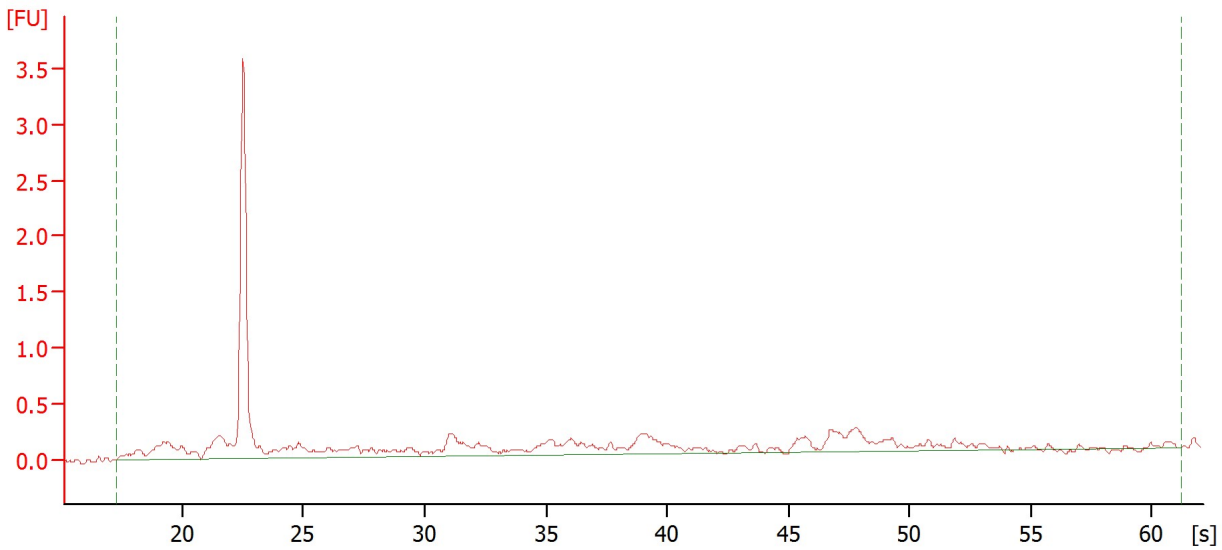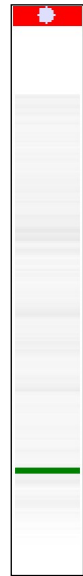

**Overall Results for sample 12 : Sample 12**

|                         |          |                             |                                                                                                                             |
|-------------------------|----------|-----------------------------|-----------------------------------------------------------------------------------------------------------------------------|
| RNA Area:               | 8.4      | RNA Integrity Number (RIN): | 1 (B.02.08)                                                                                                                 |
| RNA Concentration:      | 21 ng/μl | Result Flagging Color:      | <span style="background-color: #ccccff; border: 1px solid black; display: inline-block; width: 20px; height: 10px;"></span> |
| rRNA Ratio [28s / 18s]: | 0.0      | Result Flagging Label:      | RIN:1                                                                                                                       |

Assay Class: Eukaryote Total RNA Nano  
Data Path: C:\...Eukaryote Total RNA Nano\_DE72902546\_2019-11-07\_15-38-37.xad

Created: 11/7/2019 3:38:37 PM  
Modified: 11/7/2019 4:02:30 PM

Electrophoresis File Run Summary

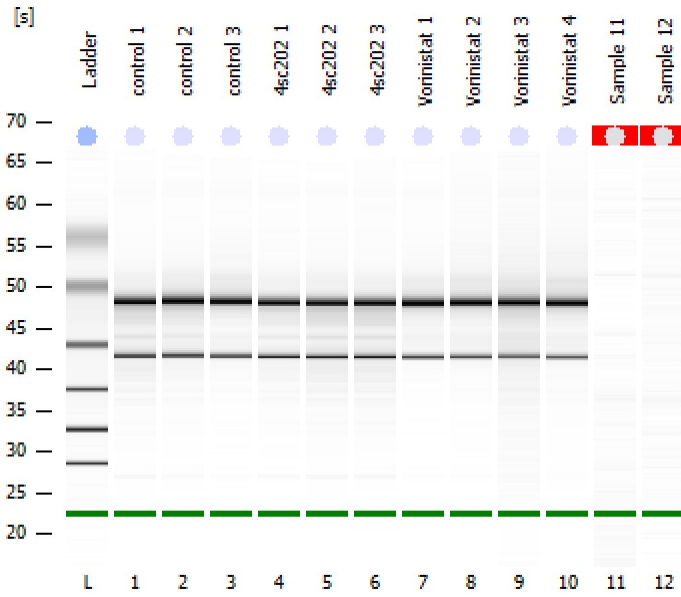

Instrument Information:

Instrument Name: DE72902546      Firmware: C.01.069  
Serial#: DE72902546      Type: G2939A

Assay Information:

Assay Origin Path: C:\Program Files (x86)\Agilent\2100 bioanalyzer\2100 expert\assays\RNA\Eukaryote Total RNA Nano Series II.xsy  
Assay Class: Eukaryote Total RNA Nano  
Version: 2.6  
Assay Comments: Total RNA Analysis ng sensitivity (Eukaryote)  
© Copyright 2003 - 2009 Agilent Technologies, Inc.

Chip Information:

Chip Lot #:      Reagent Kit Lot #:      Chip Comments:

**control 1**  
RIN: 9.40

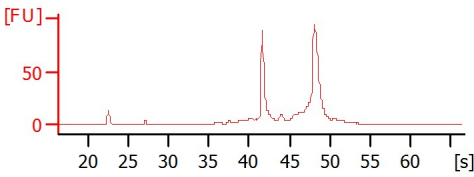

**control 2**  
RIN: 9.90

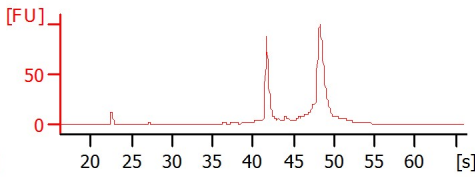

**control 3**  
RIN: 10

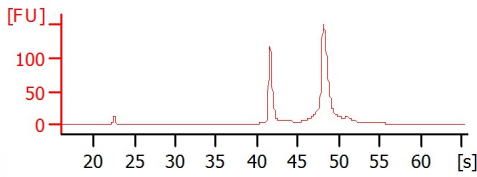

**4sc202 1**  
RIN: 9.50

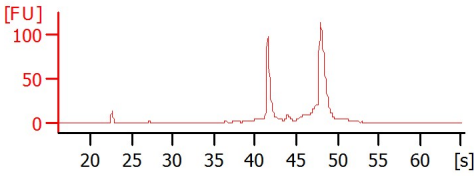

**4sc202 2**  
RIN: 9.10

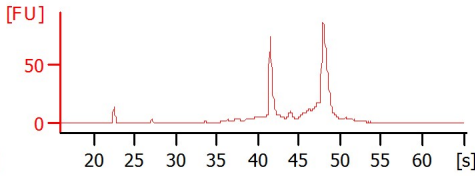

**4sc202 3**  
RIN: 9.10

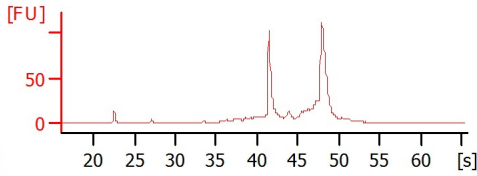

**Vorinostat 1**  
RIN: 10

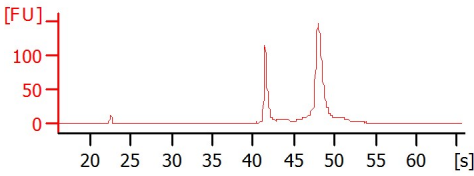

**Vorinostat 2**  
RIN: 10

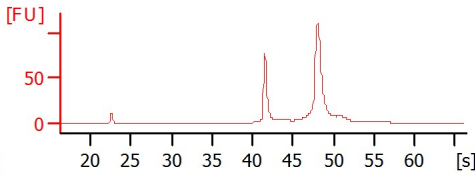

**Vorinostat 3**  
RIN: 9.10

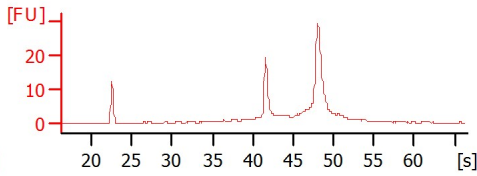

**Vorinostat 4**  
RIN: 10

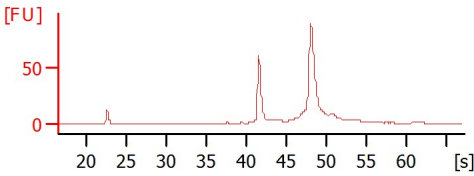

**Sample 11**  
RIN N/A

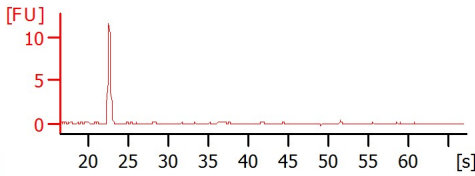

**Sample 12**  
RIN N/A

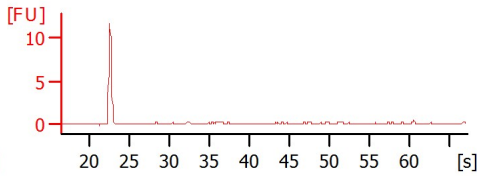



Assay Class: Eukaryote Total RNA Nano  
 Data Path: C:\...Eukaryote Total RNA Nano\_DE72902546\_2019-11-07\_15-38-37.xad

Created: 11/7/2019 3:38:37 PM  
 Modified: 11/7/2019 4:02:30 PM

**Electrophoresis File Run Summary (Chip Summary)**

| Sample Name  | Sample Comment | Status | Result Label      | Result Color |
|--------------|----------------|--------|-------------------|--------------|
| control 1    |                | ✓      | RIN: 9.40         |              |
| control 2    |                | ✓      | RIN: 9.90         |              |
| control 3    |                | ✓      | RIN:10            |              |
| 4sc202 1     |                | ✓      | RIN: 9.50         |              |
| 4sc202 2     |                | ✓      | RIN: 9.10         |              |
| 4sc202 3     |                | ✓      | RIN: 9.10         |              |
| Vorinistat 1 |                | ✓      | RIN:10            |              |
| Vorinistat 2 |                | ✓      | RIN:10            |              |
| Vorinistat 3 |                | ✓      | RIN: 9.10         |              |
| Vorinistat 4 |                | ✓      | RIN:10            |              |
| Sample 11    |                | ✓      | RIN N/A           |              |
| Sample 12    |                | ✓      | RIN N/A           |              |
| Ladder       |                | ✓      | All Other Samples |              |

**Chip Lot #**

**Reagent Kit Lot #**

**Chip Comments :**

Assay Class: Eukaryote Total RNA Nano  
Data Path: C:\...Eukaryote Total RNA Nano\_DE72902546\_2019-11-07\_15-38-37.xad

Created: 11/7/2019 3:38:37 PM  
Modified: 11/7/2019 4:02:30 PM

## Electrophoresis Assay Details

### General Analysis Settings

Number of Available Sample and Ladder Wells (Max.) : 13  
Minimum Visible Range [s] : 17  
Maximum Visible Range [s] : 70  
Start Analysis Time Range [s] : 19  
End Analysis Time Range [s] : 69  
Ladder Concentration [ng/ $\mu$ l] : 150  
Lower Marker Concentration [ng/ $\mu$ l] : 0  
Upper Marker Concentration [ng/ $\mu$ l] : 0  
Used Lower Marker for Quantitation  
Standard Curve Fit is Logarithmic  
Show Data Aligned to Lower Marker

### Integrator Settings

Integration Start Time [s] : 19  
Integration End Time [s] : 69  
Slope Threshold : 0.6  
Height Threshold [FU] : 0.5  
Area Threshold : 0.2  
Width Threshold [s] : 0.5  
Baseline Plateau [s] : 6

### Filter Settings

Filter Width [s] : 0.5  
Polynomial Order : 4

### Ladder

| Ladder Peak | Size |
|-------------|------|
| 1           | 25   |
| 2           | 200  |
| 3           | 500  |
| 4           | 1000 |
| 5           | 2000 |
| 6           | 4000 |

Assay Class: Eukaryote Total RNA Nano  
 Data Path: C:\...Eukaryote Total RNA Nano\_DE72902546\_2019-11-07\_15-38-37.xad

Created: 11/7/2019 3:38:37 PM  
 Modified: 11/7/2019 4:02:30 PM

**Electropherogram Summary**

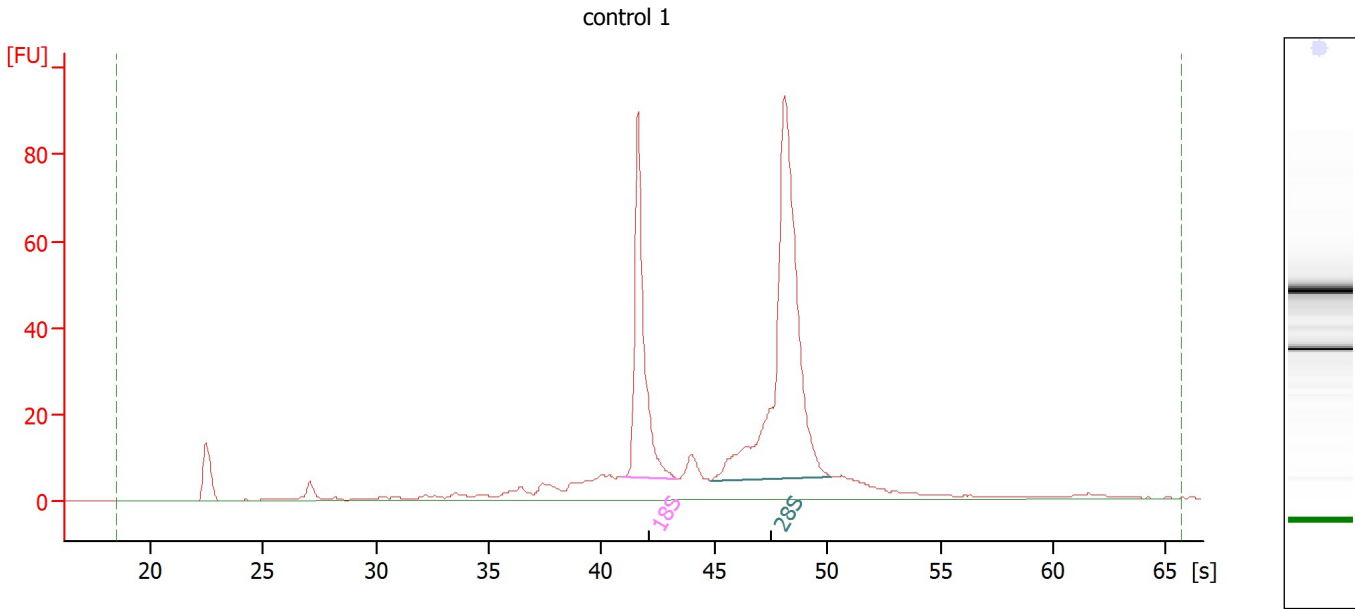

**Overall Results for sample 1 : control 1**

|                         |           |                             |                                                                                                                             |
|-------------------------|-----------|-----------------------------|-----------------------------------------------------------------------------------------------------------------------------|
| RNA Area:               | 505.2     | RNA Integrity Number (RIN): | 9.4 (B.02.08)                                                                                                               |
| RNA Concentration:      | 391 ng/μl | Result Flagging Color:      | <span style="background-color: #ccccff; border: 1px solid black; display: inline-block; width: 20px; height: 10px;"></span> |
| rRNA Ratio [28s / 18s]: | 2.2       | Result Flagging Label:      | RIN: 9.40                                                                                                                   |

**Fragment table for sample 1 : control 1**

| Name | Start Time [s] | End Time [s] | Area  | % of total Area |
|------|----------------|--------------|-------|-----------------|
| 18S  | 40.96          | 43.34        | 94.7  | 18.7            |
| 28S  | 44.86          | 50.18        | 204.6 | 40.5            |

Assay Class: Eukaryote Total RNA Nano  
 Data Path: C:\...Eukaryote Total RNA Nano\_DE72902546\_2019-11-07\_15-38-37.xad

Created: 11/7/2019 3:38:37 PM  
 Modified: 11/7/2019 4:02:30 PM

**Electropherogram Summary Continued ...**

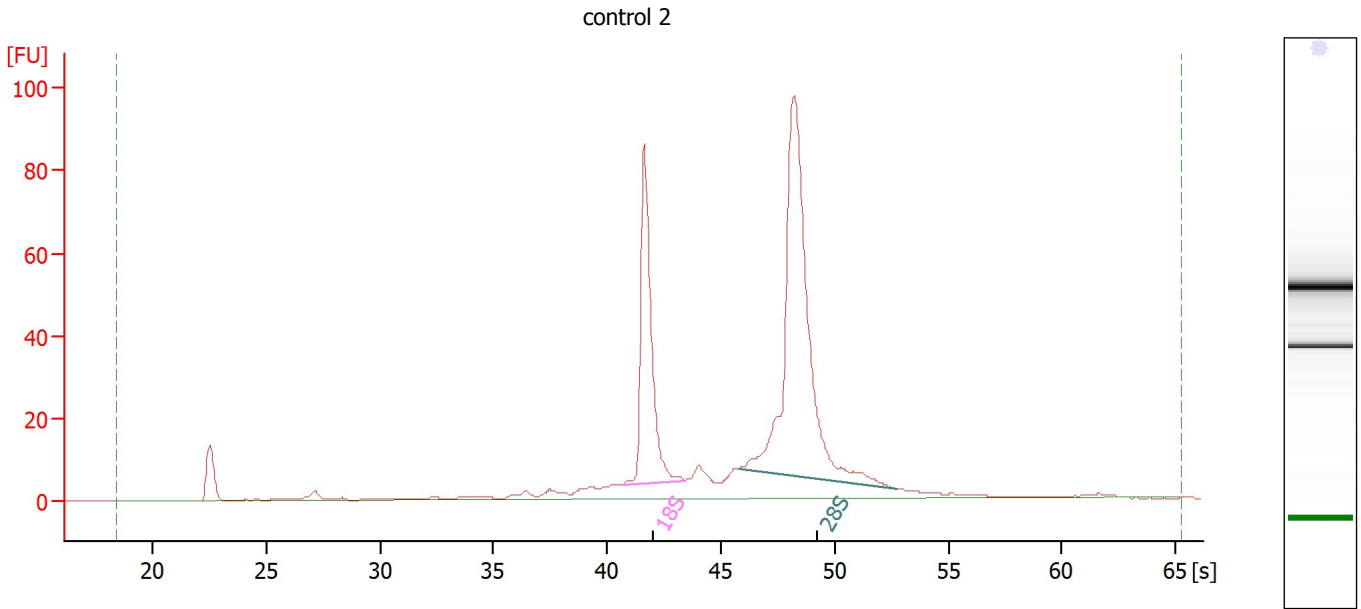

**Overall Results for sample 2 : control 2**

|                         |           |                             |                                                                                                                             |
|-------------------------|-----------|-----------------------------|-----------------------------------------------------------------------------------------------------------------------------|
| RNA Area:               | 505.2     | RNA Integrity Number (RIN): | 9.9 (B.02.08)                                                                                                               |
| RNA Concentration:      | 391 ng/μl | Result Flagging Color:      | <span style="background-color: #ccccff; border: 1px solid black; display: inline-block; width: 20px; height: 10px;"></span> |
| rRNA Ratio [28s / 18s]: | 2.2       | Result Flagging Label:      | RIN: 9.90                                                                                                                   |

**Fragment table for sample 2 : control 2**

| Name | Start Time [s] | End Time [s] | Area  | % of total Area |
|------|----------------|--------------|-------|-----------------|
| 18S  | 40.65          | 43.39        | 101.8 | 20.1            |
| 28S  | 45.76          | 52.75        | 222.1 | 44.0            |

Assay Class: Eukaryote Total RNA Nano  
 Data Path: C:\...Eukaryote Total RNA Nano\_DE72902546\_2019-11-07\_15-38-37.xad

Created: 11/7/2019 3:38:37 PM  
 Modified: 11/7/2019 4:02:30 PM

**Electropherogram Summary Continued ...**

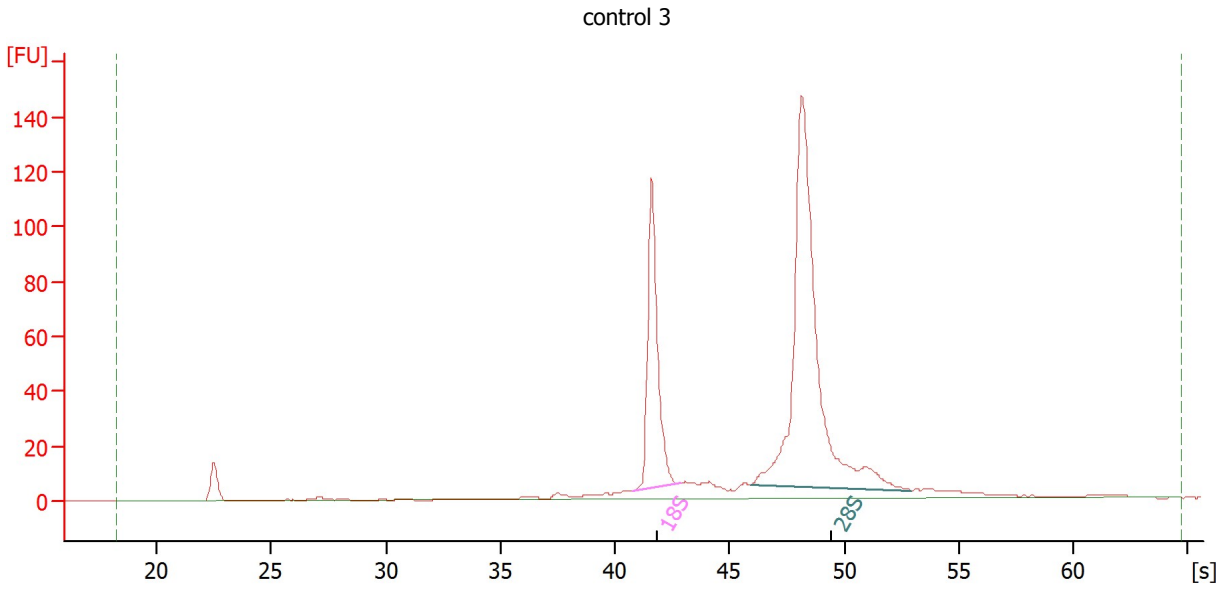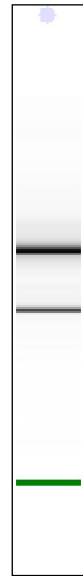

**Overall Results for sample 3 : control 3**

|                         |           |                             |                                                                                                                             |
|-------------------------|-----------|-----------------------------|-----------------------------------------------------------------------------------------------------------------------------|
| RNA Area:               | 634.5     | RNA Integrity Number (RIN): | 10 (B.02.08)                                                                                                                |
| RNA Concentration:      | 492 ng/μl | Result Flagging Color:      | <span style="background-color: #ccccff; border: 1px solid black; display: inline-block; width: 20px; height: 10px;"></span> |
| rRNA Ratio [28s / 18s]: | 2.5       | Result Flagging Label:      | RIN:10                                                                                                                      |

**Fragment table for sample 3 : control 3**

| Name | Start Time [s] | End Time [s] | Area  | % of total Area |
|------|----------------|--------------|-------|-----------------|
| 18S  | 40.78          | 42.84        | 133.4 | 21.0            |
| 28S  | 45.94          | 52.92        | 333.9 | 52.6            |

Assay Class: Eukaryote Total RNA Nano  
 Data Path: C:\...Eukaryote Total RNA Nano\_DE72902546\_2019-11-07\_15-38-37.xad

Created: 11/7/2019 3:38:37 PM  
 Modified: 11/7/2019 4:02:30 PM

**Electropherogram Summary Continued ...**

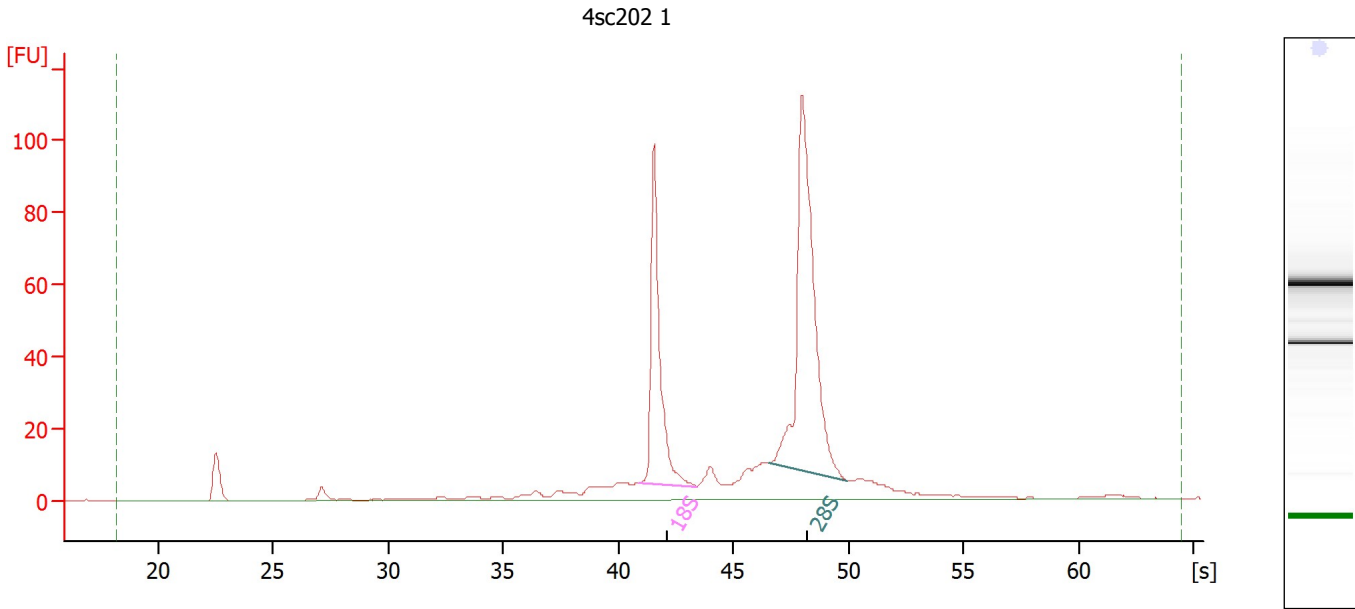

**Overall Results for sample 4 : 4sc202 1**

|                         |           |                             |                                                                                                                             |
|-------------------------|-----------|-----------------------------|-----------------------------------------------------------------------------------------------------------------------------|
| RNA Area:               | 495.2     | RNA Integrity Number (RIN): | 9.5 (B.02.08)                                                                                                               |
| RNA Concentration:      | 384 ng/μl | Result Flagging Color:      | <span style="background-color: #ccccff; border: 1px solid black; display: inline-block; width: 20px; height: 10px;"></span> |
| rRNA Ratio [28s / 18s]: | 1.8       | Result Flagging Label:      | RIN: 9.50                                                                                                                   |

**Fragment table for sample 4 : 4sc202 1**

| Name | Start Time [s] | End Time [s] | Area  | % of total Area |
|------|----------------|--------------|-------|-----------------|
| 18S  | 40.89          | 43.37        | 101.2 | 20.4            |
| 28S  | 46.49          | 49.90        | 184.6 | 37.3            |

Assay Class: Eukaryote Total RNA Nano  
 Data Path: C:\...Eukaryote Total RNA Nano\_DE72902546\_2019-11-07\_15-38-37.xad

Created: 11/7/2019 3:38:37 PM  
 Modified: 11/7/2019 4:02:30 PM

**Electropherogram Summary Continued ...**

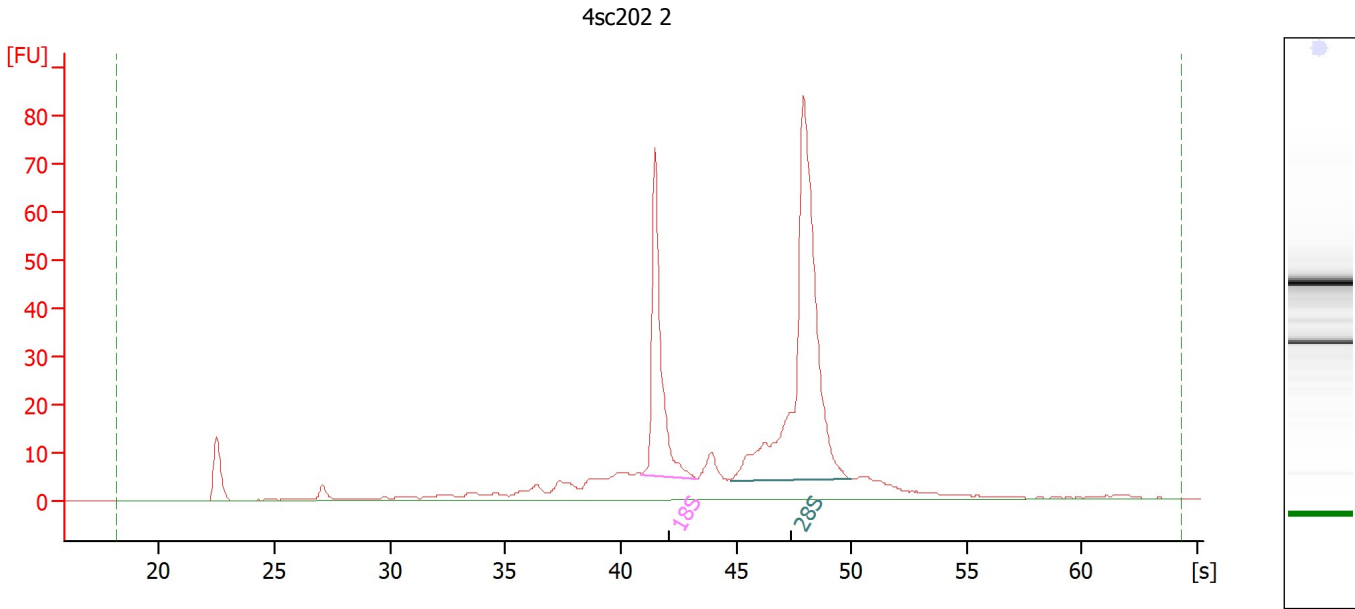

**Overall Results for sample 5 : 4sc202 2**

|                         |           |                             |                                                                                                                             |
|-------------------------|-----------|-----------------------------|-----------------------------------------------------------------------------------------------------------------------------|
| RNA Area:               | 445.4     | RNA Integrity Number (RIN): | 9.1 (B.02.08)                                                                                                               |
| RNA Concentration:      | 345 ng/μl | Result Flagging Color:      | <span style="background-color: #ccccff; border: 1px solid black; display: inline-block; width: 20px; height: 10px;"></span> |
| rRNA Ratio [28s / 18s]: | 2.4       | Result Flagging Label:      | RIN: 9.10                                                                                                                   |

**Fragment table for sample 5 : 4sc202 2**

| Name | Start Time [s] | End Time [s] | Area  | % of total Area |
|------|----------------|--------------|-------|-----------------|
| 18S  | 40.90          | 43.28        | 73.4  | 16.5            |
| 28S  | 44.77          | 49.98        | 173.0 | 38.8            |

Assay Class: Eukaryote Total RNA Nano  
 Data Path: C:\...Eukaryote Total RNA Nano\_DE72902546\_2019-11-07\_15-38-37.xad

Created: 11/7/2019 3:38:37 PM  
 Modified: 11/7/2019 4:02:30 PM

**Electropherogram Summary Continued ...**

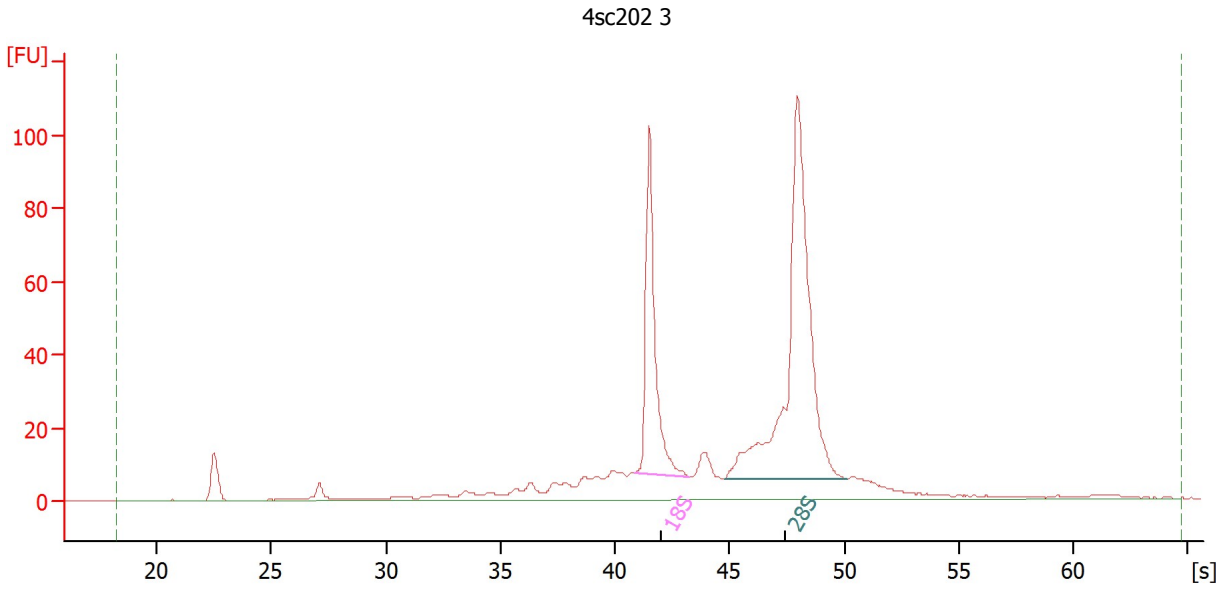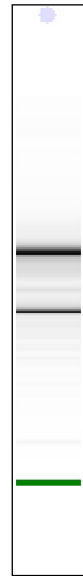

**Overall Results for sample 6 : 4sc202 3**

|                         |           |                             |                                                                                                                             |
|-------------------------|-----------|-----------------------------|-----------------------------------------------------------------------------------------------------------------------------|
| RNA Area:               | 609.4     | RNA Integrity Number (RIN): | 9.1 (B.02.08)                                                                                                               |
| RNA Concentration:      | 472 ng/μl | Result Flagging Color:      | <span style="background-color: #ccccff; border: 1px solid black; display: inline-block; width: 20px; height: 10px;"></span> |
| rRNA Ratio [28s / 18s]: | 2.3       | Result Flagging Label:      | RIN: 9.10                                                                                                                   |

**Fragment table for sample 6 : 4sc202 3**

| Name | Start Time [s] | End Time [s] | Area  | % of total Area |
|------|----------------|--------------|-------|-----------------|
| 18S  | 40.88          | 43.27        | 101.8 | 16.7            |
| 28S  | 44.77          | 50.16        | 235.9 | 38.7            |



Assay Class: Eukaryote Total RNA Nano  
 Data Path: C:\...Eukaryote Total RNA Nano\_DE72902546\_2019-11-07\_15-38-37.xad

Created: 11/7/2019 3:38:37 PM  
 Modified: 11/7/2019 4:02:30 PM

**Electropherogram Summary Continued ...**

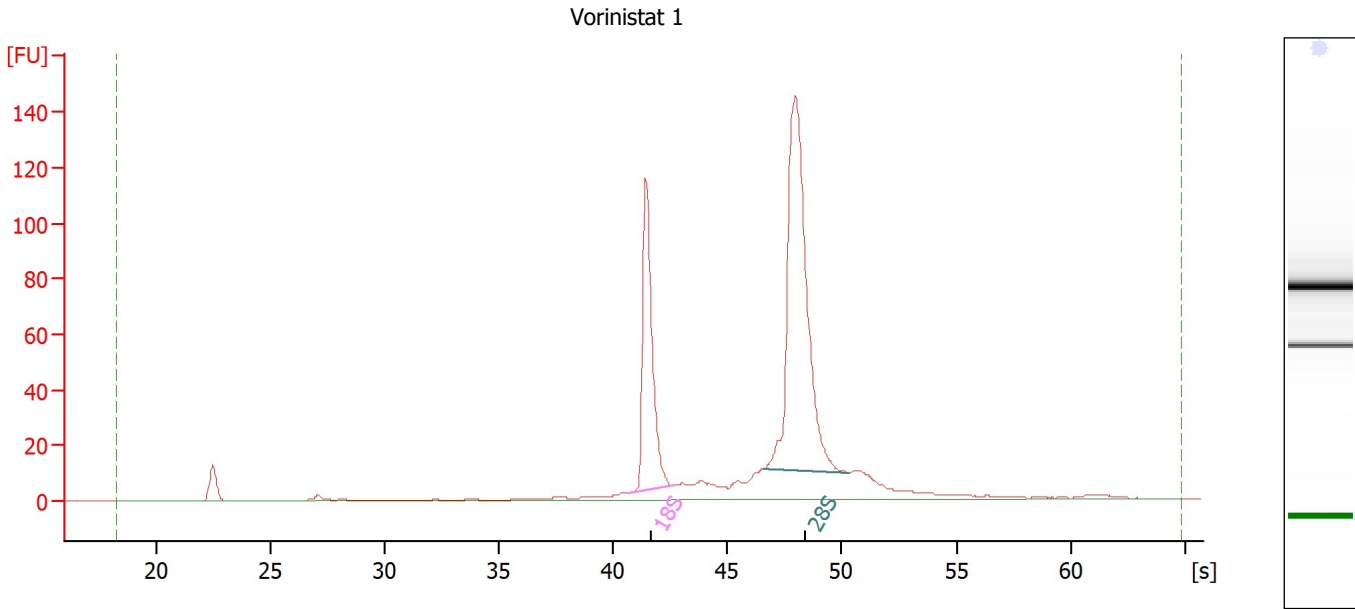

**Overall Results for sample 7 : Vorinistat 1**

|                         |           |                             |                                                                                                                             |
|-------------------------|-----------|-----------------------------|-----------------------------------------------------------------------------------------------------------------------------|
| RNA Area:               | 611.4     | RNA Integrity Number (RIN): | 10 (B.02.08)                                                                                                                |
| RNA Concentration:      | 474 ng/μl | Result Flagging Color:      | <span style="background-color: #ccccff; border: 1px solid black; display: inline-block; width: 20px; height: 10px;"></span> |
| rRNA Ratio [28s / 18s]: | 2.1       | Result Flagging Label:      | RIN:10                                                                                                                      |

**Fragment table for sample 7 : Vorinistat 1**

| Name | Start Time [s] | End Time [s] | Area  | % of total Area |
|------|----------------|--------------|-------|-----------------|
| 18S  | 40.73          | 42.75        | 126.1 | 20.6            |
| 28S  | 46.60          | 50.31        | 269.6 | 44.1            |

Assay Class: Eukaryote Total RNA Nano  
 Data Path: C:\...Eukaryote Total RNA Nano\_DE72902546\_2019-11-07\_15-38-37.xad

Created: 11/7/2019 3:38:37 PM  
 Modified: 11/7/2019 4:02:30 PM

**Electropherogram Summary Continued ...**

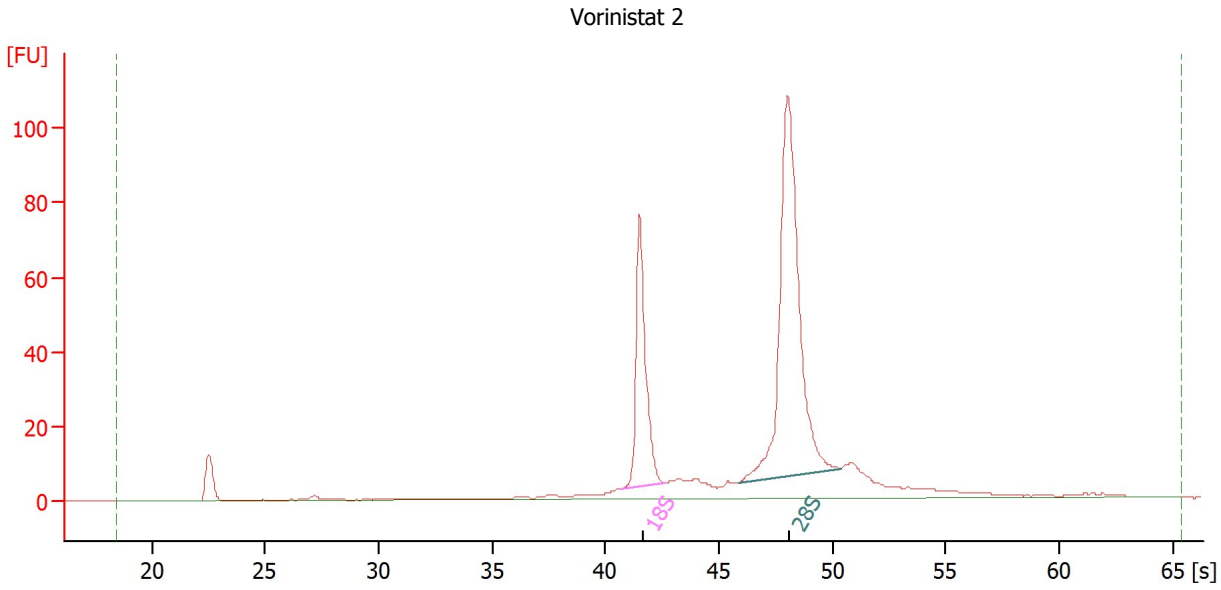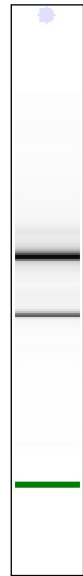

**Overall Results for sample 8 : Vorinistat 2**

|                         |           |                             |                                                                                                                             |
|-------------------------|-----------|-----------------------------|-----------------------------------------------------------------------------------------------------------------------------|
| RNA Area:               | 465.5     | RNA Integrity Number (RIN): | 10 (B.02.08)                                                                                                                |
| RNA Concentration:      | 361 ng/μl | Result Flagging Color:      | <span style="background-color: #ccccff; border: 1px solid black; display: inline-block; width: 20px; height: 10px;"></span> |
| rRNA Ratio [28s / 18s]: | 2.4       | Result Flagging Label:      | RIN:10                                                                                                                      |

**Fragment table for sample 8 : Vorinistat 2**

| Name | Start Time [s] | End Time [s] | Area  | % of total Area |
|------|----------------|--------------|-------|-----------------|
| 18S  | 40.69          | 42.58        | 85.4  | 18.3            |
| 28S  | 45.85          | 50.35        | 206.7 | 44.4            |

Assay Class: Eukaryote Total RNA Nano  
 Data Path: C:\...Eukaryote Total RNA Nano\_DE72902546\_2019-11-07\_15-38-37.xad

Created: 11/7/2019 3:38:37 PM  
 Modified: 11/7/2019 4:02:30 PM

**Electropherogram Summary Continued ...**

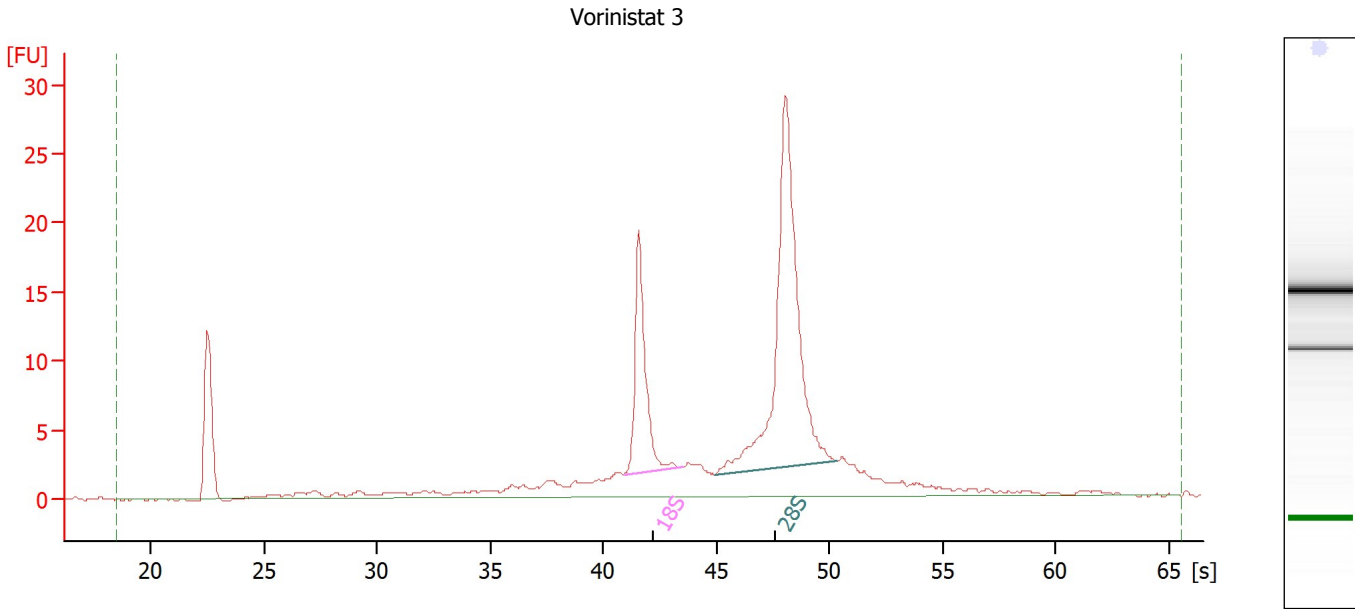

**Overall Results for sample 9 : Vorinistat 3**

|                         |           |                             |                                                                                                                             |
|-------------------------|-----------|-----------------------------|-----------------------------------------------------------------------------------------------------------------------------|
| RNA Area:               | 170.8     | RNA Integrity Number (RIN): | 9.1 (B.02.08)                                                                                                               |
| RNA Concentration:      | 132 ng/μl | Result Flagging Color:      | <span style="background-color: #ccccff; border: 1px solid black; display: inline-block; width: 20px; height: 10px;"></span> |
| rRNA Ratio [28s / 18s]: | 2.7       | Result Flagging Label:      | RIN: 9.10                                                                                                                   |

**Fragment table for sample 9 : Vorinistat 3**

| Name | Start Time [s] | End Time [s] | Area | % of total Area |
|------|----------------|--------------|------|-----------------|
| 18S  | 40.92          | 43.53        | 22.1 | 12.9            |
| 28S  | 44.91          | 50.32        | 59.7 | 34.9            |

Assay Class: Eukaryote Total RNA Nano  
Data Path: C:\...Eukaryote Total RNA Nano\_DE72902546\_2019-11-07\_15-38-37.xad

Created: 11/7/2019 3:38:37 PM  
Modified: 11/7/2019 4:02:30 PM

**Electropherogram Summary Continued ...**

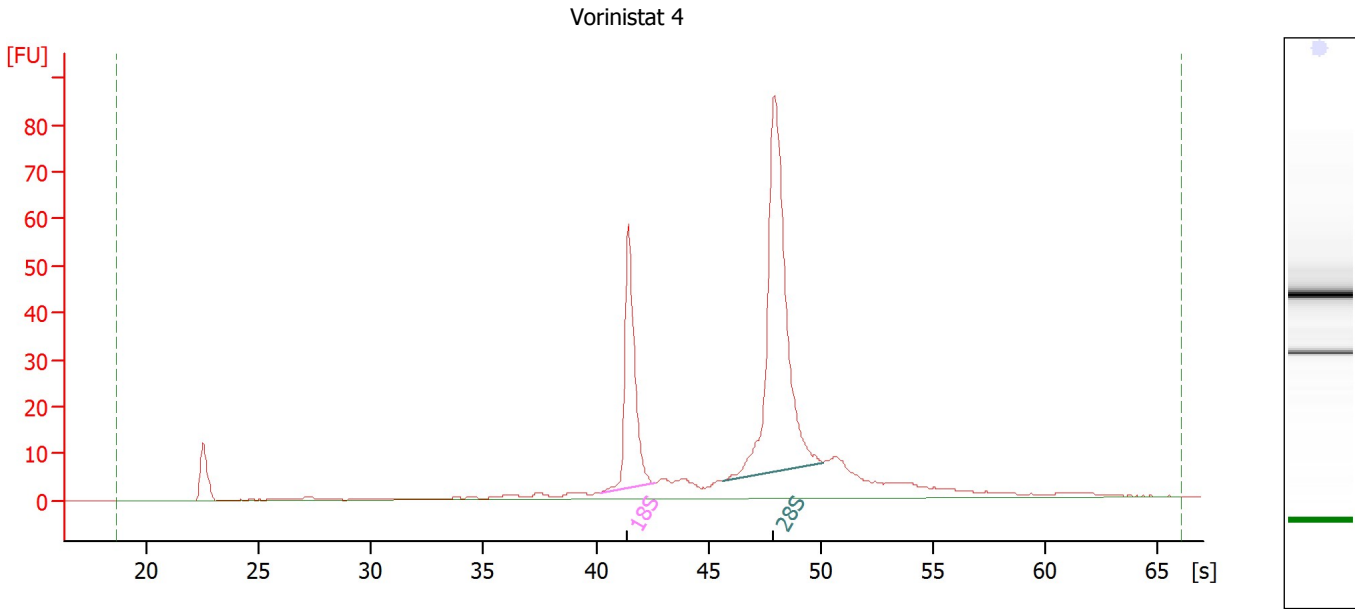

**Overall Results for sample 10 : Vorinostat 4**

RNA Area: 379.0      RNA Integrity Number (RIN): 10 (B.02.08)  
RNA Concentration: 294 ng/μl      Result Flagging Color:   
rRNA Ratio [28s / 18s]: 2.3      Result Flagging Label: RIN:10

**Fragment table for sample 10 : Vorinostat 4**

| Name | Start Time [s] | End Time [s] | Area  | % of total Area |
|------|----------------|--------------|-------|-----------------|
| 18S  | 40.21          | 42.61        | 66.9  | 17.7            |
| 28S  | 45.67          | 50.12        | 156.7 | 41.3            |

Assay Class: Eukaryote Total RNA Nano  
 Data Path: C:\...Eukaryote Total RNA Nano\_DE72902546\_2019-11-07\_15-38-37.xad

Created: 11/7/2019 3:38:37 PM  
 Modified: 11/7/2019 4:02:30 PM

**Electropherogram Summary Continued ...**

Sample 11

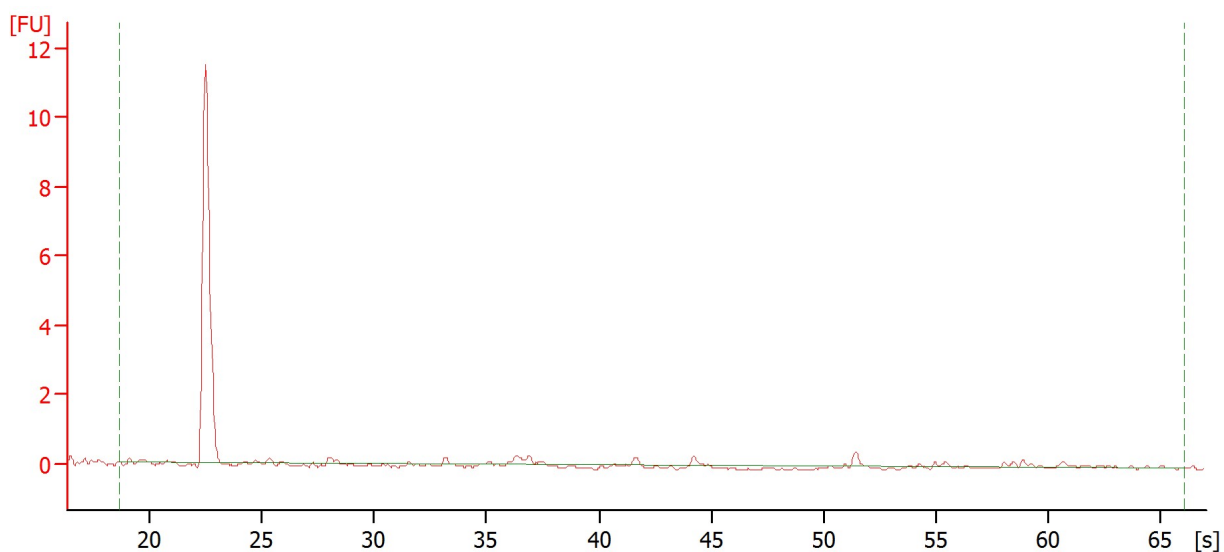

**Overall Results for sample 11 : Sample 11**

|                         |         |                             |                                                                                                                             |
|-------------------------|---------|-----------------------------|-----------------------------------------------------------------------------------------------------------------------------|
| RNA Area:               | 2.4     | RNA Integrity Number (RIN): | N/A (B.02.08)                                                                                                               |
| RNA Concentration:      | 2 ng/μl | Result Flagging Color:      | <span style="background-color: #cccccc; border: 1px solid black; display: inline-block; width: 20px; height: 10px;"></span> |
| rRNA Ratio [28s / 18s]: | 0.0     | Result Flagging Label:      | RIN N/A                                                                                                                     |

Assay Class: Eukaryote Total RNA Nano  
 Data Path: C:\...Eukaryote Total RNA Nano\_DE72902546\_2019-11-07\_15-38-37.xad

Created: 11/7/2019 3:38:37 PM  
 Modified: 11/7/2019 4:02:30 PM

**Electropherogram Summary Continued ...**

Sample 12

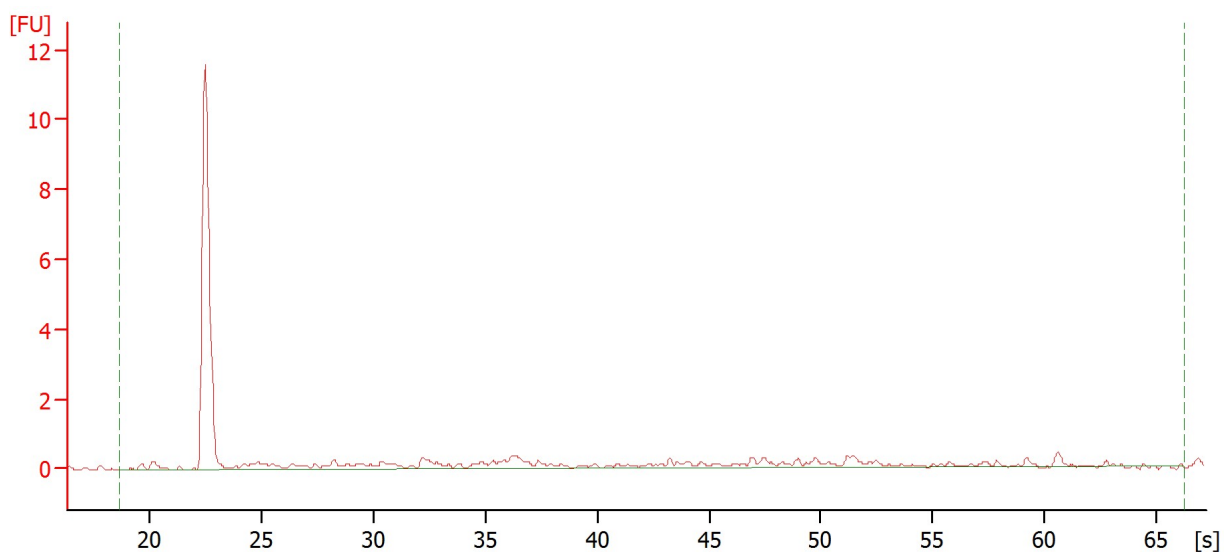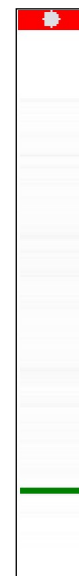

**Overall Results for sample 12 : Sample 12**

|                         |         |                             |                                                                                                                             |
|-------------------------|---------|-----------------------------|-----------------------------------------------------------------------------------------------------------------------------|
| RNA Area:               | 10.7    | RNA Integrity Number (RIN): | N/A (B.02.08)                                                                                                               |
| RNA Concentration:      | 8 ng/μl | Result Flagging Color:      | <span style="background-color: #cccccc; border: 1px solid black; display: inline-block; width: 20px; height: 10px;"></span> |
| rRNA Ratio [28s / 18s]: | 0.0     | Result Flagging Label:      | RIN N/A                                                                                                                     |

Assay Class: Eukaryote Total RNA Nano  
Data Path: C:\...Eukaryote Total RNA Nano\_DE72902546\_2019-11-07\_15-38-37.xad

Created: 11/7/2019 3:38:37 PM  
Modified: 11/7/2019 4:02:30 PM

Gel Image

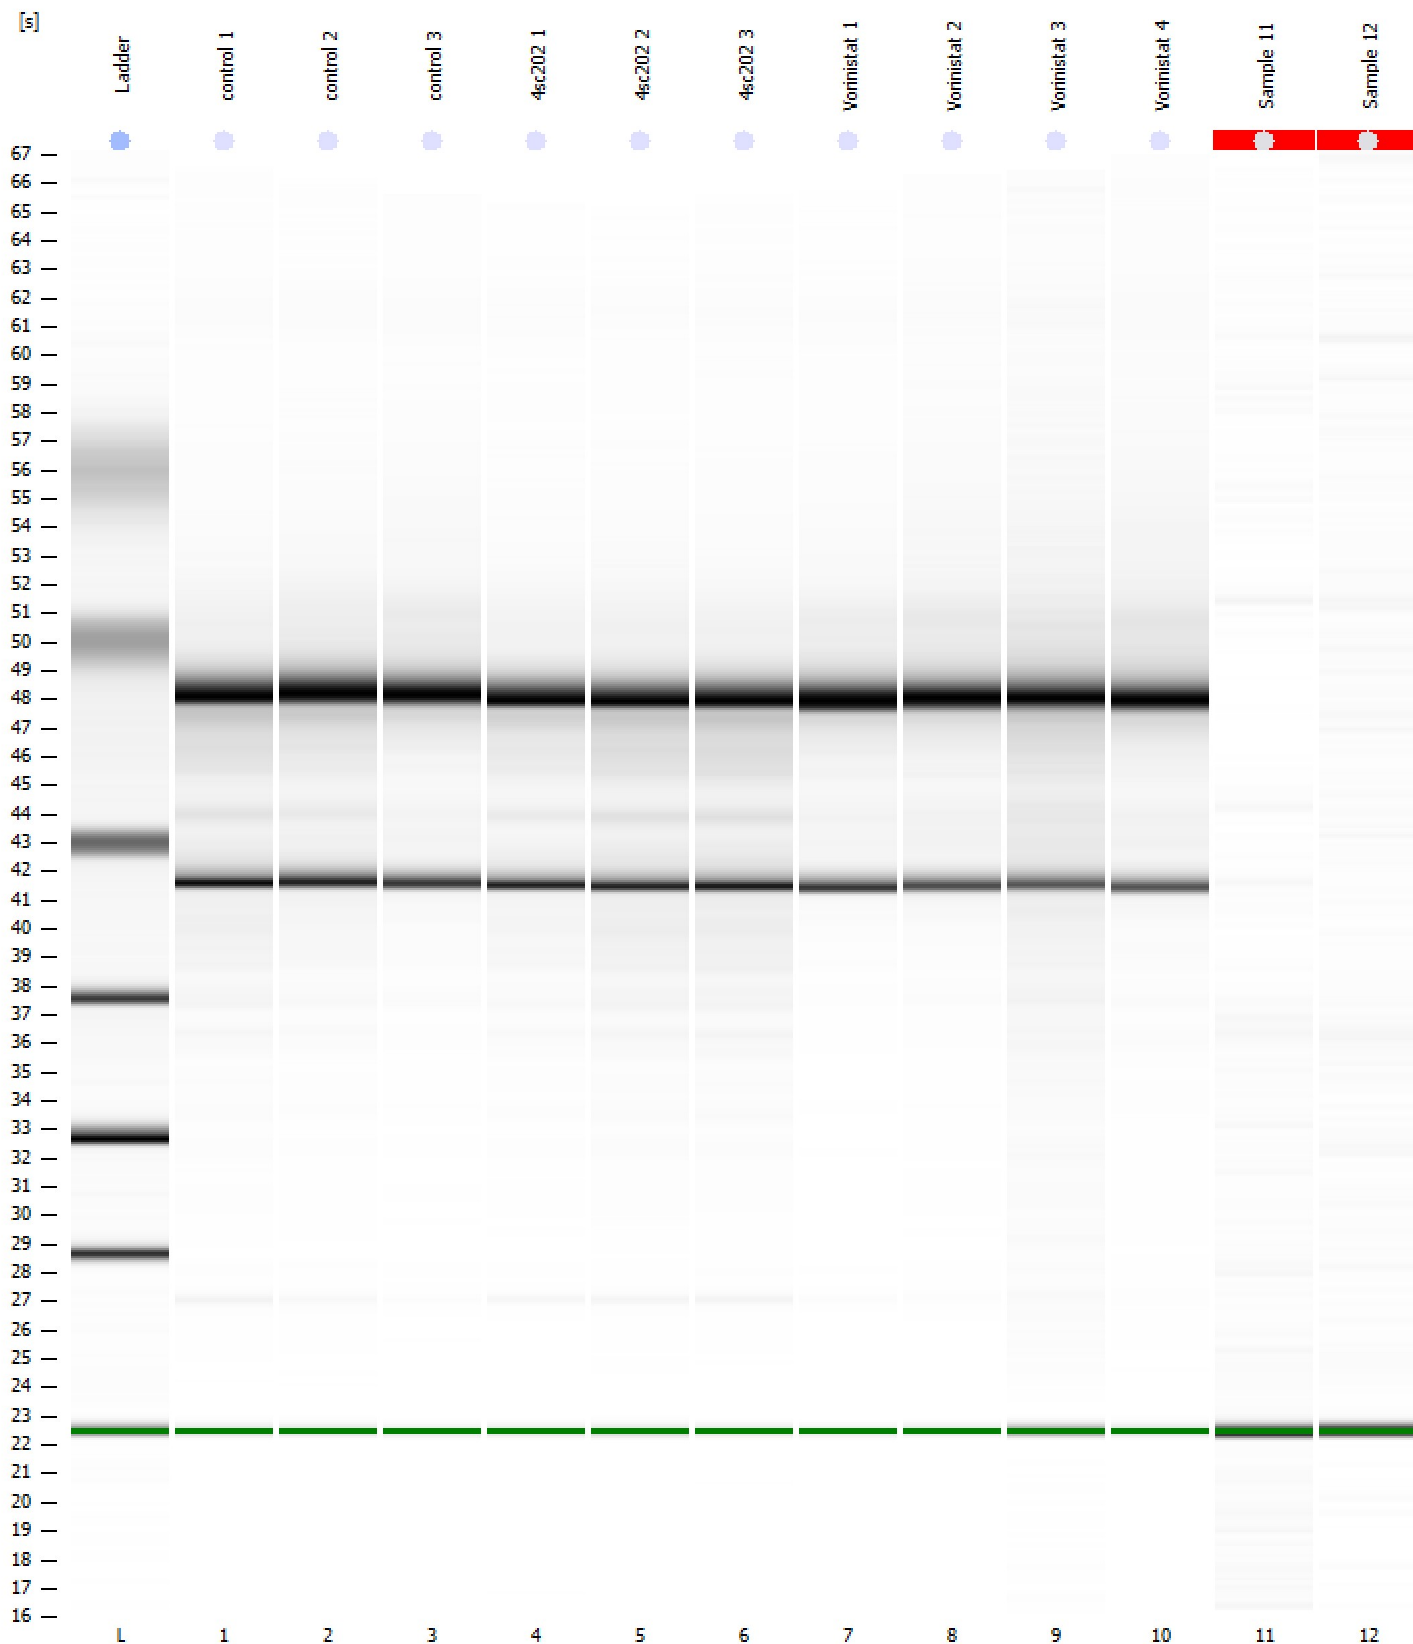

Assay Class: Eukaryote Total RNA Nano Created: 11/7/2019 3:38:37 PM  
 Data Path: C:\...Eukaryote Total RNA Nano\_DE72902546\_2019-11-07\_15-38-37.xad Modified: 11/7/2019 4:02:30 PM

**Run Logbook**

| Description                                                                                                                                                                       | Number | Source     | Category | Sub Category | Time                 | Time Zone                           | User     | Host            |
|-----------------------------------------------------------------------------------------------------------------------------------------------------------------------------------|--------|------------|----------|--------------|----------------------|-------------------------------------|----------|-----------------|
| Run ended on port 5 (Number of wells acquired: 13)                                                                                                                                |        | Instrument | Run      |              | 11/7/2019 4:02:28 PM | (GMT --06:00) Central Standard Time | mukherjm | SANFORDHEALTH H |
| Run started on port 5 (File: C:\Program Files (x86)\Agilent\2100 bioanalyzer\2100 expert\Data\2019-11-07\2100 expert_Eukaryote Total RNA Nano_DE72902546_2019-11-07_15-38-37.xad) |        | Instrument | Run      |              | 11/7/2019 3:38:43 PM | (GMT --06:00) Central Standard Time | mukherjm | SANFORDHEALTH H |
| Product Number : G2939A                                                                                                                                                           |        | Instrument | Run      |              | 11/7/2019 3:38:43 PM | (GMT --06:00) Central Standard Time | mukherjm | SANFORDHEALTH H |
| Name :                                                                                                                                                                            |        | Instrument | Run      |              | 11/7/2019 3:38:43 PM | (GMT --06:00) Central Standard Time | mukherjm | SANFORDHEALTH H |
| Vendor : Agilent Technologies                                                                                                                                                     |        | Instrument | Run      |              | 11/7/2019 3:38:43 PM | (GMT --06:00) Central Standard Time | mukherjm | SANFORDHEALTH H |
| Serial# : DE72902546                                                                                                                                                              |        | Instrument | Run      |              | 11/7/2019 3:38:43 PM | (GMT --06:00) Central Standard Time | mukherjm | SANFORDHEALTH H |
| Firmware : C.01.069                                                                                                                                                               |        | Instrument | Run      |              | 11/7/2019 3:38:43 PM | (GMT --06:00) Central Standard Time | mukherjm | SANFORDHEALTH H |
| Cartridge : Electrode                                                                                                                                                             |        | Instrument | Run      |              | 11/7/2019 3:38:43 PM | (GMT --06:00) Central Standard Time | mukherjm | SANFORDHEALTH H |
