# Supplementary material for: Reduction of Metastasis via Epigenetic Modulation in a Murine Model of Metastatic Triple Negative Breast Cancer (TNBC)
Source: Cancers (Basel). 2022 Mar 30;14(7):1753. doi: 10.3390/cancers14071753 (PMC8996906; doi:10.3390/cancers14071753)
Supplement: Supplementary file 1 [file cancers-14-01753-s001.zip]

Archive with 7 entries (7 files):
- FileS1_Figures_Proofread.pdf
- FileS2_DAVID_4SCvsControl_70DEGs.xlsx
- FileS3_DAVID_4SCvsVori_33DEGs.xlsx
- FileS4_IPA_70_AllResults.xls
- FileS5_IPA_33_Summary.pdf
- FileS6_ExperimentRINNumbers.pdf
- FileS7_4SCvsControl_allDEGs.xlsx
