# Supplementary material for: Reduction of Metastasis via Epigenetic Modulation in a Murine Model of Metastatic Triple Negative Breast Cancer (TNBC)
Source: Cancers (Basel). 2022 Mar 30;14(7):1753. doi: 10.3390/cancers14071753 (PMC8996906; doi:10.3390/cancers14071753)
Supplement: Supplementary file 1 [file cancers-14-01753-s001.zip › FileS2_DAVID_4SCvsControl_70DEGs.xlsx]

## Sheet: 4SCvsControl_bulk_enrichment_da
Annotation Cluster 1	Enrichment Score: 6.348424353314569
Category	Term	Count	%	PValue	Genes	List Total	Pop Hits	Pop Total	Fold Enrichment	Bonferroni	Benjamini	FDR
UP_KEYWORDS	Disulfide bond	31	46.9697	2.85643e-08	KCNK5, MOXD1, PAPLN, PDGFA, TGFA, PRSS22, SLC6A2, EFNB1, CCL7, PRDX1, LBP, CD300LF, CTSC, CDON, PDGFRB, MSR1, PDGFRA, CADM4, ANGPT1, IL1R1, PCOLCE, CP, SOD3, DCN, PDGFRL, TGFBR3, IL23A, CLEC6A, CLEC2D, LGMN, TLR2	66	3434	20581	2.81504	4.51314e-06	4.51315e-06	4.3989e-06
UP_SEQ_FEATURE	signal peptide	30	45.4545	1.2032e-07	EPHB6, MOXD1, PAPLN, PDGFA, TGFA, PRSS22, EFNB1, CCL7, IBSP, LBP, CD300LF, CTSC, WLS, CDON, PDGFRB, PDGFRA, CADM4, ANGPT1, IL1R1, PCOLCE, PLET1, CP, SOD3, DCN, PDGFRL, TGFBR3, IL23A, COL6A1, LGMN, TLR2	66	3346	20063	2.72551	3.08014e-05	3.09222e-05	3.02002e-05
UP_SEQ_FEATURE	glycosylation site:N-linked (GlcNAc...)	33	50	4.47179e-07	EPHB6, KCNK5, MOXD1, PLVAP, PDGFA, TGFA, PRSS22, SLC6A2, EFNB1, CCL7, IBSP, LBP, CD300LF, CTSC, CDON, PDGFRB, MSR1, PDGFRA, CADM4, ANGPT1, IL1R1, PCOLCE, PLET1, CP, SOD3, DCN, PDGFRL, TGFBR3, CLEC6A, COL6A1, CLEC2D, LGMN, TLR2	66	4234	20063	2.36927	0.000114471	5.74625e-05	5.6121e-05
UP_KEYWORDS	Glycoprotein	33	50	1.33985e-06	EPHB6, KCNK5, MOXD1, PLVAP, PDGFA, TGFA, PRSS22, SLC6A2, EFNB1, CCL7, IBSP, LBP, CD300LF, CTSC, CDON, PDGFRB, MSR1, PDGFRA, CADM4, ANGPT1, IL1R1, PCOLCE, PLET1, CP, SOD3, DCN, PDGFRL, TGFBR3, CLEC6A, COL6A1, CLEC2D, LGMN, TLR2	66	4551	20581	2.26115	0.000211673	0.000105848	0.000103168
UP_SEQ_FEATURE	disulfide bond	26	39.3939	1.80512e-06	KCNK5, MOXD1, PAPLN, PDGFA, TGFA, PRSS22, EFNB1, CCL7, PRDX1, CD300LF, CTSC, CDON, PDGFRB, MSR1, PDGFRA, CADM4, ANGPT1, IL1R1, PCOLCE, CP, SOD3, DCN, PDGFRL, CLEC6A, CLEC2D, TLR2	66	2917	20063	2.7095	0.000462004	0.000154639	0.000151028
UP_KEYWORDS	Signal	31	46.9697	2.184e-06	EPHB6, MOXD1, PAPLN, PDGFA, TGFA, PRSS22, EFNB1, CCL7, IBSP, LBP, CD300LF, CTSC, WLS, CDON, PDGFRB, PDGFRA, CADM4, ANGPT1, IL1R1, PCOLCE, PLET1, CP, SOD3, DCN, PDGFRL, TGFBR3, IL23A, COL6A1, CLEC2D, LGMN, TLR2	66	4160	20581	2.32376	0.000345012	0.000115024	0.000112112
Annotation Cluster 2	Enrichment Score: 2.513493109663859
Category	Term	Count	%	PValue	Genes	List Total	Pop Hits	Pop Total	Fold Enrichment	Bonferroni	Benjamini	FDR
UP_SEQ_FEATURE	domain:Ig-like C2-type 1	7	10.6061	4.87333e-05	PDGFRB, PDGFRA, CADM4, IL1R1, PAPLN, PDGFRL, CDON	66	202	20063	10.5341	0.0123985	0.00257469	0.00251458
UP_SEQ_FEATURE	domain:Ig-like C2-type 2	7	10.6061	5.00913e-05	PDGFRB, PDGFRA, CADM4, IL1R1, PAPLN, PDGFRL, CDON	66	203	20063	10.4822	0.0127418	0.00257469	0.00251458
UP_SEQ_FEATURE	domain:Ig-like C2-type 3	5	7.57576	0.00079212	PDGFRB, PDGFRA, IL1R1, PAPLN, CDON	66	128	20063	11.8744	0.18361	0.0290821	0.0284032
INTERPRO	IPR013098:Immunoglobulin I-set	5	7.57576	0.00150947	PDGFRB, PDGFRA, IL1R1, PAPLN, CDON	66	141	18559	9.97152	0.255147	0.0888719	0.0888719
UP_KEYWORDS	Immunoglobulin domain	8	12.1212	0.00163839	PDGFRB, PDGFRA, CADM4, IL1R1, PAPLN, CD300LF, PDGFRL, CDON	66	546	20581	4.56899	0.228237	0.0517731	0.0504624
INTERPRO	IPR003599:Immunoglobulin subtype	8	12.1212	0.00172401	PDGFRB, PDGFRA, CADM4, IL1R1, PAPLN, CD300LF, PDGFRL, CDON	66	497	18559	4.52631	0.285714	0.0888719	0.0888719
INTERPRO	IPR003598:Immunoglobulin subtype 2	6	9.09091	0.00182301	PDGFRB, PDGFRA, CADM4, PAPLN, PDGFRL, CDON	66	250	18559	6.74873	0.299396	0.0888719	0.0888719
SMART	SM00408:IGc2	6	9.09091	0.0029479	PDGFRB, PDGFRA, CADM4, PAPLN, PDGFRL, CDON	41	250	10057	5.88702	0.132126	0.074569	0.074569
SMART	SM00409:IG	8	12.1212	0.00310704	PDGFRB, PDGFRA, CADM4, IL1R1, PAPLN, CD300LF, PDGFRL, CDON	41	497	10057	3.94837	0.13875	0.074569	0.074569
UP_SEQ_FEATURE	domain:Ig-like C2-type 5	3	4.54545	0.0137434	PDGFRB, PDGFRA, CDON	66	55	20063	16.581	0.971065	0.353206	0.34496
INTERPRO	IPR013783:Immunoglobulin-like fold	9	13.6364	0.0175472	EPHB6, PDGFRB, PDGFRA, CADM4, IL1R1, PAPLN, CD300LF, PDGFRL, CDON	66	951	18559	2.66117	0.96832	0.499083	0.499083
INTERPRO	IPR007110:Immunoglobulin-like domain	8	12.1212	0.0179158	PDGFRB, PDGFRA, CADM4, IL1R1, PAPLN, CD300LF, PDGFRL, CDON	66	771	18559	2.91774	0.970556	0.499083	0.499083
UP_SEQ_FEATURE	domain:Ig-like C2-type 4	3	4.54545	0.0252567	PDGFRB, PDGFRA, CDON	66	76	20063	11.9994	0.998568	0.540913	0.528285
INTERPRO	IPR013106:Immunoglobulin V-set	3	4.54545	0.430896	CADM4, PAPLN, CD300LF	66	417	18559	2.023	1	1	1
Annotation Cluster 3	Enrichment Score: 1.9191346086703378
Category	Term	Count	%	PValue	Genes	List Total	Pop Hits	Pop Total	Fold Enrichment	Bonferroni	Benjamini	FDR
GOTERM_MF_DIRECT	GO:0048407~platelet-derived growth factor binding	4	6.06061	5.90811e-06	PDGFRB, PDGFRA, COL6A1, PDGFA	58	11	16881	105.837	0.00112191	0.00112254	0.00112254
GOTERM_MF_DIRECT	GO:0005161~platelet-derived growth factor receptor binding	4	6.06061	1.61364e-05	PDGFRB, PDGFRA, IL1R1, PDGFA	58	15	16881	77.6138	0.00306125	0.00153296	0.00153296
GOTERM_BP_DIRECT	GO:0014068~positive regulation of phosphatidylinositol 3-kinase signaling	5	7.57576	8.47249e-05	PDGFRB, PDGFRA, ANGPT1, PDGFA, DCN	61	65	16792	21.1753	0.054386	0.0559184	0.0558337
GOTERM_BP_DIRECT	GO:0042060~wound healing	5	7.57576	0.000190177	PDGFRB, PDGFRA, PDGFA, TGFA, DCN	61	80	16792	17.2049	0.117969	0.0627583	0.0626632
GOTERM_BP_DIRECT	GO:0070374~positive regulation of ERK1 and ERK2 cascade	6	9.09091	0.000398921	PDGFRB, PDGFRA, JUN, CCL7, ANGPT1, PDGFA	61	175	16792	9.43813	0.23152	0.0877625	0.0876296
KEGG_PATHWAY	hsa05166:HTLV-I infection	7	10.6061	0.000807762	PDGFRB, PDGFRA, PPP3CA, JUN, IL1R1, PDGFA, TCF3	32	254	6879	5.92434	0.0753912	0.0783529	0.0743141
GOTERM_BP_DIRECT	GO:0048146~positive regulation of fibroblast proliferation	4	6.06061	0.000944995	PDGFRB, PDGFRA, JUN, PDGFA	61	54	16792	20.391	0.464198	0.155924	0.155688
KEGG_PATHWAY	hsa04510:Focal adhesion	6	9.09091	0.00206521	PDGFRB, PDGFRA, JUN, IBSP, COL6A1, PDGFA	32	206	6879	6.26123	0.181705	0.0936288	0.0888025
KEGG_PATHWAY	hsa05214:Glioma	4	6.06061	0.00299674	PDGFRB, PDGFRA, PDGFA, TGFA	32	65	6879	13.2288	0.252574	0.0936288	0.0888025
KEGG_PATHWAY	hsa04151:PI3K-Akt signaling pathway	7	10.6061	0.00386098	PDGFRB, PDGFRA, IBSP, ANGPT1, COL6A1, PDGFA, TLR2	32	345	6879	4.36168	0.312876	0.0936288	0.0888025
GOTERM_BP_DIRECT	GO:0030335~positive regulation of cell migration	5	7.57576	0.00421918	PDGFRB, PDGFRA, CCL7, PDGFA, PLET1	61	184	16792	7.4804	0.938613	0.451697	0.451012
GOTERM_BP_DIRECT	GO:0048008~platelet-derived growth factor receptor signaling pathway	3	4.54545	0.00479072	PDGFRB, PDGFRA, PDGFA	61	29	16792	28.4771	0.957974	0.451697	0.451012
KEGG_PATHWAY	hsa04010:MAPK signaling pathway	6	9.09091	0.0050167	PDGFRB, PDGFRA, PPP3CA, JUN, IL1R1, PDGFA	32	253	6879	5.09807	0.386051	0.0972862	0.0922714
GOTERM_MF_DIRECT	GO:0005088~Ras guanyl-nucleotide exchange factor activity	4	6.06061	0.00689831	PDGFRB, PDGFRA, ANGPT1, PDGFA	58	115	16881	10.1235	0.731585	0.347148	0.347148
KEGG_PATHWAY	hsa05215:Prostate cancer	4	6.06061	0.00702065	PDGFRB, PDGFRA, PDGFA, TGFA	32	88	6879	9.77131	0.495105	0.0972862	0.0922714
GOTERM_BP_DIRECT	GO:0045740~positive regulation of DNA replication	3	4.54545	0.00986205	PDGFRA, JUN, PDGFA	61	42	16792	19.6628	0.998557	0.538627	0.537811
KEGG_PATHWAY	hsa05231:Choline metabolism in cancer	4	6.06061	0.0102499	PDGFRB, PDGFRA, JUN, PDGFA	32	101	6879	8.51361	0.631889	0.12428	0.117874
BIOCARTA	h_pdgfPathway:PDGF Signaling Pathway	3	4.54545	0.0118334	PDGFRA, JUN, PDGFA	11	28	1625	15.8279	0.544181	0.781002	0.781002
GOTERM_BP_DIRECT	GO:0000165~MAPK cascade	5	7.57576	0.0142669	PDGFRB, PDGFRA, PLVAP, ANGPT1, PDGFA	61	262	16792	5.25341	0.999924	0.58851	0.587618
GOTERM_BP_DIRECT	GO:0043547~positive regulation of GTPase activity	7	10.6061	0.0152149	PDGFRB, PDGFRA, RGS5, JUN, CCL7, ANGPT1, PDGFA	61	565	16792	3.41053	0.99996	0.590698	0.589803
GOTERM_MF_DIRECT	GO:0046934~phosphatidylinositol-4,5-bisphosphate 3-kinase activity	3	4.54545	0.0186081	PDGFRB, PDGFRA, PDGFA	58	62	16881	14.0831	0.971812	0.347148	0.347148
GOTERM_MF_DIRECT	GO:0046982~protein heterodimerization activity	6	9.09091	0.0200981	PPP3CA, JUN, PDGFA, TCF3, ENO3, TLR2	58	465	16881	3.75551	0.97888	0.347148	0.347148
KEGG_PATHWAY	hsa05200:Pathways in cancer	6	9.09091	0.0295043	PDGFRB, EGLN1, PDGFRA, JUN, PDGFA, TGFA	32	393	6879	3.28197	0.94525	0.310936	0.294909
GOTERM_BP_DIRECT	GO:0014066~regulation of phosphatidylinositol 3-kinase signaling	3	4.54545	0.0316949	PDGFRB, PDGFRA, PDGFA	61	78	16792	10.5876	1	0.697616	0.696559
GOTERM_BP_DIRECT	GO:0030198~extracellular matrix organization	4	6.06061	0.0329713	IBSP, COL6A1, PDGFA, DCN	61	196	16792	5.61793	1	0.701969	0.700905
GOTERM_MF_DIRECT	GO:0042803~protein homodimerization activity	7	10.6061	0.0358726	PDGFRA, PLVAP, JUN, CADM4, PDGFA, TCF3, ENO3	58	730	16881	2.79091	0.999033	0.567982	0.567982
UP_KEYWORDS	Chemotaxis	3	4.54545	0.0377391	PDGFRB, PDGFRA, CCL7	66	97	20581	9.64433	0.997708	0.555497	0.541434
UP_KEYWORDS	Proto-oncogene	4	6.06061	0.0386738	PDGFRB, PDGFRA, JUN, TCF3	66	236	20581	5.28531	0.998034	0.555497	0.541434
KEGG_PATHWAY	hsa05218:Melanoma	3	4.54545	0.0402885	PDGFRB, PDGFRA, PDGFA	32	71	6879	9.08319	0.98148	0.325665	0.308878
GOTERM_BP_DIRECT	GO:0046854~phosphatidylinositol phosphorylation	3	4.54545	0.0444971	PDGFRB, PDGFRA, PDGFA	61	94	16792	8.78549	1	0.770048	0.768882
GOTERM_BP_DIRECT	GO:0001525~angiogenesis	4	6.06061	0.0455029	JUN, ANGPT1, PDGFA, TGFA	61	223	16792	4.93773	1	0.770048	0.768882
GOTERM_BP_DIRECT	GO:0048015~phosphatidylinositol-mediated signaling	3	4.54545	0.0551438	PDGFRB, PDGFRA, PDGFA	61	106	16792	7.79091	1	0.887681	0.886336
KEGG_PATHWAY	hsa04540:Gap junction	3	4.54545	0.059218	PDGFRB, PDGFRA, PDGFA	32	88	6879	7.32848	0.997318	0.382943	0.363204
KEGG_PATHWAY	hsa04015:Rap1 signaling pathway	4	6.06061	0.0674142	PDGFRB, PDGFRA, ANGPT1, PDGFA	32	210	6879	4.09464	0.998852	0.393745	0.373449
UP_KEYWORDS	Developmental protein	7	10.6061	0.078536	PDGFRB, PDGFRA, EFNB1, FOXC2, ANGPT1, PDGFA, WLS	66	949	20581	2.30014	0.999998	0.783781	0.763939
KEGG_PATHWAY	hsa04014:Ras signaling pathway	4	6.06061	0.0801912	PDGFRB, PDGFRA, ANGPT1, PDGFA	32	226	6879	3.80476	0.999699	0.418311	0.396748
GOTERM_MF_DIRECT	GO:0019899~enzyme binding	4	6.06061	0.102428	PDGFRB, EGLN1, PPP3CA, JUN	58	333	16881	3.49612	1	1	1
KEGG_PATHWAY	hsa04380:Osteoclast differentiation	3	4.54545	0.117104	PPP3CA, JUN, IL1R1	32	131	6879	4.92295	0.999994	0.540909	0.513027
KEGG_PATHWAY	hsa04020:Calcium signaling pathway	3	4.54545	0.192472	PDGFRB, PDGFRA, PPP3CA	32	179	6879	3.60283	1	0.848628	0.804884
GOTERM_BP_DIRECT	GO:0008284~positive regulation of cell proliferation	4	6.06061	0.23215	PDGFRB, PDGFRA, PDGFA, TGFA	61	466	16792	2.36291	1	1	1
KEGG_PATHWAY	hsa04810:Regulation of actin cytoskeleton	3	4.54545	0.244107	PDGFRB, PDGFRA, PDGFA	32	210	6879	3.07098	1	0.940569	0.892086
KEGG_PATHWAY	hsa05206:MicroRNAs in cancer	3	4.54545	0.371582	PDGFRB, PDGFRA, PDGFA	32	286	6879	2.25492	1	0.976995	0.926634
UP_KEYWORDS	Ubl conjugation	6	9.09091	0.634261	PDGFRB, PDGFRA, FOXC2, JUN, PRDX1, TCF3	66	1705	20581	1.09736	1	1	0.980892
Annotation Cluster 4	Enrichment Score: 1.554273735930526
Category	Term	Count	%	PValue	Genes	List Total	Pop Hits	Pop Total	Fold Enrichment	Bonferroni	Benjamini	FDR
UP_SEQ_FEATURE	topological domain:Extracellular	21	31.8182	0.000355616	EPHB6, PDGFRB, MSR1, PDGFRA, PLVAP, CADM4, IL1R1, TGFA, PLET1, SLC6A2, MS4A6E, MS4A4A, TGFBR3, MS4A6A, EFNB1, CLEC6A, CD300LF, CLEC2D, WLS, TLR2, CDON	66	2787	20063	2.29052	0.0870314	0.0152322	0.0148766
UP_SEQ_FEATURE	topological domain:Cytoplasmic	22	33.3333	0.00221387	EPHB6, KCNK5, PDGFRB, MSR1, PDGFRA, PLVAP, CADM4, IL1R1, TGFA, PLET1, SLC6A2, MS4A6E, MS4A4A, TGFBR3, MS4A6A, EFNB1, CLEC6A, CD300LF, CLEC2D, WLS, TLR2, CDON	66	3456	20063	1.93509	0.43299	0.0711205	0.0694601
GOTERM_CC_DIRECT	GO:0005887~integral component of plasma membrane	13	19.697	0.0034255	EPHB6, KCNK5, MSR1, PDGFRA, CADM4, IL1R1, TGFA, SLC6A2, TGFBR3, EFNB1, CLEC2D, TLR2, CDON	65	1415	18224	2.57583	0.309672	0.061659	0.0582335
UP_KEYWORDS	Receptor	13	19.697	0.00501592	EPHB6, PDGFRB, MSR1, PDGFRA, IL1R1, MS4A4E, MS4A6E, MS4A4A, TGFBR3, MS4A6A, CD300LF, CLEC2D, TLR2	66	1648	20581	2.45985	0.548197	0.113216	0.11035
UP_SEQ_FEATURE	transmembrane region	25	37.8788	0.0239324	EPHB6, KCNK5, MOXD1, PLVAP, PLD4, TGFA, MS4A4E, SLC6A2, MS4A6E, MS4A4A, EFNB1, CD300LF, WLS, CDON, PDGFRB, MSR1, PDGFRA, CADM4, IL1R1, PLET1, TGFBR3, MS4A6A, CLEC6A, CLEC2D, TLR2	66	5056	20063	1.50309	0.997973	0.540913	0.528285
UP_KEYWORDS	Transmembrane helix	24	36.3636	0.0969666	EPHB6, KCNK5, PDGFRB, MSR1, PDGFRA, MOXD1, PLVAP, CADM4, IL1R1, PLD4, TGFA, MS4A4E, SLC6A2, MS4A6E, MS4A4A, TGFBR3, MS4A6A, EFNB1, CLEC6A, CD300LF, CLEC2D, WLS, TLR2, CDON	66	5634	20581	1.32836	1	0.828526	0.80755
UP_KEYWORDS	Transmembrane	24	36.3636	0.0996328	EPHB6, KCNK5, PDGFRB, MSR1, PDGFRA, MOXD1, PLVAP, CADM4, IL1R1, PLD4, TGFA, MS4A4E, SLC6A2, MS4A6E, MS4A4A, TGFBR3, MS4A6A, EFNB1, CLEC6A, CD300LF, CLEC2D, WLS, TLR2, CDON	66	5651	20581	1.32437	1	0.828526	0.80755
UP_KEYWORDS	Membrane	29	43.9394	0.161142	EPHB6, KCNK5, MOXD1, PLVAP, PLD4, TGFA, MS4A4E, SLC6A2, MS4A6E, MS4A4A, PPP3CA, EFNB1, RGS5, LBP, CD300LF, WLS, CDON, PDGFRB, MSR1, PDGFRA, CADM4, IL1R1, PLET1, TGFBR3, EHD1, MS4A6A, CLEC6A, CLEC2D, TLR2	66	7494	20581	1.20672	1	1	0.980892
GOTERM_CC_DIRECT	GO:0005886~plasma membrane	19	28.7879	0.180958	EPHB6, PDGFRB, MSR1, PDGFRA, ANGPT1, IL1R1, TGFA, SLC6A2, ENO3, EHD1, RGS5, EFNB1, BAIAP2L1, CLEC6A, CD300LF, CLEC2D, WLS, TLR2, CDON	65	4121	18224	1.29265	1	0.933904	0.882021
UP_KEYWORDS	Cell membrane	14	21.2121	0.194268	PDGFRB, PDGFRA, PLVAP, IL1R1, TGFA, PLET1, SLC6A2, TGFBR3, EHD1, PPP3CA, CD300LF, CLEC2D, WLS, CDON	66	3175	20581	1.37501	1	1	0.980892
GOTERM_CC_DIRECT	GO:0016021~integral component of membrane	20	30.303	0.451422	EPHB6, KCNK5, PDGFRB, MSR1, MOXD1, PLVAP, IL1R1, PLD4, TGFA, MS4A4E, SLC6A2, MS4A6E, MS4A4A, TGFBR3, MS4A6A, CLEC6A, CD300LF, CLEC2D, WLS, TLR2	65	5163	18224	1.08607	1	1	0.953271
Annotation Cluster 5	Enrichment Score: 1.5169218409012697
Category	Term	Count	%	PValue	Genes	List Total	Pop Hits	Pop Total	Fold Enrichment	Bonferroni	Benjamini	FDR
GOTERM_CC_DIRECT	GO:0005623~cell	4	6.06061	0.00524213	EGLN1, CCL7, PRDX1, CP	65	100	18224	11.2148	0.433138	0.0707688	0.0668372
GOTERM_MF_DIRECT	GO:0005507~copper ion binding	3	4.54545	0.0153506	MOXD1, SOD3, CP	58	56	16881	15.5921	0.947093	0.347148	0.347148
UP_KEYWORDS	Copper	3	4.54545	0.0179776	MOXD1, SOD3, CP	66	65	20581	14.3923	0.943091	0.355058	0.346069
UP_KEYWORDS	Oxidoreductase	5	7.57576	0.111827	EGLN1, MOXD1, PRDX1, SOD3, CP	66	582	20581	2.67898	1	0.88343	0.861064
GOTERM_BP_DIRECT	GO:0055114~oxidation-reduction process	5	7.57576	0.160872	EGLN1, MOXD1, PRDX1, SOD3, CP	61	592	16792	2.32499	1	1	1
Annotation Cluster 6	Enrichment Score: 1.2812322264233853
Category	Term	Count	%	PValue	Genes	List Total	Pop Hits	Pop Total	Fold Enrichment	Bonferroni	Benjamini	FDR
GOTERM_BP_DIRECT	GO:0032760~positive regulation of tumor necrosis factor production	3	4.54545	0.0122415	IL23A, LBP, TLR2	61	47	16792	17.571	0.999705	0.538627	0.537811
KEGG_PATHWAY	hsa05152:Tuberculosis	4	6.06061	0.0444384	PPP3CA, IL23A, LBP, TLR2	32	177	6879	4.85805	0.987836	0.331579	0.314487
UP_KEYWORDS	Innate immunity	4	6.06061	0.0495821	IL23A, CLEC6A, LBP, TLR2	66	261	20581	4.77905	0.999676	0.602614	0.587358
UP_KEYWORDS	Immunity	5	7.57576	0.073281	IL23A, CLEC6A, LBP, CD300LF, TLR2	66	500	20581	3.11833	0.999994	0.783781	0.763939
GOTERM_BP_DIRECT	GO:0045087~innate immune response	4	6.06061	0.198576	IL23A, CLEC6A, LBP, TLR2	61	430	16792	2.56073	1	1	1
Annotation Cluster 7	Enrichment Score: 1.0118444608254582
Category	Term	Count	%	PValue	Genes	List Total	Pop Hits	Pop Total	Fold Enrichment	Bonferroni	Benjamini	FDR
GOTERM_BP_DIRECT	GO:0050729~positive regulation of inflammatory response	3	4.54545	0.0280527	CCL7, IL23A, TLR2	61	73	16792	11.3128	1	0.690211	0.689165
UP_KEYWORDS	Inflammatory response	3	4.54545	0.0833928	CCL7, IL23A, TLR2	66	152	20581	6.15461	0.999999	0.783781	0.763939
GOTERM_BP_DIRECT	GO:0006954~inflammatory response	3	4.54545	0.393879	CCL7, IL23A, TLR2	61	379	16792	2.17899	1	1	1
Annotation Cluster 8	Enrichment Score: 0.748037564950049
Category	Term	Count	%	PValue	Genes	List Total	Pop Hits	Pop Total	Fold Enrichment	Bonferroni	Benjamini	FDR
UP_KEYWORDS	Thiol protease	3	4.54545	0.0843309	USP43, CTSC, LGMN	66	153	20581	6.11438	0.999999	0.783781	0.763939
UP_KEYWORDS	Protease	4	6.06061	0.246404	USP43, PRSS22, CTSC, LGMN	66	544	20581	2.29289	1	1	0.980892
UP_KEYWORDS	Hydrolase	8	12.1212	0.274318	PPP3CA, USP43, ERCC1, NT5DC3, PLD4, PRSS22, CTSC, LGMN	66	1671	20581	1.49292	1	1	0.980892
Annotation Cluster 9	Enrichment Score: 0.7229935441884824
Category	Term	Count	%	PValue	Genes	List Total	Pop Hits	Pop Total	Fold Enrichment	Bonferroni	Benjamini	FDR
GOTERM_CC_DIRECT	GO:0005913~cell-cell adherens junction	4	6.06061	0.104656	EHD1, CADM4, BAIAP2L1, PRDX1	65	323	18224	3.47206	0.999993	0.807349	0.762496
GOTERM_BP_DIRECT	GO:0098609~cell-cell adhesion	3	4.54545	0.252452	EHD1, BAIAP2L1, PRDX1	61	271	16792	3.04737	1	1	1
GOTERM_MF_DIRECT	GO:0098641~cadherin binding involved in cell-cell adhesion	3	4.54545	0.256492	EHD1, BAIAP2L1, PRDX1	58	290	16881	3.01088	1	1	1
Annotation Cluster 10	Enrichment Score: 0.4090301065664076
Category	Term	Count	%	PValue	Genes	List Total	Pop Hits	Pop Total	Fold Enrichment	Bonferroni	Benjamini	FDR
INTERPRO	IPR001245:Serine-threonine/tyrosine-protein kinase catalytic domain	3	4.54545	0.0864293	EPHB6, PDGFRB, PDGFRA	66	140	18559	6.02565	1	1	1
UP_SEQ_FEATURE	domain:Protein kinase	4	6.06061	0.201844	EPHB6, PDGFRB, PDGFRA, SBK1	66	478	20063	2.54381	1	1	0.980469
INTERPRO	IPR000719:Protein kinase, catalytic domain	4	6.06061	0.243057	EPHB6, PDGFRB, PDGFRA, SBK1	66	487	18559	2.30963	1	1	1
UP_SEQ_FEATURE	binding site:ATP	4	6.06061	0.270621	PDGFRB, EHD1, PDGFRA, SBK1	66	558	20063	2.1791	1	1	0.980469
INTERPRO	IPR011009:Protein kinase-like domain	4	6.06061	0.284771	EPHB6, PDGFRB, PDGFRA, SBK1	66	531	18559	2.11824	1	1	1
UP_SEQ_FEATURE	active site:Proton acceptor	4	6.06061	0.372008	PDGFRB, PDGFRA, SBK1, ENO3	66	672	20063	1.80943	1	1	0.980469
UP_SEQ_FEATURE	nucleotide phosphate-binding region:ATP	5	7.57576	0.403288	EPHB6, PDGFRB, EHD1, PDGFRA, SBK1	66	994	20063	1.5291	1	1	0.980469
UP_KEYWORDS	ATP-binding	5	7.57576	0.648265	EPHB6, PDGFRB, EHD1, PDGFRA, SBK1	66	1391	20581	1.1209	1	1	0.980892
UP_KEYWORDS	Kinase	3	4.54545	0.679967	PDGFRB, PDGFRA, SBK1	66	735	20581	1.27279	1	1	0.980892
GOTERM_MF_DIRECT	GO:0005524~ATP binding	5	7.57576	0.755135	EPHB6, PDGFRB, EHD1, PDGFRA, SBK1	58	1495	16881	0.973417	1	1	1
UP_KEYWORDS	Nucleotide-binding	5	7.57576	0.827414	EPHB6, PDGFRB, EHD1, PDGFRA, SBK1	66	1788	20581	0.872017	1	1	0.980892
UP_KEYWORDS	Transferase	4	6.06061	0.914621	PDGFRB, PDGFRA, SBK1, PNP	66	1708	20581	0.730289	1	1	0.980892
Annotation Cluster 11	Enrichment Score: 0.3365259140575599
Category	Term	Count	%	PValue	Genes	List Total	Pop Hits	Pop Total	Fold Enrichment	Bonferroni	Benjamini	FDR
GOTERM_MF_DIRECT	GO:0008134~transcription factor binding	4	6.06061	0.0710283	JUN, ID3, TCF3, ZFPM1	58	284	16881	4.09932	0.999999	0.85206	0.85206
GOTERM_BP_DIRECT	GO:0007507~heart development	3	4.54545	0.139073	FOXC2, ID3, ZFPM1	61	183	16792	4.51277	1	1	1
GOTERM_CC_DIRECT	GO:0005667~transcription factor complex	3	4.54545	0.147322	JUN, TCF3, ZFPM1	65	193	18224	4.35807	1	0.933904	0.882021
UP_KEYWORDS	Activator	4	6.06061	0.347411	FOXC2, JUN, CSRNP2, ZFPM1	66	661	20581	1.88704	1	1	0.980892
GOTERM_MF_DIRECT	GO:0003700~transcription factor activity, sequence-specific DNA binding	5	7.57576	0.409088	FOXC2, JUN, CSRNP2, ID3, TCF3	58	961	16881	1.51432	1	1	1
GOTERM_BP_DIRECT	GO:0000122~negative regulation of transcription from RNA polymerase II promoter	4	6.06061	0.478095	FOXC2, ID3, TCF3, ZFPM1	61	720	16792	1.52933	1	1	1
GOTERM_MF_DIRECT	GO:0043565~sequence-specific DNA binding	3	4.54545	0.525766	FOXC2, JUN, CSRNP2	58	518	16881	1.68563	1	1	1
GOTERM_BP_DIRECT	GO:0006366~transcription from RNA polymerase II promoter	3	4.54545	0.551132	FOXC2, JUN, CSRNP2	61	513	16792	1.60982	1	1	1
GOTERM_BP_DIRECT	GO:0045893~positive regulation of transcription, DNA-templated	3	4.54545	0.553261	FOXC2, JUN, TCF3	61	515	16792	1.60357	1	1	1
UP_KEYWORDS	Repressor	3	4.54545	0.561623	IRF2BP1, ID3, ZFPM1	66	592	20581	1.58024	1	1	0.980892
UP_KEYWORDS	Methylation	4	6.06061	0.618503	FOXC2, USP43, IRF2BP1, TCF3	66	1001	20581	1.24609	1	1	0.980892
UP_KEYWORDS	Transcription regulation	7	10.6061	0.760109	FOXC2, JUN, CSRNP2, IRF2BP1, ID3, TCF3, ZFPM1	66	2332	20581	0.936035	1	1	0.980892
GOTERM_CC_DIRECT	GO:0005654~nucleoplasm	9	13.6364	0.78153	PPP3CA, JUN, BAIAP2L1, USP43, ERCC1, IRF2BP1, ID3, TCF3, ZFPM1	65	2784	18224	0.906366	1	1	0.953271
UP_KEYWORDS	Transcription	7	10.6061	0.783842	FOXC2, JUN, CSRNP2, IRF2BP1, ID3, TCF3, ZFPM1	66	2398	20581	0.910272	1	1	0.980892
UP_KEYWORDS	DNA-binding	6	9.09091	0.788446	FOXC2, JUN, CSRNP2, ERCC1, TCF3, ZFPM1	66	2050	20581	0.912683	1	1	0.980892
UP_KEYWORDS	Nucleus	12	18.1818	0.963039	EGLN1, PPP3CA, FOXC2, JUN, CSRNP2, ERCC1, IRF2BP1, ID3, TCF3, MEX3D, ZFPM1, NDC80	66	5244	20581	0.713577	1	1	0.980892
GOTERM_BP_DIRECT	GO:0006351~transcription, DNA-templated	4	6.06061	0.976584	IRF2BP1, ID3, TCF3, ZFPM1	61	1955	16792	0.56323	1	1	1
Annotation Cluster 12	Enrichment Score: 0.13394850943103553
Category	Term	Count	%	PValue	Genes	List Total	Pop Hits	Pop Total	Fold Enrichment	Bonferroni	Benjamini	FDR
UP_KEYWORDS	Metal-binding	13	19.697	0.485421	EGLN1, MOXD1, IRF2BP1, MEX3D, SLC6A2, ENO3, CP, SOD3, EHD1, PPP3CA, NT5DC3, S100A4, ZFPM1	66	3640	20581	1.11369	1	1	0.980892
UP_KEYWORDS	Zinc	6	9.09091	0.87733	EGLN1, PPP3CA, IRF2BP1, MEX3D, ZFPM1, SOD3	66	2348	20581	0.796848	1	1	0.980892
GOTERM_MF_DIRECT	GO:0046872~metal ion binding	5	7.57576	0.930836	NT5DC3, IRF2BP1, SLC6A2, ZFPM1, SOD3	58	2069	16881	0.703363	1	1	1
