# Supplementary material for: Reduction of Metastasis via Epigenetic Modulation in a Murine Model of Metastatic Triple Negative Breast Cancer (TNBC)
Source: Cancers (Basel). 2022 Mar 30;14(7):1753. doi: 10.3390/cancers14071753 (PMC8996906; doi:10.3390/cancers14071753)
Supplement: Supplementary file 1 [file cancers-14-01753-s001.zip › FileS3_DAVID_4SCvsVori_33DEGs.xlsx]

## Sheet: 4SC202_vs_Vori_bulk_enrichment_
Annotation Cluster 1	Enrichment Score: 1.6390978546380222
Category	Term	Count	%	PValue	Genes	List Total	Pop Hits	Pop Total	Fold Enrichment	Bonferroni	Benjamini	FDR
UP_KEYWORDS	Carbohydrate metabolism	4	12.5	0.000378003	CHST11, B3GLCT, AKT1, CHST2	32	94	20581	27.3684	0.0330888	0.0336422	0.0321302
UP_SEQ_FEATURE	topological domain:Lumenal	5	15.625	0.0043117	CHST11, B3GLCT, MAN1A1, TCIRG1, CHST2	31	450	20063	7.19104	0.386316	0.491534	0.491534
GOTERM_CC_DIRECT	GO:0000139~Golgi membrane	5	15.625	0.0120799	NDFIP1, CHST11, TGFA, MAN1A1, CHST2	29	591	18224	5.31653	0.505841	0.239155	0.239155
UP_KEYWORDS	Signal-anchor	4	12.5	0.0305233	CHST11, B3GLCT, MAN1A1, CHST2	32	455	20581	5.65412	0.936638	0.27745	0.26498
UP_KEYWORDS	Transferase	6	18.75	0.109765	CLK1, CHST11, GBE1, B3GLCT, AKT1, CHST2	32	1708	20581	2.25933	0.999968	0.751466	0.717693
UP_KEYWORDS	Golgi apparatus	4	12.5	0.121903	NDFIP1, CHST11, MAN1A1, CHST2	32	812	20581	3.16826	0.999991	0.770237	0.73562
UP_SEQ_FEATURE	mutagenesis site	5	15.625	0.417833	CHST11, B3GLCT, AKT1, TARDBP, CHST2	31	2191	20063	1.47694	1	1	1
Annotation Cluster 2	Enrichment Score: 1.550985873402716
Category	Term	Count	%	PValue	Genes	List Total	Pop Hits	Pop Total	Fold Enrichment	Bonferroni	Benjamini	FDR
UP_KEYWORDS	mRNA splicing	4	12.5	0.00689898	PRPF39, PRPF38B, LUC7L3, TARDBP	32	260	20581	9.89471	0.459973	0.27745	0.26498
UP_KEYWORDS	mRNA processing	4	12.5	0.0133892	PRPF39, PRPF38B, LUC7L3, TARDBP	32	332	20581	7.74887	0.698712	0.27745	0.26498
GOTERM_BP_DIRECT	GO:0008380~RNA splicing	3	9.375	0.0270282	PRPF38B, LUC7L3, TARDBP	27	166	16792	11.2396	0.999101	1	1
GOTERM_MF_DIRECT	GO:0044822~poly(A) RNA binding	4	12.5	0.250438	PNISR, PRPF38B, LUC7L3, TARDBP	27	1129	16881	2.21514	1	1	1
Annotation Cluster 3	Enrichment Score: 1.323495366911009
Category	Term	Count	%	PValue	Genes	List Total	Pop Hits	Pop Total	Fold Enrichment	Bonferroni	Benjamini	FDR
GOTERM_CC_DIRECT	GO:0016021~integral component of membrane	15	46.875	0.0123701	SMIM3, NDFIP1, IL1R2, B3GLCT, TGFA, LMO7, TCIRG1, TMEM233, C1ORF159, CHST11, RRNAD1, PCDHB16, MAN1A1, LRRC8B, CHST2	29	5163	18224	1.82572	0.514191	0.239155	0.239155
UP_SEQ_FEATURE	transmembrane region	14	43.75	0.0229433	SMIM3, NDFIP1, IL1R2, B3GLCT, TGFA, TCIRG1, C1ORF159, CHST11, RRNAD1, PCDHB16, MAN1A1, CCNL2, LRRC8B, CHST2	31	5056	20063	1.79207	0.9274	1	1
UP_KEYWORDS	Transmembrane helix	15	46.875	0.0253619	SMIM3, NDFIP1, IL1R2, B3GLCT, TGFA, LMO7, TCIRG1, TMEM233, C1ORF159, CHST11, RRNAD1, PCDHB16, MAN1A1, LRRC8B, CHST2	32	5634	20581	1.71234	0.898361	0.27745	0.26498
UP_KEYWORDS	Transmembrane	15	46.875	0.0260137	SMIM3, NDFIP1, IL1R2, B3GLCT, TGFA, LMO7, TCIRG1, TMEM233, C1ORF159, CHST11, RRNAD1, PCDHB16, MAN1A1, LRRC8B, CHST2	32	5651	20581	1.70719	0.904236	0.27745	0.26498
UP_KEYWORDS	Membrane	17	53.125	0.0598629	SMIM3, ERRFI1, NDFIP1, IL1R2, B3GLCT, TGFA, LMO7, TCIRG1, TMEM233, C1ORF159, CHST11, RRNAD1, PCDHB16, AKT1, MAN1A1, LRRC8B, CHST2	32	7494	20581	1.45899	0.995888	0.484345	0.462577
UP_SEQ_FEATURE	topological domain:Cytoplasmic	10	31.25	0.0603439	NDFIP1, CHST11, IL1R2, PCDHB16, B3GLCT, TGFA, MAN1A1, CCNL2, TCIRG1, CHST2	31	3456	20063	1.87267	0.999118	1	1
UP_SEQ_FEATURE	glycosylation site:N-linked (GlcNAc...)	10	31.25	0.164544	C1ORF159, CHST11, IL1R2, PCDHB16, B3GLCT, TGFA, MAN1A1, LRRC8B, CCNL2, CHST2	31	4234	20063	1.52856	1	1	1
UP_KEYWORDS	Glycoprotein	10	31.25	0.232033	C1ORF159, CHST11, IL1R2, PCDHB16, B3GLCT, AKT1, TGFA, MAN1A1, LRRC8B, CHST2	32	4551	20581	1.41322	1	1	0.965909
Annotation Cluster 4	Enrichment Score: 0.9742766838735264
Category	Term	Count	%	PValue	Genes	List Total	Pop Hits	Pop Total	Fold Enrichment	Bonferroni	Benjamini	FDR
GOTERM_CC_DIRECT	GO:0016607~nuclear speck	4	12.5	0.00353397	PNISR, LUC7L3, CCNL2, TARDBP	29	201	18224	12.5057	0.185624	0.20497	0.20497
UP_KEYWORDS	Isopeptide bond	4	12.5	0.241725	PNISR, LUC7L3, AKT1, TARDBP	32	1132	20581	2.27264	1	1	0.965909
GOTERM_CC_DIRECT	GO:0005654~nucleoplasm	7	21.875	0.248718	PNISR, LRRC45, LUC7L3, AKT1, CCNL2, TARDBP, ATF3	29	2784	18224	1.58006	1	1	1
GOTERM_MF_DIRECT	GO:0044822~poly(A) RNA binding	4	12.5	0.250438	PNISR, PRPF38B, LUC7L3, TARDBP	27	1129	16881	2.21514	1	1	1
UP_KEYWORDS	Ubl conjugation	5	15.625	0.252711	PNISR, NDFIP1, LUC7L3, AKT1, TARDBP	32	1705	20581	1.88609	1	1	0.965909
Annotation Cluster 5	Enrichment Score: 0.4062867797021215
Category	Term	Count	%	PValue	Genes	List Total	Pop Hits	Pop Total	Fold Enrichment	Bonferroni	Benjamini	FDR
GOTERM_CC_DIRECT	GO:0005654~nucleoplasm	7	21.875	0.248718	PNISR, LRRC45, LUC7L3, AKT1, CCNL2, TARDBP, ATF3	29	2784	18224	1.58006	1	1	1
UP_KEYWORDS	Nucleus	10	31.25	0.390018	CLK1, PNISR, ERRFI1, PRPF39, PRPF38B, LUC7L3, AKT1, CCNL2, TARDBP, ATF3	32	5244	20581	1.22646	1	1	0.965909
GOTERM_CC_DIRECT	GO:0005634~nucleus	9	28.125	0.622798	CLK1, ERRFI1, LUC7L3, AKT1, TGFA, LMO7, CCNL2, TARDBP, ATF3	29	5415	18224	1.04446	1	1	1
Annotation Cluster 6	Enrichment Score: 0.2940584317363021
Category	Term	Count	%	PValue	Genes	List Total	Pop Hits	Pop Total	Fold Enrichment	Bonferroni	Benjamini	FDR
UP_SEQ_FEATURE	binding site:ATP	3	9.375	0.202678	CLK1, LARS2, AKT1	31	558	20063	3.47954	1	1	1
UP_KEYWORDS	ATP-binding	3	9.375	0.629224	CLK1, LARS2, AKT1	32	1391	20581	1.38711	1	1	0.965909
GOTERM_MF_DIRECT	GO:0005524~ATP binding	3	9.375	0.683822	CLK1, LARS2, AKT1	27	1495	16881	1.25463	1	1	1
UP_KEYWORDS	Nucleotide-binding	3	9.375	0.764206	CLK1, LARS2, AKT1	32	1788	20581	1.07912	1	1	0.965909
Annotation Cluster 7	Enrichment Score: 0.23651870704108385
Category	Term	Count	%	PValue	Genes	List Total	Pop Hits	Pop Total	Fold Enrichment	Bonferroni	Benjamini	FDR
GOTERM_CC_DIRECT	GO:0005654~nucleoplasm	7	21.875	0.248718	PNISR, LRRC45, LUC7L3, AKT1, CCNL2, TARDBP, ATF3	29	2784	18224	1.58006	1	1	1
UP_KEYWORDS	Transcription regulation	3	9.375	0.880911	CCNL2, TARDBP, ATF3	32	2332	20581	0.827388	1	1	0.965909
UP_KEYWORDS	Transcription	3	9.375	0.890849	CCNL2, TARDBP, ATF3	32	2398	20581	0.804616	1	1	0.965909
Annotation Cluster 8	Enrichment Score: 0.10151671580618334
Category	Term	Count	%	PValue	Genes	List Total	Pop Hits	Pop Total	Fold Enrichment	Bonferroni	Benjamini	FDR
UP_SEQ_FEATURE	topological domain:Extracellular	5	15.625	0.615102	NDFIP1, IL1R2, PCDHB16, TGFA, CCNL2	31	2787	20063	1.16109	1	1	1
UP_SEQ_FEATURE	signal peptide	4	12.5	0.897649	C1ORF159, IL1R2, PCDHB16, TGFA	31	3346	20063	0.773692	1	1	1
UP_KEYWORDS	Signal	5	15.625	0.898248	C1ORF159, IL1R2, PCDHB16, TGFA, TCIRG1	32	4160	20581	0.773024	1	1	0.965909
