# Supplementary material for: Reduction of Metastasis via Epigenetic Modulation in a Murine Model of Metastatic Triple Negative Breast Cancer (TNBC)
Source: Cancers (Basel). 2022 Mar 30;14(7):1753. doi: 10.3390/cancers14071753 (PMC8996906; doi:10.3390/cancers14071753)
Supplement: Supplementary file 1 [file cancers-14-01753-s001.zip › FileS4_IPA_70_AllResults.xls]

## Sheet: RunData
© 2000-2021 QIAGEN. All rights reserved.
Analysis Details for My Projects->Shanta_4sc2->Meta_70 - 2021-08-17 12:18 PM
Workspace	My Projects
Project	Shanta_4sc2
Analysis	Meta_70 - 2021-08-17 12:18 PM
Date	Tue Aug 17 10:18:46 PDT 2021
Analysis ID	38716384
Analysis Settings
Cutoff before duplicate resolution	true
Resolve duplicate on	Expression logfoldchange
Color using	Expression logfoldchange
Cutoff for Expression intensity	--
Cutoff for Expression logfoldchange	--
Cutoff for Expression pvalue	--
Cutoff for Expression qvalue	--
Reference set	Ingenuity Knowledge Base (Genes Only)
Relationship to include	Direct and Indirect
Includes Endogenous Chemicals	Yes
Optional Analyses	My Pathways My List
Filter Summary
Consider only molecules and/or relationships where
(species = Rat OR Human OR Mouse) AND
(confidence = Experimentally Observed) AND
(mol. types = biologic drug OR canonical pathway OR chemical - endogenous mammalian OR chemical - endogenous non-mammalian OR chemical - kinase inhibitor OR chemical - other OR chemical - protease inhibitor OR chemical drug OR chemical reagent OR chemical toxicant OR complex OR cytokine OR disease OR enzyme OR function OR G-protein coupled receptor OR group OR growth factor OR ion channel OR kina…
Regulator Effects for My Projects->Shanta_4sc2->Meta_70 - 2021-08-17 12:18 PM
My Lists for My Projects->Shanta_4sc2->Meta_70 - 2021-08-17 12:18 PM
My Lists	-log(p-value)	Ratio	Molecules
My Pathways for My Projects->Shanta_4sc2->Meta_70 - 2021-08-17 12:18 PM
My Pathways	-log(p-value)	Ratio	Molecules

## Sheet: CanonicalPathways
Canonical Pathways for My Projects->Shanta_4sc2->Meta_70 - 2021-08-17 12:18 PM
Ingenuity Canonical Pathways	-log(p-value)	zScore	Ratio	Molecules
CCR5 Signaling in Macrophages	0		0.002	JUN
CDC42 Signaling	0		0.00174	JUN
Calcium-induced T Lymphocyte Apoptosis	0		0.00217	PPP3CA
Communication between Innate and Adaptive Immune Cells	0		0.00108	TLR2
Estrogen Receptor Signaling	0		0.00248	JUN
ICOS-ICOSL Signaling in T Helper Cells	0		0.00197	PPP3CA
NUR77 Signaling in T Lymphocytes	0		0.00195	PPP3CA
OX40 Signaling Pathway	0		0.00209	JUN
SAPK/JNK Signaling	0		0.00199	JUN
Systemic Lupus Erythematosus In B Cell Signaling Pathway	0		0.00277	JUN,PPP3CA
Systemic Lupus Erythematosus Signaling	0		0.00161	JUN
Type I Diabetes Mellitus Signaling	0		0.00196	IL1R1
Phospholipase C Signaling	0.241		0.00297	PLD4,PPP3CA
Xenobiotic Metabolism Signaling	0.251		0.00347	SOD3
Huntington's Disease Signaling	0.258		0.00356	JUN
Protein Ubiquitination Pathway	0.264		0.00364	USP43
Insulin Secretion Signaling Pathway	0.271		0.00373	TCF3
Signaling by Rho Family GTPases	0.271		0.00373	JUN
Breast Cancer Regulation by Stathmin1	0.298		0.00338	JUN,TGFA
Dendritic Cell Maturation	0.3		0.0034	IL23A,TLR2
Role of NFAT in Regulation of the Immune Response	0.3		0.0034	JUN,PPP3CA
Superpathway of Inositol Phosphate Compounds	0.314		0.00431	PPP3CA
cAMP-mediated signaling	0.318		0.00437	PPP3CA
T Cell Exhaustion Signaling Pathway	0.319		0.00353	JUN,TGFBR3
PKCθ Signaling in T Lymphocytes	0.325		0.00358	JUN,PPP3CA
Role of NFAT in Cardiac Hypertrophy	0.331		0.00455	PPP3CA
Calcium Signaling	0.337		0.00463	PPP3CA
mTOR Signaling	0.344		0.00474	PLD4
3-phosphoinositide Biosynthesis	0.358		0.00495	PPP3CA
Coronavirus Pathogenesis Pathway	0.358		0.00495	JUN
PI3K/AKT Signaling	0.363		0.00503	IL1R1
CD28 Signaling in T Helper Cells	0.363		0.00387	JUN,PPP3CA
Gap Junction Signaling	0.365		0.00505	PPP3CA
ILK Signaling	0.365		0.00505	JUN
RAR Activation	0.368		0.0051	JUN
D-myo-inositol-5-phosphate Metabolism	0.375		0.00521	PPP3CA
3-phosphoinositide Degradation	0.382		0.00532	PPP3CA
GNRH Signaling	0.382		0.00532	JUN
IL-17 Signaling	0.383		0.00535	JUN
Xenobiotic Metabolism CAR Signaling Pathway	0.383		0.00535	SOD3
Altered T Cell and B Cell Signaling in Rheumatoid Arthritis	0.388		0.00407	IL23A,TLR2
Dopamine-DARPP32 Feedback in cAMP Signaling	0.394		0.00552	PPP3CA
Th17 Activation Pathway	0.397		0.00413	IL1R1,IL23A
Tight Junction Signaling	0.4		0.00562	JUN
Erythropoietin Signaling Pathway	0.402		0.00565	JUN
D-myo-inositol (1,4,5,6)-Tetrakisphosphate Biosynthesis	0.403		0.00568	PPP3CA
D-myo-inositol (3,4,5,6)-tetrakisphosphate Biosynthesis	0.403		0.00568	PPP3CA
Androgen Signaling	0.417		0.00592	JUN
CXCR4 Signaling	0.421		0.00599	JUN
Regulation of IL-2 Expression in Activated and Anergic T Lymphocytes	0.423		0.00434	JUN,PPP3CA
HOTAIR Regulatory Pathway	0.429		0.00613	TCF3
Aryl Hydrocarbon Receptor Signaling	0.438		0.00629	JUN
Ovarian Cancer Signaling	0.44		0.00633	TCF3
Molecular Mechanisms of Cancer	0.442		0.00449	JUN,TCF3
Necroptosis Signaling Pathway	0.442		0.00637	PPP3CA
Relaxin Signaling	0.451		0.00654	JUN
NAD Signaling Pathway	0.456		0.00662	TGFA
Corticotropin Releasing Hormone Signaling	0.461		0.00671	JUN
Endocannabinoid Neuronal Synapse Pathway	0.465		0.0068	PPP3CA
Endocannabinoid Cancer Inhibition Pathway	0.475		0.00699	TCF3
RAC Signaling	0.488		0.00725	JUN
White Adipose Tissue Browning Pathway	0.493		0.00735	FOXC2
Adipogenesis pathway	0.495		0.00741	FOXC2
Protein Kinase A Signaling	0.499		0.00498	PPP3CA,TCF3
Gα12/13 Signaling	0.501		0.00752	JUN
HGF Signaling	0.503		0.00758	JUN
fMLP Signaling in Neutrophils	0.506		0.00763	PPP3CA
P2Y Purigenic Receptor Signaling Pathway	0.512		0.00775	JUN
Synaptic Long Term Potentiation	0.512		0.00775	PPP3CA
14-3-3-mediated Signaling	0.517		0.00787	JUN
GP6 Signaling Pathway	0.517		0.00787	COL6A1
Renin-Angiotensin Signaling	0.538		0.00833	JUN
Cholecystokinin/Gastrin-mediated Signaling	0.541		0.0084	JUN
Airway Pathology in Chronic Obstructive Pulmonary Disease	0.544		0.00847	IL23A
Neuroprotective Role of THOP1 in Alzheimer's Disease	0.544		0.00847	PRSS22
p38 MAPK Signaling	0.544		0.00847	IL1R1
MSP-RON Signaling In Macrophages Pathway	0.547		0.00855	JUN
Amyotrophic Lateral Sclerosis Signaling	0.554		0.0087	PPP3CA
Role of MAPK Signaling in Promoting the Pathogenesis of Influenza	0.563		0.00893	JUN
Systemic Lupus Erythematosus In T Cell Signaling Pathway	0.565		0.00469	IL23A,JUN,PPP3CA
Antioxidant Action of Vitamin C	0.567		0.00901	PLD4
B Cell Receptor Signaling	0.577		0.00477	JUN,PPP3CA,TCF3
Kinetochore Metaphase Signaling Pathway	0.587		0.00952	NDC80
IGF-1 Signaling	0.591		0.00962	JUN
NER (Nucleotide Excision Repair, Enhanced Pathway)	0.594		0.00971	ERCC1
Sumoylation Pathway	0.594		0.00971	JUN
T Cell Receptor Signaling	0.596		0.00489	JUN,PPP3CA,TCF3
UVA-Induced MAPK Signaling	0.613		0.0102	JUN
p53 Signaling	0.613		0.0102	JUN
ATM Signaling	0.617		0.0103	JUN
TGF-β Signaling	0.621		0.0104	JUN
Fcγ Receptor-mediated Phagocytosis in Macrophages and Monocytes	0.629		0.0106	PLD4
Non-Small Cell Lung Cancer Signaling	0.629		0.0106	TGFA
Acute Myeloid Leukemia Signaling	0.641		0.011	TCF3
Ceramide Signaling	0.645		0.0111	JUN
Synaptogenesis Signaling Pathway	0.653		0.00641	EFNB1,EPHB6
BMP signaling pathway	0.658		0.0115	JUN
Prolactin Signaling	0.663		0.0116	JUN
JAK/STAT Signaling	0.681		0.0122	JUN
Chemokine Signaling	0.691		0.0125	JUN
Estrogen-Dependent Breast Cancer Signaling	0.696		0.0127	JUN
Sirtuin Signaling Pathway	0.696		0.00685	JUN,SOD3
IL-7 Signaling Pathway	0.701		0.0128	JUN
Role of WNT/GSK-3β Signaling in the Pathogenesis of Influenza	0.701		0.0128	TCF3
VDR/RXR Activation	0.701		0.0128	PDGFA
Angiopoietin Signaling	0.706		0.013	ANGPT1
TREM1 Signaling	0.706		0.013	TLR2
GDNF Family Ligand-Receptor Interactions	0.711		0.0132	JUN
Macropinocytosis Signaling	0.711		0.0132	PDGFA
Neurotrophin/TRK Signaling	0.711		0.0132	JUN
Role of MAPK Signaling in Inhibiting the Pathogenesis of Influenza	0.711		0.0132	JUN
Hypoxia Signaling in the Cardiovascular System	0.721		0.0135	JUN
Basal Cell Carcinoma Signaling	0.732		0.0139	TCF3
Netrin Signaling	0.732		0.0139	PPP3CA
Agrin Interactions at Neuromuscular Junction	0.743		0.0143	JUN
GM-CSF Signaling	0.743		0.0143	PPP3CA
CD40 Signaling	0.76		0.0149	JUN
Phospholipases	0.766		0.0152	PLD4
Activation of IRF by Cytosolic Pattern Recognition Receptors	0.772		0.0154	JUN
ERB2-ERBB3 Signaling	0.772		0.0154	JUN
WNT/Ca+ pathway	0.778		0.0156	PPP3CA
Cardiac Hypertrophy Signaling	0.778		0.00775	JUN,PPP3CA
Thrombopoietin Signaling	0.785		0.0159	JUN
Sperm Motility	0.789		0.00787	PDGFRA,PDGFRB
IL-2 Signaling	0.797		0.0164	JUN
Actin Cytoskeleton Signaling	0.813		0.00816	LBP,PDGFA
MSP-RON Signaling Pathway	0.817		0.0172	TLR2
CD27 Signaling in Lymphocytes	0.824		0.0175	JUN
EGF Signaling	0.839		0.0182	JUN
Role of Cytokines in Mediating Communication between Immune Cells	0.846		0.0185	IL23A
TNFR1 Signaling	0.861		0.0192	JUN
UVB-Induced MAPK Signaling	0.861		0.0192	JUN
HER-2 Signaling in Breast Cancer	0.866		0.00881	JUN,TGFA
UVC-Induced MAPK Signaling	0.869		0.0196	JUN
FAT10 Cancer Signaling Pathway	0.877		0.02	TGFBR3
Phagosome Formation	0.879	2	0.00581	LBP,MSR1,PLD4,TLR2
nNOS Signaling in Neurons	0.902		0.0213	PPP3CA
Agranulocyte Adhesion and Diapedesis	0.908		0.00935	Ccl7,IL1R1
IL-23 Signaling Pathway	0.911		0.0217	IL23A
MIF Regulation of Innate Immunity	0.929		0.0227	JUN
Sertoli Cell-Sertoli Cell Junction Signaling	0.935		0.00971	JUN,TGFBR3
B Cell Activating Factor Signaling	0.938		0.0233	JUN
April Mediated Signaling	0.948		0.0238	JUN
Endothelin-1 Signaling	0.989		0.0105	JUN,PLD4
IL-17A Signaling in Fibroblasts	0.989		0.0263	JUN
Granulocyte Adhesion and Diapedesis	0.997		0.0106	Ccl7,IL1R1
Nucleotide Excision Repair Pathway	1.02		0.0286	ERCC1
4-1BB Signaling in T Lymphocytes	1.04		0.0294	JUN
Inhibition of Angiogenesis by TSP1	1.04		0.0294	JUN
Tumor Microenvironment Pathway	1.04		0.0112	JUN,PDGFA
CREB Signaling in Neurons	1.04	1	0.00664	PDGFRA,PDGFRB,TGFA,TGFBR3
Airway Inflammation in Asthma	1.05		0.0303	IL23A
TNFR2 Signaling	1.06		0.0312	JUN
Th1 and Th2 Activation Pathway	1.07		0.0116	JUN,TGFBR3
Gαq Signaling	1.07		0.0118	PLD4,PPP3CA
Glucocorticoid Receptor Signaling	1.08		0.00688	IL1R1,JUN,PPP3CA,TLR2
HMGB1 Signaling	1.09		0.012	IL1R1,JUN
Phagosome Maturation	1.12		0.0126	CTSC,PRDX1
Epithelial Adherens Junction Signaling	1.13		0.0127	TCF3,TGFBR3
Role of Pattern Recognition Receptors in Recognition of Bacteria and Viruses	1.14		0.0128	CLEC6A,TLR2
Apelin Liver Signaling Pathway	1.15		0.0385	PDGFRB
IL-17A Signaling in Gastric Cells	1.15		0.0385	JUN
Factors Promoting Cardiogenesis in Vertebrates	1.16		0.0132	TCF3,TGFBR3
Gluconeogenesis I	1.16		0.04	ENO3
Glycolysis I	1.16		0.04	ENO3
Cardiac Hypertrophy Signaling (Enhanced)	1.18	1	0.00743	IL1R1,JUN,PPP3CA,TGFBR3
PI3K Signaling in B Lymphocytes	1.2		0.014	JUN,PPP3CA
Apelin Endothelial Signaling Pathway	1.23		0.0144	ANGPT1,JUN
MSP-RON Signaling In Cancer Cells Pathway	1.23		0.0145	JUN,TCF3
Th2 Pathway	1.24		0.0146	JUN,TGFBR3
Axonal Guidance Signaling	1.25		0.00791	EFNB1,EPHB6,PDGFA,PPP3CA
Pancreatic Adenocarcinoma Signaling	1.3		0.0159	PLD4,TGFA
IL-15 Production	1.32		0.0163	PDGFRA,PDGFRB
Opioid Signaling Pathway	1.36		0.0109	PPP3CA,RGS5,TCF3
Neuregulin Signaling	1.36		0.0171	DCN,TGFA
Choline Biosynthesis III	1.38		0.0667	PLD4
Colorectal Cancer Metastasis Signaling	1.39		0.0112	JUN,TCF3,TLR2
Mouse Embryonic Stem Cell Pluripotency	1.45		0.0192	ID3,TCF3
NRF2-mediated Oxidative Stress Response	1.53		0.0127	JUN,PRDX1,SOD3
ERBB Signaling	1.53		0.0213	JUN,TGFA
IL-1 Signaling	1.53		0.0213	IL1R1,JUN
RANK Signaling in Osteoclasts	1.56		0.022	JUN,PPP3CA
Regulation Of The Epithelial Mesenchymal Transition In Development Pathway	1.59		0.023	S100A4,TCF3
LPS-stimulated MAPK Signaling	1.61		0.0235	JUN,LBP
Autophagy	1.64		0.0141	JUN,PPP3CA,TGFA
Superoxide Radicals Degradation	1.65		0.125	SOD3
BEX2 Signaling Pathway	1.65		0.0247	JUN,TCF3
IL-8 Signaling	1.65		0.0142	ANGPT1,JUN,PLD4
Renal Cell Carcinoma Signaling	1.66		0.025	JUN,TGFA
IL-3 Signaling	1.67		0.0253	JUN,PPP3CA
Thyroid Cancer Signaling	1.67		0.0253	JUN,TCF3
Regulation of the Epithelial-Mesenchymal Transition Pathway	1.74		0.0154	FOXC2,PDGFRB,TCF3
Ephrin B Signaling	1.75		0.0278	EFNB1,EPHB6
Clathrin-mediated Endocytosis Signaling	1.75		0.0155	LYZ,PDGFA,PPP3CA
PPARα/RXRα Activation	1.75		0.0155	IL1R1,JUN,TGFBR3
Production of Nitric Oxide and Reactive Oxygen Species in Macrophages	1.77		0.0157	JUN,LYZ,TLR2
Hepatic Cholestasis	1.78		0.0159	IL1R1,JUN,LBP
WNT/β-catenin Signaling	1.88		0.0173	JUN,TCF3,TGFBR3
PCP (Planar Cell Polarity) Pathway	1.9		0.0333	EFNB1,JUN
Senescence Pathway	1.99	1	0.0135	JUN,PPP3CA,TGFBR3,TLR2
PTEN Signaling	2.05		0.02	PDGFRA,PDGFRB,TGFBR3
iNOS Signaling	2.1		0.0426	JUN,LBP
Atherosclerosis Signaling	2.22		0.0231	LYZ,MSR1,PDGFA
IL-6 Signaling	2.24		0.0234	IL1R1,JUN,LBP
LPS/IL-1 Mediated Inhibition of RXR Function	2.25		0.016	IL1R1,JUN,LBP,SOD3
NF-κB Signaling	2.25	1.63299	0.0105	IL1R1,PDGFRA,PDGFRB,TGFA,TGFBR3,TLR2
PAK Signaling	2.33		0.0254	PDGFA,PDGFRA,PDGFRB
Sphingosine-1-phosphate Signaling	2.33		0.0254	PDGFA,PDGFRA,PDGFRB
Osteoarthritis Pathway	2.35		0.0171	DCN,IL1R1,TCF3,TLR2
Role of Osteoblasts, Osteoclasts and Chondrocytes in Rheumatoid Arthritis	2.42		0.0179	IL1R1,JUN,PPP3CA,TCF3
HIF1α Signaling	2.54	0	0.0192	EGLN1,JUN,PPP3CA,TGFA
Ephrin Receptor Signaling	2.59		0.0199	ANGPT1,EFNB1,EPHB6,PDGFA
Neuroinflammation Signaling Pathway	2.69	0.447214	0.0159	IL1R1,JUN,PPP3CA,TGFBR3,TLR2
Glioblastoma Multiforme Signaling	2.84	2	0.0234	PDGFA,PDGFRA,PDGFRB,TCF3
Toll-like Receptor Signaling	2.84		0.0385	JUN,LBP,TLR2
Human Embryonic Stem Cell Pluripotency	2.89		0.0241	PDGFA,PDGFRA,PDGFRB,TCF3
IL-10 Signaling	2.94		0.0417	IL1R1,JUN,LBP
Iron homeostasis signaling pathway	3.18		0.0288	CP,PDGFA,PDGFRA,PDGFRB
IL-12 Signaling and Production in Macrophages	3.21		0.0294	IL23A,JUN,LYZ,TLR2
Role of PKR in Interferon Induction and Antiviral Response	3.21		0.0294	JUN,MSR1,PDGFA,PDGFRB
Glioma Signaling	3.36	1	0.0323	PDGFA,PDGFRA,PDGFRB,TGFA
LXR/RXR Activation	3.38		0.0325	IL1R1,LBP,LYZ,MSR1
Role of Macrophages, Fibroblasts and Endothelial Cells in Rheumatoid Arthritis	3.49		0.0185	IL1R1,JUN,PDGFA,PPP3CA,TCF3,TLR2
Hepatic Fibrosis Signaling Pathway	3.73	1.13389	0.0167	IL1R1,JUN,PDGFA,PDGFRA,PDGFRB,TCF3,TGFBR3
Acute Phase Response Signaling	3.74	1.34164	0.027	CP,IL1R1,JUN,LBP,TCF3
PDGF Signaling	3.98	1	0.0465	JUN,PDGFA,PDGFRA,PDGFRB
STAT3 Pathway	4.38	1	0.037	IL1R1,PDGFRA,PDGFRB,TGFA,TGFBR3
Regulation Of The Epithelial Mesenchymal Transition By Growth Factors Pathway	4.75	0	0.0312	FOXC2,JUN,PDGFA,PDGFRA,PDGFRB,TCF3
PPAR Signaling	4.87	-1.34164	0.0467	IL1R1,JUN,PDGFA,PDGFRA,PDGFRB
Hepatic Fibrosis / Hepatic Stellate Cell Activation	5.88		0.0361	COL6A1,IL1R1,LBP,PDGFA,PDGFRA,PDGFRB,TGFA

## Sheet: DiseaseFunctions
Diseases and Bio Functions for My Projects->Shanta_4sc2->Meta_70 - 2021-08-17 12:18 PM
Categories	Functions	Diseases or Functions Annotation	p-Value	Predicted Activation State	Activation z-score	Notes	Bias-corrected z-score	Molecules	# Molecules
Cellular Movement	cell movement	Cell movement	2.18e-13		-0.199		-0.453	JUN,IBSP,LGMN,COL6A1,EHD1,LBP,PRDX1,S100A4,PLET1,FOXC2,IL23A,BAIAP2L1,IL1R1,EGLN1,WLS,DCN,ANGPT1,TLR2,TGFA,EFNB1,PDGFRB,MS4A4A,Ccl7,TCF3,EPHB6,PDGFRA,TGFBR3,Cd24a,ID3,MSR1,PPP3CA,LYZ,SOD3,KCNK5,CTSC,PDGFA,RGS5	37
Organismal Development	abnormal morphology	Abnormal morphology of body cavity	2.2e-13					ZFPM1,JUN,ERCC1,IBSP,LGMN,NBEAL2,PRDX1,FOXC2,IL23A,IL1R1,EGLN1,DCN,ANGPT1,TLR2,TGFA,PDGFRB,TCF3,PDGFRA,CP,TGFBR3,Cd24a,ID3,PLD4,MSR1,PPP3CA,PLVAP,CLEC6A,CTSC,PDGFA,RGS5	30
Organismal Development	morphology	Morphology of body cavity	9.43e-13					ZFPM1,JUN,ERCC1,IBSP,LGMN,NBEAL2,PRDX1,FOXC2,IL23A,IL1R1,EGLN1,DCN,ANGPT1,TLR2,TGFA,EFNB1,PDGFRB,TCF3,PDGFRA,CP,TGFBR3,Cd24a,ID3,PLD4,MSR1,PPP3CA,PLVAP,CLEC6A,CTSC,PDGFA,RGS5	31
Cellular Movement	migration	Migration of cells	1.85e-12		0.626		0.38	JUN,IBSP,LGMN,COL6A1,EHD1,LBP,PRDX1,S100A4,PLET1,FOXC2,IL23A,IL1R1,EGLN1,WLS,DCN,ANGPT1,TLR2,TGFA,EFNB1,PDGFRB,MS4A4A,Ccl7,TCF3,EPHB6,PDGFRA,TGFBR3,ID3,MSR1,PPP3CA,LYZ,KCNK5,CTSC,PDGFA,RGS5	34
Tissue Morphology	quantity	Quantity of cells	3.57e-11		0.727		0.516	JUN,ERCC1,IBSP,LGMN,NBEAL2,PRDX1,FOXC2,IL23A,IL1R1,EGLN1,Clec2d (includes others),WLS,DCN,ANGPT1,TLR2,TGFA,EFNB1,PDGFRB,Ccl7,TCF3,PDGFRA,CP,TGFBR3,SLC6A2,Cd24a,ID3,PLD4,MSR1,PPP3CA,PDGFA,RGS5	31
Cardiovascular System Development and Function, Embryonic Development, Organ Development, Organismal Development, Skeletal and Muscular System Development and Function, Tissue Development	formation	Formation of cardiac muscle	8.12e-11					ZFPM1,JUN,PDGFRB,PDGFRA,TGFBR3,EGLN1,ANGPT1,PDGFA,FOXC2	9
Organismal Development, Organismal Injury and Abnormalities	abnormal morphology	Abnormal morphology of abdomen	2.95e-10					ZFPM1,TGFA,JUN,ERCC1,PDGFRB,LGMN,PDGFRA,CP,TGFBR3,Cd24a,NBEAL2,PLD4,MSR1,PPP3CA,PRDX1,FOXC2,PLVAP,CLEC6A,DCN,PDGFA,TLR2	21
Connective Tissue Development and Function, Tissue Morphology	quantity	Quantity of connective tissue	4.32e-10		0.172		0.074	JUN,ERCC1,PDGFRB,IBSP,LGMN,NBEAL2,MSR1,PRDX1,FOXC2,IL23A,IL1R1,PLVAP,EGLN1,Clec2d (includes others),WLS,DCN,TLR2	17
Embryonic Development, Organ Development, Organismal Development, Skeletal and Muscular System Development and Function, Tissue Development	development	Development of striated muscle	1.36e-09					JUN,ZFPM1,PDGFRB,PDGFRA,TGFBR3,EGLN1,ANGPT1,PDGFA,CDON,FOXC2	10
Organismal Survival	morbidity or mortality	Morbidity or mortality	2.36e-09		-1.258		-0.673	ZFPM1,JUN,ERCC1,EHD1,PRDX1,S100A4,CDON,FOXC2,IL23A,IL1R1,EGLN1,WLS,DCN,ANGPT1,NDC80,TLR2,EFNB1,PDGFRB,TCF3,PDGFRA,TGFBR3,ID3,PLD4,MSR1,PPP3CA,CSRNP2,LYZ,SOD3,PLVAP,CLEC6A,KCNK5,Fcna,PDGFA	33
Hematological System Development and Function, Lymphoid Tissue Structure and Development, Organ Morphology, Tissue Morphology	morphology	Morphology of lymphoid organ	1.1e-08					ZFPM1,EFNB1,TCF3,LGMN,TGFBR3,Cd24a,NBEAL2,ID3,PLD4,MSR1,PRDX1,FOXC2,EGLN1,DCN	14
Cancer, Organismal Injury and Abnormalities	invasive tumor	Invasive tumor	1.19e-08		-0.956		-1.086	TGFA,JUN,ERCC1,PDGFRB,IBSP,EPHB6,PDGFRA,TGFBR3,NBEAL2,ID3,PPP3CA,S100A4,FOXC2,IL23A,IL1R1,CLEC6A,WLS,DCN,ANGPT1,PDGFA,TLR2,PCOLCE	22
Cellular Movement, Immune Cell Trafficking	migration	Leukocyte migration	1.26e-08		0.914		0.728	JUN,MS4A4A,Ccl7,LGMN,LBP,MSR1,PRDX1,S100A4,LYZ,IL23A,IL1R1,EGLN1,WLS,KCNK5,CTSC,DCN,ANGPT1,TLR2,RGS5	19
Cancer, Organismal Injury and Abnormalities	advanced malignant tumor	Advanced malignant tumor	1.26e-08		-0.759		-0.885	TGFA,JUN,ERCC1,PDGFRB,IBSP,EPHB6,PDGFRA,TGFBR3,SLC6A2,NBEAL2,ID3,PPP3CA,S100A4,FOXC2,IL23A,IL1R1,CLEC6A,WLS,PDGFA,TLR2,PCOLCE	21
Connective Tissue Development and Function, Skeletal and Muscular System Development and Function, Tissue Development	morphology	Morphology of bone	1.35e-08					EFNB1,IBSP,PDGFRA,TGFBR3,SLC6A2,MSR1,S100A4,CDON,FOXC2,IL23A,IL1R1,Clec2d (includes others),DCN,PDGFA,PCOLCE	15
Cancer, Organismal Injury and Abnormalities	metastasis	Metastasis	1.55e-08		-0.759		-0.883	TGFA,JUN,ERCC1,PDGFRB,IBSP,EPHB6,PDGFRA,TGFBR3,NBEAL2,ID3,PPP3CA,S100A4,FOXC2,IL23A,IL1R1,CLEC6A,WLS,PDGFA,TLR2,PCOLCE	20
Cellular Movement	chemotaxis	Chemotaxis	1.84e-08		0.76		0.492	JUN,PDGFRB,Ccl7,LGMN,PDGFRA,LBP,S100A4,IL23A,BAIAP2L1,IL1R1,ANGPT1,PDGFA,TLR2,RGS5	14
Hematological System Development and Function, Tissue Morphology	quantity	Quantity of blood cells	2.34e-08		-0.515		-0.654	TGFA,JUN,ERCC1,EFNB1,PDGFRB,Ccl7,TCF3,LGMN,Cd24a,NBEAL2,ID3,PLD4,PRDX1,IL23A,IL1R1,EGLN1,WLS,DCN,TLR2,RGS5	20
Embryonic Development, Organ Development, Organismal Development, Skeletal and Muscular System Development and Function, Tissue Development	formation	Formation of muscle	2.52e-08		-0.882		-0.987	JUN,ZFPM1,PDGFRB,TCF3,PDGFRA,TGFBR3,EGLN1,EHD1,ANGPT1,PDGFA,CDON,FOXC2	12
Cellular Movement, Hematological System Development and Function, Immune Cell Trafficking	cell movement	Cell movement of leukocytes	3.11e-08		0.519		0.344	JUN,MS4A4A,Ccl7,LGMN,LBP,MSR1,PRDX1,S100A4,IL23A,IL1R1,EGLN1,WLS,KCNK5,CTSC,DCN,TLR2,RGS5	17
Organismal Survival	organismal death	Organismal death	3.47e-08		-1.032		-0.449	ZFPM1,JUN,ERCC1,EHD1,S100A4,PRDX1,CDON,FOXC2,IL23A,IL1R1,EGLN1,WLS,DCN,ANGPT1,NDC80,TLR2,EFNB1,PDGFRB,TCF3,PDGFRA,TGFBR3,ID3,PLD4,MSR1,PPP3CA,CSRNP2,LYZ,SOD3,PLVAP,KCNK5,PDGFA	31
Cancer, Organismal Injury and Abnormalities	metastasis	Metastasis of cells	4.72e-08		0.004		-0.119	TGFA,PDGFRB,IBSP,EPHB6,IL1R1,PDGFRA,TGFBR3,CLEC6A,NBEAL2,S100A4,TLR2,FOXC2	12
Cell-To-Cell Signaling and Interaction, Cellular Movement	recruitment	Recruitment of cells	5.18e-08		1.845		1.664	JUN,IL23A,LYZ,SOD3,PDGFRB,Ccl7,IL1R1,CTSC,ANGPT1,S100A4,TLR2	11
Digestive System Development and Function	morphology	Morphology of digestive system	5.61e-08					ZFPM1,TGFA,JUN,ERCC1,IBSP,LGMN,CP,PPP3CA,CDON,FOXC2,IL1R1,PLVAP,WLS,DCN,PDGFA,TLR2	16
Hematological System Development and Function, Immunological Disease, Lymphoid Tissue Structure and Development, Organ Morphology, Organismal Injury and Abnormalities, Tissue Morphology	abnormal morphology	Abnormal morphology of lymphoid organ	6.81e-08					ZFPM1,TCF3,LGMN,TGFBR3,Cd24a,DCN,NBEAL2,ID3,PLD4,MSR1,PRDX1,FOXC2	12
Cellular Movement	cellular infiltration	Cellular infiltration	7.81e-08		1.125		1.074	JUN,LBP,MSR1,PRDX1,S100A4,IL23A,IL1R1,EGLN1,WLS,CTSC,DCN,PDGFA,TLR2	13
Cellular Development, Cellular Growth and Proliferation, Hematological System Development and Function, Lymphoid Tissue Structure and Development	proliferation	Proliferation of immune cells	8.51e-08		-0.596		-0.696	ERCC1,EFNB1,TCF3,EPHB6,Cd24a,EHD1,NBEAL2,ID3,PPP3CA,IL23A,IL1R1,EGLN1,Clec2d (includes others),KCNK5,DCN,TLR2	16
Organismal Injury and Abnormalities	wound	Wound	9.34e-08					PDGFRB,IL1R1,PDGFRA,WLS,NBEAL2,ANGPT1,PPP3CA,PDGFA,TLR2	9
Hematological System Development and Function, Tissue Morphology	quantity	Quantity of myeloid cells	1.15e-07		-0.933		-0.939	TGFA,ERCC1,Ccl7,LGMN,Cd24a,NBEAL2,PLD4,PRDX1,IL23A,IL1R1,EGLN1,DCN,TLR2,RGS5	14
Organismal Injury and Abnormalities	fibrosis	Fibrosis	1.19e-07		-1.553		-1.49	TGFA,JUN,PDGFRB,LGMN,PDGFRA,CP,SLC6A2,MSR1,PPP3CA,CDON,IL23A,IL1R1,DCN,ANGPT1,TLR2,RGS5	16
Cellular Function and Maintenance	homeostasis	Cellular homeostasis	1.22e-07		0.254		0.096	TGFA,JUN,EFNB1,Ccl7,TCF3,PDGFRA,CP,SLC6A2,Cd24a,ID3,PLD4,MSR1,PPP3CA,PRDX1,S100A4,FOXC2,IL23A,IL1R1,EGLN1,CLEC6A,KCNK5,DCN,ANGPT1,TLR2	24
Cancer, Gastrointestinal Disease, Organismal Injury and Abnormalities	metastatic colorectal cancer	Metastatic colorectal cancer	1.46e-07					ERCC1,PDGFRB,PDGFRA,TGFBR3,WLS,PPP3CA,PDGFA,S100A4,FOXC2,PCOLCE	10
Connective Tissue Disorders, Inflammatory Disease, Inflammatory Response, Organismal Injury and Abnormalities, Skeletal and Muscular Disorders	inflammation	Inflammation of joint	1.55e-07		-0.902		-0.936	TGFA,EFNB1,PDGFRB,Ccl7,PDGFRA,SLC6A2,LBP,MSR1,PPP3CA,PRDX1,LYZ,IL23A,SOD3,IL1R1,MS4A6A,CTSC,PDGFRL,TLR2	18
Organismal Injury and Abnormalities, Tissue Morphology	abnormal morphology	Abnormal morphology of epithelial tissue	1.77e-07					TGFA,JUN,ERCC1,PDGFRB,IBSP,IL1R1,PLVAP,CP,DCN,PDGFA,TLR2,FOXC2	12
Cell Morphology	morphology	Morphology of blood cells	1.77e-07					ZFPM1,PDGFRB,Ccl7,TCF3,LGMN,IL1R1,CP,NBEAL2,ID3,PLD4,PRDX1,TLR2	12
Organismal Injury and Abnormalities	visceromegaly	Visceromegaly	1.9e-07					ZFPM1,JUN,PDGFRB,LGMN,TGFBR3,NBEAL2,PLD4,PPP3CA,PRDX1,IL23A,IL1R1,EGLN1,CTSC,ANGPT1,PDGFA,RGS5	16
Cardiovascular System Development and Function, Embryonic Development, Organ Development, Organ Morphology, Organismal Development, Skeletal and Muscular System Development and Function, Tissue Development	morphogenesis	Morphogenesis of cardiac muscle	2.22e-07					ZFPM1,TGFBR3,EGLN1,ANGPT1,FOXC2	5
Cell-To-Cell Signaling and Interaction	activation	Activation of cells	2.24e-07		0.511		0.382	TGFA,PDGFRB,EPHB6,PDGFRA,TGFBR3,Cd24a,NBEAL2,ID3,LBP,CD300LD,PPP3CA,PRDX1,IL23A,IL1R1,ANGPT1,PDGFA,TLR2	17
Immunological Disease	systemic autoimmune syndrome	Systemic autoimmune syndrome	2.55e-07					TGFA,JUN,EFNB1,PDGFRB,Ccl7,COL6A1,SLC6A2,LBP,PLD4,PPP3CA,PRDX1,S100A4,LYZ,IL23A,SOD3,IL1R1,CLEC6A,MS4A6A,CTSC,PDGFRL,TLR2	21
Connective Tissue Development and Function, Skeletal and Muscular System Development and Function, Tissue Development	size	Size of bone	2.7e-07					IL23A,EFNB1,IBSP,IL1R1,Clec2d (includes others),SLC6A2,DCN,MSR1,S100A4,PCOLCE	10
Organismal Development	growth	Growth of organism	2.88e-07		0.266		0.076	TGFA,ERCC1,EFNB1,PDGFRA,Cd24a,ID3,PPP3CA,S100A4,CDON,LYZ,IL23A,IL1R1,EGLN1,WLS,PDGFA,TLR2	16
Cardiovascular Disease, Gastrointestinal Disease, Hematological Disease, Hepatic System Disease, Organismal Injury and Abnormalities	Budd-Chiari syndrome	Budd-Chiari syndrome	3.43e-07					PDGFRB,PDGFRA,ANGPT1,PDGFA	4
Cell-To-Cell Signaling and Interaction	binding	Binding of blood cells	3.55e-07		-0.214		-0.382	EFNB1,IL1R1,Cd24a,KCNK5,DCN,CD300LD,ANGPT1,LBP,MSR1,TLR2,RGS5	11
Cell-To-Cell Signaling and Interaction, Hematological System Development and Function, Immune Cell Trafficking	adhesion	Adhesion of immune cells	3.82e-07		0.009		-0.167	IL1R1,Cd24a,KCNK5,DCN,CD300LD,ANGPT1,LBP,MSR1,TLR2,RGS5	10
Organ Morphology, Skeletal and Muscular System Development and Function, Tissue Morphology	quantity	Quantity of muscle cells	3.89e-07		1.132		1.063	JUN,PDGFRB,IL1R1,TGFBR3,PPP3CA,TLR2,FOXC2	7
Cellular Movement	cell movement	Cell movement of myeloid cells	5.63e-07		0.611		0.434	MS4A4A,Ccl7,LGMN,LBP,MSR1,S100A4,IL23A,IL1R1,EGLN1,WLS,CTSC,TLR2,RGS5	13
Organismal Development	morphology	Morphology of head	7.09e-07					TGFA,JUN,EFNB1,PDGFRB,IBSP,PDGFRA,CP,SLC6A2,EHD1,ID3,PPP3CA,S100A4,CDON,FOXC2,IL1R1,WLS,DCN,PDGFA	18
Inflammatory Response, Organismal Injury and Abnormalities	inflammation	Inflammation of organ	8.57e-07		-1.395		-1.294	TGFA,JUN,EPHB6,LGMN,PDGFRA,SLC6A2,Cd24a,EHD1,ID3,LBP,PPP3CA,PRDX1,S100A4,LYZ,IL23A,SOD3,IL1R1,MS4A6A,DCN,ANGPT1,TLR2	21
Organismal Injury and Abnormalities	benign lesion	Benign lesion	8.77e-07	Decreased	-2.158		-2.062	TGFA,JUN,PDGFRB,ENO3,LGMN,PDGFRA,COL6A1,TGFBR3,MEX3D,PRDX1,S100A4,CTSC,DCN,ANGPT1,PDGFA,TLR2,RGS5,PCOLCE	18
Connective Tissue Disorders, Developmental Disorder, Gastrointestinal Disease, Organismal Development, Organismal Injury and Abnormalities, Skeletal and Muscular Disorders	congenital malformation	Congenital malformation of face	9.56e-07					TGFA,PDGFRB,EFNB1,PDGFRA,SLC6A2,PPP3CA,PDGFA,CDON,FOXC2	9
Cardiovascular System Development and Function, Organismal Development	vasculogenesis	Vasculogenesis	1.22e-06		-0.21		-0.362	TGFA,JUN,PDGFRB,PDGFRA,TGFBR3,ID3,FOXC2,PLVAP,EGLN1,WLS,DCN,ANGPT1,PDGFA,TLR2,RGS5	15
Cancer, Hematological Disease, Immunological Disease, Organismal Injury and Abnormalities	B cell cancer	B cell cancer	1.26e-06					ZFPM1,JUN,PDGFRB,TCF3,LGMN,PDGFRA,COL6A1,SLC6A2,EHD1,ID3,PLD4,PRSS22,PPP3CA,PRDX1,S100A4,CDON,WLS,MS4A6A,KCNK5,CTSC,NDC80,TLR2,KLC3	23
Cancer, Organismal Injury and Abnormalities	metastasis	Metastasis of tumor cell lines	1.26e-06		0.051		-0.088	IBSP,EPHB6,IL1R1,PDGFRA,TGFBR3,CLEC6A,NBEAL2,S100A4,TLR2,FOXC2	10
Connective Tissue Development and Function, Connective Tissue Disorders, Organismal Injury and Abnormalities, Skeletal and Muscular Disorders, Skeletal and Muscular System Development and Function, Tissue Development	abnormal morphology	Abnormal morphology of bone	1.38e-06					EFNB1,IBSP,PDGFRA,TGFBR3,Clec2d (includes others),DCN,PDGFA,S100A4,CDON,FOXC2,PCOLCE	11
Immunological Disease	abnormal quantity	Abnormal quantity of chemokine	1.54e-06					IL1R1,CTSC,LBP,TLR2	4
Organismal Functions, Organismal Injury and Abnormalities, Tissue Morphology	healing	Healing of wound	1.83e-06					IL1R1,PDGFRA,WLS,NBEAL2,ANGPT1,PPP3CA,PDGFA	7
Cancer, Organismal Injury and Abnormalities	benign solid tumor	Benign solid tumor	2.11e-06					TGFA,JUN,PDGFRB,ENO3,PDGFRA,COL6A1,TGFBR3,MEX3D,PRDX1,S100A4,CTSC,DCN,ANGPT1,TLR2,RGS5,PCOLCE	16
Endocrine System Disorders, Gastrointestinal Disease, Metabolic Disease, Organismal Injury and Abnormalities	diabetes mellitus	Diabetes mellitus	2.36e-06					JUN,PDGFRB,PDGFRA,CP,COL6A1,SLC6A2,PLD4,MSR1,PPP3CA,S100A4,FOXC2,LYZ,IL23A,IL1R1,CLEC6A,MS4A6A,PDGFRL,TLR2,RGS5	19
Cell-To-Cell Signaling and Interaction, Cellular Movement	recruitment	Recruitment of blood cells	2.57e-06	Increased	2.026		1.866	JUN,IL23A,LYZ,Ccl7,IL1R1,CTSC,ANGPT1,S100A4,TLR2	9
Connective Tissue Disorders, Inflammatory Disease, Organismal Injury and Abnormalities, Skeletal and Muscular Disorders	rheumatic disease	Rheumatic Disease	2.58e-06		-0.902		-0.919	TGFA,JUN,EFNB1,PDGFRB,Ccl7,PDGFRA,SLC6A2,LBP,MSR1,PPP3CA,PRDX1,LYZ,IL23A,SOD3,IL1R1,MS4A6A,CTSC,PDGFRL,TLR2	19
Metabolic Disease, Organismal Injury and Abnormalities	glucose metabolism disorder	Glucose metabolism disorder	2.62e-06		1.698		1.775	JUN,PDGFRB,PDGFRA,CP,COL6A1,SLC6A2,LBP,PLD4,MSR1,PPP3CA,S100A4,FOXC2,LYZ,IL23A,BAIAP2L1,IL1R1,CLEC6A,MS4A6A,PDGFRL,TLR2,RGS5	21
Metabolic Disease, Organismal Injury and Abnormalities	amyloidosis	Amyloidosis	2.64e-06					JUN,PDGFRB,MS4A4A,TCF3,LGMN,TGFBR3,SLC6A2,PPP3CA,PRDX1,LYZ,MS4A6A,DCN,TLR2	13
Metabolic Disease, Organismal Injury and Abnormalities	metabolism	Abnormal metabolism	2.71e-06					PDGFRB,IL1R1,PLVAP,PDGFRA,NT5DC3,CTSC,DCN,LBP,PPP3CA,TLR2	10
Hematological System Development and Function, Lymphoid Tissue Structure and Development, Organ Morphology, Organismal Development, Tissue Morphology	morphology	Morphology of spleen	2.75e-06					ZFPM1,EFNB1,LGMN,TGFBR3,EGLN1,Cd24a,NBEAL2,PLD4,MSR1,PRDX1	10
Cell Death and Survival	necrosis	Necrosis	2.86e-06		-1.513		-1.439	JUN,ERCC1,LGMN,COL6A1,LBP,PRDX1,S100A4,CDON,IL1R1,EGLN1,Clec2d (includes others),DCN,ANGPT1,NDC80,TLR2,TGFA,PDGFRB,TCF3,EPHB6,PDGFRA,TGFBR3,Cd24a,ID3,CD300LD,MSR1,PPP3CA,LYZ,SOD3,RGS5	29
Hematological System Development and Function, Organismal Development, Tissue Morphology	quantity	Quantity of blood	3.19e-06		-0.239		-0.283	JUN,ERCC1,PDGFRB,LGMN,EGLN1,WLS,NBEAL2,PRDX1	8
Gastrointestinal Disease, Organismal Injury and Abnormalities	benign oral disorder	Benign oral disorder	3.2e-06					TGFA,PDGFRB,EFNB1,Ccl7,PDGFRA,SLC6A2,CTSC,PPP3CA,PDGFA,TLR2,CDON,FOXC2	12
Cancer, Organismal Injury and Abnormalities	subcutaneous tumor	Subcutaneous tumor	3.24e-06					JUN,PDGFRB,PDGFRA,TGFBR3,COL6A1,MEX3D,CTSC,ANGPT1,PPP3CA,RGS5	10
Organismal Development, Organismal Injury and Abnormalities	abnormal morphology	Abnormal morphology of head	3.25e-06					TGFA,JUN,PDGFRB,EFNB1,IBSP,PDGFRA,CP,SLC6A2,EHD1,ID3,PPP3CA,CDON,FOXC2,IL1R1,DCN,PDGFA	16
Cancer, Organismal Injury and Abnormalities, Reproductive System Disease	HER2 negative hormone receptor negative breast cancer	HER2 negative hormone receptor negative breast cancer	3.3e-06					TGFA,JUN,PDGFRB,PDGFRA,TGFBR3,S100A4,PDGFA	7
Digestive System Development and Function, Gastrointestinal Disease	abnormal morphology	Abnormal morphology of digestive system	3.85e-06					ZFPM1,TGFA,JUN,ERCC1,IBSP,PLVAP,CP,DCN,PDGFA,TLR2,CDON,FOXC2	12
Organismal Injury and Abnormalities, Reproductive System Disease	benign pelvic disease	Benign pelvic disease	3.99e-06					JUN,PDGFRB,IL1R1,PDGFRA,COL6A1,MEX3D,SLC6A2,CTSC,DCN,ANGPT1,PDGFA,RGS5	12
Cellular Movement, Hematological System Development and Function, Immune Cell Trafficking, Inflammatory Response	cell movement	Cell movement of phagocytes	4.14e-06		0.882		0.691	IL23A,MS4A4A,Ccl7,LGMN,IL1R1,EGLN1,WLS,CTSC,LBP,S100A4,TLR2,RGS5	12
Infectious Diseases	infection	Infection of mammalia	4.29e-06		-1.025		-0.825	IL23A,IL1R1,CLEC6A,Cd24a,DCN,LBP,MSR1,Fcna,TLR2	9
Cancer, Organismal Injury and Abnormalities	metastatic solid tumor	Metastatic solid tumor	4.5e-06					JUN,ERCC1,PDGFRB,EPHB6,PDGFRA,TGFBR3,PPP3CA,S100A4,FOXC2,WLS,PDGFA,TLR2,PCOLCE	13
Cancer, Endocrine System Disorders, Organismal Injury and Abnormalities	benign neoplasm of endocrine gland	Benign neoplasm of endocrine gland	4.58e-06					TGFA,JUN,ENO3,COL6A1,DCN,PRDX1,RGS5,PCOLCE	8
Amino Acid Metabolism, Post-Translational Modification, Small Molecule Biochemistry	phosphorylation	Phosphorylation of L-amino acid	5.2e-06		0.106		-0.125	TGFA,PDGFRB,PDGFRA,SBK1,Cd24a,ANGPT1,PDGFA	7
Cardiovascular System Development and Function, Cell-To-Cell Signaling and Interaction	activation	Activation of endothelial cells	5.56e-06		1.091		0.906	ID3,ANGPT1,LBP,TLR2	4
Skeletal and Muscular System Development and Function	quantity	Quantity of bone	5.82e-06		-1.131		-1.157	IL23A,IBSP,IL1R1,Clec2d (includes others),DCN,MSR1,FOXC2,PCOLCE	8
Cell-To-Cell Signaling and Interaction, Cellular Growth and Proliferation	stimulation	Stimulation of blood cells	6.06e-06		1		0.81	IL23A,EFNB1,IL1R1,Cd24a,S100A4,TLR2	6
Cancer, Organismal Injury and Abnormalities	neoplasia	Neoplasia of tumor cell lines	6.62e-06		-0.163		-0.3	IBSP,TCF3,EPHB6,IL1R1,PDGFRA,TGFBR3,CLEC6A,NBEAL2,S100A4,TLR2,FOXC2	11
Cellular Development, Cellular Growth and Proliferation, Hematological System Development and Function, Lymphoid Tissue Structure and Development	proliferation	Proliferation of lymphocytes	7.42e-06		-0.293		-0.383	ERCC1,EFNB1,TCF3,EPHB6,Cd24a,EHD1,ID3,PPP3CA,IL23A,IL1R1,Clec2d (includes others),KCNK5,TLR2	13
Cell-mediated Immune Response, Cellular Development, Cellular Function and Maintenance, Cellular Growth and Proliferation, Embryonic Development, Hematological System Development and Function, Hematopoiesis, Lymphoid Tissue Structure and Development, Organ Development, Organismal Development, Tissue Development	differentiation	Differentiation of CD4+ T-lymphocytes	7.5e-06		0.149		0.044	IL23A,EFNB1,TCF3,IL1R1,CLEC6A,ID3	6
Digestive System Development and Function, Hepatic System Development and Function, Organ Morphology, Organismal Development	morphology	Morphology of liver	7.66e-06					TGFA,JUN,ZFPM1,ERCC1,LGMN,IL1R1,CP,PPP3CA,TLR2	9
Connective Tissue Development and Function, Tissue Morphology	quantity	Quantity of connective tissue cells	7.78e-06		-0.063		-0.105	IL23A,PDGFRB,IBSP,IL1R1,Clec2d (includes others),DCN,MSR1,TLR2	8
Organismal Development, Organismal Injury and Abnormalities	abnormal morphology	Abnormal morphology of thoracic cavity	7.81e-06					JUN,TCF3,TGFBR3,ID3,PPP3CA,FOXC2,IL23A,IL1R1,EGLN1,CTSC,DCN,ANGPT1,PDGFA,TLR2,RGS5	15
Carbohydrate Metabolism, Small Molecule Biochemistry	degradation	Degradation of heparan sulfate	7.95e-06					SOD3,CP	2
Cellular Movement	invasion	Invasion of cells	8.02e-06		-0.953		-1.122	TGFA,JUN,IBSP,TCF3,EPHB6,LGMN,PDGFRA,TGFBR3,Cd24a,PPP3CA,S100A4,FOXC2,IL1R1,DCN,PDGFA,TLR2	16
Dermatological Diseases and Conditions, Infectious Diseases, Organismal Injury and Abnormalities	leprosy	Leprosy	8.36e-06					IL1R1,SLC6A2,MSR1,PPP3CA,TLR2	5
Cancer, Hematological Disease, Organismal Injury and Abnormalities	chronic myeloproliferative neoplasm	Chronic myeloproliferative neoplasm	8.61e-06					JUN,PDGFRB,IL1R1,PDGFRA,CP,ANGPT1,MSR1,PPP3CA	8
Dermatological Diseases and Conditions, Metabolic Disease, Organismal Injury and Abnormalities	xanthoma	Xanthoma	8.86e-06					PDGFRB,PLVAP,PDGFRA,NT5DC3	4
Inflammatory Disease	chronic inflammatory disorder	Chronic inflammatory disorder	8.88e-06					TGFA,JUN,EFNB1,Ccl7,PDGFRA,SLC6A2,LBP,PPP3CA,PRDX1,S100A4,LYZ,IL23A,IL1R1,MS4A6A,CTSC,PDGFRL,TLR2	17
Inflammatory Response	inflammation	Inflammation of absolute anatomical region	8.94e-06		-1.194		-1.097	TGFA,JUN,EPHB6,PDGFRA,Cd24a,EHD1,ID3,LBP,PPP3CA,PRDX1,S100A4,LYZ,IL23A,IL1R1,MS4A6A,DCN,ANGPT1,TLR2	18
Cardiovascular System Development and Function	morphology	Morphology of cardiovascular system	9.16e-06					JUN,PDGFRB,PDGFRA,TGFBR3,PPP3CA,FOXC2,IL23A,IL1R1,PLVAP,EGLN1,CTSC,ANGPT1,PDGFA,TLR2,RGS5	15
Cellular Movement, Hematological System Development and Function, Immune Cell Trafficking	cellular infiltration	Cellular infiltration by leukocytes	9.29e-06		1.204		1.16	IL23A,IL1R1,EGLN1,WLS,CTSC,DCN,LBP,MSR1,S100A4,TLR2	10
Cancer, Organismal Injury and Abnormalities	cancer	Cancer of cells	9.33e-06		-0.17		-0.213	ZFPM1,JUN,ERCC1,IBSP,LGMN,COL6A1,EHD1,NBEAL2,PRDX1,S100A4,CDON,PLET1,FOXC2,IL1R1,EGLN1,WLS,MS4A6A,DCN,ANGPT1,NDC80,TLR2,TGFA,PDGFRB,TCF3,EPHB6,PDGFRA,TGFBR3,SLC6A2,ID3,PLD4,MSR1,PPP3CA,PRSS22,SOD3,CLEC6A,CTSC,KCNK5,PDGFRL,USP43,KLC3,PCOLCE	41
Cancer, Hematological Disease, Immunological Disease, Organismal Injury and Abnormalities	tumorigenesis	Tumorigenesis of lymphocytes	9.48e-06		-0.289		-0.182	ZFPM1,JUN,LGMN,COL6A1,EHD1,PRDX1,S100A4,CDON,WLS,MS4A6A,DCN,NDC80,TLR2,PDGFRB,TCF3,PDGFRA,SLC6A2,ID3,PLD4,PRSS22,PPP3CA,KCNK5,CTSC,PCOLCE,KLC3	25
Organismal Injury and Abnormalities	interstitial fibrosis	Interstitial fibrosis	1.02e-05					PDGFRB,LGMN,PDGFRA,DCN,PPP3CA,TLR2	6
Cancer, Organismal Injury and Abnormalities	development	Development of benign tumor	1.03e-05					TGFA,JUN,PDGFRB,ENO3,PDGFRA,COL6A1,DCN,PRDX1,S100A4,TLR2,RGS5,PCOLCE	12
Cellular Movement, Connective Tissue Development and Function	migration	Migration of fibroblast cell lines	1.08e-05		0.651		0.526	PDGFRB,PDGFRA,COL6A1,EHD1,MSR1,FOXC2	6
Metabolic Disease, Organismal Injury and Abnormalities	disorder of lipid metabolism	Disorder of lipid metabolism	1.09e-05					PDGFRB,PLVAP,PDGFRA,NT5DC3,DCN,LBP,PPP3CA,TLR2	8
Cellular Development	differentiation	Differentiation of progenitor cells	1.13e-05		-0.21		-0.315	JUN,ZFPM1,IL23A,TCF3,IL1R1,PDGFRA,Cd24a,ID3,PLD4,CDON	10
Immunological Disease	hypersensitive reaction	Hypersensitive reaction	1.13e-05		0.577		0.503	JUN,LGMN,EPHB6,IL1R1,SLC6A2,DCN,LBP,PPP3CA,PRDX1,TLR2	10
Cellular Movement	chemotaxis	Chemotaxis of myeloid cells	1.13e-05		0.87		0.656	IL23A,Ccl7,LGMN,IL1R1,LBP,S100A4,TLR2,RGS5	8
Connective Tissue Disorders, Immunological Disease, Inflammatory Disease, Inflammatory Response, Organismal Injury and Abnormalities, Skeletal and Muscular Disorders	rheumatoid arthritis	Rheumatoid arthritis	1.15e-05					TGFA,EFNB1,Ccl7,SLC6A2,LBP,PPP3CA,PRDX1,LYZ,IL1R1,MS4A6A,CTSC,PDGFRL,TLR2	13
Organismal Injury and Abnormalities	bleeding	Bleeding	1.16e-05		-1.592		-1.307	PDGFRB,IL1R1,PDGFRA,NBEAL2,ID3,PPP3CA,PDGFA,TLR2,CDON,FOXC2	10
Cancer, Hematological Disease, Immunological Disease, Organismal Injury and Abnormalities	mature B cell malignant tumor	Mature B cell malignant tumor	1.17e-05					JUN,PDGFRB,TCF3,LGMN,PDGFRA,COL6A1,EHD1,ID3,PLD4,PPP3CA,S100A4,CDON,KCNK5,CTSC,NDC80,TLR2,KLC3	17
Organismal Injury and Abnormalities, Renal and Urological Disease	nephrotoxicity	Nephrotoxicity	1.18e-05					ERCC1,LYZ,CP,Cd24a,PPP3CA	5
Cardiovascular Disease, Cardiovascular System Development and Function	abnormal morphology	Abnormal morphology of cardiovascular system	1.21e-05					JUN,PDGFRB,TGFBR3,PPP3CA,FOXC2,IL23A,IL1R1,PLVAP,EGLN1,CTSC,ANGPT1,PDGFA,TLR2,RGS5	14
Cardiovascular Disease, Hereditary Disorder, Organismal Injury and Abnormalities	familial vascular disease	Familial vascular disease	1.27e-05					JUN,PDGFRB,TGFBR3,SLC6A2,DCN,ANGPT1,FOXC2	7
Cellular Assembly and Organization, Cellular Function and Maintenance, Organ Morphology, Skeletal and Muscular System Development and Function, Tissue Morphology	quantity	Quantity of smooth muscle cells	1.34e-05		1.103		1.117	JUN,PDGFRB,IL1R1,FOXC2	4
Cancer, Organismal Injury and Abnormalities	neoplasia	Lymphatic system tumor	1.35e-05		-0.289		-0.205	ZFPM1,JUN,ERCC1,LGMN,COL6A1,EHD1,PRDX1,S100A4,CDON,WLS,MS4A6A,DCN,NDC80,TLR2,PDGFRB,TCF3,PDGFRA,SLC6A2,ID3,PLD4,PRSS22,PPP3CA,KCNK5,CTSC,PCOLCE,KLC3	26
Cellular Movement, Hematological System Development and Function, Immune Cell Trafficking, Inflammatory Response	chemotaxis	Chemotaxis of phagocytes	1.39e-05		0.87		0.649	IL23A,Ccl7,LGMN,IL1R1,LBP,S100A4,TLR2,RGS5	8
Cancer, Immunological Disease, Organismal Injury and Abnormalities	thymus gland tumor	Thymus gland tumor	1.41e-05					ERCC1,PDGFRB,PDGFRA,DCN,ID3	5
Cell-To-Cell Signaling and Interaction	interaction	Interaction of stromal cells	1.45e-05					JUN,DCN,ANGPT1	3
Inflammatory Response	inflammation	Inflammation of body cavity	1.47e-05		-0.149		-0.028	TGFA,JUN,PDGFRA,Cd24a,ID3,LBP,PPP3CA,PRDX1,S100A4,LYZ,IL23A,IL1R1,MS4A6A,DCN,ANGPT1,TLR2	16
Hematological System Development and Function, Tissue Morphology	quantity	Quantity of leukocytes	1.52e-05		-0.35		-0.479	TGFA,EFNB1,Ccl7,TCF3,LGMN,Cd24a,ID3,PLD4,PRDX1,IL23A,IL1R1,WLS,DCN,TLR2,RGS5	15
Amino Acid Metabolism, Post-Translational Modification, Small Molecule Biochemistry	phosphorylation	Phosphorylation of L-tyrosine	1.62e-05		0.106		-0.125	TGFA,PDGFRB,PDGFRA,Cd24a,ANGPT1,PDGFA	6
Hematological Disease	polycythemia	Polycythemia	1.63e-05		0.577		0.654	ZFPM1,PDGFRB,IL1R1,PDGFRA,EGLN1,PRDX1,TLR2	7
Cellular Movement, Embryonic Development	movement	Movement of mesenchymal stem cells	1.73e-05					PDGFRB,PDGFRA,S100A4	3
Cardiovascular System Development and Function	trabeculation	Trabeculation of heart	1.73e-05					EGLN1,TGFBR3,ANGPT1	3
Cell-To-Cell Signaling and Interaction, Cellular Movement, Hematological System Development and Function, Immune Cell Trafficking	recruitment	Recruitment of leukocytes	1.83e-05		1.824		1.679	JUN,IL23A,LYZ,Ccl7,IL1R1,CTSC,S100A4,TLR2	8
Cancer, Organismal Injury and Abnormalities	benign connective or soft tissue neoplasm	Benign connective or soft tissue neoplasm	1.86e-05					JUN,PDGFRB,PDGFRA,TGFBR3,COL6A1,MEX3D,CTSC,ANGPT1,RGS5	9
Organismal Development	formation	Formation of vessel	1.88e-05		0		-0.1	JUN,PDGFRB,TGFBR3,EGLN1,WLS,ANGPT1	6
Organismal Injury and Abnormalities, Reproductive System Disease	endometriosis	Endometriosis	1.94e-05					JUN,PDGFRB,IL1R1,PDGFRA,COL6A1,SLC6A2,DCN,ANGPT1,PDGFA	9
Cell-mediated Immune Response, Cellular Development, Cellular Function and Maintenance, Cellular Growth and Proliferation, Embryonic Development, Hematological System Development and Function, Hematopoiesis, Lymphoid Tissue Structure and Development, Organ Development, Organismal Development, Tissue Development	differentiation	Differentiation of naive T lymphocytes	1.95e-05		-0.095		-0.199	IL23A,EFNB1,CLEC6A,ID3	4
Organismal Injury and Abnormalities	edema	Edema	2.09e-05		-0.873		-0.684	JUN,SOD3,EFNB1,PDGFRB,PLVAP,PDGFRA,ANGPT1,TLR2,FOXC2	9
Cellular Function and Maintenance	function	Function of blood cells	2.14e-05					IL23A,LGMN,CLEC6A,CTSC,KCNK5,NBEAL2,ID3,MSR1,S100A4,TLR2	10
Cancer, Hematological Disease, Immunological Disease, Organismal Injury and Abnormalities	non-Hodgkin disease	Non-Hodgkin lymphoma	2.16e-05					JUN,PDGFRB,TCF3,LGMN,PDGFRA,COL6A1,EHD1,ID3,PPP3CA,PRDX1,S100A4,CDON,KCNK5,DCN,TLR2,PCOLCE,KLC3	17
Cancer, Organismal Injury and Abnormalities, Reproductive System Disease	mammary tumor	Mammary tumor	2.18e-05		-1.141		-1.194	ZFPM1,JUN,IBSP,COL6A1,NBEAL2,LBP,PRDX1,S100A4,FOXC2,IL23A,BAIAP2L1,EGLN1,WLS,DCN,ANGPT1,NDC80,TGFA,PDGFRB,EPHB6,PDGFRA,CP,TGFBR3,MSR1,PPP3CA,CADM4,CTSC,PDGFA,PCOLCE	28
Organismal Injury and Abnormalities	hypertrophy	Hypertrophy	2.34e-05					JUN,PDGFRB,TGFBR3,EGLN1,CTSC,ANGPT1,PPP3CA,PDGFA,TLR2,RGS5	10
Cell-mediated Immune Response, Cellular Development, Cellular Function and Maintenance, Cellular Growth and Proliferation, Embryonic Development, Hematological System Development and Function, Hematopoiesis, Lymphoid Tissue Structure and Development, Organ Development, Organismal Development, Tissue Development	differentiation	Differentiation of Th17 cells	2.35e-05		0.418		0.319	IL23A,EFNB1,IL1R1,CLEC6A,ID3	5
Cancer, Organismal Injury and Abnormalities	multiple cancers	Multiple cancers	2.39e-05					ZFPM1,JUN,ERCC1,IBSP,COL6A1,NBEAL2,LBP,PRDX1,S100A4,FOXC2,IL23A,BAIAP2L1,EGLN1,WLS,DCN,ANGPT1,NDC80,TGFA,EFNB1,MS4A4A,PDGFRB,TCF3,EPHB6,PDGFRA,CP,TGFBR3,ID3,PLD4,MSR1,PPP3CA,CADM4,CTSC,PDGFA,PCOLCE	34
Connective Tissue Disorders, Organismal Injury and Abnormalities, Respiratory Disease	interstitial lung disease	Interstitial lung disease	2.42e-05					PDGFRB,IL1R1,PDGFRA,MSR1,PPP3CA,S100A4,TLR2	7
Cell-To-Cell Signaling and Interaction, Cellular Growth and Proliferation	stimulation	Stimulation of cells	2.42e-05		0.447		0.296	TGFA,IL23A,EFNB1,IL1R1,Cd24a,S100A4,TLR2	7
Gastrointestinal Disease, Inflammatory Disease, Inflammatory Response, Organismal Injury and Abnormalities	inflammation of the large intestine	Inflammation of the large intestine	2.43e-05		0.235		0.323	TGFA,IL23A,LYZ,IL1R1,PDGFRA,MS4A6A,ID3,LBP,PPP3CA,TLR2	10
Developmental Disorder, Hereditary Disorder, Organismal Injury and Abnormalities	familial midline defect	Familial midline defect	2.45e-05					JUN,PDGFRA,TGFBR3,PPP3CA,FOXC2	5
Cell Signaling	MAPKKK cascade	MAPKKK cascade	2.5e-05					TGFA,PDGFRB,PLVAP,PDGFRA,Cd24a,ANGPT1,PDGFA,CDON	8
Developmental Disorder, Organismal Injury and Abnormalities	midline defect	Midline defect	2.5e-05		-0.391		-0.135	TGFA,JUN,EFNB1,PDGFRA,TGFBR3,PPP3CA,PDGFA,FOXC2	8
Skeletal and Muscular Disorders	abnormality	Abnormality of limb	2.59e-05					IL23A,IBSP,PDGFRA,TGFBR3,COL6A1,EGLN1,Clec2d (includes others),SLC6A2,PCOLCE	9
Cardiovascular System Development and Function, Cell-To-Cell Signaling and Interaction	activation	Activation of vascular endothelial cells	2.81e-05					ANGPT1,ID3,TLR2	3
Cellular Development, Hematological System Development and Function, Hematopoiesis, Tissue Development	maturation	Maturation of megakaryocytes	2.81e-05					ZFPM1,PDGFRA,NBEAL2	3
Cancer, Organismal Injury and Abnormalities	fibrous tissue tumor	Fibrous tissue tumor	2.86e-05					PDGFRB,PDGFRA,COL6A1,TGFBR3,PRDX1,S100A4	6
Embryonic Development, Organismal Development	growth	Growth of embryo	2.88e-05		0.051		-0.11	TGFA,EFNB1,PDGFRA,EGLN1,WLS,Cd24a,ID3,PDGFA,S100A4,CDON	10
Connective Tissue Development and Function, Skeletal and Muscular System Development and Function, Tissue Development, Tissue Morphology	thickness	Thickness of bone tissue	2.93e-05					EFNB1,Clec2d (includes others),S100A4,PCOLCE	4
Immunological Disease	abnormal quantity	Abnormal quantity of cytokine	2.97e-05					IL23A,IL1R1,CTSC,LBP,TLR2	5
Neurological Disease	neurological disorder	Progressive neurological disorder	3.03e-05					JUN,ERCC1,PDGFRB,MS4A4A,ENO3,LGMN,PDGFRA,TGFBR3,SLC6A2,PPP3CA,PRDX1,S100A4,EGLN1,MS4A6A,DCN,TLR2	16
Cancer, Hematological Disease, Immunological Disease, Organismal Injury and Abnormalities	lymphocytic cancer	Lymphocytic cancer	3.11e-05		-0.289		-0.188	ZFPM1,JUN,LGMN,COL6A1,EHD1,PRDX1,S100A4,CDON,WLS,MS4A6A,DCN,NDC80,TLR2,PDGFRB,TCF3,PDGFRA,SLC6A2,ID3,PLD4,PRSS22,PPP3CA,KCNK5,CTSC,PCOLCE,KLC3	25
Respiratory Disease	chronic respiratory disorder	Chronic respiratory disorder	3.16e-05					LYZ,PDGFRB,IL1R1,PDGFRA,SLC6A2,LBP,PDGFA	7
Cancer, Organismal Injury and Abnormalities	neoplasia	Neoplasia of cells	3.19e-05		-1.043		-1.125	ZFPM1,JUN,ERCC1,IBSP,LGMN,COL6A1,EHD1,NBEAL2,PRDX1,S100A4,CDON,PLET1,FOXC2,IL1R1,EGLN1,WLS,MS4A6A,DCN,ANGPT1,NDC80,TLR2,TGFA,PDGFRB,TCF3,EPHB6,PDGFRA,CP,TGFBR3,SLC6A2,ID3,PLD4,MSR1,PPP3CA,PRSS22,LYZ,SOD3,CLEC6A,CTSC,KCNK5,PDGFRL,USP43,KLC3,PCOLCE	43
Cancer, Hematological Disease, Organismal Injury and Abnormalities	lymphocytic neoplasm	Lymphocytic neoplasm	3.2e-05		-0.289		-0.19	ZFPM1,JUN,LGMN,COL6A1,EHD1,PRDX1,S100A4,CDON,WLS,DCN,MS4A6A,NDC80,TLR2,PDGFRB,TCF3,PDGFRA,SLC6A2,ID3,PLD4,PRSS22,PPP3CA,KCNK5,CTSC,PCOLCE,KLC3	25
Cancer, Organismal Injury and Abnormalities, Reproductive System Disease	breast cancer	Breast cancer	3.25e-05					ZFPM1,JUN,IBSP,COL6A1,NBEAL2,LBP,PRDX1,S100A4,FOXC2,IL23A,BAIAP2L1,EGLN1,WLS,DCN,ANGPT1,NDC80,TGFA,PDGFRB,EPHB6,PDGFRA,CP,TGFBR3,PPP3CA,CADM4,CTSC,PDGFA,PCOLCE	27
Cancer, Organismal Injury and Abnormalities, Reproductive System Disease	breast or ovarian cancer	Breast or ovarian cancer	3.26e-05					ZFPM1,JUN,ERCC1,IBSP,COL6A1,NBEAL2,LBP,PRDX1,S100A4,FOXC2,IL23A,BAIAP2L1,EGLN1,WLS,DCN,ANGPT1,NDC80,TGFA,EFNB1,MS4A4A,PDGFRB,EPHB6,PDGFRA,CP,TGFBR3,ID3,PLD4,MSR1,PPP3CA,CADM4,CTSC,PDGFA,PCOLCE	33
Hematological System Development and Function, Immunological Disease, Lymphoid Tissue Structure and Development, Organ Morphology, Organismal Development, Organismal Injury and Abnormalities, Tissue Morphology	abnormal morphology	Abnormal morphology of spleen	3.31e-05					ZFPM1,LGMN,TGFBR3,Cd24a,NBEAL2,PLD4,MSR1,PRDX1	8
Cardiovascular System Development and Function, Cell Death and Survival	cell viability	Cell viability of endothelial cells	3.32e-05	Increased	2		1.906	PDGFRB,PDGFRA,ANGPT1,PDGFA	4
Cancer, Hematological Disease, Immunological Disease, Organismal Injury and Abnormalities	B-cell lymphoma	B-cell lymphoma	3.38e-05					JUN,PDGFRB,TCF3,LGMN,PDGFRA,EHD1,ID3,PPP3CA,PRDX1,S100A4,CDON,KCNK5,NDC80,TLR2,KLC3	15
Cellular Movement	cell movement	Cell movement of tumor cell lines	3.44e-05		-0.672		-0.856	TGFA,JUN,EFNB1,IBSP,TCF3,EPHB6,PDGFRA,TGFBR3,Cd24a,PPP3CA,S100A4,FOXC2,BAIAP2L1,DCN,PDGFA,TLR2	16
Protein Synthesis	quantity	Quantity of protein in blood	3.56e-05		0.682		0.713	ERCC1,BAIAP2L1,LGMN,IL1R1,PLVAP,EGLN1,Clec2d (includes others),CTSC,PLD4,TLR2	10
Connective Tissue Disorders, Organismal Injury and Abnormalities, Tissue Morphology	deterioration	Deterioration of connective tissue	3.63e-05		0		-0.023	JUN,IL23A,IL1R1,CTSC,SLC6A2,S100A4	6
Cell Death and Survival	apoptosis	Apoptosis	3.68e-05		-1.962		-1.856	JUN,ERCC1,LGMN,EHD1,PRDX1,S100A4,CDON,FOXC2,IL1R1,EGLN1,DCN,ANGPT1,NDC80,TLR2,TGFA,PDGFRB,TCF3,EPHB6,PDGFRA,TGFBR3,Cd24a,ID3,MSR1,PPP3CA,SOD3,RGS5	26
Organismal Injury and Abnormalities	pulmonary fibrosis or aplastic anemia	Pulmonary fibrosis or aplastic anemia	3.77e-05					TGFA,JUN,IL23A,PDGFRB,IL1R1,PDGFRA,MSR1,PPP3CA	8
Cellular Function and Maintenance, Hematological System Development and Function	function	Function of myeloid cells	3.82e-05					IL23A,LGMN,CLEC6A,MSR1,S100A4,TLR2	6
Lymphoid Tissue Structure and Development, Tissue Morphology	quantity	Quantity of lymphatic system cells	3.86e-05		0.24		0.089	ERCC1,EFNB1,TCF3,LGMN,Cd24a,NBEAL2,ID3,PLD4,PRDX1,IL23A,IL1R1,WLS,TLR2	13
Cellular Development, Connective Tissue Development and Function, Tissue Development	differentiation	Differentiation of connective tissue cells	3.98e-05		-0.699		-0.758	ZFPM1,JUN,IL23A,EFNB1,PDGFRA,EGLN1,TGFBR3,Clec2d (includes others),ID3,TLR2,FOXC2	11
Gastrointestinal Disease, Inflammatory Disease, Inflammatory Response, Organismal Injury and Abnormalities	experimental colitis	Experimental colitis	4.01e-05					IL23A,LYZ,IL1R1,MS4A6A,LBP,TLR2	6
Connective Tissue Development and Function, Skeletal and Muscular System Development and Function, Tissue Morphology	quantity	Quantity of bone cells	4.01e-05		-0.074		-0.091	IL23A,IBSP,IL1R1,Clec2d (includes others),DCN,MSR1	6
Cancer, Hematological Disease, Immunological Disease, Organismal Injury and Abnormalities	chronic myeloid leukemia	Chronic myeloid leukemia	4.22e-05					JUN,PDGFRB,IL1R1,PDGFRA,MSR1,PPP3CA	6
Cell-To-Cell Signaling and Interaction	adhesion	Adhesion of tumor cell lines	4.41e-05		-0.894		-1.034	JUN,EFNB1,EPHB6,Cd24a,KCNK5,DCN,ANGPT1,TLR2	8
Dermatological Diseases and Conditions, Inflammatory Disease, Inflammatory Response, Organismal Injury and Abnormalities	dermatitis	Dermatitis	4.52e-05		-0.068		-0.017	TGFA,JUN,IL23A,SOD3,LGMN,IL1R1,SLC6A2,PPP3CA,TLR2	9
Cancer, Organismal Injury and Abnormalities	fibrosarcoma	Fibrosarcoma	4.73e-05					PDGFRB,PDGFRA,S100A4,PRDX1	4
Organismal Injury and Abnormalities, Renal and Urological Disease	bleeding	Bleeding of renal glomerulus	4.75e-05					PDGFRB,FOXC2	2
Hematological System Development and Function, Lymphoid Tissue Structure and Development, Tissue Morphology	quantity	Quantity of innate-like T lymphocytes	4.75e-05					TCF3,ID3	2
Organ Morphology, Renal and Urological System Development and Function, Tissue Morphology	quantity	Quantity of mesangial cells	4.75e-05					PDGFRB,PPP3CA	2
Cancer, Hematological Disease, Organismal Injury and Abnormalities	hematologic cancer	Hematologic cancer of cells	4.82e-05		-0.289		-0.19	ZFPM1,JUN,PDGFRB,TCF3,LGMN,PDGFRA,COL6A1,SLC6A2,EHD1,ID3,PRSS22,PPP3CA,PRDX1,S100A4,CDON,WLS,KCNK5,MS4A6A,DCN,NDC80,TLR2,PCOLCE,KLC3	23
Cancer, Hematological Disease, Organismal Injury and Abnormalities	neoplasia	Neoplasia of blood cells	5.12e-05		-0.687		-0.604	ZFPM1,JUN,LGMN,COL6A1,EHD1,PRDX1,S100A4,CDON,IL1R1,WLS,MS4A6A,DCN,ANGPT1,NDC80,TLR2,PDGFRB,TCF3,PDGFRA,CP,SLC6A2,ID3,PLD4,MSR1,PRSS22,PPP3CA,LYZ,KCNK5,CTSC,PCOLCE,KLC3	30
Cancer, Hematological Disease, Immunological Disease, Organismal Injury and Abnormalities	T-cell non-Hodgkin disease	T-cell non-Hodgkin lymphoma	5.24e-05					JUN,PDGFRB,TCF3,PDGFRA,COL6A1,DCN,PPP3CA,PRDX1,TLR2,PCOLCE	10
Cellular Development	maturation	Maturation of myeloid cells	5.29e-05					ZFPM1,IL23A,PDGFRA,NBEAL2	4
Cell Signaling	protein kinase cascade	Protein kinase cascade	5.3e-05		1.982		1.864	TGFA,PDGFRB,PLVAP,PDGFRA,CLEC6A,Cd24a,ANGPT1,PDGFA,S100A4,CDON	10
Embryonic Development, Organismal Development	development	Development of body trunk	5.31e-05		1.11		0.959	ZFPM1,TGFA,JUN,PDGFRB,TCF3,PDGFRA,TGFBR3,ID3,LBP,PPP3CA,FOXC2,EGLN1,WLS,ANGPT1,PDGFA,TLR2	16
Cardiovascular System Development and Function, Hematological System Development and Function	blood pressure	Blood pressure	5.45e-05		0.563		0.586	SOD3,EFNB1,EPHB6,IL1R1,EGLN1,KCNK5,SLC6A2,RGS5	8
Cellular Function and Maintenance	function	Function of leukocytes	5.48e-05					IL23A,LGMN,CLEC6A,CTSC,KCNK5,ID3,MSR1,S100A4,TLR2	9
Cell-mediated Immune Response, Cellular Development, Cellular Function and Maintenance, Cellular Growth and Proliferation, Embryonic Development, Hematological System Development and Function, Hematopoiesis, Lymphoid Tissue Structure and Development, Organ Development, Organismal Development, Tissue Development	differentiation	Differentiation of helper T lymphocytes	5.51e-05		-0.096		-0.232	IL23A,EFNB1,TCF3,IL1R1,CLEC6A,ID3	6
Cellular Movement	cell movement	Cell movement of stem cells	5.89e-05		1.044		0.875	PDGFRB,EFNB1,PDGFRA,S100A4	4
Inflammatory Disease, Organismal Injury and Abnormalities, Respiratory Disease	fibrosis	Fibrosis of lung	5.93e-05					TGFA,JUN,IL23A,PDGFRB,IL1R1,PDGFRA,MSR1	7
Cancer, Organismal Injury and Abnormalities	extracranial solid tumor	Advanced extracranial solid tumor	6.02e-05					ERCC1,PDGFRB,EPHB6,PDGFRA,TGFBR3,WLS,PPP3CA,PDGFA,S100A4,FOXC2,PCOLCE	11
Cancer, Hematological Disease, Organismal Injury and Abnormalities	hematologic cancer	Hematologic cancer	6.14e-05		-0.665		-0.586	ZFPM1,JUN,LGMN,COL6A1,EHD1,PRDX1,S100A4,CDON,IL1R1,WLS,MS4A6A,DCN,ANGPT1,NDC80,TLR2,PDGFRB,TCF3,PDGFRA,CP,SLC6A2,ID3,PLD4,MSR1,PRSS22,PPP3CA,LYZ,KCNK5,CTSC,PCOLCE,KLC3	30
Cancer, Endocrine System Disorders, Organismal Injury and Abnormalities	nonpituitary endocrine tumor	Nonpituitary endocrine tumor	6.14e-05					IBSP,MOXD1,LGMN,MEX3D,EHD1,PRDX1,IRF2BP1,PAPLN,IL23A,SBK1,NT5DC3,MS4A6A,ANGPT1,TLR2,EFNB1,EPHB6,PDGFRA,CSRNP2,SOD3,CTSC,USP43,KLC3,PCOLCE,ZFPM1,JUN,ERCC1,COL6A1,NBEAL2,LBP,S100A4,CDON,PLET1,FOXC2,BAIAP2L1,EGLN1,WLS,DCN,NDC80,IER5L,TGFA,MS4A4A,PDGFRB,TCF3,CP,TGFBR3,SLC6A2,ID3,PLD4,MSR1,PPP3CA,PRSS22,PLVAP,KCNK5,PDGFA,RGS5	55
Cell-To-Cell Signaling and Interaction	binding	Binding of myeloid cells	6.33e-05		1.195		1.071	IL1R1,LBP,CD300LD,MSR1,TLR2,RGS5	6
Cardiovascular System Development and Function, Embryonic Development, Organ Development, Organismal Development, Tissue Development	cardiogenesis	Cardiogenesis	6.58e-05		1.446		1.354	ZFPM1,JUN,PDGFRB,PDGFRA,EGLN1,TGFBR3,ID3,ANGPT1,PDGFA,FOXC2	10
Cell-To-Cell Signaling and Interaction, Hematological System Development and Function, Immune Cell Trafficking	binding	Binding of granulocytes	6.62e-05		0.762		0.663	IL1R1,CD300LD,LBP,TLR2,RGS5	5
Cellular Development, Cellular Growth and Proliferation, Hematological System Development and Function, Hematopoiesis, Tissue Development	differentiation	Differentiation of hematopoietic progenitor cells	6.79e-05		-1.411		-1.508	JUN,ZFPM1,IL23A,TCF3,IL1R1,PDGFRA,Cd24a,PLD4	8
Cardiovascular Disease, Cardiovascular System Development and Function, Organ Morphology, Organismal Development, Organismal Injury and Abnormalities	hypertrophy	Hypertrophy of heart	6.99e-05					JUN,TGFBR3,EGLN1,CTSC,ANGPT1,PPP3CA,PDGFA,RGS5	8
Cancer, Hematological Disease, Immunological Disease, Organismal Injury and Abnormalities	lymphoma	Lymphoma	7.15e-05		-0.289		-0.178	JUN,PDGFRB,TCF3,LGMN,PDGFRA,COL6A1,EHD1,ID3,PPP3CA,PRDX1,S100A4,CDON,KCNK5,DCN,NDC80,TLR2,PCOLCE,KLC3	18
Cardiovascular System Development and Function, Tissue Morphology	morphology	Morphology of blood vessel	7.2e-05					JUN,PDGFRB,PLVAP,PDGFRA,EGLN1,ANGPT1,FOXC2	7
Cancer, Hematological Disease, Organismal Injury and Abnormalities	myeloid or lymphoid neoplasm	Myeloid or lymphoid neoplasm	7.25e-05		-0.665		-0.576	ZFPM1,JUN,LGMN,COL6A1,EHD1,PRDX1,S100A4,CDON,IL1R1,WLS,MS4A6A,DCN,ANGPT1,NDC80,TLR2,PDGFRB,TCF3,PDGFRA,CP,SLC6A2,ID3,PLD4,MSR1,PRSS22,PPP3CA,LYZ,KCNK5,CTSC,PCOLCE,KLC3	30
Endocrine System Disorders, Gastrointestinal Disease, Immunological Disease, Metabolic Disease, Organismal Injury and Abnormalities	insulin-dependent diabetes mellitus	Insulin-dependent diabetes mellitus	7.36e-05					LYZ,PDGFRB,IL1R1,CLEC6A,MS4A6A,PLD4,PPP3CA,S100A4,TLR2	9
Cardiovascular Disease, Cardiovascular System Development and Function, Organ Morphology, Organismal Development, Organismal Injury and Abnormalities	abnormal morphology	Abnormal morphology of heart	7.44e-05					JUN,IL23A,IL1R1,EGLN1,TGFBR3,CTSC,ANGPT1,PPP3CA,PDGFA,TLR2,RGS5,FOXC2	12
Neurological Disease, Organismal Injury and Abnormalities, Psychological Disorders	tauopathy	Tauopathy	7.55e-05					JUN,LYZ,MS4A4A,LGMN,TGFBR3,MS4A6A,SLC6A2,DCN,PPP3CA,PRDX1,TLR2	11
Cancer, Gastrointestinal Disease, Organismal Injury and Abnormalities	primary rectal adenocarcinoma	Primary rectal adenocarcinoma	7.59e-05					PDGFRB,PDGFRA,PPP3CA	3
Cancer, Immunological Disease, Organismal Injury and Abnormalities	thymus cancer	Thymus cancer	7.61e-05					PDGFRB,PDGFRA,DCN,ID3	4
Cell Morphology, Organ Morphology, Organismal Development, Organismal Injury and Abnormalities, Renal and Urological Disease, Renal and Urological System Development and Function	abnormal morphology	Abnormal morphology of mesangial cells	7.9e-05					PDGFRB,FOXC2	2
Cell Cycle, Gene Expression	binding	Binding of CarG box	7.9e-05					PDGFRB,IL1R1	2
Cell-To-Cell Signaling and Interaction, Cellular Growth and Proliferation, Hematological System Development and Function	stimulation	Stimulation of leukocytes	8.23e-05					IL23A,EFNB1,Cd24a,S100A4,TLR2	5
Cancer, Endocrine System Disorders, Organismal Injury and Abnormalities	aldosterone producing adrenocortical adenoma	Aldosterone producing adrenocortical adenoma	8.39e-05					JUN,COL6A1,DCN,PCOLCE	4
Hematological Disease, Immunological Disease, Organismal Injury and Abnormalities	leukocytosis	Leukocytosis	8.48e-05					ZFPM1,PDGFRB,IL1R1,PDGFRA,TLR2	5
Organismal Development	development	Development of genitourinary system	8.5e-05					TGFA,ERCC1,PDGFRB,PDGFRA,TGFBR3,EHD1,PPP3CA,FOXC2,PLVAP,IL1R1,WLS,ANGPT1,PDGFA,TLR2	14
Developmental Disorder	hypoplasia	Hypoplasia	8.82e-05		1.219		1.517	JUN,ERCC1,EFNB1,TCF3,PDGFRA,TGFBR3,ID3,PPP3CA,CDON,FOXC2	10
Connective Tissue Disorders, Organismal Injury and Abnormalities, Skeletal and Muscular Disorders, Skeletal and Muscular System Development and Function	abnormal morphology	Abnormal morphology of skeleton	8.84e-05					IBSP,EFNB1,PDGFRA,TGFBR3,Clec2d (includes others),FOXC2,PCOLCE	7
Cancer, Endocrine System Disorders, Organismal Injury and Abnormalities	endocrine gland tumor	Endocrine gland tumor	8.88e-05					IBSP,MOXD1,LGMN,MEX3D,EHD1,PRDX1,IRF2BP1,PAPLN,IL23A,SBK1,NT5DC3,MS4A6A,ANGPT1,TLR2,EFNB1,EPHB6,PDGFRA,CSRNP2,SOD3,CTSC,USP43,KLC3,PCOLCE,ZFPM1,JUN,ERCC1,COL6A1,NBEAL2,LBP,S100A4,CDON,PLET1,FOXC2,BAIAP2L1,EGLN1,WLS,DCN,NDC80,IER5L,TGFA,MS4A4A,PDGFRB,TCF3,ENO3,CP,TGFBR3,SLC6A2,ID3,PLD4,MSR1,PPP3CA,PRSS22,PLVAP,KCNK5,PDGFA,RGS5	56
Connective Tissue Development and Function, Skeletal and Muscular System Development and Function, Tissue Morphology	quantity	Quantity of osteoclasts	9e-05		-0.343		-0.35	IL23A,IBSP,IL1R1,Clec2d (includes others),MSR1	5
Cancer, Organismal Injury and Abnormalities	breast or colorectal cancer	Breast or colorectal cancer	9.09e-05		-1.953		-1.966	ZFPM1,JUN,ERCC1,IBSP,MOXD1,COL6A1,EHD1,NBEAL2,LBP,PRDX1,S100A4,IRF2BP1,CDON,PAPLN,FOXC2,IL23A,BAIAP2L1,EGLN1,WLS,DCN,ANGPT1,NDC80,TLR2,TGFA,EFNB1,PDGFRB,TCF3,EPHB6,PDGFRA,CP,TGFBR3,SLC6A2,PLD4,PPP3CA,CADM4,CSRNP2,SOD3,CTSC,KCNK5,PDGFRL,PDGFA,USP43,RGS5,KLC3,PCOLCE	45
Cellular Movement	migration	Migration of tumor cell lines	9.23e-05		0.112		-0.056	TGFA,JUN,EFNB1,IBSP,TCF3,EPHB6,PDGFRA,TGFBR3,PPP3CA,S100A4,FOXC2,DCN,PDGFA,TLR2	14
Developmental Disorder, Ophthalmic Disease, Organismal Injury and Abnormalities	congenital anomaly of eye	Congenital anomaly of eye	9.29e-05		1.91		2.131	TGFA,CP,EHD1,DCN,ID3,CDON,FOXC2	7
Cardiovascular System Development and Function, Cell Death and Survival	cell viability	Cell viability of endothelial cell lines	9.3e-05					TGFA,PDGFRB,PDGFRA	3
Inflammatory Response, Respiratory Disease	inflammation	Inflammation of respiratory system component	9.47e-05		0.968		1.014	TGFA,LYZ,IL23A,IL1R1,SLC6A2,ANGPT1,PPP3CA,PRDX1,S100A4,TLR2	10
Cardiovascular System Development and Function	morphology	Morphology of vasculature	9.62e-05					JUN,PDGFRB,PLVAP,PDGFRA,EGLN1,ANGPT1,ID3,FOXC2	8
Gastrointestinal Disease, Inflammatory Disease, Inflammatory Response, Organismal Injury and Abnormalities	colitis	Colitis	0.0001		-0.181		-0.111	IL23A,LYZ,IL1R1,PDGFRA,MS4A6A,ID3,LBP,PPP3CA,TLR2	9
Connective Tissue Disorders, Developmental Disorder, Gastrointestinal Disease, Organismal Development, Organismal Injury and Abnormalities, Skeletal and Muscular Disorders	cleft palate syndrome	Cleft palate syndrome	0.000102					TGFA,PDGFRA,PPP3CA	3
Cardiovascular System Development and Function, Organismal Development, Tissue Morphology	morphology	Morphology of aortic arch	0.000102					JUN,PDGFRA,FOXC2	3
Cancer, Gastrointestinal Disease, Organismal Injury and Abnormalities	primary colon adenocarcinoma	Primary colon adenocarcinoma	0.000102					PDGFRB,PDGFRA,PPP3CA	3
Hematological System Development and Function, Hematopoiesis, Tissue Morphology	quantity	Quantity of hematopoietic progenitor cells	0.000103		-1.848		-1.928	ERCC1,EFNB1,TCF3,LGMN,EGLN1,Cd24a,DCN,NBEAL2,PRDX1	9
Cellular Function and Maintenance	homeostasis	Homeostasis of blood cells	0.000108		0.532		0.349	JUN,IL23A,EFNB1,TCF3,IL1R1,CLEC6A,ID3,MSR1,PPP3CA,PRDX1	10
Connective Tissue Development and Function, Connective Tissue Disorders, Organ Morphology, Organismal Development, Organismal Injury and Abnormalities, Skeletal and Muscular Disorders, Skeletal and Muscular System Development and Function, Tissue Development	abnormal morphology	Abnormal morphology of femur	0.000111					IBSP,TGFBR3,Clec2d (includes others),PCOLCE	4
Skeletal and Muscular Disorders	abnormality	Abnormality of lower limb	0.000111					IBSP,TGFBR3,EGLN1,Clec2d (includes others),SLC6A2,PCOLCE	6
Cellular Development	maturation	Maturation of blood cells	0.000111		-0.83		-0.96	ZFPM1,IL23A,TCF3,PDGFRA,NBEAL2,TLR2	6
Cancer, Organismal Injury and Abnormalities, Skeletal and Muscular Disorders	leiomyomatosis	Leiomyoma	0.000113					JUN,PDGFRB,PDGFRA,MEX3D,CTSC,ANGPT1,RGS5	7
Organismal Injury and Abnormalities, Respiratory Disease	pulmonary disease	Chronic pulmonary disease	0.000114					LYZ,PDGFRB,IL1R1,PDGFRA,LBP,PDGFA	6
Connective Tissue Disorders, Dental Disease, Digestive System Development and Function, Gastrointestinal Disease, Organismal Development, Organismal Injury and Abnormalities, Skeletal and Muscular Disorders, Skeletal and Muscular System Development and Function, Tissue Morphology	abnormal morphology	Abnormal morphology of periodontal ligament	0.000118					IBSP,DCN	2
Cell Cycle, Hepatic System Development and Function	mitosis	Mitosis of hepatocytes	0.000118					JUN,TGFA	2
Cardiovascular System Development and Function, Organ Morphology, Organismal Development, Renal and Urological System Development and Function, Tissue Morphology	quantity	Quantity of glomerular capillary	0.000118					PDGFRB,FOXC2	2
Embryonic Development, Organismal Development, Tissue Development	growth	Growth of embryonic tissue	0.000119		-0.186		-0.306	TGFA,EFNB1,Cd24a,ID3,PDGFA,S100A4,CDON	7
Cardiovascular Disease, Hematological Disease, Organismal Injury and Abnormalities	anemia	Anemia	0.00012		-1.231		-1.022	JUN,ZFPM1,PDGFRB,LGMN,PDGFRA,CP,SLC6A2,PPP3CA,PRDX1	9
Cancer, Organismal Injury and Abnormalities, Reproductive System Disease	development	Development of mammary tumor	0.00012		-1.983		-1.969	TGFA,TGFBR3,MSR1,PRDX1,S100A4	5
Cancer, Hematological Disease, Immunological Disease, Organismal Injury and Abnormalities	mixed phenotype acute leukemia	Mixed phenotype acute leukemia	0.000121					LYZ,PDGFRB,PDGFRA,PPP3CA	4
Cellular Development, Cellular Growth and Proliferation, Hematological System Development and Function, Hematopoiesis, Lymphoid Tissue Structure and Development, Tissue Development	hematopoiesis	Hematopoiesis of mononuclear leukocytes	0.000123		0.338		0.184	JUN,IL23A,EFNB1,TCF3,IL1R1,CLEC6A,Cd24a,ID3,MSR1,PPP3CA,TLR2	11
Cellular Development, Cellular Growth and Proliferation, Hematological System Development and Function, Hematopoiesis, Lymphoid Tissue Structure and Development, Tissue Development	leukopoiesis	Leukopoiesis	0.000123		0.511		0.351	ZFPM1,JUN,IL23A,EFNB1,TCF3,IL1R1,CLEC6A,Cd24a,ID3,MSR1,PPP3CA,TLR2	12
Hematological System Development and Function, Inflammatory Response, Tissue Morphology	quantity	Quantity of phagocytes	0.000124		-1.52		-1.55	TGFA,IL23A,Ccl7,TCF3,IL1R1,DCN,PLD4,TLR2,RGS5	9
Hematological System Development and Function, Tissue Morphology	quantity	Quantity of mononuclear leukocytes	0.000124		0.387		0.24	IL23A,EFNB1,Ccl7,TCF3,LGMN,IL1R1,WLS,Cd24a,ID3,PLD4,PRDX1,TLR2	12
Cellular Development, Cellular Growth and Proliferation, Hematological System Development and Function, Lymphoid Tissue Structure and Development	cell proliferation	Cell proliferation of T lymphocytes	0.000125		-0.304		-0.37	IL23A,EFNB1,TCF3,EPHB6,IL1R1,Clec2d (includes others),Cd24a,EHD1,PPP3CA,TLR2	10
Cellular Development	maturation	Maturation of cells	0.000127		-0.949		-1.093	ZFPM1,IL23A,EFNB1,TCF3,PDGFRA,NBEAL2,PPP3CA,TLR2	8
Cellular Movement, Hematological System Development and Function, Immune Cell Trafficking	cell movement	Cell movement of granulocytes	0.00013		-0.266		-0.414	IL23A,IL1R1,WLS,CTSC,LBP,MSR1,TLR2,RGS5	8
Cardiovascular System Development and Function, Embryonic Development, Organ Development, Organismal Development, Tissue Development	formation	Formation of ventricular septum	0.000132					ZFPM1,TGFBR3,EGLN1,PDGFA	4
Connective Tissue Disorders, Inflammatory Disease, Inflammatory Response, Organismal Injury and Abnormalities, Skeletal and Muscular Disorders	arthritis	Active stage arthritis	0.000134					IL23A,IL1R1,PPP3CA	3
Cell-To-Cell Signaling and Interaction, Hematological System Development and Function	activation	Activation of blood cells	0.000135		-0.211		-0.304	IL23A,EPHB6,PDGFRA,Cd24a,NBEAL2,LBP,CD300LD,PPP3CA,PDGFA,PRDX1,TLR2	11
Connective Tissue Development and Function, Hematological System Development and Function, Hematopoiesis, Organismal Development, Tissue Morphology	quantity	Quantity of red blood cells	0.000136		-0.277		-0.291	JUN,ERCC1,PDGFRB,LGMN,EGLN1,PRDX1	6
Cell Morphology, Digestive System Development and Function, Gastrointestinal Disease, Hepatic System Development and Function, Hepatic System Disease, Organ Morphology, Organismal Development, Organismal Injury and Abnormalities, Tissue Morphology	abnormal morphology	Abnormal morphology of hepatocytes	0.000138					JUN,ERCC1,CP,TLR2	4
Dermatological Diseases and Conditions, Organismal Injury and Abnormalities	ulceration	Ulceration of skin	0.000138					TGFA,PDGFRB,PDGFRA,COL6A1	4
Cellular Development, Hematopoiesis, Tissue Development	differentiation	Differentiation of bone marrow cells	0.000139		-1.969		-2.069	JUN,ZFPM1,EFNB1,TCF3,IL1R1,PDGFRA	6
Cell Death and Survival, Organismal Injury and Abnormalities	necrosis	Necrosis of epithelial tissue	0.000143		0.072		0.091	TGFA,JUN,ERCC1,PDGFRB,TCF3,DCN,ANGPT1,TLR2,CDON,RGS5	10
Digestive System Development and Function, Organismal Development	morphology	Morphology of tooth	0.000143					IBSP,WLS,DCN,CDON	4
Cancer, Gastrointestinal Disease, Organismal Injury and Abnormalities	colorectal neoplasia	Colorectal tumor	0.000144		-1.982		-1.959	ZFPM1,JUN,ERCC1,IBSP,MOXD1,COL6A1,EHD1,NBEAL2,PRDX1,S100A4,IRF2BP1,CDON,PLET1,PAPLN,FOXC2,BAIAP2L1,WLS,DCN,ANGPT1,TLR2,EFNB1,PDGFRB,TCF3,EPHB6,PDGFRA,CP,TGFBR3,SLC6A2,PLD4,PPP3CA,CSRNP2,SOD3,CTSC,KCNK5,PDGFRL,PDGFA,USP43,RGS5,KLC3,PCOLCE	40
Cell Morphology	ruffling	Ruffling	0.00015					PDGFRB,EFNB1,ANGPT1,S100A4	4
Cardiovascular Disease, Cardiovascular System Development and Function, Organ Morphology, Organismal Development, Organismal Injury and Abnormalities	enlargement	Enlargement of heart	0.000151					JUN,IL23A,IL1R1,EGLN1,TGFBR3,CTSC,ANGPT1,PPP3CA,PDGFA,RGS5	10
Cell Death and Survival, DNA Replication, Recombination, and Repair	fragmentation	Fragmentation of DNA	0.000153		-1.474		-1.479	JUN,MSR1,ANGPT1,S100A4,FOXC2	5
Cardiovascular Disease, Hematological Disease, Organismal Injury and Abnormalities	thrombus	Thrombus	0.000156					PDGFRB,PDGFRA,ANGPT1,PPP3CA,PDGFA,TLR2	6
Cardiovascular System Development and Function, Organismal Development	formation	Formation of blood vessel	0.000157		0		-0.106	JUN,PDGFRB,TGFBR3,EGLN1,WLS	5
Cancer, Organismal Injury and Abnormalities	lymphoreticular neoplasm	Lymphoreticular neoplasm	0.000157		-0.665		-0.575	JUN,ERCC1,LGMN,COL6A1,EHD1,PRDX1,S100A4,CDON,IL1R1,WLS,DCN,ANGPT1,NDC80,TLR2,PDGFRB,TCF3,PDGFRA,CP,ID3,MSR1,PPP3CA,LYZ,KCNK5,PCOLCE,KLC3	25
Embryonic Development, Organismal Development	development	Development of abdomen	0.000159					ZFPM1,JUN,PDGFRB,PDGFRA,TGFBR3,LBP,ANGPT1,PPP3CA,TLR2,FOXC2	10
Connective Tissue Disorders, Developmental Disorder, Gastrointestinal Disease, Organismal Development, Organismal Injury and Abnormalities, Skeletal and Muscular Disorders	cleft palate	Cleft palate	0.000161					TGFA,EFNB1,PDGFRA,PPP3CA,FOXC2	5
Developmental Disorder	hypoplasia	Hypoplasia of organ	0.000163		0.928		1.206	ERCC1,EFNB1,TCF3,PDGFRA,TGFBR3,ID3,PPP3CA,CDON,FOXC2	9
Immunological Disease	abnormal morphology	Abnormal morphology of immune system	0.000169					Ccl7,TCF3,IL1R1,CP,ID3,PLD4,TLR2	7
Cancer, Cardiovascular Disease, Organismal Injury and Abnormalities	angiosarcoma	Angiosarcoma	0.000169					PDGFRB,PDGFRA,DCN,PRDX1	4
Cancer, Hematological Disease, Immunological Disease, Organismal Injury and Abnormalities	B-cell non-Hodgkin disease	B-cell non-Hodgkin lymphoma	0.000173					JUN,PDGFRB,TCF3,LGMN,PDGFRA,EHD1,ID3,PPP3CA,S100A4,CDON,KCNK5,TLR2,KLC3	13
Digestive System Development and Function, Organismal Development	morphology	Morphology of mouth	0.000174					IBSP,WLS,DCN,CDON,FOXC2	5
Hematological System Development and Function, Lymphoid Tissue Structure and Development, Tissue Morphology	quantity	Quantity of natural killer T lymphocytes	0.000176					TCF3,ID3,PLD4,PRDX1	4
Cell Cycle, Gene Expression	binding	Binding of protein binding site	0.000178		0.688		0.624	TGFA,JUN,PDGFRB,IL1R1,ID3,PRDX1	6
Cellular Movement, Hematological System Development and Function, Immune Cell Trafficking	cellular infiltration	Cellular infiltration by granulocytes	0.000181		0.758		0.691	IL1R1,WLS,CTSC,LBP,MSR1,TLR2	6
Hematological System Development and Function	hemostasis	Hemostasis	0.000182		-0.528		-0.59	ZFPM1,EFNB1,PDGFRA,EHD1,NBEAL2,PDGFA,TLR2	7
Organismal Survival	survival	Survival of organism	0.000186		-0.726		-0.829	IL23A,ERCC1,TCF3,IL1R1,EGLN1,CTSC,ID3,LBP,NDC80,PRDX1,TLR2,FOXC2	12
Skeletal and Muscular Disorders, Skeletal and Muscular System Development and Function	abnormal morphology	Abnormal morphology of muscle	0.000187					TGFBR3,COL6A1,EGLN1,DCN,PPP3CA,FOXC2,PCOLCE	7
Immunological Disease	allergy	Allergy	0.000196					JUN,LGMN,IL1R1,SLC6A2,ANGPT1,PPP3CA,PRDX1,TLR2	8
Cancer, Organismal Injury and Abnormalities	head and neck neoplasia	Head and neck tumor	0.000197					IBSP,MOXD1,LGMN,MEX3D,EHD1,IRF2BP1,PAPLN,IL23A,SBK1,NT5DC3,MS4A6A,ANGPT1,TLR2,EFNB1,EPHB6,PDGFRA,CADM4,CSRNP2,SOD3,CLEC6A,CTSC,PDGFRL,USP43,KLC3,PCOLCE,ZFPM1,JUN,ERCC1,COL6A1,NBEAL2,LBP,S100A4,CDON,PLET1,FOXC2,BAIAP2L1,IL1R1,EGLN1,WLS,DCN,NDC80,IER5L,TGFA,MS4A4A,PDGFRB,TCF3,ENO3,CP,TGFBR3,SLC6A2,ID3,PLD4,MSR1,PPP3CA,PRSS22,PLVAP,KCNK5,PDGFA,RGS5	59
Connective Tissue Disorders, Organismal Injury and Abnormalities, Skeletal and Muscular Disorders, Skeletal and Muscular System Development and Function	abnormal morphology	Abnormal morphology of appendicular skeleton	0.000197					IBSP,PDGFRA,TGFBR3,Clec2d (includes others),PCOLCE	5
Cardiovascular Disease, Hereditary Disorder, Organismal Injury and Abnormalities	familial cardiovascular disease	Familial cardiovascular disease	0.0002		0		0.219	JUN,PDGFRB,PLVAP,TGFBR3,SLC6A2,DCN,ANGPT1,PPP3CA,FOXC2	9
Cancer, Gastrointestinal Disease, Organismal Injury and Abnormalities	advanced rectal adenocarcinoma	Advanced rectal adenocarcinoma	0.000201					PDGFRB,PDGFRA,PPP3CA	3
Skeletal and Muscular System Development and Function	fusion	Fusion of bone	0.000213					PDGFRA,TGFBR3,PDGFA,FOXC2	4
Digestive System Development and Function	development	Development of digestive system	0.000214					JUN,IL1R1,PDGFRA,TGFBR3,WLS,LBP,PDGFA,CDON	8
Cellular Assembly and Organization, Cellular Function and Maintenance	organization	Microtubule dynamics	0.000215		0.467		0.303	JUN,EFNB1,PDGFRB,EPHB6,PDGFRA,TGFBR3,Cd24a,EHD1,PPP3CA,S100A4,FOXC2,IL1R1,ANGPT1,PDGFA,NDC80	15
Embryonic Development, Organ Development, Organismal Development, Skeletal and Muscular System Development and Function, Tissue Development	formation	Formation of smooth muscle	0.000216					PDGFRB,PDGFRA,CDON	3
Cancer, Organismal Injury and Abnormalities	ANO1 positive KIT positive PDGFRA D842 mutation negative gastrointestinal stromal tumor	ANO1 positive KIT positive PDGFRA D842 mutation negative gastrointestinal stromal tumor	0.00022					PDGFRB,PDGFRA	2
Cancer, Organismal Injury and Abnormalities	C-KIT exon 11 mutation positive gastrointestinal stromal tumor	Advanced C-KIT exon 11 mutation positive gastrointestinal stromal tumor	0.00022					PDGFRB,PDGFRA	2
Cancer, Hematological Disease, Immunological Disease, Organismal Injury and Abnormalities	chronic eosinophilic leukemia	Advanced chronic eosinophilic leukemia	0.00022					PDGFRB,PDGFRA	2
Hematological Disease, Immunological Disease	hypereosinophilic syndrome	Advanced hypereosinophilic syndrome	0.00022					PDGFRB,PDGFRA	2
Cancer, Organismal Injury and Abnormalities	gastrointestinal stromal tumor	Completely resected gastrointestinal stromal tumor	0.00022					PDGFRB,PDGFRA	2
Cancer, Hematological Disease, Organismal Injury and Abnormalities	FIP1L1-PDGFRα fusion kinase positive hematological neoplasm	FIP1L1-PDGFRα fusion kinase positive hematological neoplasm	0.00022					PDGFRB,PDGFRA	2
Cancer, Organismal Injury and Abnormalities	c-KIT exon 9 mutation positive gastrointestinal stromal tumor	Inoperable c-KIT exon 9 mutation positive gastrointestinal stromal tumor	0.00022					PDGFRB,PDGFRA	2
Cancer, Dermatological Diseases and Conditions, Organismal Injury and Abnormalities	dermatofibrosarcoma protuberans	Inoperable dermatofibrosarcoma protuberans	0.00022					PDGFRB,PDGFRA	2
Cancer, Organismal Injury and Abnormalities	KIT mutation positive PDGFRA D842X mutation negative gastrointestinal stromal tumor	KIT mutation positive PDGFRA D842X mutation negative gastrointestinal stromal tumor	0.00022					PDGFRB,PDGFRA	2
Cancer, Organismal Injury and Abnormalities	gastrointestinal stromal tumor	Localized gastrointestinal stromal tumor	0.00022					PDGFRB,PDGFRA	2
Cancer, Organismal Injury and Abnormalities	c-KIT exon 9 mutation positive gastrointestinal stromal tumor	Locally advanced c-KIT exon 9 mutation positive gastrointestinal stromal tumor	0.00022					PDGFRB,PDGFRA	2
Cancer, Organismal Injury and Abnormalities	C-KIT exon 11 mutation positive gastrointestinal stromal tumor	Metastatic C-KIT exon 11 mutation positive gastrointestinal stromal tumor	0.00022					PDGFRB,PDGFRA	2
Cancer, Organismal Injury and Abnormalities	c-KIT exon 11 mutation positive melanoma	Metastatic c-KIT exon 11 mutation positive melanoma	0.00022					PDGFRB,PDGFRA	2
Cancer, Organismal Injury and Abnormalities	c-KIT exon 13 mutation positive melanoma	Metastatic c-KIT exon 13 mutation positive melanoma	0.00022					PDGFRB,PDGFRA	2
Cancer, Organismal Injury and Abnormalities	c-KIT exon 9 mutation positive gastrointestinal stromal tumor	Metastatic c-KIT exon 9 mutation positive gastrointestinal stromal tumor	0.00022					PDGFRB,PDGFRA	2
Cancer, Dermatological Diseases and Conditions, Organismal Injury and Abnormalities	recurrent dermatofibrosarcoma protuberans	Metastatic recurrent dermatofibrosarcoma protuberans	0.00022					PDGFRB,PDGFRA	2
Cancer, Organismal Injury and Abnormalities	c-KIT positive gastrointestinal stromal tumor	Metastatic unresectable c-KIT positive gastrointestinal stromal tumor	0.00022					PDGFRB,PDGFRA	2
Cancer, Organismal Injury and Abnormalities	malignant gastrointestinal stromal tumor	Metastatic unresectable malignant gastrointestinal stromal tumor	0.00022					PDGFRB,PDGFRA	2
Cancer, Organismal Injury and Abnormalities	c-KIT mutation positive gastrointestinal stromal tumor	Nonmetastatic c-KIT mutation positive gastrointestinal stromal tumor	0.00022					PDGFRB,PDGFRA	2
Cancer, Organismal Injury and Abnormalities	PDGFRA mutation positive PDGFRA D842 mutation negative gastrointestinal stromal tumor	PDGFRA mutation positive PDGFRA D842 mutation negative gastrointestinal stromal tumor	0.00022					PDGFRB,PDGFRA	2
Cancer, Hematological Disease, Organismal Injury and Abnormalities	PDGFRB rearrangement positive myeloid/lymphoid neoplasm with eosinophilia	PDGFRB rearrangement positive myeloid/lymphoid neoplasm with eosinophilia	0.00022					PDGFRB,PDGFRA	2
Cancer, Dermatological Diseases and Conditions, Organismal Injury and Abnormalities	metastatic dermatofibrosarcoma protuberans	Recurrent metastatic dermatofibrosarcoma protuberans	0.00022					PDGFRB,PDGFRA	2
Cancer, Organismal Injury and Abnormalities, Renal and Urological Disease	renal clear cell adenocarcinoma	Recurrent renal clear cell adenocarcinoma	0.00022					PDGFRB,PDGFRA	2
Cancer, Hematological Disease, Immunological Disease, Organismal Injury and Abnormalities	acute lymphoblastic lymphoma	Refractory acute lymphoblastic lymphoma	0.00022					PDGFRB,PDGFRA	2
Cancer, Hematological Disease, Immunological Disease, Organismal Injury and Abnormalities	acute lymphoblastic lymphoma	Relapsed acute lymphoblastic lymphoma	0.00022					PDGFRB,PDGFRA	2
Cancer, Organismal Injury and Abnormalities	c-KIT exon 11 mutation positive melanoma	Unresectable c-KIT exon 11 mutation positive melanoma	0.00022					PDGFRB,PDGFRA	2
Cancer, Organismal Injury and Abnormalities	c-KIT exon 13 mutation positive melanoma	Unresectable c-KIT exon 13 mutation positive melanoma	0.00022					PDGFRB,PDGFRA	2
Cancer, Dermatological Diseases and Conditions, Organismal Injury and Abnormalities	dermatofibrosarcoma protuberans	Unresectable dermatofibrosarcoma protuberans	0.00022					PDGFRB,PDGFRA	2
Organismal Development	size	Size of body	0.000222		0.101		-0.259	TGFA,ERCC1,IBSP,LGMN,IL1R1,PLVAP,EHD1,DCN,PPP3CA,PDGFA,TLR2,CDON	12
Cancer, Organismal Injury and Abnormalities	adenoma formation	Adenoma	0.000224					TGFA,JUN,ENO3,COL6A1,DCN,PRDX1,TLR2,RGS5,PCOLCE	9
Cell-mediated Immune Response, Cellular Development, Cellular Function and Maintenance, Cellular Growth and Proliferation, Embryonic Development, Hematological System Development and Function, Hematopoiesis, Lymphoid Tissue Structure and Development, Organ Development, Organismal Development, Tissue Development	development	T cell development	0.000224		0.518		0.34	JUN,IL23A,EFNB1,TCF3,IL1R1,CLEC6A,ID3,MSR1,PPP3CA	9
Connective Tissue Disorders, Hereditary Disorder, Organismal Injury and Abnormalities	hereditary connective tissue disorder	Hereditary connective tissue disorder	0.000227					JUN,PDGFRB,SOD3,LGMN,IL1R1,PDGFRA,COL6A1,CTSC,DCN,PPP3CA,CDON	11
Cellular Function and Maintenance, Hematological System Development and Function	function	Function of macrophages	0.000228					IL23A,LGMN,CLEC6A,MSR1,TLR2	5
Cardiovascular System Development and Function, Embryonic Development, Organ Development, Organ Morphology, Organismal Development, Tissue Development	morphogenesis	Morphogenesis of ventricular septum	0.000232					ZFPM1,TGFBR3,EGLN1	3
Organ Morphology, Renal and Urological System Development and Function	quantity	Quantity of renal glomerulus	0.000232					PDGFRB,PPP3CA,FOXC2	3
Cancer, Hematological Disease, Immunological Disease, Organismal Injury and Abnormalities	precursor B-cell acute lymphoblastic leukemia	Precursor B-cell acute lymphoblastic leukemia	0.000236					ZFPM1,JUN,PDGFRB,TCF3,PDGFRA,WLS,MS4A6A,SLC6A2,PRSS22,PPP3CA	10
Cancer, Organismal Injury and Abnormalities	breast or pancreatic cancer	Breast or pancreatic cancer	0.000242					ZFPM1,JUN,ERCC1,IBSP,COL6A1,EHD1,NBEAL2,LBP,PRDX1,S100A4,CDON,FOXC2,IL23A,BAIAP2L1,SBK1,EGLN1,WLS,DCN,ANGPT1,NDC80,TGFA,EFNB1,MS4A4A,PDGFRB,EPHB6,PDGFRA,CP,TGFBR3,SLC6A2,ID3,PLD4,MSR1,PPP3CA,CADM4,CTSC,PDGFA,PCOLCE	37
Cellular Movement, Hematological System Development and Function, Immune Cell Trafficking, Inflammatory Response	cell movement	Cell movement of neutrophils	0.000245		0.056		-0.088	IL23A,IL1R1,WLS,CTSC,LBP,TLR2,RGS5	7
Embryonic Development, Endocrine System Development and Function, Organ Development, Organismal Development, Tissue Development	formation	Formation of adrenal gland	0.000249					PDGFRB,PDGFRA,TLR2	3
Cancer, Gastrointestinal Disease, Organismal Injury and Abnormalities	metastatic colon adenocarcinoma	Metastatic colon adenocarcinoma	0.000249					PDGFRB,PDGFRA,PPP3CA	3
Cancer, Gastrointestinal Disease, Organismal Injury and Abnormalities	colorectal cancer	Colorectal cancer	0.00025					ZFPM1,JUN,ERCC1,IBSP,MOXD1,COL6A1,EHD1,NBEAL2,PRDX1,S100A4,IRF2BP1,CDON,PAPLN,FOXC2,BAIAP2L1,WLS,DCN,ANGPT1,TLR2,EFNB1,PDGFRB,TCF3,EPHB6,PDGFRA,CP,TGFBR3,SLC6A2,PLD4,PPP3CA,CSRNP2,SOD3,CTSC,KCNK5,PDGFRL,PDGFA,USP43,RGS5,KLC3,PCOLCE	39
Inflammatory Disease, Inflammatory Response, Skeletal and Muscular Disorders	inflammation	Inflammation of muscle	0.000251					IL1R1,COL6A1,TGFBR3,PPP3CA,TLR2	5
Cellular Development, Cellular Growth and Proliferation, Embryonic Development, Organismal Development	proliferation	Proliferation of embryonic cells	0.000254		0.128		-0.049	PDGFRA,EGLN1,Cd24a,ID3,S100A4,PDGFA	6
Inflammatory Disease, Ophthalmic Disease, Organismal Injury and Abnormalities	uveitis	Uveitis	0.000255					JUN,IL1R1,CLEC6A,PPP3CA	4
Infectious Diseases	infection	Infection by DNA virus	0.000259					IL23A,PDGFRA,TGFBR3,SLC6A2,PPP3CA,TLR2	6
Cell-To-Cell Signaling and Interaction, Cellular Movement, Hematological System Development and Function, Immune Cell Trafficking, Inflammatory Response	recruitment	Recruitment of phagocytes	0.000259	Increased	2.202		2.067	LYZ,Ccl7,IL1R1,CTSC,S100A4,TLR2	6
Connective Tissue Disorders, Inflammatory Disease, Inflammatory Response, Organismal Injury and Abnormalities, Respiratory Disease	interstitial pneumonia	Interstitial pneumonia	0.000267					IL1R1,PPP3CA,S100A4	3
Connective Tissue Disorders, Developmental Disorder, Neurological Disease, Organismal Injury and Abnormalities, Skeletal and Muscular Disorders	spina bifida	Spina bifida	0.000267					PDGFRA,PDGFA,FOXC2	3
Cellular Movement	cellular infiltration	Cellular infiltration by myeloid cells	0.00027		0.926		0.863	IL1R1,EGLN1,WLS,CTSC,LBP,MSR1,TLR2	7
Connective Tissue Disorders, Organismal Injury and Abnormalities, Skeletal and Muscular Disorders	abnormality	Abnormality of limb bone	0.000281					IBSP,TGFBR3,Clec2d (includes others),SLC6A2,PCOLCE	5
Cancer, Organismal Injury and Abnormalities	gastrointestinal stromal tumor	High-risk gastrointestinal stromal tumor	0.000282					PDGFRB,PDGFRA	2
Cancer, Organismal Injury and Abnormalities	primary gastrointestinal stromal tumor	Primary gastrointestinal stromal tumor	0.000282					PDGFRB,PDGFRA	2
Cancer, Organismal Injury and Abnormalities	c-KIT positive gastrointestinal stromal tumor	Relapsed c-KIT positive gastrointestinal stromal tumor	0.000282					PDGFRB,PDGFRA	2
Cancer, Organismal Injury and Abnormalities, Renal and Urological Disease	sarcomatoid clear cell renal cell adenocarcinoma	Sarcomatoid clear cell renal cell adenocarcinoma	0.000282					PDGFRB,PDGFRA	2
Cancer, Connective Tissue Disorders, Organismal Injury and Abnormalities, Skeletal and Muscular Disorders	tenosynovial giant cell tumor	Symptomatic stage tenosynovial giant cell tumor	0.000282					PDGFRB,PDGFRA	2
Infectious Diseases	infection	Streptococcal infection	0.000285					LYZ,IL1R1,TLR2	3
Skeletal and Muscular System Development and Function	morphology	Morphology of muscle	0.000292					JUN,ERCC1,COL6A1,EGLN1,TGFBR3,DCN,PPP3CA,FOXC2,PCOLCE	9
Cellular Development, Cellular Growth and Proliferation, Embryonic Development, Hematological System Development and Function, Hematopoiesis, Lymphoid Tissue Structure and Development, Organ Development, Organismal Development, Tissue Development	lymphopoiesis	Lymphopoiesis	0.000294		0.366		0.201	JUN,IL23A,EFNB1,TCF3,IL1R1,CLEC6A,Cd24a,ID3,MSR1,PPP3CA	10
Cancer, Hematological Disease, Immunological Disease, Organismal Injury and Abnormalities	diffuse lymphoma	Diffuse lymphoma	0.000303					PDGFRB,TCF3,PDGFRA,KCNK5,EHD1,ID3,PPP3CA,S100A4,TLR2,CDON,KLC3	11
Connective Tissue Disorders, Hematological Disease, Organismal Injury and Abnormalities	erythrocytosis	Erythrocytosis	0.000305					PDGFRB,EGLN1,PRDX1	3
Cell Morphology, Nervous System Development and Function, Tissue Morphology	morphology	Morphology of astrocytes	0.000305					TGFA,CP,TLR2	3
Connective Tissue Disorders, Hematological Disease, Organismal Injury and Abnormalities	thrombocytopenia	Thrombocytopenia	0.000306					ZFPM1,PDGFRB,NBEAL2,PLD4,ANGPT1,PPP3CA	6
Cell Morphology	morphology	Morphology of leukocytes	0.000308					Ccl7,TCF3,IL1R1,CP,ID3,PLD4,TLR2	7
Connective Tissue Disorders, Organismal Injury and Abnormalities, Skeletal and Muscular Disorders	abnormality	Abnormality of rib	0.000324					EFNB1,PDGFRA,TGFBR3,FOXC2	4
Cancer, Hematological Disease, Immunological Disease, Organismal Injury and Abnormalities	childhood acute lymphoblastic leukemia	Relapsed childhood acute lymphoblastic leukemia	0.000325					PDGFRB,PDGFRA,PPP3CA	3
Cancer, Hematological Disease, Immunological Disease, Organismal Injury and Abnormalities	peripheral T-cell lymphoma	Peripheral T-cell lymphoma	0.000338					JUN,PDGFRB,TCF3,PDGFRA,COL6A1,PCOLCE	6
Embryonic Development, Hematological System Development and Function, Lymphoid Tissue Structure and Development, Organ Development, Organismal Development, Tissue Development	formation	Formation of lymphoid tissue	0.000338					ZFPM1,IL23A,TCF3,EGLN1,ANGPT1,ID3,FOXC2	7
Cardiovascular Disease, Organismal Injury and Abnormalities	cardiac lesion	Cardiac lesion	0.000343		-1.296		-1.232	JUN,EGLN1,PPP3CA,CDON,TLR2,RGS5	6
Cardiovascular System Development and Function	morphogenesis	Morphogenesis of cardiovascular system	0.000343					JUN,ZFPM1,TGFBR3,EGLN1,ANGPT1,FOXC2	6
Inflammatory Disease, Ophthalmic Disease, Organismal Injury and Abnormalities	ophthalmia	Ophthalmia	0.000346					IL1R1,CLEC6A,PPP3CA	3
Cell Morphology, Cellular Movement	cell spreading	Cell spreading	0.000349		-1		-1.144	EFNB1,EPHB6,Cd24a,EHD1,MSR1,PDGFA	6
Cellular Development, Cellular Growth and Proliferation	proliferation	Proliferation of myeloid cells	0.000351		-1.131		-1.189	IL1R1,EGLN1,DCN,NBEAL2,TLR2	5
Cell Death and Survival, Skeletal and Muscular System Development and Function	cell viability	Cell viability of vascular smooth muscle cells	0.000352					PDGFRB,PDGFRA	2
Hematological Disease, Hereditary Disorder, Metabolic Disease, Nutritional Disease, Organismal Injury and Abnormalities	hereditary iron overload	Hereditary iron overload	0.000352					CP,S100A4	2
Cancer, Organismal Injury and Abnormalities, Renal and Urological Disease	renal cell carcinoma	High-risk renal cell carcinoma	0.000352					PDGFRB,PDGFRA	2
Cancer, Hematological Disease, Immunological Disease, Organismal Injury and Abnormalities	chronic myeloid leukemia in lymphoid blast crisis	Imatinib resistant chronic myeloid leukemia in lymphoid blast crisis	0.000352					PDGFRB,PDGFRA	2
Cancer, Hematological Disease, Immunological Disease, Organismal Injury and Abnormalities	chronic myeloid leukemia in myeloid blast crisis	Imatinib resistant chronic myeloid leukemia in myeloid blast crisis	0.000352					PDGFRB,PDGFRA	2
Cancer, Organismal Injury and Abnormalities	metastatic gastrointestinal stromal tumor	Imatinib resistant metastatic gastrointestinal stromal tumor	0.000352					PDGFRB,PDGFRA	2
Cancer, Immunological Disease, Organismal Injury and Abnormalities	KIT mutation positive thymic carcinoma	KIT mutation positive thymic carcinoma	0.000352					PDGFRB,PDGFRA	2
Cancer, Gastrointestinal Disease, Organismal Injury and Abnormalities	KRAS mutation positive colorectal carcinoma	Locally advanced KRAS mutation positive colorectal carcinoma	0.000352					PDGFRB,PDGFRA	2
Cancer, Organismal Injury and Abnormalities	generalized gastrointestinal stromal tumor	Metastatic generalized gastrointestinal stromal tumor	0.000352					PDGFRB,PDGFRA	2
Cancer, Organismal Injury and Abnormalities, Tumor Morphology	generalized gastrointestinal stromal tumor	Progressive generalized gastrointestinal stromal tumor	0.000352					PDGFRB,PDGFRA	2
Cardiovascular Disease, Dermatological Diseases and Conditions, Organismal Injury and Abnormalities	stasis ulcer	Stasis ulcer	0.000352					PDGFRB,PDGFRA	2
Cancer, Endocrine System Disorders, Gastrointestinal Disease, Organismal Injury and Abnormalities	locally advanced neuroendocrine tumor of pancreatic origin	Well-differentiated locally advanced neuroendocrine tumor of pancreatic origin	0.000352					PDGFRB,PDGFRA	2
Hematological System Development and Function, Lymphoid Tissue Structure and Development, Tissue Morphology	quantity	Quantity of lymphocytes	0.000354		0.257		0.107	IL23A,EFNB1,TCF3,LGMN,IL1R1,WLS,Cd24a,ID3,PLD4,PRDX1,TLR2	11
Cancer, Hematological Disease, Immunological Disease, Organismal Injury and Abnormalities	plasma cell neoplasm	Plasma cell neoplasm	0.000359					JUN,PDGFRB,TCF3,LGMN,PDGFRA,COL6A1,CTSC,PLD4,PPP3CA,NDC80	10
Cellular Development, Cellular Growth and Proliferation, Organ Development, Renal and Urological System Development and Function	proliferation	Proliferation of mesangial cells	0.000367					PDGFRB,PPP3CA,TLR2	3
Cell Morphology, Embryonic Development	shape change	Shape change of embryonic cell lines	0.000367					EFNB1,EHD1,MSR1	3
Embryonic Development, Nervous System Development and Function, Ophthalmic Disease, Organ Development, Organ Morphology, Organismal Development, Organismal Injury and Abnormalities, Tissue Development, Visual System Development and Function	abnormal morphology	Abnormal morphology of anterior segment of the eye	0.000369					TGFA,IL1R1,ID3,FOXC2	4
Cancer, Hematological Disease, Organismal Injury and Abnormalities	mature lymphocytic neoplasm	Mature lymphocytic neoplasm	0.000374					JUN,PDGFRB,TCF3,LGMN,PDGFRA,COL6A1,EHD1,ID3,PLD4,PPP3CA,S100A4,CDON,KCNK5,CTSC,NDC80,TLR2,PCOLCE,KLC3	18
Connective Tissue Disorders, Organismal Injury and Abnormalities, Skeletal and Muscular Disorders	abnormality	Abnormality of cartilage tissue	0.000374					JUN,IL1R1,EGLN1,CTSC,FOXC2	5
Renal and Urological System Development and Function	morphology	Morphology of urinary system	0.000374					PDGFRB,LGMN,PDGFRA,CLEC6A,DCN,PPP3CA,FOXC2	7
Cell Death and Survival, Cellular Function and Maintenance	clearance	Clearance of cells	0.000381					IL23A,CLEC6A,Cd24a,TLR2	4
Cardiovascular Disease, Hematological Disease, Metabolic Disease, Organismal Injury and Abnormalities	hyperlipoproteinemia	Hyperlipoproteinemia	0.000381					PLVAP,LBP,PPP3CA,TLR2	4
Hematological System Development and Function, Inflammatory Response, Tissue Morphology	quantity	Quantity of neutrophils	0.000384		-0.883		-0.875	TGFA,IL23A,IL1R1,DCN,TLR2,RGS5	6
Cancer, Hematological Disease, Immunological Disease, Organismal Injury and Abnormalities	B-cell leukemia	B-cell leukemia	0.000387					ZFPM1,JUN,PDGFRB,TCF3,PDGFRA,WLS,MS4A6A,SLC6A2,PRSS22,PPP3CA,TLR2	11
Cellular Function and Maintenance	presence	Presence of blood cells	0.00039					PDGFRB,PRDX1,TLR2	3
Cell-To-Cell Signaling and Interaction, Cellular Movement, Hematological System Development and Function, Immune Cell Trafficking, Inflammatory Response	recruitment	Recruitment of neutrophils	0.000399		1.993		1.879	LYZ,Ccl7,IL1R1,CTSC,TLR2	5
Cell-To-Cell Signaling and Interaction, Cellular Movement	recruitment	Recruitment of myeloid cells	0.000409	Increased	2.202		2.071	LYZ,Ccl7,IL1R1,CTSC,S100A4,TLR2	6
Organismal Injury and Abnormalities, Tissue Morphology	morphology	Morphology of lesion	0.000412					TGFA,JUN,IL1R1,EGLN1,NBEAL2,MSR1,PRDX1,TLR2	8
Ophthalmic Disease, Organismal Injury and Abnormalities	dry eye	Dry eye	0.000414					LYZ,IL1R1,PPP3CA	3
Cellular Movement, Hematological System Development and Function, Immune Cell Trafficking, Inflammatory Response	influx	Influx of neutrophils	0.000414					CTSC,MSR1,TLR2	3
Cardiovascular System Development and Function, Cellular Movement	cell movement	Cell movement of endothelial cells	0.000414		-0.64		-0.777	EFNB1,PDGFRB,LGMN,DCN,ANGPT1,ID3,FOXC2	7
Behavior	learning	Learning	0.000421		-0.873		-1.012	TGFA,JUN,SOD3,EFNB1,LGMN,IL1R1,PPP3CA,TLR2	8
Ophthalmic Disease, Organ Morphology, Organismal Development, Organismal Injury and Abnormalities	abnormal morphology	Abnormal morphology of lacrimal gland	0.00043					IL1R1,ID3	2
Cancer, Endocrine System Disorders, Organismal Injury and Abnormalities	functional neuroendocrine carcinoma	Functional neuroendocrine carcinoma	0.00043					PDGFRB,PDGFRA	2
Cancer, Endocrine System Disorders, Gastrointestinal Disease, Organismal Injury and Abnormalities	islet-cell carcinoma	Islet-cell carcinoma	0.00043					PDGFRB,PDGFRA	2
Cellular Development, Cellular Growth and Proliferation, Connective Tissue Development and Function, Hematological System Development and Function, Hematopoiesis, Organismal Development, Tissue Development	maturation	Maturation of erythroid cells	0.00043					ZFPM1,PDGFRA	2
Cancer, Neurological Disease, Organismal Injury and Abnormalities	glioblastoma	Metastatic glioblastoma	0.00043					PDGFRB,PDGFRA	2
Cancer, Organismal Injury and Abnormalities, Tumor Morphology	PDGFRA D842V mutation-positive gastrointestinal stromal tumor	Progressive PDGFRA D842V mutation-positive gastrointestinal stromal tumor	0.00043					PDGFRB,PDGFRA	2
Cancer, Gastrointestinal Disease, Hepatic System Disease, Organismal Injury and Abnormalities, Tissue Morphology, Tumor Morphology	size	Size of hepatocellular carcinoma	0.00043					JUN,TGFA	2
Cell-To-Cell Signaling and Interaction, Hematological System Development and Function, Inflammatory Response	binding	Binding of professional phagocytic cells	0.000433		0.882		0.777	IL1R1,LBP,MSR1,TLR2,RGS5	5
Gastrointestinal Disease, Inflammatory Disease	inflammatory bowel disease	Inflammatory Bowel Disease	0.000434					IL23A,LYZ,IL1R1,PDGFRA,SLC6A2,LBP,PPP3CA,TLR2	8
Cell Death and Survival, Skeletal and Muscular System Development and Function	cell viability	Cell viability of muscle cells	0.000438					PDGFRB,PDGFRA,ANGPT1	3
Endocrine System Disorders, Gastrointestinal Disease, Metabolic Disease, Neurological Disease, Organismal Injury and Abnormalities	diabetic neuropathy	Diabetic neuropathy	0.000438					PDGFRB,PDGFRA,SLC6A2	3
Cardiovascular System Development and Function, Cellular Development, Cellular Growth and Proliferation, Embryonic Development, Organ Development, Organismal Development, Skeletal and Muscular System Development and Function, Tissue Development	generation	Generation of cardiomyocytes	0.000438					JUN,PDGFRB,PDGFRA	3
Cancer, Gastrointestinal Disease, Organismal Injury and Abnormalities	metastatic rectal cancer	Metastatic rectal cancer	0.000438					PDGFRB,PDGFRA,PPP3CA	3
Cellular Development, Connective Tissue Development and Function, Tissue Development	differentiation	Differentiation of bone cells	0.000441		-1.118		-1.147	JUN,IL23A,EFNB1,TGFBR3,Clec2d (includes others),ID3,TLR2	7
Embryonic Development, Organismal Development, Tissue Development	formation	Formation of mesoderm	0.000463					PDGFRB,WLS,FOXC2	3
Cellular Movement	migration	Migration of stem cells	0.000463					PDGFRB,EFNB1,PDGFRA	3
Cell Death and Survival	survival	Survival of vascular cells	0.000463					PDGFRB,PDGFRA,ANGPT1	3
Cellular Compromise, Inflammatory Response	degranulation	Degranulation of cells	0.000468		0.52		0.449	ZFPM1,LYZ,IL23A,Ccl7,CTSC,NBEAL2,CD300LD,PDGFA,TLR2	9
Cell Death and Survival	cytolysis	Cytolysis	0.000469		0.762		0.734	JUN,LYZ,IBSP,LBP,PPP3CA,PRDX1	6
Infectious Diseases	infection	Infection by Herpesviridae	0.000469					PDGFRA,TGFBR3,SLC6A2,PPP3CA,TLR2	5
Hematological System Development and Function, Organismal Functions	coagulation	Coagulation of blood	0.000476					ZFPM1,PDGFRA,EHD1,NBEAL2,PDGFA,TLR2	6
Gene Expression	activation	Activation of DNA endogenous promoter	0.000477		0.1		-0.009	ZFPM1,JUN,TCF3,ID3,PPP3CA,CDON,IRF2BP1,FOXC2,CSRNP2,IL23A,EGLN1,DCN,TLR2,Glrp1	14
Cellular Movement, Hematological System Development and Function, Immune Cell Trafficking, Inflammatory Response	cellular infiltration	Infiltration by neutrophils	0.000479		1.3		1.238	IL1R1,WLS,CTSC,LBP,TLR2	5
Cancer, Hematological Disease, Immunological Disease, Organismal Injury and Abnormalities	pediatric leukemia	Pediatric leukemia	0.000487					JUN,PDGFRB,PDGFRA,PPP3CA	4
Dermatological Diseases and Conditions, Endocrine System Disorders, Gastrointestinal Disease, Metabolic Disease, Organismal Injury and Abnormalities, Skeletal and Muscular Disorders	diabetic foot ulcer disorder	Diabetic foot ulcer disorder	0.00049					PDGFRB,PDGFRA,COL6A1	3
Cellular Function and Maintenance	ion homeostasis	Ion homeostasis of cells	0.00049		-0.447		-0.571	JUN,IL23A,Ccl7,PDGFRA,CP,EGLN1,KCNK5,Cd24a,TLR2	9
Cancer, Hematological Disease, Immunological Disease, Organismal Injury and Abnormalities	t(1;19) mutation acute lymphocytic leukemia	T(1;19) mutation acute lymphocytic leukemia	0.00049					PDGFRB,PDGFRA,PPP3CA	3
Cellular Movement, Embryonic Development	cell movement	Cell movement of embryonic cells	0.000501					PDGFRB,EFNB1,PDGFRA,S100A4	4
Dermatological Diseases and Conditions, Inflammatory Disease, Inflammatory Response, Organismal Injury and Abnormalities, Skeletal and Muscular Disorders	dermatomyositis	Dermatomyositis	0.000501					IL1R1,COL6A1,TGFBR3,PPP3CA	4
Gene Expression	transcription	Transcription	0.000503		-0.904		-1.018	ZFPM1,TGFA,JUN,TCF3,LGMN,TGFBR3,ID3,MSR1,PPP3CA,CDON,IRF2BP1,FOXC2,CSRNP2,IL23A,EGLN1,DCN,ANGPT1,PDGFA,TLR2,Glrp1	20
Cellular Function and Maintenance, Hematological System Development and Function	function	Function of lymphocytes	0.000506					IL23A,LGMN,CTSC,KCNK5,ID3,TLR2	6
Cardiovascular System Development and Function, Cellular Development, Cellular Function and Maintenance, Cellular Growth and Proliferation, Embryonic Development, Organ Development, Organismal Development, Skeletal and Muscular System Development and Function, Tissue Development	assembly	Assembly of cardiomyocytes	0.000515					PDGFRB,PDGFRA	2
Cardiovascular System Development and Function, Cell-To-Cell Signaling and Interaction	attachment	Attachment of endothelial cells	0.000515					DCN,ANGPT1	2
Cardiovascular System Development and Function	contractility	Contractility of artery	0.000515					SOD3,EPHB6	2
Cardiovascular System Development and Function, Organismal Development	development	Development of pulmonary artery	0.000515					JUN,EGLN1	2
Cancer, Hematological Disease, Organismal Injury and Abnormalities	FGFR1 rearrangement positive myeloid or lymphoid neoplasm	FGFR1 rearrangement positive myeloid or lymphoid neoplasm	0.000515					PDGFRB,PDGFRA	2
Cell Cycle	G1/S phase transition	G1/S phase transition of connective tissue cells	0.000515					JUN,FOXC2	2
Cancer, Hematological Disease, Immunological Disease, Organismal Injury and Abnormalities	accelerated phase chronic myelogenous leukemia	Imatinib resistant accelerated phase chronic myelogenous leukemia	0.000515					PDGFRB,PDGFRA	2
Cancer, Hematological Disease, Immunological Disease, Organismal Injury and Abnormalities	imatinib-resistant chronic phase chronic myeloid leukemia	Imatinib-resistant chronic phase chronic myeloid leukemia	0.000515					PDGFRB,PDGFRA	2
Cell-To-Cell Signaling and Interaction	interaction	Interaction of bone marrow stromal cells	0.000515					JUN,DCN	2
Cancer, Hematological Disease, Immunological Disease, Organismal Injury and Abnormalities	mast cell leukemia	Mast cell leukemia	0.000515					PDGFRB,PDGFRA	2
Cancer, Endocrine System Disorders, Gastrointestinal Disease, Organismal Injury and Abnormalities, Tumor Morphology	progressive neuroendocrine tumor of pancreatic origin	Metastatic well-differentiated progressive neuroendocrine tumor of pancreatic origin	0.000515					PDGFRB,PDGFRA	2
Hematological Disease, Immunological Disease	hypereosinophilia	Hypereosinophilia	0.000517					PDGFRB,PDGFRA,PPP3CA	3
Cardiovascular System Development and Function, Tissue Morphology	morphology	Morphology of capillary vessel	0.000517					PLVAP,EGLN1,FOXC2	3
Organismal Injury and Abnormalities	sclerotic lesion	Sclerotic lesion	0.000518					PDGFRB,IL1R1,PDGFRA,MSR1,TLR2	5
Inflammatory Disease, Inflammatory Response, Organismal Injury and Abnormalities, Respiratory Disease	inflammation	Inflammation of lung	0.000535		0.892		0.947	TGFA,IL1R1,ANGPT1,PPP3CA,PRDX1,S100A4,TLR2	7
Cancer, Endocrine System Disorders, Gastrointestinal Disease, Organismal Injury and Abnormalities	digestive system neuroendocrine tumor	Digestive system neuroendocrine tumor	0.000543					PDGFRB,PDGFRA,WLS,MEX3D,MS4A6A,KCNK5,MSR1,PRDX1	8
DNA Replication, Recombination, and Repair	metabolism	Metabolism of DNA	0.000547		-1.761		-1.808	JUN,ERCC1,ANGPT1,ID3,MSR1,S100A4,FOXC2	7
Cellular Development, Cellular Growth and Proliferation	cell proliferation	Cell proliferation of carcinoma cell lines	0.000558		0.058		-0.036	TGFA,JUN,ERCC1,BAIAP2L1,TCF3,PDGFRA,TGFBR3,PDGFA,TLR2	9
Skeletal and Muscular Disorders	limb defect	Limb defect	0.00056					EFNB1,IBSP,TGFBR3,COL6A1,Clec2d (includes others),SLC6A2,PCOLCE	7
Cell-To-Cell Signaling and Interaction, Cellular Growth and Proliferation, Hematological System Development and Function	stimulation	Stimulation of lymphocytes	0.000562					IL23A,EFNB1,Cd24a,S100A4	4
Cancer	hyperplasia	Hyperplasia of tissue	0.000571		-0.714		-0.66	TGFA,IL23A,EGLN1,DCN,MSR1	5
Cellular Development	differentiation	Differentiation of germ cell tumor cell lines	0.000574					JUN,TCF3,ID3	3
Cancer, Hematological Disease, Immunological Disease, Organismal Injury and Abnormalities	intermediate-risk acute myeloid leukemia	Intermediate-risk acute myeloid leukemia	0.000574					PDGFRB,PDGFRA,PPP3CA	3
Cardiovascular System Development and Function, Embryonic Development, Organismal Development, Tissue Development	morphogenesis	Morphogenesis of outflow tract	0.000574					JUN,ZFPM1,TGFBR3	3
Cell Morphology, Embryonic Development	morphology	Morphology of embryonic cell lines	0.000574					JUN,EFNB1,MSR1	3
Cellular Development	maturation	Maturation of lymphatic system cells	0.000578					ZFPM1,TCF3,PDGFRA,NBEAL2	4
Cell Death and Survival	apoptosis	Apoptosis of lung cancer cell lines	0.000585		0		0.041	JUN,PDGFRA,TGFBR3,ID3,S100A4,CDON	6
Cellular Development, Cellular Growth and Proliferation, Organ Development, Skeletal and Muscular System Development and Function, Tissue Development	proliferation	Proliferation of muscle cells	0.000587		0.6		0.54	JUN,PDGFRB,TGFBR3,ANGPT1,ID3,TLR2,FOXC2	7
Inflammatory Disease, Inflammatory Response, Organismal Injury and Abnormalities, Respiratory Disease	inflammation	Inflammation of airway	0.000594					IL23A,LYZ,IL1R1,SLC6A2,PPP3CA,PRDX1,TLR2	7
Cellular Movement, Embryonic Development	cell movement	Cell movement of embryonic cell lines	0.000604		1.069		0.934	EFNB1,EHD1,MSR1,ANGPT1,TLR2	5
Cell Death and Survival	killing	Killing of cells	0.000604		0.555		0.501	LYZ,Clec2d (includes others),MSR1,PRDX1,TLR2	5
Connective Tissue Development and Function, Skeletal and Muscular System Development and Function, Tissue Development	morphology	Morphology of trabecular bone	0.000604					IL23A,IBSP,Clec2d (includes others),DCN,PCOLCE	5
Connective Tissue Disorders, Organ Morphology, Organismal Injury and Abnormalities, Skeletal and Muscular Disorders, Skeletal and Muscular System Development and Function, Tissue Morphology	abnormal morphology	Abnormal morphology of tendon	0.000607					DCN,PCOLCE	2
Cancer, Dermatological Diseases and Conditions, Metabolic Disease, Organismal Injury and Abnormalities	atypical fibroxanthoma	Atypical fibroxanthoma	0.000607					PDGFRB,PDGFRA	2
Cancer, Hematological Disease, Immunological Disease, Organismal Injury and Abnormalities	Philadelphia-positive acute lymphoblastic leukemia	Chemotherapy refractory Philadelphia-positive acute lymphoblastic leukemia	0.000607					PDGFRB,PDGFRA	2
Connective Tissue Disorders, Inflammatory Disease, Organismal Injury and Abnormalities, Respiratory Disease	chronic fibrosing interstitial lung disease	Chronic fibrosing interstitial lung disease	0.000607					PDGFRB,PDGFRA	2
Cardiovascular System Development and Function, Organismal Development	formation	Formation of aorta	0.000607					JUN,WLS	2
Cancer, Cardiovascular Disease, Organismal Injury and Abnormalities	glomangiosarcoma	Glomangiosarcoma	0.000607					PDGFRB,PDGFRA	2
Cancer, Cardiovascular Disease, Organismal Injury and Abnormalities	hemangiopericytoma	Hemangiopericytoma	0.000607					PDGFRB,PDGFRA	2
Cancer, Hematological Disease, Immunological Disease, Organismal Injury and Abnormalities	IG-MYC translocation positive Burkitt lymphoma	IG-MYC translocation positive Burkitt lymphoma	0.000607					PDGFRB,TCF3	2
Inflammatory Response, Ophthalmic Disease, Organismal Injury and Abnormalities	inflammation	Inflammation of lacrimal gland	0.000607					IL1R1,ID3	2
Developmental Disorder, Neurological Disease	learning deficit	Learning deficit	0.000607					ERCC1,LGMN	2
Connective Tissue Disorders, Hematological Disease, Immunological Disease, Organismal Injury and Abnormalities	leukocytosis	Leukocytosis of blood	0.000607					ZFPM1,IL1R1	2
Cancer, Organismal Injury and Abnormalities	alveolar soft part sarcoma	Metastatic alveolar soft part sarcoma	0.000607					PDGFRB,PDGFRA	2
Cancer, Inflammatory Response, Organismal Injury and Abnormalities	inflammatory myofibroblastic tumor	Metastatic inflammatory myofibroblastic tumor	0.000607					PDGFRB,PDGFRA	2
Cancer, Gastrointestinal Disease, Organismal Injury and Abnormalities	metastatic refractory colorectal adenocarcinoma	Metastatic refractory colorectal adenocarcinoma	0.000607					PDGFRB,PDGFRA	2
Cancer, Organismal Injury and Abnormalities	metastatic soft tissue chondrosarcoma	Metastatic soft tissue chondrosarcoma	0.000607					PDGFRB,PDGFRA	2
Cancer, Organismal Injury and Abnormalities	metastatic solitary fibrous tumor	Metastatic solitary fibrous tumor	0.000607					PDGFRB,PDGFRA	2
Cellular Movement, Embryonic Development	migration	Migration of mesenchymal stem cells	0.000607					PDGFRB,PDGFRA	2
Cell Cycle	mitogenesis	Mitogenesis of bone marrow cell lines	0.000607					PDGFRB,PDGFRA	2
Cancer, Organismal Injury and Abnormalities	myoepithelial carcinoma	Myoepithelial carcinoma	0.000607					PDGFRB,PDGFRA	2
Cancer, Organismal Injury and Abnormalities	myofibroblastic sarcoma	Myofibroblastic sarcoma	0.000607					PDGFRB,PDGFRA	2
Cancer, Organismal Injury and Abnormalities, Renal and Urological Disease	renal clear cell adenocarcinoma	Nonmetastatic renal clear cell adenocarcinoma	0.000607					PDGFRB,PDGFRA	2
Cancer, Organismal Injury and Abnormalities	ossifying fibromyxoid tumor	Ossifying fibromyxoid tumor	0.000607					PDGFRB,PDGFRA	2
Cancer, Organismal Injury and Abnormalities	phosphaturic mesenchymal tumor	Phosphaturic mesenchymal tumor	0.000607					PDGFRB,PDGFRA	2
Cardiovascular Disease, Tissue Morphology	regression	Regression of blood vessel	0.000607					PDGFRB,PDGFRA	2
Cancer, Organismal Injury and Abnormalities	sclerosing epithelioid fibrosarcoma	Sclerosing epithelioid fibrosarcoma	0.000607					PDGFRB,PDGFRA	2
Cancer, Organismal Injury and Abnormalities	epithelioid sarcoma	Stage II-III epithelioid sarcoma	0.000607					PDGFRB,PDGFRA	2
Cancer, Organismal Injury and Abnormalities, Renal and Urological Disease	metastatic bladder cancer	Stage IV metastatic bladder cancer	0.000607					PDGFRB,PDGFRA	2
Cancer, Organismal Injury and Abnormalities	gastrointestinal stromal tumor	Systemic gastrointestinal stromal tumor	0.000607					PDGFRB,PDGFRA	2
Cardiovascular Disease, Connective Tissue Disorders, Dermatological Diseases and Conditions, Immunological Disease, Inflammatory Disease, Organismal Injury and Abnormalities, Respiratory Disease, Skeletal and Muscular Disorders	systemic sclerosis associated interstitial lung disease	Systemic sclerosis associated interstitial lung disease	0.000607					PDGFRB,PDGFRA	2
Cancer, Organismal Injury and Abnormalities, Renal and Urological Disease	renal clear cell adenocarcinoma	TNM stage T1-4N1 renal clear cell adenocarcinoma	0.000607					PDGFRB,PDGFRA	2
Cancer, Organismal Injury and Abnormalities	undifferentiated spindle cell sarcoma	Undifferentiated spindle cell sarcoma	0.000607					PDGFRB,PDGFRA	2
Cancer, Organismal Injury and Abnormalities	adenocarcinoma	Adenocarcinoma	0.000611	Decreased	-2.186		-2.12	IBSP,MOXD1,LGMN,MEX3D,EHD1,PRDX1,IRF2BP1,PAPLN,IL23A,SBK1,NT5DC3,MS4A6A,ANGPT1,TLR2,EFNB1,EPHB6,PDGFRA,CADM4,CSRNP2,LYZ,SOD3,CLEC6A,CTSC,PDGFRL,USP43,KLC3,PCOLCE,ZFPM1,JUN,ERCC1,COL6A1,NBEAL2,LBP,S100A4,CDON,FOXC2,BAIAP2L1,IL1R1,WLS,DCN,NDC80,IER5L,TGFA,MS4A4A,PDGFRB,TCF3,ENO3,CP,TGFBR3,SLC6A2,ID3,PLD4,MSR1,PPP3CA,PLVAP,KCNK5,PDGFA,RGS5	58
Cancer, Organismal Injury and Abnormalities	anogenital cancer	Anogenital cancer	0.000613					ZFPM1,JUN,ERCC1,IBSP,MOXD1,LGMN,COL6A1,MEX3D,NBEAL2,LBP,PRDX1,S100A4,CDON,PAPLN,FOXC2,IL23A,BAIAP2L1,IL1R1,EGLN1,WLS,DCN,ANGPT1,NDC80,TLR2,TGFA,EFNB1,MS4A4A,PDGFRB,TCF3,EPHB6,PDGFRA,CP,TGFBR3,SLC6A2,ID3,PLD4,MSR1,PPP3CA,PRSS22,CADM4,LYZ,PLVAP,CTSC,KCNK5,PDGFRL,PDGFA,RGS5,PCOLCE	48
Hematological System Development and Function, Lymphoid Tissue Structure and Development, Tissue Morphology	quantity	Quantity of T lymphocytes	0.000618		1.026		0.894	IL23A,EFNB1,TCF3,IL1R1,WLS,ID3,PLD4,PRDX1,TLR2	9
Cancer, Organismal Injury and Abnormalities	fibromatosis	Fibroma	0.000628					PDGFRB,PDGFRA,COL6A1,TGFBR3	4
Carbohydrate Metabolism, Small Molecule Biochemistry	catabolism	Catabolism of glycosaminoglycan	0.000635					SOD3,CP,DCN	3
Cellular Movement, Hematological System Development and Function, Hypersensitivity Response, Immune Cell Trafficking, Inflammatory Response	cell movement	Cell movement of mast cells	0.000635					MS4A4A,Ccl7,WLS	3
Cancer, Gastrointestinal Disease, Organismal Injury and Abnormalities	intestinal tumor	Intestinal tumor	0.000647		-1.387		-1.321	IBSP,MOXD1,MEX3D,EHD1,PRDX1,IRF2BP1,PAPLN,SBK1,NT5DC3,MS4A6A,ANGPT1,TLR2,EFNB1,EPHB6,PDGFRA,CADM4,CSRNP2,SOD3,CLEC6A,CTSC,PDGFRL,USP43,KLC3,PCOLCE,ZFPM1,JUN,ERCC1,COL6A1,NBEAL2,LBP,S100A4,CDON,PLET1,FOXC2,BAIAP2L1,WLS,DCN,IER5L,TGFA,PDGFRB,TCF3,ENO3,CP,TGFBR3,SLC6A2,ID3,PLD4,MSR1,PPP3CA,PLVAP,KCNK5,PDGFA,RGS5	53
Cancer, Organismal Injury and Abnormalities	precancerous condition	Precancerous condition	0.000664					ERCC1,LYZ,CTSC,MSR1	4
Cell Morphology, Organismal Injury and Abnormalities	hypertrophy	Hypertrophy of cells	0.000665					JUN,PDGFRB,TGFBR3,CTSC,PPP3CA,TLR2	6
Cellular Development, Cellular Growth and Proliferation, Connective Tissue Development and Function, Tissue Development	development	Development of connective tissue cells	0.000674		-1.547		-1.611	JUN,IL23A,LGMN,Clec2d (includes others),ID3,PPP3CA	6
Cellular Development, Cellular Growth and Proliferation, Hematological System Development and Function, Lymphoid Tissue Structure and Development	expansion	Expansion of leukocytes	0.000688		0.2		0.118	IL23A,TCF3,EGLN1,Cd24a,TLR2	5
Cancer, Organismal Injury and Abnormalities, Reproductive System Disease	breast or gynecological cancer	Breast or gynecological cancer	0.000692					ZFPM1,JUN,ERCC1,IBSP,MOXD1,LGMN,COL6A1,NBEAL2,LBP,PRDX1,S100A4,CDON,FOXC2,IL23A,BAIAP2L1,IL1R1,EGLN1,WLS,DCN,ANGPT1,NDC80,TGFA,EFNB1,MS4A4A,PDGFRB,TCF3,EPHB6,PDGFRA,CP,TGFBR3,SLC6A2,PLD4,MSR1,ID3,PPP3CA,CADM4,LYZ,PLVAP,CTSC,PDGFRL,PDGFA,RGS5,PCOLCE	43
Cell Morphology, Tissue Morphology	morphology	Morphology of epithelial cells	0.000693					TGFA,JUN,ERCC1,TCF3,CP,TLR2	6
Cellular Development, Cellular Growth and Proliferation	development	Development of breast cancer cell lines	0.0007		-0.776		-0.827	JUN,IBSP,TLR2,FOXC2	4
Connective Tissue Disorders, Organismal Injury and Abnormalities, Skeletal and Muscular Disorders, Skeletal and Muscular System Development and Function	rib fusion	Rib fusion	0.000701					PDGFRA,TGFBR3,FOXC2	3
Connective Tissue Development and Function, Skeletal and Muscular System Development and Function, Tissue Development, Tissue Morphology	thickness	Thickness of cortical bone	0.000701					Clec2d (includes others),S100A4,PCOLCE	3
Cancer, Organismal Injury and Abnormalities	angiomatoid fibrous histiocytoma	Angiomatoid fibrous histiocytoma	0.000707					PDGFRB,PDGFRA	2
Developmental Disorder, Ophthalmic Disease, Organismal Injury and Abnormalities	aplasia or hypoplasia	Aplasia or hypoplasia of eye	0.000707					ID3,FOXC2	2
Cancer, Gastrointestinal Disease, Hepatic System Disease, Organismal Injury and Abnormalities	primary hepatocellular carcinoma	Child-Pugh class A primary hepatocellular carcinoma	0.000707					PDGFRB,PDGFRA	2
Cancer, Hematological Disease, Immunological Disease, Organismal Injury and Abnormalities	chronic myeloid leukemia	Chronic phase refractory chronic myeloid leukemia	0.000707					PDGFRB,PDGFRA	2
Cancer, Cardiovascular Disease, Organismal Injury and Abnormalities	intimal sarcoma	Intimal sarcoma	0.000707					PDGFRB,PDGFRA	2
Cancer, Endocrine System Disorders, Organismal Injury and Abnormalities	thyroid oncocytic carcinoma	Locally advanced thyroid oncocytic carcinoma	0.000707					PDGFRB,PDGFRA	2
Cancer, Organismal Injury and Abnormalities	low-grade fibromyxoid sarcoma	Low-grade fibromyxoid sarcoma	0.000707					PDGFRB,PDGFRA	2

## Sheet: ToxFunctions
Tox Functions for My Projects->Shanta_4sc2->Meta_70 - 2021-08-17 12:18 PM
Categories	Functions	Diseases or Functions Annotation	p-Value	Predicted Activation State	Activation z-score	Notes	Bias-corrected z-score	Molecules	# Molecules
Renal Damage	nephrotoxicity	Nephrotoxicity	1.18e-05					ERCC1,LYZ,CP,Cd24a,PPP3CA	5
Glomerular Injury	bleeding	Bleeding of renal glomerulus	4.75e-05					PDGFRB,FOXC2	2
Cardiac Enlargement	hypertrophy	Hypertrophy of heart	6.99e-05					JUN,TGFBR3,EGLN1,CTSC,ANGPT1,PPP3CA,PDGFA,RGS5	8
Glomerular Injury	abnormal morphology	Abnormal morphology of mesangial cells	7.9e-05					PDGFRB,FOXC2	2
Cardiac Enlargement	enlargement	Enlargement of heart	0.000151					JUN,IL23A,IL1R1,EGLN1,TGFBR3,CTSC,ANGPT1,PPP3CA,PDGFA,RGS5	10
Renal Proliferation	proliferation	Proliferation of mesangial cells	0.000367					PDGFRB,PPP3CA,TLR2	3
Hepatocellular carcinoma, Liver Hyperplasia/Hyperproliferation	size	Size of hepatocellular carcinoma	0.00043					JUN,TGFA	2
Hepatocellular carcinoma, Liver Hyperplasia/Hyperproliferation	primary hepatocellular carcinoma	Child-Pugh class A primary hepatocellular carcinoma	0.000707					PDGFRB,PDGFRA	2
Liver Hyperplasia/Hyperproliferation	liver metastasis	Symptomatic stage iodine-refractory liver metastasis	0.000707					PDGFRB,PDGFRA	2
Liver Hyperplasia/Hyperproliferation	development	Development of liver tumor	0.000818		-1.067		-0.968	JUN,PRDX1,S100A4,TLR2	4
Liver Cirrhosis, Liver Fibrosis	cirrhosis	Cirrhosis of liver	0.000837					TGFA,IL23A,PDGFRB,SLC6A2,PPP3CA	5
Congenital Heart Anomaly	ventricular septal defect	Ventricular septal defect	0.000927		0.152		0.373	JUN,PDGFRA,TGFBR3,FOXC2	4
Hepatocellular carcinoma, Liver Hyperplasia/Hyperproliferation	advanced hepatocellular carcinoma	BCLC stage C advanced hepatocellular carcinoma	0.00105					PDGFRB,PDGFRA	2
Liver Fibrosis	fibrosis	Fibrosis of liver	0.00106					TGFA,JUN,IL23A,PDGFRB,SLC6A2,PPP3CA	6
Cardiac Enlargement	hypertrophy	Hypertrophy of heart cells	0.00112					JUN,TGFBR3,CTSC,PPP3CA	4
Liver Hyperplasia/Hyperproliferation	liver metastasis	Progressive liver metastasis	0.00118					PDGFRB,PDGFRA	2
Kidney Failure	end stage renal disease	End stage renal disease	0.00134					LGMN,SLC6A2,DCN,PPP3CA	4
Cardiac Fibrosis	fibrosis	Fibrosis of heart	0.00141		-1.021		-0.964	JUN,PPP3CA,CDON,TLR2,RGS5	5
Renal Necrosis/Cell Death	apoptosis	Apoptosis of renal tubular epithelial cells	0.00146					DCN,TLR2	2
Hepatocellular carcinoma, Liver Hyperplasia/Hyperproliferation	quantity	Quantity of hepatocellular carcinoma	0.00146					JUN,TGFA	2
Congenital Heart Anomaly	conotruncal heart malformations	Conotruncal heart malformations	0.00148					JUN,TGFBR3,FOXC2	3
Pulmonary Hypertension	pulmonary hypertension	Pulmonary Hypertension	0.00149					PDGFRB,PDGFRA,EGLN1,ANGPT1	4
Renal Atrophy	atrophy	Atrophy of renal tubule	0.00161					LGMN,DCN	2
Cardiac Inflammation	experimental autoimmune myocarditis	Experimental autoimmune myocarditis	0.00161					IL23A,IL1R1	2
Renal Dysfunction	dysfunction	Dysfunction of kidney	0.00193					PPP3CA,TLR2	2
Congenital Heart Anomaly	familial congenital heart disease	Familial congenital heart disease	0.0021					JUN,TGFBR3,SLC6A2,FOXC2	4
Renal Damage, Renal Tubule Injury	proximal tubular toxicity	Proximal tubular toxicity	0.00237					LYZ,CP,Cd24a	3
Renal Hydronephrosis	hydronephrosis	Hydronephrosis	0.00259					LGMN,CLEC6A,DCN	3
Hepatocellular carcinoma, Liver Hyperplasia/Hyperproliferation	advanced hepatocellular carcinoma	Child-Pugh class A advanced hepatocellular carcinoma	0.00266					PDGFRB,PDGFRA	2
Glomerular Injury	glomerulosclerosis	Glomerulosclerosis	0.00282		-1		-0.903	JUN,PDGFRB,LGMN,DCN	4
Liver Necrosis/Cell Death	apoptosis	Apoptosis of hepatoblasts	0.00284					JUN	1
Renal Hyperplasia/Hyperproliferation	hyperplasia	Hyperplasia of proximal tubule cells	0.00284					LGMN	1
Renal Necrosis/Cell Death	apoptosis	Apoptosis of kidney cells	0.00299					DCN,PPP3CA,TLR2	3
Liver Steatosis	hepatic steatosis	Hepatic steatosis	0.00312		1.365		1.433	JUN,ERCC1,EGLN1,LBP,S100A4,TLR2	6
Renal Damage	injury	Injury of kidney	0.00323					IL23A,LYZ,IL1R1,TLR2	4
Liver Inflammation/Hepatitis	inflammation	Inflammation of liver	0.00344		1.067		1.145	TGFA,JUN,IL23A,IL1R1,PPP3CA,S100A4	6
Liver Cirrhosis, Liver Fibrosis	primary biliary cirrhosis	Primary biliary cirrhosis	0.00361					TGFA,PDGFRB,PPP3CA	3
Hepatocellular carcinoma, Liver Hyperplasia/Hyperproliferation	development	Development of hepatocellular carcinoma	0.00381					JUN,PRDX1,S100A4	3
Hepatocellular carcinoma, Liver Hyperplasia/Hyperproliferation	hepatocellular carcinoma	BCLC stage B hepatocellular carcinoma	0.00445					PDGFRB,PDGFRA	2
Congenital Heart Anomaly	persistent truncus arteriosus	Persistent truncus arteriosus	0.00445					JUN,FOXC2	2
Glomerular Injury	abnormal morphology	Abnormal morphology of renal glomerulus	0.00463					PDGFRB,LGMN,FOXC2	3
Hepatocellular carcinoma, Liver Hyperplasia/Hyperproliferation	hepatocellular carcinoma	Hepatocellular carcinoma	0.00465	Decreased	-2.186		-2.102	TGFA,JUN,PDGFRB,PDGFRA,CP,PPP3CA,PRDX1,S100A4,MS4A6A,DCN,PDGFRL,TLR2,RGS5	13
Renal Damage	reperfusion injury	Reperfusion injury of kidney	0.0047					IL1R1,TLR2	2
Cardiac Enlargement	right ventricular hypertrophy	Right ventricular hypertrophy	0.0047					EGLN1,PDGFA	2
Hepatocellular carcinoma, Liver Hyperplasia/Hyperproliferation	hepatocellular carcinoma	Progressive hepatocellular carcinoma	0.00523					PDGFRB,PDGFRA	2
Congenital Heart Anomaly	congenital heart disease	Congenital heart disease	0.00558		0.192		0.417	JUN,PDGFRA,TGFBR3,SLC6A2,FOXC2	5
Cardiac Necrosis/Cell Death	cell death	Cell death of heart tissue	0.00567					EGLN1	1
Glomerular Injury	glomerular cyst	Glomerular cyst	0.00567					LGMN	1
Cardiac Arteriopathy	ischemic coronary artery disease	Ischemic coronary artery disease	0.00567					TLR2	1
Glomerular Injury	loss	Loss of mesangial cells	0.00567					PDGFRB	1
Liver Inflammation/Hepatitis	chronic viral hepatitis	Chronic viral hepatitis	0.0058					IL23A,PPP3CA,S100A4	3
Glomerular Injury, Renal Fibrosis	fibrosis	Fibrosis of kidney	0.00619					JUN,LGMN,DCN	3
Glomerular Injury	abnormal morphology	Abnormal morphology of podocytes	0.00666					PDGFRB,FOXC2	2
Liver Hyperplasia/Hyperproliferation	cancer	Liver cancer	0.00758		-1.747		-1.695	ZFPM1,JUN,MOXD1,LGMN,COL6A1,NBEAL2,LBP,PRDX1,S100A4,EGLN1,MS4A6A,DCN,ANGPT1,TLR2,TGFA,EFNB1,PDGFRB,EPHB6,PDGFRA,CP,SLC6A2,ID3,MSR1,PPP3CA,SOD3,PLVAP,CTSC,PDGFRL,USP43,RGS5	30
Cardiac Infarction	myocardial infarction	Early stage myocardial infarction	0.0085					Ccl7	1
Cardiac Fibrosis	fibrosis	Fibrosis of cardiac valve	0.0085					TLR2	1
Liver Hyperplasia/Hyperproliferation	hematologic cancer	Hematologic cancer of liver	0.0085					ID3	1
Glomerular Injury	lack	Lack of podocytes	0.0085					PDGFRB	1
Hepatocellular carcinoma, Liver Hyperplasia/Hyperproliferation	hepatocellular carcinoma	Unresectable hepatocellular carcinoma	0.00857					PDGFRB,PDGFRA	2
Liver Hyperplasia/Hyperproliferation	liver carcinoma	Liver carcinoma	0.00912	Decreased	-2.186		-2.093	ZFPM1,JUN,MOXD1,LGMN,COL6A1,NBEAL2,PRDX1,S100A4,EGLN1,MS4A6A,DCN,ANGPT1,TLR2,TGFA,EFNB1,PDGFRB,EPHB6,PDGFRA,CP,SLC6A2,ID3,MSR1,PPP3CA,SOD3,PLVAP,CTSC,PDGFRL,USP43,RGS5	29
Renal Necrosis/Cell Death	cell death	Cell death of kidney cells	0.00973		-0.152		-0.214	TCF3,DCN,PPP3CA,TLR2,CDON	5
Liver Hyperplasia/Hyperproliferation	liver cancer	Early stage liver cancer	0.0113					JUN	1
Glomerular Injury, Renal Inflammation, Renal Nephritis	inflammation	Inflammation of renal glomerulus	0.0113					TLR2	1
Renal Necrosis/Cell Death	survival	Survival of mesangial cells	0.0113					PPP3CA	1
Liver Proliferation	proliferation	Proliferation of hepatocytes	0.013					TGFA,JUN,ERCC1	3
Cardiac Infarction	myocardial infarction	Myocardial infarction	0.013					Ccl7,IL1R1,PPP3CA,TLR2	4
Increased Levels of Creatinine	quantity	Increased Levels of Creatinine	0.0135					IL1R1,PPP3CA	2
Cardiac Enlargement	ventricular hypertrophy	Ventricular hypertrophy	0.0136					EGLN1,PPP3CA,PDGFA	3
Renal Inflammation, Renal Nephritis	nephritis	Nephritis	0.014					JUN,Cd24a,DCN,PPP3CA,TLR2	5
Cardiac Inflammation	acute myocarditis	Acute myocarditis	0.0141					IL1R1	1
Liver Cirrhosis, Liver Failure, Liver Fibrosis	acute-on-chronic liver failure	Acute-on-chronic liver failure	0.0141					IL23A	1
Glomerular Injury, Kidney Failure, Renal Fibrosis	interstitial fibrosis	Interstitial fibrosis of kidney	0.0152					LGMN,DCN	2
Glomerular Injury, Renal Inflammation, Renal Nephritis	lupus nephritis	Stage III lupus nephritis	0.0169					PPP3CA	1
Glomerular Injury, Renal Inflammation, Renal Nephritis	lupus nephritis	Stage IV lupus nephritis	0.0169					PPP3CA	1
Glomerular Injury, Renal Inflammation, Renal Nephritis	lupus nephritis	Stage V lupus nephritis	0.0169					PPP3CA	1
Renal Inflammation, Renal Nephritis	tubular nephritis	Tubular nephritis	0.0169					DCN	1
Liver Failure	failure	Failure of liver	0.0188					IL23A,PPP3CA	2
Pulmonary Hypertension	pulmonary hypertensive arterial disease	Pulmonary hypertensive arterial disease	0.0188					PDGFRB,PDGFRA	2
Liver Hyperplasia/Hyperproliferation	liver tumor	Liver tumor	0.0196		-1.509		-1.463	ZFPM1,JUN,MOXD1,LGMN,COL6A1,NBEAL2,LBP,PRDX1,S100A4,PAPLN,EGLN1,MS4A6A,DCN,ANGPT1,TLR2,TGFA,EFNB1,PDGFRB,EPHB6,PDGFRA,CP,SLC6A2,ID3,MSR1,PPP3CA,CSRNP2,SOD3,PLVAP,CTSC,PDGFRL,USP43,RGS5	32
Hepatocellular carcinoma, Liver Hyperplasia/Hyperproliferation	progression	Progression of hepatocellular carcinoma	0.0197					TLR2	1
Liver Inflammation/Hepatitis	chronic hepatitis C	Chronic hepatitis C	0.0233					PPP3CA,S100A4	2
Glomerular Injury, Renal Inflammation, Renal Nephritis	autoimmune glomerulonephritis	Autoimmune glomerulonephritis	0.0239					JUN,PPP3CA	2
Glomerular Injury, Renal Thrombosis	thrombosis	Thrombosis of renal glomerulus	0.0253					TLR2	1
Hepatocellular carcinoma, Liver Hyperplasia/Hyperproliferation	advanced hepatocellular carcinoma	BCLC stage B advanced hepatocellular carcinoma	0.028					PDGFRB	1
Hepatocellular carcinoma, Liver Hyperplasia/Hyperproliferation	primary hepatocellular carcinoma	BCLC stage B primary hepatocellular carcinoma	0.028					PDGFRB	1
Hepatocellular carcinoma, Liver Hyperplasia/Hyperproliferation	primary hepatocellular carcinoma	BCLC stage C primary hepatocellular carcinoma	0.028					PDGFRB	1
Decreased Levels of Hematocrit	hematocrit	Decreased hematocrit of organism	0.028					EGLN1	1
Cardiac Fibrosis	fibrosis	Fibrosis of atrium	0.028					TLR2	1
Cardiac Enlargement	hypertrophy	Hypertrophy of myocardium	0.028					PPP3CA	1
Hepatocellular carcinoma, Liver Hyperplasia/Hyperproliferation	hepatocellular carcinoma	Local hepatocellular carcinoma	0.028					PDGFRB	1
Liver Damage	damage	Liver Damage	0.0303					IL1R1,LBP,TLR2	3
Hepatocellular carcinoma, Liver Hyperplasia/Hyperproliferation	hepatocellular carcinoma	Inoperable hepatocellular carcinoma	0.0308					PDGFRB	1
Increased Levels of Hematocrit	hematocrit	Increased Levels of Hematocrit	0.0317					LGMN,PRDX1	2
Renal Atrophy	atrophy	Atrophy of renal cortex	0.0336					LGMN	1
Hepatocellular carcinoma, Liver Hyperplasia/Hyperproliferation	hepatocellular carcinoma	Intermediate disease stage hepatocellular carcinoma	0.0336					PDGFRB	1
Renal Enlargement	hypertrophy	Hypertrophy of mesangial cells	0.0363					PDGFRB	1
Glomerular Injury, Renal Inflammation, Renal Nephritis	idiopathic membranous nephropathy	Idiopathic membranous nephropathy	0.0418					PPP3CA	1
Increased Levels of LDH	release	Increased release of LDH	0.0418					EGLN1	1
Congenital Heart Anomaly	interrupted aortic arch	Interrupted aortic arch	0.0418					FOXC2	1
Cardiac Dysfunction	remodeling	Remodeling of left ventricle	0.0418					TLR2	1
Cardiac Proliferation	proliferation	Proliferation of cardiomyocytes	0.0444					TGFBR3,FOXC2	2
Congenital Heart Anomaly	Shprintzen syndrome	Shprintzen syndrome	0.0445					SLC6A2	1
Hepatocellular carcinoma, Liver Hyperplasia/Hyperproliferation	hepatocellular carcinoma	Locally advanced hepatocellular carcinoma	0.0472					PDGFRB	1
Cardiac Dysfunction	left ventricular dysfunction	Left ventricular dysfunction	0.0479					IBSP,PPP3CA,TLR2	3
Liver Damage	damage	Damage of liver cells	0.0499					IL1R1	1
Cardiac Infarction	acute myocardial infarction	Acute myocardial infarction	0.0514					PPP3CA,TLR2	2
Liver Inflammation/Hepatitis	experimental hepatitis	Experimental hepatitis	0.0526					IL23A	1
Renal Damage, Renal Tubule Injury	injury	Injury of renal tubule	0.0526					TLR2	1
Nephrosis	minimal change nephrotic syndrome	Minimal change nephrotic syndrome	0.0526					PPP3CA	1
Glomerular Injury, Renal Inflammation, Renal Nephritis	glomerulonephritis	Primary glomerulonephritis	0.0526					PPP3CA	1
Congenital Heart Anomaly	transposition	Transposition of great vessels	0.0526					TGFBR3	1
Cardiac Enlargement	hypertrophy	Hypertrophy of cardiomyocytes	0.055					TGFBR3,PPP3CA	2
Liver Necrosis/Cell Death	necrosis	Necrosis of liver	0.0573					JUN,ERCC1,TLR2	3
Liver Inflammation/Hepatitis	acute alcoholic hepatitis	Acute alcoholic hepatitis	0.058					IL1R1	1
Liver Inflammation/Hepatitis	chronic autoimmune hepatitis	Chronic autoimmune hepatitis	0.0607					PPP3CA	1
Cardiac Fibrosis	perivascular fibrosis	Perivascular fibrosis of heart	0.0607					TLR2	1
Glomerular Injury	abnormal morphology	Abnormal morphology of glomerular capillary	0.0687					FOXC2	1
Hepatocellular carcinoma, Liver Hyperplasia/Hyperproliferation	recurrent hepatocellular carcinoma	Recurrent hepatocellular carcinoma	0.0713					PDGFRA	1
Liver Necrosis/Cell Death	apoptosis	Apoptosis of hepatocytes	0.0719					JUN,ERCC1	2
Glomerular Injury, Renal Necrosis/Cell Death	apoptosis	Apoptosis of podocytes	0.0766					PPP3CA	1
Cardiac Necrosis/Cell Death	cell viability	Cell viability of cardiomyocytes	0.0766					ANGPT1	1
Hepatocellular carcinoma, Liver Hyperplasia/Hyperproliferation	metastatic hepatocellular carcinoma	Metastatic hepatocellular carcinoma	0.0766					PDGFRB	1
Increased Levels of Blood Urea Nitrogen	quantity	Increased Levels of Blood Urea Nitrogen	0.0792					IL1R1	1
Glomerular Injury, Renal Damage	injury	Injury of renal glomerulus	0.0818					IL23A	1
Cardiac Dysfunction	calcification	Calcification of aortic valve	0.0844					IBSP	1
Cardiac Dilation, Cardiac Enlargement	idiopathic dilated cardiomyopathy	Idiopathic dilated cardiomyopathy	0.0844					IL23A	1
Degeneration of liver	degeneration	Degeneration of liver	0.0922					ERCC1	1
Liver Hyperplasia/Hyperproliferation	liver adenoma	Hepatocellular adenoma	0.0922					TGFA	1
Glomerular Injury	abnormal morphology	Abnormal morphology of mesangium	0.1					FOXC2	1
Cardiac Hypoplasia	hypoplasia	Hypoplasia of trabeculae carne	0.1					TGFBR3	1
Glomerular Injury, Renal Inflammation, Renal Nephritis	glomerulonephritis	Glomerulonephritis	0.102					JUN,Cd24a,PPP3CA	3
Glomerular Injury, Renal Inflammation, Renal Nephritis	IgA nephropathy	IgA nephropathy	0.103					JUN	1
Cardiac Necrosis/Cell Death	apoptosis	Apoptosis of cardiomyocytes	0.109					EGLN1,ANGPT1	2
Liver Necrosis/Cell Death	cell death	Cell death of liver cell lines	0.115					JUN	1
Liver Fibrosis	activation	Activation of hepatic stellate cells	0.118					PDGFRB	1
Cardiac Fibrosis	fibrosis	Fibrosis of heart ventricle	0.12					TLR2	1
Bradycardia, Cardiac Arrythmia	bradycardia	Bradycardia	0.135					SLC6A2	1
Cardiac Inflammation	inflammation	Inflammation of heart	0.143					TGFA	1
Cardiac Dilation, Cardiac Enlargement	dilated cardiomyopathy	Dilated cardiomyopathy	0.147					IL23A,IL1R1,EGLN1	3
Liver Inflammation/Hepatitis	chronic hepatitis B	Chronic hepatitis B	0.152					IL23A	1
Liver Cholestasis	progressive familial intrahepatic cholestasis type 1	Progressive familial intrahepatic cholestasis type 1	0.159					LBP	1
Cardiac Arrythmia	ventricular fibrillation	Ventricular fibrillation	0.164					SLC6A2	1
Cardiac Infarction	ST-elevation myocardial infarction	ST-elevation myocardial infarction	0.183					IL1R1	1
Renal Necrosis/Cell Death	apoptosis	Apoptosis of kidney cell lines	0.186					TCF3,CDON	2
Cardiac Arteriopathy	coronary artery disease	Coronary artery disease	0.198					IL1R1,TLR2	2
Kidney Failure	acute renal failure	Acute renal failure	0.211					PPP3CA	1
Cardiac Arrythmia, Tachycardia	ventricular tachycardia	Ventricular tachycardia	0.224					SLC6A2	1
Liver Inflammation/Hepatitis, Liver Steatosis	steatohepatitis	Steatohepatitis	0.233					JUN	1
Increased Levels of Red Blood Cells	quantity	Increased Levels of Red Blood Cells	0.265					LGMN	1
Renal Damage	acute kidney injury	Acute kidney injury	0.273					LYZ	1
Cardiac Dysfunction, Cardiac Enlargement	hypertrophy	Hypertrophy of left ventricle	0.273					PPP3CA	1
Heart Failure	failure	Failure of heart	0.303					IL1R1,PPP3CA	2
Liver Damage	hepatic injury	Hepatic injury	0.32					TLR2	1
Liver Steatosis	nonalcoholic fatty liver disease	Nonalcoholic fatty liver disease	0.379					S100A4	1

## Sheet: Networks
Networks for My Projects->Shanta_4sc2->Meta_70 - 2021-08-17 12:18 PM
ID	Analysis	Molecules in Network	Score	Focus Molecules	Top Diseases and Functions
1	Meta_70 - 2021-08-17 12:18 PM	Alpha catenin,CDON,CG,COL6A1,Cd24a,Clec2d (includes others),Collagen Alpha1,EGLN1,ENO3,ERK1/2,Histone h3,Hsp90,IBSP,IFN Beta,IL12 (family),JUN,Jnk,KCNK5,LBP,LYZ,MSR1,N-cor,NDC80,NFkB (complex),P38 MAPK,PDGFA,PRDX1,Pka,SBK1,TCF3,TCR,TGFA,Tgf beta,USP43,estrogen receptor	38	19	Cancer, Endocrine System Disorders, Organismal Injury and Abnormalities
2	Meta_70 - 2021-08-17 12:18 PM	ANGPT1,Akt,Ap1,CD3,CD300LD,Ccl7,DCN,EFNB1,EPHB6,ERK,FOXC2,IL1,IL12 (complex),IL1R1,IL23A,Immunoglobulin,LDL,Mapk,Mek,Mlc,NBEAL2,PDGF BB,PDGFRA,PDGFRB,PI3K (complex),PI3K (family),RAS,RGS5,S100A4,SLC6A2,STAT5a/b,TGFBR3,TLR2,Vegf,p70 S6k	33	17	Cancer, Organismal Injury and Abnormalities, Cellular Movement
3	Meta_70 - 2021-08-17 12:18 PM	AHR,ATP7A,B4GALT6,CADM4,CCL18,CCL22,CLEC4D,CLEC6A,CP,CR1L,CST6,CTSA,DUSP10,Defb3,ECM1,EDNRB,EHD1,ERCC1,ID3,IFNG,IL20RB,IL36RN,LBP,LGMN,MMP2,ORM1,PCOLCE,PDGFRL,PLD4,RXRB,SOD3,Saa3,TCF,TNF,WLS	23	13	Cell-mediated Immune Response, Cellular Movement, Hematological System Development and Function
4	Meta_70 - 2021-08-17 12:18 PM	CCL18,CCS,CD1B,CD1C,CPD,CSRNP2,CTSC,DUSP22,ELF3,ERBB2,HOMER2,HPSE,IL13,IL4,Il3,KLC3,LFNG,LTBR,MOXD1,MS4A4A,MZB1,NR3C1,NT5DC3,PLET1,PLVAP,PPP3CA,PRSS22,PSEN1,RNA polymerase II,SPTA1,STAT5B,STT3B,TRAP1,YWHAG,ZFPM1	19	11	Cellular Development, Cellular Growth and Proliferation, Hematological System Development and Function
5	Meta_70 - 2021-08-17 12:18 PM	ANGPT1,BAIAP2L1,BCR (complex),CCND1,CDC37,CRTC2,DPY30,EPCAM,ETV5,FOXA2,FOXF1,GAB1,GAB2,GATA4,GLI2,IER5L,IKZF3,IRF2BP1,KDM6B,Klra2,MAP2K7,MEIS2,MS4A6A,PITX2,PRKAR1A,RAS,SETD2,SMO,SOX2,TCL1A,TEAD1,TRIM28,XPO5,ZFHX3,mir-34	9	6	Gene Expression, Cardiovascular System Development and Function, Embryonic Development
6	Meta_70 - 2021-08-17 12:18 PM	Glrp1,mir-223	2	1	Cellular Development, Cellular Growth and Proliferation, Hematological System Development and Function
7	Meta_70 - 2021-08-17 12:18 PM	Fcna,GATA6	2	1	Cancer, Cardiovascular Disease, Cell Cycle

## Sheet: ToxLists
Tox Lists for My Projects->Shanta_4sc2->Meta_70 - 2021-08-17 12:18 PM
Ingenuity Toxicity Lists	-log(p-value)	Ratio	Molecules
Hepatic Stellate Cell Activation	7.32	0.143	TGFA,PDGFRB,PDGFRA,TGFBR3,PDGFA
Hepatic Fibrosis	5.17	0.0228	TGFA,IL23A,PDGFRB,SLC6A2,DCN,PPP3CA,PDGFA,TLR2
Mechanism of Gene Regulation by Peroxisome Proliferators via PPARα	5.12	0.0526	JUN,PDGFRB,IL1R1,PDGFRA,PDGFA
LXR/RXR Activation	3.38	0.0325	LYZ,IL1R1,MSR1,LBP
Oxidative Stress	3.24	0.0526	JUN,SOD3,PRDX1
Increases Glomerular Injury	3.08	0.027	JUN,PDGFRB,Cd24a,TLR2
Long-term Renal Injury Anti-oxidative Response Panel (Rat)	2.93	0.111	SOD3,CP
Cardiac Hypertrophy	2.92	0.0143	JUN,EGLN1,TGFBR3,CTSC,PPP3CA,PDGFA
Cardiac Fibrosis	2.82	0.0169	JUN,PPP3CA,TLR2,CDON,RGS5
Positive Acute Phase Response Proteins	2.48	0.0667	CP,LBP
NF-κB Signaling	2.24	0.0105	TGFA,PDGFRB,IL1R1,PDGFRA,TGFBR3,TLR2
LPS/IL-1 Mediated Inhibition of RXR Function	2.23	0.0158	JUN,SOD3,IL1R1,LBP
Increases Liver Steatosis	2.2	0.0227	JUN,LBP,TLR2
Increases Liver Hyperplasia/Hyperproliferation	2.15	0.0217	TGFA,JUN,TLR2
Increases Renal Proliferation	1.99	0.0191	JUN,PDGFRB,TLR2
Cardiac Necrosis/Cell Death	1.9	0.0127	EGLN1,ANGPT1,PPP3CA,TLR2
Increases Renal Nephritis	1.86	0.0317	Cd24a,TLR2
Hepatic Cholestasis	1.78	0.0159	JUN,IL1R1,LBP
PPARα/RXRα Activation	1.75	0.0155	JUN,IL1R1,TGFBR3
Genes Upregulated in Response to Proteinuria-induced Oxidative Stress in Renal Proximal Tubule Cells (Human)	1.55	0.1	SOD3
Increases Liver Hepatitis	1.55	0.0217	JUN,IL1R1
Increases Liver Damage	1.52	0.0211	IL1R1,TLR2
NRF2-mediated Oxidative Stress Response	1.52	0.0126	JUN,SOD3,PRDX1
Renal Necrosis/Cell Death	1.49	0.008	TCF3,DCN,PPP3CA,TLR2,CDON
Increases Renal Damage	1.47	0.0196	IL1R1,TLR2
Recovery from Ischemic Acute Renal Failure (Rat)	1.41	0.0714	S100A4
Liver Proliferation	1.4	0.0113	TGFA,JUN,ERCC1
Genes associated with Chronic Allograft Nephropathy (Human)	1.24	0.0476	PDGFA
Liver Necrosis/Cell Death	1.17	0.00906	JUN,ERCC1,TLR2
Persistent Renal Ischemia-Reperfusion Injury (Mouse)	1.09	0.0333	LYZ
Acute Renal Failure Panel (Rat)	0.791	0.0161	JUN
Hypoxia-Inducible Factor Signaling	0.743	0.0143	JUN
VDR/RXR Activation	0.701	0.0128	PDGFA
Increases Cardiac Proliferation	0.686	0.0123	TGFBR3
TGF-β Signaling	0.609	0.0101	JUN
p53 Signaling	0.609	0.0101	JUN
Decreases Transmembrane Potential of Mitochondria and Mitochondrial Membrane	0.498	0.00746	TCF3
Aryl Hydrocarbon Receptor Signaling	0.434	0.00621	JUN
RAR Activation	0.368	0.0051	JUN
Xenobiotic Metabolism Signaling	0.2	0.00287	SOD3

## Sheet: AnalysisReady
Analysis Ready Molecules for My Projects->Shanta_4sc2->Meta_70 - 2021-08-17 12:18 PM
ID	Symbol	Expr Intensity/RPKM/FPKM/Counts	Expr Log Ratio	Expr p-value	Expr False Discovery Rate (q-value)
ENSMUSG00000022309	ANGPT1	262.82	1.42664	9.65748e-07	0.000757957
ENSMUSG00000038859	BAIAP2L1	189.931	-0.561342	0.000766915	0.0481109
ENSMUSG00000054793	CADM4	197.722	-0.401565	0.00205875	0.0835687
ENSMUSG00000035373	Ccl7	255.877	0.485173	0.00166545	0.0737693
ENSMUSG00000047139	Cd24a	3523.11	-0.351083	0.00183307	0.0776922
ENSMUSG00000034641	CD300LD	108.643	0.837531	3.90392e-08	7.73199e-05
ENSMUSG00000038119	CDON	5103.55	0.671071	6.58212e-06	0.0028517
ENSMUSG00000030157	Clec2d (includes others)	558.677	0.71223	0.00244955	0.0931522
ENSMUSG00000023349	CLEC6A	1065.47	0.598913	0.000287331	0.0278066
ENSMUSG00000001119	COL6A1	6537.07	0.615295	8.51373e-08	0.000121737
ENSMUSG00000003617	CP	14421.2	0.299795	0.00157735	0.0712597
ENSMUSG00000044636	CSRNP2	142.759	-0.65629	5.80911e-06	0.00268458
ENSMUSG00000030560	CTSC	6985.62	0.400107	0.00127651	0.0649877
ENSMUSG00000019929	DCN	1205.03	0.722054	1.29903e-05	0.00383186
ENSMUSG00000031217	EFNB1	624.264	-0.413357	0.000147733	0.0189425
ENSMUSG00000031987	EGLN1	1907.68	-0.313947	0.000202717	0.0234206
ENSMUSG00000024772	EHD1	4246.85	-0.389809	0.000124737	0.0175686
ENSMUSG00000060600	ENO3	2116	0.565875	3.08481e-06	0.00178199
ENSMUSG00000029869	EPHB6	782.612	-0.61234	2.39839e-05	0.00579017
ENSMUSG00000003549	ERCC1	2580.64	-0.372085	0.000604732	0.0413005
ENSMUSG00000026938	Fcna	170.704	1.34913	3.15726e-07	0.000312659
ENSMUSG00000046714	FOXC2	494.882	-0.517977	3.87408e-06	0.00206578
ENSMUSG00000062310	Glrp1	770.085	0.503682	8.02584e-05	0.0131427
ENSMUSG00000029306	IBSP	221.587	-0.927446	3.58514e-05	0.00770233
ENSMUSG00000007872	ID3	2043.98	-0.530358	8.00179e-06	0.00308158
ENSMUSG00000089762	IER5L	834.771	-0.517485	5.39228e-05	0.00996781
ENSMUSG00000026072	IL1R1	1447.58	0.29866	0.000144358	0.0187045
ENSMUSG00000025383	IL23A	471.119	-0.45354	0.00223268	0.0884398
ENSMUSG00000044030	IRF2BP1	1022.54	-0.418757	1.06974e-05	0.00361728
ENSMUSG00000052684	JUN	2571.24	-0.352295	0.0020141	0.0828611
ENSMUSG00000023243	KCNK5	344.927	-0.34363	0.00106747	0.0591334
ENSMUSG00000040714	KLC3	387.839	-0.784275	1.25702e-05	0.00378855
ENSMUSG00000030187	Klra2	243.695	0.885603	0.000127238	0.0175686
ENSMUSG00000016024	LBP	596.587	1.34123	0.00106501	0.0591334
ENSMUSG00000021190	LGMN	7206.76	0.274789	0.0013312	0.0654459
ENSMUSG00000069515	LYZ	86.9757	2.44617	6.2608e-06	0.00279999
ENSMUSG00000048696	MEX3D	954.333	-0.358182	0.000449671	0.0341159
ENSMUSG00000020000	MOXD1	4575.46	-0.577496	0.000276387	0.0272408
ENSMUSG00000101389	MS4A4A	546.929	0.568065	6.94947e-06	0.00291962
ENSMUSG00000024679	MS4A6A	1242.72	0.425745	0.00141741	0.0670684
ENSMUSG00000025044	MSR1	2580.11	0.640775	0.00027901	0.0272408
ENSMUSG00000056724	NBEAL2	1192.25	-0.592219	9.84076e-07	0.000757957
ENSMUSG00000024056	NDC80	386.494	0.437395	0.00234975	0.0915084
ENSMUSG00000054027	NT5DC3	606.353	-0.363443	0.000111754	0.0165155
ENSMUSG00000021223	PAPLN	241.984	-0.95294	4.91471e-11	2.27125e-07
ENSMUSG00000029718	PCOLCE	3661.13	0.322036	0.000303286	0.0286038
ENSMUSG00000025856	PDGFA	1664.45	0.299757	0.00041579	0.0331294
ENSMUSG00000029231	PDGFRA	2209.62	0.486209	3.61116e-05	0.00770233
ENSMUSG00000024620	PDGFRB	1873.53	0.81548	3.288e-05	0.00723568
ENSMUSG00000031595	PDGFRL	2706.35	0.371694	4.91945e-05	0.00960609
ENSMUSG00000052160	PLD4	1618.77	0.255886	0.00155572	0.0709489
ENSMUSG00000032068	PLET1	464.752	-0.454224	0.00134343	0.0658137
ENSMUSG00000034845	PLVAP	1008.82	0.373706	0.000327164	0.0302124
ENSMUSG00000028161	PPP3CA	2588.13	0.413294	0.00179791	0.0769327
ENSMUSG00000028691	PRDX1	8575.56	0.23809	0.00137904	0.0661639
ENSMUSG00000045027	PRSS22	1444.28	-0.568307	4.12935e-05	0.00821934
ENSMUSG00000026678	RGS5	1660.16	0.637837	0.00039765	0.0330121
ENSMUSG00000001020	S100A4	187.438	1.20244	2.80657e-05	0.00643955
ENSMUSG00000042978	SBK1	877.948	-0.537679	8.07743e-12	5.59928e-08
ENSMUSG00000055368	SLC6A2	721.927	1.28569	1.37462e-09	4.76442e-06
ENSMUSG00000072941	SOD3	572.083	1.45374	5.45664e-09	1.51302e-05
ENSMUSG00000020167	TCF3	3313.37	-0.271851	0.000889826	0.0531697
ENSMUSG00000029999	TGFA	1196.97	-0.683713	1.63721e-07	0.000189152
ENSMUSG00000029287	TGFBR3	1144.65	0.545655	3.68815e-05	0.00774735
ENSMUSG00000027995	TLR2	556.865	0.540841	9.98786e-06	0.00346179
ENSMUSG00000020905	USP43	589.06	-0.425052	0.000171424	0.0206663
ENSMUSG00000028173	WLS	3441.61	0.328137	0.0026936	0.0980158
ENSMUSG00000049577	ZFPM1	898.15	-0.366603	0.00121653	0.0634251

## Sheet: CausalNetworks
Causal Networks for My Projects->Shanta_4sc2->Meta_70 - 2021-08-17 12:18 PM
Master Regulator	Molecule Type	Expr Log Ratio	Depth	Predicted Activation State	Notes	Activation z-score	p-value of overlap	Network bias-corrected p-value	Participating regulators	Target molecules in dataset	Causal network	Target-connected regulators	Relationships Between Master Regulators(Increases/Downstream)	Relationships Between Master Regulators(Decreases/Downstream)	Relationships Between Master Regulators(Affects/Downstream)	Relationships Between Master Regulators(Increases/Upstream)	Relationships Between Master Regulators(Decreases/Upstream)	Relationships Between Master Regulators(Affects/Upstream)	Relationships Between Master Regulators(Increases/Both)	Relationships Between Master Regulators(Decreases/Both)	Relationships Between Master Regulators(Affects/Both)
ADRB2	G-protein coupled receptor		2			0	7.14e-10	0.0087	ADRB2,AKT1,Creb,ERK,NFkB (complex),NFKBIA,NR3C1,PTH,TNF	ANGPT1,Ccl7,Cd24a,COL6A1,CTSC,DCN,EHD1,ERCC1,FOXC2,IL1R1,IL23A,LBP,MSR1,PCOLCE,PDGFA,PDGFRA,PDGFRB,TGFA,TLR2,WLS	20 (9)	8		CD44,FDPS,Pka		CCR2,PDGFB,PTH
MFNG	enzyme		3			-0.218	2.81e-09	0.0233	Akt,AKT1,EGFR,ERK,IKBKB,MAPK1,MFNG,MTOR,NFkB (complex),NOTCH1,NOTCH3,PDPK1,RELA,RUNX2,STAT3	Ccl7,Cd24a,CDON,CP,DCN,EGLN1,EHD1,ENO3,ERCC1,IBSP,IL1R1,IL23A,MSR1,PDGFA,PDGFRA,PDGFRB,S100A4,SOD3,TGFA,TGFBR3,TLR2	21 (15)	14					NOTCH1,NOTCH3
BRCA1	transcription regulator		3			-1	3.2e-09	0.0041	AHR,Akt,BRCA1,CCND1,CDK2,CEBPB,CHEK1,CHUK,CTNNB1,E2F3,ERK1/2,ESR1,ESR2,GATA1,GLI1,H2AX,HOXA10,JAK2,MAPK8,MAPK9,MYC,NOTCH1,PDGFRB,PPARGC1A,STAT3,STAT5B,TP53,TWIST1	ANGPT1,BAIAP2L1,Ccl7,Cd24a,CDON,Clec2d (includes others),COL6A1,CP,CTSC,DCN,ENO3,EPHB6,ERCC1,FOXC2,ID3,IER5L,IL1R1,IL23A,JUN,Klra2,LBP,LGMN,LYZ,MOXD1,MSR1,NDC80,PDGFA,PDGFRA,PDGFRB,PDGFRL,PPP3CA,RGS5,SOD3,TGFBR3,WLS,ZFPM1	36 (28)	25		HMGA1		ATR,COL18A1,Cyclin E,DDIT4	EGR1,NOTCH1
Erm	group		3			-1.043	3.33e-09	0.0146	Akt,ATF2,CDC42,CTNNB1,ENAH,ERK,Erm,ESR1,IKBKB,Mapk,MAPK1,P38 MAPK,Pka,STAT1,STAT6,VASP	Cd24a,Clec2d (includes others),CP,DCN,EGLN1,EHD1,ENO3,ERCC1,FOXC2,IL1R1,IL23A,JUN,LBP,PDGFA,PDGFRA,PDGFRB,PPP3CA,S100A4,SLC6A2,SOD3,TCF3,TGFA,TLR2	23 (16)	12				Pka
CSF2RB	transmembrane receptor		3			-0.557	3.58e-09	0.0046	AKT1,CCND1,CEBPB,CHUK,CLOCK,Creb,CSF2RB,CTNNB1,DUSP1,ERK,estrogen receptor,GAB2,HIF1A,IKBKB,Mapk,MAPK1,NFkB (complex),NFKB1,NOS3,NR3C1,P38 MAPK,RELA,STAT3,STIM1,TNFRSF1A,TSC2	ANGPT1,Ccl7,Cd24a,CDON,COL6A1,DCN,EGLN1,EHD1,ENO3,ERCC1,FOXC2,IL23A,JUN,Klra2,LBP,LGMN,MOXD1,MSR1,PCOLCE,PDGFRA,PDGFRB,PRDX1,RGS5,SLC6A2,SOD3,TCF3,TGFA,TGFBR3,TLR2	29 (26)	26	AHR,ID2,OGA
COP1	enzyme		3			-1.134	3.66e-09	0.0096	Akt,CCND1,CEBPB,COP1,Creb,CTNNB1,DUSP1,ERK,FOSL1,FOXO1,FOXO3,MTOR,NFAT5,NFkB (complex),NOS2,NOS3,NR3C1,PDGFRB,PPARGC1A,RELA,SFN,SP1,STAT1,STAT3,STIM1,TNFRSF1A,TSC2,YY1	ANGPT1,Ccl7,Cd24a,CDON,COL6A1,CP,DCN,EHD1,ERCC1,FOXC2,ID3,IL1R1,IL23A,JUN,Klra2,LBP,LGMN,MSR1,PCOLCE,PDGFRB,PDGFRL,PPP3CA,PRDX1,RGS5,SOD3,TCF3,TGFA,TLR2	28 (28)	27
RXRA	ligand-dependent nuclear receptor		3			1.177	4.21e-09	0.0192	Akt,Ap1,CTNNB1,ERK,EZH2,FOXO1,FOXO3,JUN,MAPK1,MTOR,NFAT5,NFkB (complex),NOS3,NR1I3,PDGFRB,PPARGC1A,RELA,RXRA,SP1,STAT1,STAT3,THRA,TSC2	ANGPT1,Cd24a,CDON,CP,CTSC,DCN,EHD1,ENO3,ERCC1,FOXC2,IBSP,IL1R1,IL23A,JUN,LYZ,PDGFA,PDGFRA,PDGFRB,PDGFRL,PPP3CA,RGS5,S100A4,SOD3,TCF3,TGFA,TLR2	26 (23)	23	GLI1				Ap1,CXCL1,PDGFB,PMP22
CD44	other		2			0.655	4.64e-09	0.0134	Akt,CD44,ESR1,GAB1,MAPK1,MAPKAPK2,P38 MAPK,PIK3CA,PIK3CG,PRKCE,PTK2,TGFB1,TWIST1	ANGPT1,Ccl7,Clec2d (includes others),CP,DCN,EGLN1,EHD1,ENO3,EPHB6,ERCC1,IL1R1,LBP,MSR1,PDGFA,PDGFRA,PDGFRB,S100A4,SLC6A2,SOD3,TGFBR3,TLR2	21 (13)	13	EGR1,GLI1,NFKB1,NOTCH1,Pka,TNFRSF1A	DKK1,OGA		CCR2,MAPKAPK2,PIK3CA,PIK3CG,RAF1,RAS	ADRB2
PTP4A2	phosphatase		3			-1.134	4.76e-09	0.0067	Akt,CCND1,CEBPB,Creb,CTNNB1,DUSP1,ERK,EZR,FOSL1,FOXO1,FOXO3,Mapk,MTOR,NFAT5,NFkB (complex),NOS2,NOS3,PDGFRB,Pka,PPARGC1A,PTP4A2,RELA,SP1,STAT1,STAT3,STIM1,TNFRSF1A,TSC2,YY1	ANGPT1,Ccl7,Cd24a,CDON,CP,DCN,EHD1,ERCC1,FOXC2,ID3,IL1R1,IL23A,JUN,Klra2,LBP,LGMN,MSR1,PCOLCE,PDGFRB,PDGFRL,PPP3CA,PRDX1,RGS5,SLC6A2,SOD3,TCF3,TGFA,TLR2	28 (29)	27
IL10RA	transmembrane receptor		3			0.655	5.48e-09	0.038	Akt,CHUK,ERK,GSK3B,IL10RA,Mapk,MAPK1,STAT1,STAT3,TP63	Ccl7,Cd24a,CDON,CP,DCN,EHD1,ENO3,ERCC1,FOXC2,ID3,IL1R1,IL23A,JUN,PCOLCE,PDGFA,PDGFRA,PDGFRB,S100A4,SLC6A2,SOD3,TLR2	21 (10)	10	ID2			DKK1,PMP22	DDIT4
SPHK1	kinase		2			-1.606	6.92e-09	0.0179	Akt,AKT1,Ap1,CHUK,CTNNB1,ERK1/2,IKBKB,MAPK1,MAPK8,NFkB (complex),NRAS,P38 MAPK,PTK2,RAC1,SPHK1	Cd24a,CP,DCN,EGLN1,EHD1,ENO3,ERCC1,FOXC2,IL1R1,IL23A,JUN,LBP,PDGFRA,PDGFRB,PPP3CA,SLC6A2,SOD3,TCF3,TLR2	19 (15)	14				Ap1,HRAS
ZDHHC6	enzyme		3			0.962	9.28e-09	0.0124	Akt,CCND1,CEBPB,Creb,CTNNB1,DUSP1,ERK,FOSL1,FOXO1,FOXO3,MTOR,NFAT5,NFkB (complex),NOS2,NOS3,PDGFRB,PPARGC1A,RELA,SP1,STAT1,STAT3,STIM1,TNFRSF1A,TSC2,YY1,ZDHHC6	ANGPT1,Ccl7,Cd24a,CDON,CP,DCN,EHD1,ERCC1,FOXC2,ID3,IL1R1,IL23A,JUN,Klra2,LBP,LGMN,MSR1,PCOLCE,PDGFRB,PDGFRL,PPP3CA,PRDX1,RGS5,SOD3,TCF3,TGFA,TLR2	27 (26)	25
FDPS	enzyme		3			-0.962	9.35e-09	0.0124	Akt,CCND1,CEBPB,Creb,CTNNB1,DUSP1,ERK,FDPS,FOSL1,FOXO1,FOXO3,MTOR,NFAT5,NFkB (complex),NOS2,NOS3,PDGFRB,PPARGC1A,RELA,SP1,STAT1,STAT3,STIM1,TNFRSF1A,TSC2,YY1	ANGPT1,Ccl7,Cd24a,CDON,CP,DCN,EHD1,ERCC1,FOXC2,ID3,IL1R1,IL23A,JUN,Klra2,LBP,LGMN,MSR1,PCOLCE,PDGFRB,PDGFRL,PPP3CA,PRDX1,RGS5,SOD3,TCF3,TGFA,TLR2	27 (26)	25		OGA			ADRB2
NOTCH3	transcription regulator		3			-0.192	1e-08	0.0133	Akt,CCND1,CEBPB,Creb,CTNNB1,DUSP1,ERK,FOSL1,FOXO1,FOXO3,MTOR,NFAT5,NFkB (complex),NOS2,NOS3,NOTCH3,PDGFRB,PPARGC1A,RELA,SP1,STAT3,STIM1,TNFRSF1A,TSC2,YY1	ANGPT1,Ccl7,Cd24a,CDON,CP,DCN,EHD1,ERCC1,FOXC2,ID3,IL1R1,IL23A,JUN,Klra2,LBP,LGMN,MSR1,PCOLCE,PDGFRB,PDGFRL,PPP3CA,PRDX1,RGS5,SOD3,TCF3,TGFA,TLR2	27 (25)	25	AHR,Notch	ALOX15,MFNG		PTX3	NOTCH1
RNF40	enzyme		3			0.962	1e-08	0.0135	Akt,CCND1,CEBPB,Creb,CTNNB1,DUSP1,ERK,FOSL1,FOXO1,FOXO3,MTOR,NFAT5,NFkB (complex),NOS2,NOS3,PDGFRB,PPARGC1A,RELA,RNF40,SP1,STAT1,STAT3,STIM1,TNFRSF1A,TSC2,YY1	ANGPT1,Ccl7,Cd24a,CDON,CP,DCN,EHD1,ERCC1,FOXC2,ID3,IL1R1,IL23A,JUN,Klra2,LBP,LGMN,MSR1,PCOLCE,PDGFRB,PDGFRL,PPP3CA,PRDX1,RGS5,SOD3,TCF3,TGFA,TLR2	27 (26)	25
GRB7	other		3			-1.633	1.02e-08	0.0239	Akt,AKT1,Ap1,CEBPB,CHUK,CTNNB1,ERK,ERK1/2,ETS1,FOS,GATA1,GRB7,JUN,Mapk,MAPK1,MTOR,NADPH oxidase,NOS3,PIK3CG,PRKAA1,RAS,RELA,SMAD1,SMAD1/5,SP1,STAT3	CDON,CP,CTSC,DCN,EGLN1,ENO3,EPHB6,ERCC1,IBSP,ID3,IL1R1,JUN,LGMN,MSR1,PDGFA,PDGFRB,PPP3CA,S100A4,SLC6A2,SOD3,TCF3,TGFA,TLR2,ZFPM1	24 (26)	24				RAS
NFKB1	transcription regulator		2			0.243	1.03e-08	0.0093	Creb,FOXO3,IKBKB,MAP2K1,MAP3K8,MAPK1,NFkB (complex),NFKB1	ANGPT1,Ccl7,Cd24a,CP,DCN,EGLN1,EHD1,ENO3,ERCC1,IL1R1,IL23A,PCOLCE,PDGFRA,S100A4,SBK1,SOD3,TLR2	17 (8)	8	LTBR,NOTCH1,SMO,STUB1,TICAM1,TNFRSF1A	PTX3,SIGIRR		CD44,EGR1,IGHM
RAPGEF2	other		3			-1.633	1.03e-08	0.0239	Akt,AKT1,Ap1,CEBPB,CHUK,CTNNB1,ERK,ERK1/2,ETS1,FOS,GATA1,JUN,Mapk,MAPK1,MTOR,NADPH oxidase,NOS3,PIK3CG,PRKAA1,RAPGEF2,RAS,RELA,SMAD1,SMAD1/5,SP1,STAT3	CDON,CP,CTSC,DCN,EGLN1,ENO3,EPHB6,ERCC1,IBSP,ID3,IL1R1,JUN,LGMN,MSR1,PDGFA,PDGFRB,PPP3CA,S100A4,SLC6A2,SOD3,TCF3,TGFA,TLR2,ZFPM1	24 (26)	24				RAS
SHC4	other		3			-1.633	1.03e-08	0.0239	Akt,AKT1,Ap1,CEBPB,CHUK,CTNNB1,ERK,ERK1/2,ETS1,FOS,GATA1,JUN,Mapk,MAPK1,MTOR,NADPH oxidase,NOS3,PIK3CG,PRKAA1,RAS,RELA,SHC4,SMAD1,SMAD1/5,SP1,STAT3	CDON,CP,CTSC,DCN,EGLN1,ENO3,EPHB6,ERCC1,IBSP,ID3,IL1R1,JUN,LGMN,MSR1,PDGFA,PDGFRB,PPP3CA,S100A4,SLC6A2,SOD3,TCF3,TGFA,TLR2,ZFPM1	24 (26)	24				RAS
RASGRP3	other		3			-1.633	1.06e-08	0.0246	Akt,AKT1,Ap1,CEBPB,CHUK,CTNNB1,ERK,ERK1/2,ETS1,FOS,GATA1,JUN,Mapk,MAPK1,MTOR,NADPH oxidase,NOS3,PIK3CG,PRKAA1,RAS,RASGRP3,RELA,SMAD1,SMAD1/5,SP1,STAT3	CDON,CP,CTSC,DCN,EGLN1,ENO3,EPHB6,ERCC1,IBSP,ID3,IL1R1,JUN,LGMN,MSR1,PDGFA,PDGFRB,PPP3CA,S100A4,SLC6A2,SOD3,TCF3,TGFA,TLR2,ZFPM1	24 (26)	24				RAS
STAT	group		3			-0.557	1.15e-08	0.0035	AKT1,CCND1,CEBPB,CHUK,CLOCK,Creb,CTNNB1,DUSP1,ERK,FOSL1,FOXO1,FOXO3,FOXO4,HMOX1,MAPK1,NFkB (complex),NOS3,P38 MAPK,RELA,STAT,STAT3,STIM1,TNFRSF1A,TP53,TSC2,YY1	ANGPT1,Ccl7,Cd24a,CDON,DCN,EGLN1,EHD1,ENO3,FOXC2,ID3,IL23A,JUN,Klra2,LBP,LGMN,MOXD1,MSR1,NDC80,PCOLCE,PDGFRA,PDGFRB,PPP3CA,PRDX1,RGS5,SLC6A2,SOD3,TCF3,TGFA,TLR2	29 (26)	25
TICAM1	other		2			-0.447	1.22e-08	0.0193	IL1B,IL6,MAP3K8,NFkB (complex),RELA,STAT1,TICAM1,TNF	ANGPT1,Cd24a,CTSC,DCN,EGLN1,EHD1,ERCC1,FOXC2,IBSP,IL1R1,IL23A,LBP,LYZ,PDGFA,PDGFRA,PDGFRB,SBK1,TGFA,TLR2,WLS	20 (8)	8				AGTR1,EGR1,MAPKAPK2,MEFV,NFKB1
NOTCH1	transcription regulator		2			0	1.25e-08	0.0404	Akt,AKT1,EGFR,IKBKB,MAPK1,MTOR,NFkB (complex),NOTCH1,PDPK1,RELA,RUNX2,STAT3	Ccl7,Cd24a,CDON,CP,DCN,EGLN1,EHD1,ENO3,ERCC1,IBSP,IL1R1,IL23A,PDGFA,PDGFRA,PDGFRB,S100A4,SOD3,TGFA,TGFBR3,TLR2	20 (12)	12	AHR,PMP22,PSEN1,PSEN2	BRCA1,MFNG,NOTCH3		CD44,ID2,NFKB1,PDGFB	CXCL1,MMP1
CXCL1	cytokine		3			-1.4	1.25e-08	0.0441	Akt,AKT1,Ap1,CDC42,CEBPB,CTNNB1,CXCL1,ERK,ERK1/2,ESR1,ETS1,FOS,FOSL1,GATA1,JUN,MTOR,NADPH oxidase,NFkB (complex),NOS3,P38 MAPK,PAK1,PRKAA1,RELA,SMAD1/5,STAT3	Cd24a,CDON,Clec2d (includes others),CP,CTSC,EGLN1,EHD1,ERCC1,FOXC2,IBSP,ID3,IL1R1,IL23A,JUN,LBP,LGMN,MSR1,PDGFRB,PPP3CA,S100A4,SLC6A2,SOD3,TCF3,TGFA,ZFPM1	25 (25)	22	TNFRSF1A	NOTCH1,RXRA		Ap1
NIBAN2	transcription regulator		3			-0.209	1.26e-08	0.0269	Akt,CASP8,CHUK,CTNNB1,EZH2,HRAS,IKBKB,JUN,MAPK1,Mek,MYC,NIBAN2,P38 MAPK,PTGS2,TBK1,TCF7L2	ANGPT1,Ccl7,CP,DCN,EGLN1,EHD1,ENO3,ERCC1,FOXC2,IBSP,ID3,IL1R1,JUN,MSR1,PDGFA,PDGFRB,PPP3CA,SLC6A2,SOD3,TCF3,TGFA,TLR2,WLS	23 (16)	13				HRAS
STC1	kinase		3			0.577	1.37e-08	0.0158	Ap1,CDKN1A,Creb,CTNNB1,DUSP1,EGFR,EIF4E,ERK,FOS,H2AX,HMGA1,Mapk,MAPK1,MAPK3,Mek,NFE2L2,NFkB (complex),NR3C1,PARP1,PDGFRB,PPARG,RARA,STC1,TCF7L2,TNFRSF1A	ANGPT1,Cd24a,COL6A1,CP,EHD1,ENO3,ERCC1,FOXC2,IBSP,ID3,IL23A,JUN,LBP,LYZ,PCOLCE,PDGFA,PDGFRA,PDGFRB,PPP3CA,PRDX1,RGS5,S100A4,SLC6A2,SOD3,TCF3,TGFA,TLR2	27 (25)	23
LILRB4	other		2			0.577	1.4e-08	0.0043	Akt,CHUK,IKBKB,LILRB4,NFKBIA,P38 MAPK	Ccl7,CP,DCN,EGLN1,FOXC2,IL1R1,IL23A,JUN,S100A4,SLC6A2,SOD3,TLR2	12 (6)	5
IL22	cytokine		3			-1.3	1.45e-08	0.0283	Akt,CHUK,CTNNB1,estrogen receptor,EZH2,FOXO1,FOXO3,IL22,JUN,Mapk,MAPK1,NFAT5,NFkB (complex),NOS3,PDGFRB,PPARGC1A,RELA,SP1,STAT1,STAT3,STAT5A,STAT5B,TP53,TP63,TSC2	ANGPT1,Cd24a,CDON,COL6A1,CTSC,EHD1,ENO3,FOXC2,IBSP,ID3,IL1R1,IL23A,JUN,LBP,LYZ,MOXD1,NDC80,PDGFA,PDGFRA,PDGFRB,PDGFRL,PPP3CA,RGS5,S100A4,SLC6A2,SOD3,TCF3,TGFBR3,TLR2	29 (25)	24	AHR,CARD9,CBFB,CCR2,TNFRSF1A			Muc1
STUB1	enzyme		2			0.392	1.48e-08	0.0169	AHR,AR,EIF4E,ERBB2,MAPT,MYC,NOS2,NOS3,SRC,STUB1,TBK1,TP53	ANGPT1,Ccl7,Cd24a,COL6A1,CP,CTSC,DCN,EGLN1,EHD1,ENO3,ERCC1,ID3,IL1R1,JUN,LBP,LYZ,MSR1,NDC80,PDGFA,PPP3CA,S100A4,SOD3,TCF3,TGFA,TLR2,WLS	26 (12)	11				ATG16L1,NFKB1	AHR
BAP1	peptidase		3			0.962	1.58e-08	0.0174	Akt,BAP1,CCND1,CEBPB,Creb,CTNNB1,DUSP1,E2F3,ERK,FOSL1,FOXO1,FOXO3,Gamma tubulin,MTOR,NFAT5,NFkB (complex),NOS2,NOS3,PDGFRB,PPARGC1A,RELA,SP1,STAT1,STAT3,STIM1,TNFRSF1A,TSC2	ANGPT1,BAIAP2L1,Ccl7,Cd24a,CDON,CP,DCN,EHD1,ERCC1,FOXC2,IL1R1,IL23A,JUN,Klra2,LBP,LGMN,MSR1,PCOLCE,PDGFRB,PDGFRL,PPP3CA,PRDX1,RGS5,SOD3,TCF3,TGFA,TLR2	27 (27)	25	ATM
GPR17	G-protein coupled receptor		3			0.853	1.83e-08	0.0396	Akt,Creb,CTNNB1,ERK,ESR1,GPR17,IKBKB,MAPK1,P38 MAPK,Pka,STAT1	Clec2d (includes others),CP,DCN,EGLN1,EHD1,ENO3,ERCC1,FOXC2,IL1R1,IL23A,JUN,LBP,PCOLCE,PDGFA,PDGFRB,PPP3CA,S100A4,SLC6A2,SOD3,TCF3,TGFA,TLR2	22 (11)	10					Pka
FABP3	transporter		3			0.626	2.09e-08	0.0369	ATF2,CAMK2A,CCND1,CEBPB,Creb,CTNNB1,DUSP1,ERK,FABP3,FOSL1,MTOR,NFkB (complex),NOS2,PTK2,RELA,STAT3,STIM1,TNFRSF1A,YY1	Ccl7,Cd24a,CDON,CP,EGLN1,EHD1,ERCC1,FOXC2,ID3,IL23A,JUN,Klra2,LBP,LGMN,MSR1,PCOLCE,PDGFRA,PDGFRB,PPP3CA,PRDX1,TCF3,TGFA,TLR2	23 (19)	17		OGA
PDE10A	enzyme		3			-0.426	2.86e-08	0.0353	ATF2,CCND1,CEBPB,Creb,CTNNB1,DUSP1,ERK,FOSL1,MTOR,NFkB (complex),NOS2,PDE10A,RELA,STAT3,STIM1,TNFRSF1A,YY1	Ccl7,Cd24a,CDON,CP,EGLN1,EHD1,ERCC1,FOXC2,ID3,IL23A,JUN,Klra2,LBP,LGMN,MSR1,PCOLCE,PDGFRA,PPP3CA,PRDX1,TCF3,TGFA,TLR2	22 (17)	16	Pka
Pka	complex		2			-1.091	3.1e-08	0.0441	Akt,CTNNB1,ERK,ESR1,IKBKB,MAPK1,P38 MAPK,Pka,STAT1	Clec2d (includes others),CP,DCN,EGLN1,EHD1,ENO3,ERCC1,FOXC2,IL1R1,IL23A,JUN,LBP,PDGFA,PDGFRB,PPP3CA,S100A4,SLC6A2,SOD3,TCF3,TGFA,TLR2	21 (9)	9	AHR,Erm,PTH	GPR17		CD44,EGR1,PDE10A,PP1 protein complex group,RAF1	ADRB2
ID2	transcription regulator		3			1.877	3.23e-08	0.0251	Akt,CTNNB1,EIF4E,EIF4EBP1,ERK,EZH2,FOXO1,FOXO3,ID2,JUN,MTOR,NFAT5,NFkB (complex),NOS3,PDGFRB,PPARGC1A,RELA,SP1,STAT1,TSC2	ANGPT1,Cd24a,CP,CTSC,DCN,ERCC1,FOXC2,IBSP,ID3,IL1R1,LYZ,PDGFA,PDGFRA,PDGFRB,PDGFRL,PPP3CA,RGS5,S100A4,SOD3,TCF3,TGFA,TGFBR3,TLR2	23 (20)	19	BMPR2,NOTCH1,PAX7	ARHGAP31		CCR2,CSF2RB,FLT3LG,IL10RA,TNFRSF1A	ITGB5
RAF1	kinase		2			-0.943	3.48e-08	0.0286	CHUK,ERK,FOXO1,IKBKB,MAP2K1/2,MAPK1,Mek,P38 MAPK,RAF1,RELA	ANGPT1,CP,DCN,EGLN1,EHD1,ENO3,ERCC1,FOXC2,IL1R1,IL23A,PDGFA,PDGFRA,PDGFRB,S100A4,SLC6A2,SOD3,TGFA,TLR2	18 (10)	10	CD44,Pak,Pka,RAS			MMP1
ARTN	growth factor		3			-0.962	3.51e-08	0.0242	Akt,ARTN,CCND1,CEBPB,Creb,CTNNB1,DUSP1,ERK,ESR1,FOSL1,FOXO1,FOXO3,MTOR,NFAT5,NFkB (complex),NOS3,PDGFRB,PPARGC1A,PTK2,RELA,RET,SP1,STAT1,STAT3,STIM1,TNFRSF1A,TSC2,YY1	ANGPT1,Ccl7,Cd24a,CDON,Clec2d (includes others),DCN,EHD1,ERCC1,FOXC2,ID3,IL1R1,IL23A,JUN,Klra2,LBP,LGMN,MSR1,PCOLCE,PDGFRB,PDGFRL,PPP3CA,PRDX1,RGS5,SOD3,TCF3,TGFA,TLR2	27 (28)	26
RBBP4	enzyme		3			-0.426	3.64e-08	0.0244	ATF2,CCND1,CEBPB,CHUK,Creb,DUSP1,ERK,Mapk,MAPK1,MTOR,PIK3CG,RAS,RBBP4,RELA,STAT3,STIM1,TNFRSF1A,YY1	Ccl7,CDON,DCN,EGLN1,ENO3,EPHB6,ERCC1,FOXC2,ID3,IL23A,JUN,Klra2,LBP,LGMN,MSR1,PCOLCE,PDGFRA,PRDX1,SLC6A2,SOD3,TGFA,TLR2	22 (18)	16				RAS
PITX1	transcription regulator		3			0.426	3.67e-08	0.0245	ATF2,CCND1,CEBPB,CHUK,Creb,DUSP1,ERK,Mapk,MAPK1,MTOR,PIK3CG,PITX1,RAS,RELA,STAT3,STIM1,TNFRSF1A,YY1	Ccl7,CDON,DCN,EGLN1,ENO3,EPHB6,ERCC1,FOXC2,ID3,IL23A,JUN,Klra2,LBP,LGMN,MSR1,PCOLCE,PDGFRA,PRDX1,SLC6A2,SOD3,TGFA,TLR2	22 (18)	16					RAS
ATM	kinase		2			1.043	4.3e-08	0.036	Akt,ATM,Creb,H2AX,IKBKB,IKBKG,Jnk,JUN,Map3k7,MAPK1,MEF2D,NFkB (complex),RELA,TP53,ZEB1	ANGPT1,Ccl7,Cd24a,CP,DCN,EGLN1,EHD1,FOXC2,IBSP,ID3,IL1R1,IL23A,JUN,LYZ,NDC80,PCOLCE,PDGFA,PDGFRA,PDGFRB,PPP3CA,SOD3,TGFA,TLR2	23 (15)	15	HMGA1			BAP1	CDKN2D
HMGA1	transcription regulator		3			-1.768	4.8e-08	0.0218	Akt,Ap1,CCND1,CEBPB,CTNNB1,ERK,estrogen receptor,FOSL1,GLI1,HMGA1,Mapk,MMP9,NFkB (complex),P38 MAPK,PDGFRB,PPARGC1A,STAT3,STIM1,TNFRSF1A,TP53	Ccl7,Cd24a,CDON,COL6A1,CP,DCN,EHD1,ENO3,EPHB6,ERCC1,FOXC2,ID3,IER5L,IL1R1,IL23A,JUN,Klra2,LBP,LGMN,LYZ,MSR1,NDC80,PDGFA,PDGFRA,PDGFRB,PDGFRL,PPP3CA,PRDX1,RGS5,SLC6A2,TCF3,TGFBR3	32 (20)	19	CIP2A,PDGFB			Ap1,ATM	BRCA1,NFIB
PIK3CG	kinase		2			-0.943	5.73e-08	0.0473	Akt,AKT1,CEBPB,ERK,MAPK1,NFkB (complex),NOS3,P38 MAPK,PAK2,PDPK1,PIK3CG,RELA	Cd24a,CTSC,EGLN1,EHD1,ENO3,EPHB6,ERCC1,ID3,IL1R1,LGMN,MSR1,PDGFA,PDGFRA,PDGFRB,SLC6A2,SOD3,TGFA,TLR2	18 (12)	12	CD44,Gpcr,RAS	PIK3CA
Gpcr	group		2			-1	6.31e-08	0.0334	Akt,EGFR,Gpcr,IKBKB,MAPK1,NFkB (complex),PIK3CG,PRKD1	Ccl7,Cd24a,CP,DCN,EGLN1,EHD1,ENO3,EPHB6,ERCC1,IBSP,IL1R1,JUN,S100A4,SOD3,TGFA,TLR2	16 (8)	8				PIK3CG
NDUFV1	enzyme		3			-0.192	6.49e-08	0.0311	Creb,INSR,IRS1,JUN,Mapk,MAPK1,MYC,NDUFV1,NFkB (complex),P38 MAPK,PPARGC1A,RELA,SIRT1,STAT3,TIMP3,TP53	Ccl7,Cd24a,CDON,CP,CTSC,DCN,EGLN1,EHD1,ENO3,ERCC1,IBSP,ID3,LYZ,MSR1,NDC80,PCOLCE,PDGFRA,PDGFRL,PPP3CA,S100A4,SLC6A2,SOD3,TCF3,TGFA,TGFBR3,TLR2,WLS	27 (16)	14
DKK1	growth factor		3			-0.626	6.98e-08	0.0473	Ap1,ATF2,CEBPB,CHUK,Creb,DKK1,EGR1,ERK,GSK3B,HIF1A,JUN,MAP2K1,MAPT,MTOR,MYC,NFkB (complex),P38 MAPK,PSEN1,RELA,STAT3	ANGPT1,Ccl7,Cd24a,CDON,CP,CTSC,DCN,EGLN1,ERCC1,FOXC2,IBSP,JUN,LGMN,LYZ,PCOLCE,PDGFRA,PLVAP,S100A4,SLC6A2,SOD3,TCF3,TGFA,WLS	23 (20)	19	DNAJB6,IL10RA				CD44
RAS	group		2			-0.775	7.05e-08	0.0302	Akt,Ap1,CHUK,ERK,ERK1/2,Mapk,MAPK1,MAPK7,NFkB (complex),PIK3CG,RAS	Cd24a,CP,DCN,EHD1,ENO3,EPHB6,ERCC1,FOXC2,IL1R1,JUN,S100A4,SLC6A2,SOD3,TGFA,TLR2	15 (11)	10	CD44,GRB7,RAPGEF2,RASGRP3,RBBP4,SHC4	PITX1		Ap1,PIK3CG,RAF1
CDKN2D	transcription regulator		3			-0.853	7.13e-08	0.0246	ATF2,CCND1,CDK4,CDKN2A,CDKN2D,CEBPB,Creb,DUSP1,E2F3,ERK,FOSL1,H2AX,MTOR,NFkB (complex),NOS2,RELA,STAT3,STIM1,TNFRSF1A,YY1	ANGPT1,BAIAP2L1,Ccl7,Cd24a,CDON,CP,EGLN1,EHD1,ERCC1,ID3,IL23A,JUN,Klra2,LBP,LGMN,MSR1,PCOLCE,PDGFRA,PDGFRB,PRDX1,TGFA,TLR2	22 (20)	18	AHR	ATM
TNRC6A	other		3			0	7.15e-08	0.0333	CCND1,CEBPB,Creb,GATA3,GLI1,H2AX,IKBKB,JUN,MAPK1,MAPK9,NFkB (complex),NOTCH1,NR3C1,P38 MAPK,PPARGC1A,PRKAA1,STAT3,TNRC6A,TP53,YAP1	ANGPT1,Cd24a,CDON,COL6A1,CP,CTSC,EHD1,ENO3,EPHB6,ERCC1,IBSP,ID3,IER5L,IL23A,JUN,Klra2,LGMN,LYZ,NDC80,PCOLCE,PDGFA,PDGFRA,PDGFRB,PDGFRL,PPP3CA,S100A4,SLC6A2,SOD3,TGFA,TGFBR3,TLR2,ZFPM1	32 (20)	19
NTRK3	kinase		3			-0.378	7.25e-08	0.0193	Akt,CCND1,CEBPB,Creb,CTNNB1,DUSP1,DYRK1B,ERK,FOSL1,FOXO1,FOXO3,NFAT5,NFkB (complex),NOS3,NTRK3,PDGFRB,PPARGC1A,RAC1,RELA,SMAD1,SP1,STAT1,STAT3,STIM1,TNFRSF1A,TP53,TSC2,YY1	ANGPT1,Ccl7,Cd24a,CDON,DCN,EHD1,ENO3,FOXC2,ID3,IL1R1,IL23A,JUN,Klra2,LBP,LGMN,MSR1,NDC80,PCOLCE,PDGFA,PDGFRB,PDGFRL,PPP3CA,PRDX1,RGS5,SOD3,TCF3,TGFA,TLR2	28 (28)	27		TSC2
FLT3LG	cytokine		3			-0.557	7.52e-08	0.0388	Akt,CCND1,CEBPB,CHUK,Creb,CTNNB1,DUSP1,ERK,estrogen receptor,FLT3LG,FOSL1,FOXO1,FOXO3,Mapk,NFAT5,NFkB (complex),NOS3,PDGFRB,PPARGC1A,RELA,SP1,STAT3,STAT5A,STAT5B,STIM1,TNFRSF1A,TP53,TP63,YY1	ANGPT1,Ccl7,Cd24a,CDON,COL6A1,EHD1,ENO3,FOXC2,ID3,IL1R1,IL23A,JUN,Klra2,LBP,LGMN,MOXD1,MSR1,NDC80,PCOLCE,PDGFRL,PPP3CA,PRDX1,RGS5,SLC6A2,SOD3,TCF3,TGFA,TGFBR3,TLR2	29 (29)	27	ID2			RAG1
HRAS	enzyme		2			-1.069	7.82e-08	0.018	CHUK,ERK,HRAS,IKBKB,MAPK1,Mek	Ccl7,CP,DCN,EGLN1,EHD1,ENO3,ERCC1,FOXC2,IL23A,PDGFRA,PDGFRB,S100A4,SOD3,TGFA	14 (6)	5	NIBAN2,SPHK1	TRAF7
PRR14	other		3			-0.784	8.03e-08	0.0305	Akt,AKT1,CCND1,CEBPB,Creb,CTNNB1,DUSP1,ERK,FOSL1,FOXO1,FOXO3,IKBKB,MTOR,NFAT5,NFkB (complex),NOS2,NOS3,PDGFRB,PDPK1,PPARGC1A,PRKCD,PRR14,RELA,SP1,STAT1,STAT3,STIM1,TNFRSF1A,TSC2	ANGPT1,Ccl7,Cd24a,CDON,CP,EHD1,ERCC1,FOXC2,IL1R1,IL23A,JUN,Klra2,LBP,LGMN,MSR1,PCOLCE,PDGFA,PDGFRB,PDGFRL,PPP3CA,PRDX1,RGS5,SOD3,TCF3,TGFA,TLR2	26 (29)	28
TRAF3IP2	enzyme		3			1.177	8.09e-08	0.0195	Akt,Creb,CTNNB1,estrogen receptor,FAS,FOXO1,FOXO3,GATA1,GLI1,IKBKB,Jnk,JUN,MAPK7,MPO,NFE2L2,NFkB (complex),PDGFRB,Pka,PPARGC1A,PRKAA2,RELA,TNFRSF1A,TRAF3IP2,YAP1	ANGPT1,Ccl7,Cd24a,COL6A1,CP,CTSC,DCN,EGLN1,EHD1,EPHB6,FOXC2,IBSP,IER5L,IL1R1,JUN,LBP,PCOLCE,PDGFRL,PRDX1,RGS5,S100A4,SOD3,TCF3,TGFBR3,TLR2,ZFPM1	26 (24)	23				CCR2
mir-29	microRNA		3			0	8.42e-08	0.0482	Akt,EIF2AK2,ERK,FOS,GSK3B,JUN,MAPK14,MAPKAPK2,mir-29,NFkB (complex),NFKBIA,PMP22,RELA,STAT3,TP53	Ccl7,Cd24a,CDON,CP,EGLN1,ENO3,ERCC1,IBSP,ID3,IL1R1,IL23A,JUN,LYZ,MSR1,NDC80,PDGFA,PDGFRA,PDGFRB,PPP3CA,S100A4,TGFA,TLR2	22 (15)	15				CARD9	PMP22,TCL1A
USP49	peptidase		3			-0.408	9.24e-08	0.0183	AR,CEBPB,CHUK,EGR1,ESR1,GSK3B,Histone h3,JUN,MAPK1,MTOR,MYC,PSEN1,SMAD1/5,USP49	ANGPT1,Ccl7,Cd24a,Clec2d (includes others),CP,CTSC,DCN,EHD1,ENO3,ERCC1,FOXC2,IBSP,ID3,IL1R1,JUN,LBP,LGMN,LYZ,PDGFA,PDGFRA,PLVAP,SOD3,TCF3,WLS	24 (14)	13
CD55	other		3			-0.426	9.26e-08	0.044	C3,C3AR1,CD55,Complement,ERK,H2AX,JUN,NFkB (complex),PARP1,RELA,SIRT1,STAT3,TP53	ANGPT1,Ccl7,Cd24a,CDON,CP,DCN,EGLN1,ENO3,ERCC1,IBSP,ID3,JUN,LYZ,NDC80,PDGFA,PDGFRA,PDGFRB,PPP3CA,S100A4,SOD3,TGFA,TLR2	22 (13)	11		OGA
PRKD3	kinase		3			-1.177	9.41e-08	0.0322	Akt,AKT1,CCND1,CEBPB,Creb,CTNNB1,ERK,FOSL1,FOXO1,FOXO3,MTOR,MTORC1,NFkB (complex),NOS2,NOS3,PDGFRB,PPARGC1A,PRKD3,RPS6KB1,SPHK2,STAT1,STAT3,STIM1,TNFRSF1A,TSC2,YY1	ANGPT1,Ccl7,Cd24a,CDON,CP,DCN,EHD1,ERCC1,FOXC2,ID3,IL1R1,IL23A,JUN,Klra2,LBP,LGMN,MSR1,PCOLCE,PDGFRB,PDGFRL,PPP3CA,PRDX1,RGS5,SOD3,TCF3,TGFA	26 (26)	22	NFATC3
ITGB8	other		2			-0.775	9.76e-08	0.034	AHR,ITGB8,MAPK14,PTK2,SMAD1/5,SMAD3,TGFB1	Ccl7,COL6A1,DCN,EHD1,ID3,IL1R1,IL23A,LBP,PDGFA,PDGFRA,PDGFRB,S100A4,SOD3,TGFA,TGFBR3	15 (7)	6	ATF2			AHR,ITGB5
PRKN	enzyme		2			0	1.03e-07	0.019	Akt,EGFR,ERK1/2,IKBKG,MAPT,NFkB (complex),PDGFRB,PRKN,RELA	Ccl7,Cd24a,CP,DCN,EGLN1,FOXC2,IL1R1,IL23A,JUN,PRDX1,RGS5,SOD3,TGFA,TLR2	14 (9)	9				Cyclin E
LPAR4	transmembrane receptor		3			1.225	1.1e-07	0.0279	Akt,Creb,CTNNB1,ERK,EZH2,JUN,LPAR4,MTOR,MYC,NFAT5,NFkB (complex),NOS3,P38 MAPK,PDGFRB,PPARGC1A,Rac,Ras homolog,RELA,SP1,STAT1,STAT3,TSC2,YAP1	Cd24a,CDON,CP,CTSC,DCN,EHD1,ERCC1,FOXC2,IBSP,IL1R1,MSR1,PCOLCE,PDGFRA,PDGFRB,PDGFRL,PPP3CA,RGS5,S100A4,SLC6A2,SOD3,TCF3,TGFA,TLR2,WLS	24 (23)	21
PTCH1	transmembrane receptor		2			-0.277	1.5e-07	0.0028	GLI1,PTCH1,RELA,SHH,SMO	ANGPT1,EGLN1,EPHB6,FOXC2,ID3,IER5L,IL23A,PDGFA,PDGFRA,S100A4,TGFA,TGFBR3,TLR2	13 (5)	4					MYOD1,SMO
MAP2K3	kinase		3			0.707	1.72e-07	0.0379	Ap1,CCND1,CEBPB,CTNNB1,DYRK1B,EGR1,estrogen receptor,FOS,GATA3,GLI1,JUN,MAP2K3,MAPK13,MAPK14,Mek,NFkB (complex),NOTCH1,NR3C1,P38 MAPK,PDGFRB,PPARGC1A,PRKD1,TGFB1,TP53,YAP1	Ccl7,Cd24a,COL6A1,CP,CTSC,EHD1,ENO3,EPHB6,ERCC1,FOXC2,IBSP,ID3,IER5L,IL23A,Klra2,LGMN,LYZ,NDC80,PDGFA,PDGFRA,PDGFRB,PDGFRL,PPP3CA,RGS5,S100A4,SLC6A2,SOD3,TCF3,TGFA,TGFBR3,TLR2,ZFPM1	32 (25)	23				Ap1,DYRK1B,EGR1
ERBIN	other		3			-0.626	1.76e-07	0.018	Akt,ATF2,CCND1,CEBPB,Creb,CTNNB1,ERBIN,ERK,FOSL1,FOXO1,FOXO3,NOS3,PDGFRB,PPARGC1A,STAT1,STIM1,TNFRSF1A,TSC2,YY1	ANGPT1,Ccl7,DCN,EHD1,FOXC2,ID3,IL1R1,IL23A,JUN,Klra2,LBP,LGMN,MSR1,PCOLCE,PDGFRA,PDGFRB,PDGFRL,PPP3CA,PRDX1,RGS5,SOD3,TCF3,TGFA	23 (19)	18
ATG16L1	enzyme		3			-0.192	1.85e-07	0.0197	Akt,ATF2,ATG16L1,CCND1,CEBPB,Creb,CTNNB1,ERK,estrogen receptor,FOSL1,FOXO1,FOXO3,IKBKB,Mapk,NFkB (complex),PDGFRB,PPARGC1A,STAT1,STIM1,TNFRSF1A,TP53,TSC2	ANGPT1,Ccl7,Cd24a,COL6A1,DCN,EHD1,ENO3,FOXC2,IL1R1,IL23A,JUN,Klra2,LBP,LGMN,MSR1,NDC80,PCOLCE,PDGFRA,PDGFRB,PDGFRL,PPP3CA,PRDX1,RGS5,SLC6A2,TCF3,TGFA,TGFBR3	27 (22)	21	STUB1
PMP22	other		3			0.626	1.85e-07	0.0187	Akt,ATF2,CCND1,CEBPB,Creb,CTNNB1,ERK,FOSL1,FOXO1,FOXO3,NOS3,PDGFRB,PMP22,PPARGC1A,STAT1,STIM1,TNFRSF1A,TSC2,YY1	ANGPT1,Ccl7,DCN,EHD1,FOXC2,ID3,IL1R1,IL23A,JUN,Klra2,LBP,LGMN,MSR1,PCOLCE,PDGFRA,PDGFRB,PDGFRL,PPP3CA,PRDX1,RGS5,SOD3,TCF3,TGFA	23 (19)	19	IL10RA	AHR,mir-29,RXRA		NOTCH1
STS	enzyme		3			-0.626	1.89e-07	0.0204	Akt,ATF2,CCND1,CEBPB,Creb,CTNNB1,ERK,FOSL1,FOXO1,FOXO3,NOS3,PDGFRB,PPARGC1A,STAT1,STIM1,STS,TNFRSF1A,TSC2,YY1	ANGPT1,Ccl7,DCN,EHD1,FOXC2,ID3,IL1R1,IL23A,JUN,Klra2,LBP,LGMN,MSR1,PCOLCE,PDGFRA,PDGFRB,PDGFRL,PPP3CA,PRDX1,RGS5,SOD3,TCF3,TGFA	23 (19)	18
PP1 protein complex group	complex		3			0.218	1.95e-07	0.0434	Ap1,ATF2,CEBPB,CHUK,EGR1,GSK3B,HIF1A,JUN,MAP2K1,MTOR,MYC,P38 MAPK,PP1 protein complex group,PSEN1,RELA,STAT3,TIAM1	ANGPT1,Ccl7,CDON,CP,CTSC,DCN,EGLN1,ERCC1,FOXC2,IBSP,JUN,LGMN,LYZ,PDGFRA,PLVAP,S100A4,SLC6A2,SOD3,TCF3,TGFA,WLS	21 (17)	16	Pka	EGR1			TIAM1
RPS6KA3	kinase		3			0.174	2.14e-07	0.0243	AKT1,CCND1,CEBPB,CHEK1,CHUK,CLOCK,CTNNB1,E2F3,EIF2AK2,estrogen receptor,FGFR1,GATA3,GLI1,H2AX,Histone h3,Jnk,MAPK1,MAPK3,NFE2L2,NFkB (complex),NFKBIA,NOTCH1,P38 MAPK,Pka,PPARGC1A,RPS6KA3,STAT3,TNFRSF1A,TP53	ANGPT1,BAIAP2L1,Ccl7,Cd24a,CDON,CP,CTSC,EHD1,EPHB6,FOXC2,ID3,IER5L,JUN,Klra2,LBP,LGMN,LYZ,MOXD1,NDC80,PDGFA,PDGFRA,PDGFRB,PDGFRL,PPP3CA,PRDX1,RGS5,S100A4,SLC6A2,TCF3,TGFA,TGFBR3,TLR2,ZFPM1	33 (29)	25		GLI1,OGA
DDIT4	other		3			-1.3	2.2e-07	0.0268	CASP8,CCND1,CEBPB,CHUK,DDIT4,ESR1,estrogen receptor,GLI1,GSK3B,IKBKB,JUN,MTOR,NFkB (complex),P38 MAPK,PSEN1,TP53	Ccl7,Cd24a,Clec2d (includes others),COL6A1,CP,CTSC,DCN,ENO3,EPHB6,ERCC1,FOXC2,IBSP,ID3,IER5L,IL1R1,IL23A,Klra2,LBP,LGMN,LYZ,NDC80,PDGFA,PDGFRA,PDGFRB,PLVAP,PPP3CA,S100A4,SLC6A2,TGFA	29 (16)	14	BRCA1,NFATC3	COL18A1,IL10RA,TFRC
LASP1	transporter		3			-0.784	2.43e-07	0.0376	Akt,CCND1,CEBPB,CTNNB1,DUSP1,ERK,FOSL1,FOXO1,FOXO3,H2AX,LASP1,Mapk,Mek,MTOR,NFAT5,NFkB (complex),NOS2,NOS3,PPARGC1A,RELA,SMAD2,SP1,STAT3,STIM1,TNFRSF1A,TSC2	ANGPT1,Ccl7,Cd24a,CDON,CP,DCN,EHD1,ERCC1,FOXC2,IL1R1,IL23A,Klra2,LBP,LGMN,MSR1,PDGFRA,PDGFRB,PDGFRL,PPP3CA,PRDX1,S100A4,SLC6A2,SOD3,TCF3,TGFA,TLR2	26 (26)	25	CIP2A
LRAT	enzyme		3			1.279	2.54e-07	0.0434	Akt,AKT1,CTNNB1,EZH2,HOXA10,INSR,JAK2,JUN,LRAT,MTOR,NFkB (complex),NOS3,P38 MAPK,PDGFRB,PPARGC1A,STAT5B,TIMP3,TSC2	Ccl7,Cd24a,CP,CTSC,DCN,ERCC1,FOXC2,IBSP,IL1R1,LYZ,MOXD1,PDGFRA,PDGFRL,PPP3CA,RGS5,S100A4,SLC6A2,SOD3,TCF3,TGFA,TGFBR3,TLR2	22 (18)	17
SCD5	enzyme		3			0.962	2.71e-07	0.0379	Akt,CCND1,CEBPB,Creb,CTNNB1,EGFR,ERK,FAS,FOXO1,FOXO3,Mapk,MAPK1,MTOR,NFkB (complex),NOS2,NOS3,P38 MAPK,PDGFRB,PPARGC1A,SCD5,STAT3,STAT6,STIM1,TNFRSF1A,TSC2,YY1	ANGPT1,Ccl7,Cd24a,CDON,COL6A1,CP,DCN,ENO3,ERCC1,FOXC2,ID3,IL1R1,IL23A,JUN,Klra2,LBP,LGMN,MSR1,PCOLCE,PDGFRL,PPP3CA,PRDX1,RGS5,SLC6A2,SOD3,TCF3,TGFA	27 (26)	25	GLI1
SGK1	kinase		2			0.277	2.84e-07	0.0335	CHUK,FOXO1,Integrin,NFKBIA,NR3C1,RELA,SGK1	ANGPT1,Ccl7,COL6A1,CP,DCN,EGLN1,FOXC2,IL1R1,IL23A,JUN,PDGFA,SOD3,TLR2	13 (7)	6	AGTR1,NORAD	Alpha catenin		SMO
Alpha catenin	group		2			0.577	3.11e-07	0.0217	Alpha catenin,CTNNB1,RELA	Ccl7,COL6A1,EGLN1,FOXC2,IL23A,JUN,LYZ,PDGFRA,PPP3CA,TCF3,TGFA,TLR2	12 (3)	3					PTX3,SGK1
PIK3R2	kinase		3			0.192	3.22e-07	0.0293	Akt,CCND1,CEBPB,Creb,CTNNB1,DUSP1,EIF4E,ERK,FOSL1,IRS2,MKNK1,NFAT5,NFKB1,NFKBIA,NOS3,P38 MAPK,PDGFRB,PIK3R2,PPARGC1A,RELA,RPS6KB1,SP1,STAT3,STIM1,TNFRSF1A,TP53,YY1	Ccl7,CDON,CP,DCN,EHD1,ENO3,FOXC2,ID3,IL1R1,IL23A,JUN,Klra2,LBP,LGMN,LYZ,MSR1,NDC80,PCOLCE,PDGFRL,PPP3CA,PRDX1,RGS5,SLC6A2,SOD3,TCF3,TGFA,TLR2	27 (27)	24
RGS4	enzyme		3			1	3.81e-07	0.0406	Akt,Calcineurin protein(s),CCND1,CEBPB,CTNNB1,ERK,FOSL1,FOXO1,FOXO3,MTOR,NFkB (complex),NOS2,NOS3,P38 MAPK,PDGFRB,PPARGC1A,RGS4,STAT1,STAT3,STIM1,TNFRSF1A,TSC2	ANGPT1,Ccl7,Cd24a,CDON,CP,DCN,EHD1,ERCC1,FOXC2,IL1R1,IL23A,JUN,Klra2,LBP,LGMN,MSR1,PDGFRB,PDGFRL,PPP3CA,PRDX1,RGS5,SLC6A2,SOD3,TCF3,TGFA	25 (22)	20				TFRC
ATR	kinase		2			0.229	4.01e-07	0.0477	Akt,ATF2,ATR,GSK3B,H2AX,JUN,NFkB (complex),P38 MAPK,TP53	ANGPT1,Ccl7,Cd24a,CP,ENO3,ERCC1,IBSP,ID3,IL1R1,LYZ,NDC80,PDGFA,PDGFRA,PDGFRB,PPP3CA,S100A4,SLC6A2,TGFA,TLR2	19 (9)	8	BRCA1			ATF2
TRAF7	enzyme		2			-0.577	4.23e-07	0.0356	CHUK,IKBKB,IKBKG,MAP2K1/2,NFkB (complex),NFKBIA,P38 MAPK,TRAF7	Ccl7,Cd24a,CP,DCN,EGLN1,FOXC2,JUN,PDGFA,S100A4,SLC6A2,SOD3,TLR2	12 (8)	8					HRAS
Dynamin	group		3			-0.392	5.38e-07	0.0246	AKT1,CCND1,CEBPB,CHUK,CLOCK,Creb,CTNNB1,Dynamin,ERK,FOSL1,FOXO1,FOXO3,FOXO4,HMOX1,MAPK1,NFKBIA,NOS3,PRKCI,RELA,STAT3,STIM1,TNFRSF1A,TP53,TSC2,YY1	ANGPT1,Ccl7,CDON,DCN,EGLN1,EHD1,ENO3,FOXC2,ID3,IL23A,JUN,Klra2,LBP,LGMN,MOXD1,MSR1,NDC80,PCOLCE,PDGFRA,PDGFRB,PPP3CA,PRDX1,RGS5,SOD3,TCF3,TGFA	26 (25)	23
CUL7	enzyme		3			-0.333	6.75e-07	0.0099	CUL7,IKBKB,MST1,NFKBIA,NOTCH3,YAP1,Yap1	Ccl7,CP,DCN,EGLN1,EHD1,MSR1,PDGFRB,S100A4,SOD3	9 (7)	4
IL-2R	complex		3			0	1.01e-06	0.0496	AKT1,Creb,EIF4E,EZH2,GAB2,GSK3B,IL-2R,JAK1,JAK3,MAPK1,MAPK14,MKNK1,RELA,STAT1,STAT3,STAT5a/b	ANGPT1,Ccl7,CDON,CP,EGLN1,EHD1,ENO3,ERCC1,IBSP,LYZ,PCOLCE,PDGFRA,PDGFRB,S100A4,TGFA,TLR2	16 (16)	12
GLI1	transcription regulator		3			-0.535	1.21e-06	0.0329	ATM,CHEK1,E2F3,ERK1/2,GLI1,H2AX,PTK2,RELA,SRC	ANGPT1,BAIAP2L1,EGLN1,EPHB6,ID3,IER5L,IL23A,JUN,PDGFA,PDGFRA,PDGFRB,S100A4,TGFBR3,TLR2	14 (9)	8	Pki,SMO			CD44,NREP,RXRA,SCD5	HOXC6,RPS6KA3
Notch	group		3			-1.8	1.3e-06	0.0384	AKT1,CEBPB,CHUK,CLOCK,Creb,CTNNB1,FOXO1,FOXO3,FOXO4,HMOX1,JUN,MAPK1,MAPK14,NFkB (complex),Notch,P38 MAPK,STAT3,TGFB1,TP53	ANGPT1,Ccl7,Cd24a,CDON,CTSC,DCN,EHD1,ENO3,FOXC2,IBSP,ID3,JUN,LGMN,LYZ,MOXD1,NDC80,PCOLCE,PDGFRA,PDGFRB,PPP3CA,RGS5,S100A4,SLC6A2,TCF3,TGFBR3	25 (19)	18	PSEN1,PSEN2			NOTCH3
FHL2	transcription regulator		2			0.905	1.44e-06	0.0247	AKT1,estrogen receptor,FHL2,MAPK1,RAC1	COL6A1,EHD1,ENO3,ERCC1,IL23A,JUN,PDGFA,PDGFRA,PDGFRB,TGFA,TGFBR3	11 (5)	5
MMP1	peptidase		1			1	1.77e-06	0.0002	MMP1	ANGPT1,JUN,PDGFA,S100A4	4 (1)	1	Ap1,PTH,RAF1	COL18A1,NOTCH1		EGR1
ITGB5	other		2			-1	2.03e-06	0.015	AHR,ITGB5,MERTK,PTK2	COL6A1,DCN,EGLN1,EHD1,IL1R1,IL23A,LBP,PDGFRA,PDGFRB	9 (4)	3	ITGB8	ID2,OGA,TNFRSF1A,TNFRSF1B		AHR
BMPR2	kinase		2			0.707	4.86e-06	0.0345	Akt,BMPR2,NOS3,P38 MAPK,SMAD1,SMAD1/5	ID3,IL1R1,IL23A,JUN,PDGFA,SLC6A2,SOD3,TLR2	8 (6)	5				ID2	PTX3
AHR	ligand-dependent nuclear receptor		1			-1.414	4.98e-06	0.0126	AHR	COL6A1,DCN,EGLN1,EHD1,IL1R1,LBP,PDGFRA,PDGFRB	8 (1)	1	ITGB5,ITGB8,PAX7,PRKDC	STUB1		CDKN2D,CSF2RB,Cyclin E,IL22,NOTCH1,NOTCH3,Pka,PTX3	CD14,PDGFB,PMP22
BMP1	peptidase		2			0.577	7.56e-06	0.0013	BMP1,LOX	DCN,PDGFRA,PDGFRB	3 (2)	2				LOX
PRKDC	kinase		2			-0.707	8.16e-06	0.0429	Akt,AKT1,ATM,H2AX,NFKBIA,PRKDC,SNAI1	ANGPT1,Ccl7,ERCC1,IBSP,IL1R1,JUN,PDGFRA,PDGFRB	8 (7)	6				AHR
TRPV4	ion channel		2			0	8.71e-06	0.0117	ERK,Ras homolog,TRPV4	Ccl7,IL23A,JUN,PDGFRA,TGFA,TLR2	6 (3)	3
C1QTNF9	other		2			-0.378	1.07e-05	0.0181	C1QTNF9,ERK,PRKAA2	Ccl7,IL1R1,IL23A,JUN,PCOLCE,PDGFRA,TGFA	7 (3)	2
NOTCH3	transcription regulator		2			-0.378	1.25e-05	0.0322	Akt,ERK,NOTCH3	Ccl7,IL1R1,IL23A,JUN,MSR1,PDGFRB,TGFA	7 (3)	3	AHR,Notch	ALOX15,MFNG		PTX3	NOTCH1
NSD2	enzyme		3			-0.333	1.39e-05	0.0436	EZH2,NFKB1,NSD2,ZBTB16	Ccl7,Cd24a,IBSP,ID3,IL23A,JUN,PDGFA,S100A4,TLR2	9 (4)	4
NREP	other		1			1.732	1.47e-05	0.0008	NREP	PDGFA,PDGFRA,PDGFRB	3 (1)	1	GLI1			PDGFB
CCR2	G-protein coupled receptor		1			1.342	1.57e-05	0.006	CCR2	Ccl7,COL6A1,DCN,IL23A,PCOLCE	5 (1)	1	ADRB2,CD44,ID2,TRAF3IP2	PTX3		IL22
FCAR	transmembrane receptor		2			1.414	2.86e-05	0.0401	ERK,FCAR,Mapk,MAPK1	Ccl7,EHD1,ENO3,ERCC1,IL23A,JUN,SLC6A2,TGFA	8 (4)	3
TNFRSF1A	transmembrane receptor		1			-0.447	3.15e-05	0.0128	TNFRSF1A	IL23A,JUN,LBP,PDGFA,TGFA	5 (1)	1	ID2	COL18A1		CD44,CXCL1,IL22,MYOD1,NFKB1	ITGB5,TFRC
STAT	group		2			-1.633	4.23e-05	0.0349	AKT1,ERK,STAT	Ccl7,IL23A,JUN,PDGFRA,PDGFRB,TGFA	6 (3)	2
PRKG2	kinase		2			-0.816	4.46e-05	0.0263	ERK,PRKG2,SOX9	Ccl7,IL23A,JUN,PDGFRA,S100A4,TGFA	6 (3)	3		OGA
IGHM	transmembrane receptor		2			0	4.95e-05	0.0379	ERK,IGHM,MEF2C,MEF2D	Ccl7,IBSP,IL23A,JUN,SOD3,TGFA	6 (4)	4	NFKB1,RAG1
PFN1	other		2			-0.816	5.08e-05	0.0435	ATF2,NOS3,P38 MAPK,PFN1	IL23A,JUN,PDGFRA,SLC6A2,SOD3,TLR2	6 (4)	3				ATF2
MARCHF5	enzyme		1			1.414	5.46e-05	0.0002	MARCHF5	COL6A1,PDGFRB	2 (1)	1
Pak	group		2			0	5.63e-05	0.0487	ERK,H2AX,MAP2K1,Pak,RAF1	ANGPT1,Ccl7,IL23A,JUN,PDGFRA,TGFA	6 (5)	4				RAF1
Ap1	complex		1			-0.577	6.68e-05	0.0024	Ap1	IL23A,JUN,S100A4	3 (1)	1	AGTR1,CXCL1,HMGA1,MAP2K3,RAS,SPHK1	RXRA		MMP1
PTX3	other		1			-0.577	6.68e-05	0.0031	PTX3	Ccl7,JUN,TLR2	3 (1)	1	AHR,NOTCH3	ACVR1,Alpha catenin,BMPR2			CCR2,NFKB1
ADGRE5	G-protein coupled receptor		2			-0.447	7.83e-05	0.0316	ADGRE5,ERK,Ras homolog	Ccl7,IL23A,JUN,PDGFRA,TGFA	5 (3)	2
TNFRSF1B	transmembrane receptor		1			0	8.56e-05	0.0079	TNFRSF1B	JUN,LBP,PDGFA,TGFA	4 (1)	1				MYOD1	ITGB5
TSC2	other		1			0.447	8.91e-05	0.0125	TSC2	CP,EGLN1,IL1R1,PDGFRA,PDGFRB	5 (1)	1					NTRK3
CBFB	transcription regulator		1			-1	9.01e-05	0.0078	CBFB	FOXC2,KCNK5,LGMN,TGFBR3	4 (1)	1				IL22
ATF2	transcription regulator		1			-0.577	9.33e-05	0.0055	ATF2	IL23A,JUN,PDGFRA	3 (1)	1	ATR,PFN1			ITGB8
CARD9	other		1			0.577	9.33e-05	0.0019	CARD9	CLEC6A,IL23A,TLR2	3 (1)	1	mir-29			IL22
ARHGAP31	other		1			-0.577	0.000138	0.0095	ARHGAP31	COL6A1,JUN,TGFBR3	3 (1)	1					ID2
NSD2	enzyme		2			-0.447	0.000176	0.0283	EZH2,NSD2	IBSP,IL23A,JUN,PDGFA,S100A4	5 (2)	2
CRNDE	other		1			1.732	0.00018	0.0034	CRNDE	IL1R1,PDGFA,PDGFRB	3 (1)	1				TIAM1
Pki	group		2			0	0.000185	0.0384	GLI1,Pki,YAP1	EHD1,EPHB6,ID3,IER5L,PDGFA,PDGFRA,S100A4,TGFBR3	8 (3)	2				GLI1
OGA	enzyme		1			1.134	0.000188	0.039	OGA	Cd24a,EFNB1,EPHB6,IL23A,JUN,PLD4,TGFA	7 (1)	1				CD14,CSF2RB,SIGIRR	CD44,CD55,FABP3,FDPS,ITGB5,PRKG2,RPS6KA3
CD5L	transmembrane receptor		1			0	0.00019	0.0009	CD5L	Ccl7,TLR2	2 (1)	1
ACVR1	kinase		2			-1.732	0.000211	0.0124	ACVR1,SMAD1,SMAD1/5	IBSP,ID3,PDGFA	3 (3)	3		SOX1,SOX3			PTX3
PDGF-AA	complex		2			0.447	0.000217	0.0387	Mapk,Mek,PDGF-AA	JUN,PDGFA,PDGFRA,PDGFRB,SLC6A2	5 (3)	3
EGR1	transcription regulator		1			1	0.000257	0.0351	EGR1	Ccl7,JUN,LYZ,PDGFA	4 (1)	1	F2R,MAP2K3,MMP1,NFKB1,Pka,TICAM1	BRCA1		CD44,PDGFC	PP1 protein complex group
NORAD	other		1			-0.577	0.000265	0.0154	NORAD	ID3,JUN,PDGFA	3 (1)	1				SGK1
Cyclin E	group		2			1.134	0.000266	0.0431	Cyclin E,SMARCA4,SMARCC1,SNAI2	CP,ENO3,IBSP,IL23A,SOD3,TCF3,TLR2	7 (4)	3	AHR,BRCA1,PRKN	DYRK1B
IL10RA	transmembrane receptor		1			0.816	0.000289	0.0299	IL10RA	Cd24a,DCN,IL23A,PCOLCE,PDGFRA,TLR2	6 (1)	1	ID2			DKK1,PMP22	DDIT4
DDX17	enzyme		1			0	0.000405	0.006	DDX17	JUN,S100A4	2 (1)	1
GLI1	transcription regulator		1			0.378	0.000428	0.0356	GLI1	EPHB6,ID3,IER5L,PDGFA,PDGFRA,S100A4,TGFBR3	7 (1)	1	Pki,SMO			CD44,NREP,RXRA,SCD5	HOXC6,RPS6KA3
DYRK1B	kinase		1			1.414	0.000494	0.0057	DYRK1B	CP,SOD3	2 (1)	1	MAP2K3				Cyclin E
EIF4G2	translation regulator		1			-1.414	0.000494	0.0085	EIF4G2	EGLN1,JUN	2 (1)	1
LOX	enzyme		1			1.414	0.000494	0.0089	LOX	PDGFRA,PDGFRB	2 (1)	1	BMP1,NFIB
NFIC	transcription regulator		1			-1.414	0.000494	0.0086	NFIC	PDGFA,PDGFRA	2 (1)	1
DNAJB6	transcription regulator		2			1	0.000496	0.0473	AKT1,DNAJB6,NFATC3	ANGPT1,JUN,PDGFRA,PDGFRB	4 (3)	2				DKK1	NFATC3
miR-146a-5p (and other miRNAs w/seed GAGAACU)	mature microRNA		1			-1.732	0.000507	0.0106	miR-146a-5p (and other miRNAs w/seed GAGAACU)	IL1R1,LBP,PDGFRA	3 (1)	1
MAPKAPK2	kinase		1			1.732	0.000537	0.0171	MAPKAPK2	Ccl7,IL23A,MSR1	3 (1)	1	CD44,TICAM1
PSEN1	peptidase		1			0	0.000561	0.0209	PSEN1	CTSC,PDGFRA,PDGFRB,PLVAP	4 (1)	1				F2R,Notch,NOTCH1
PCSK9	peptidase		1			1.414	0.000592	0.0069	PCSK9	Ccl7,TLR2	2 (1)	1
CUL4A	other		3			1.342	0.000606	0.047	ATM,CUL4A,H2AX,LIG1,TET2	ANGPT1,IL1R1,JUN,PDGFRB,TGFA	5 (5)	3
TCL1A	transcription regulator		1			1.414	0.000698	0.0079	TCL1A	CD300LD,CLEC6A	2 (1)	1		mir-29
PTH	other		1			0.577	0.000899	0.0452	PTH	ANGPT1,JUN,PDGFA	3 (1)	1	ADRB2			MMP1,Pka
CIP2A	other		1			-1.732	0.000942	0.0122	CIP2A	DCN,ENO3,PDGFRB	3 (1)	1				HMGA1,LASP1
SMAD5	transcription regulator		1			-1.414	0.00107	0.0219	SMAD5	ID3,PDGFA	2 (1)	1					PDGFB
COL18A1	other		1			1.732	0.00123	0.0394	COL18A1	EGLN1,ID3,JUN	3 (1)	1	BRCA1				DDIT4,F2R,MMP1,TNFRSF1A
SOX1	transcription regulator		1			-1.732	0.00133	0.0427	SOX1	ANGPT1,PDGFRA,WLS	3 (1)	1					ACVR1
SOCS6	other		1			0	0.00136	0.0139	SOCS6	Ccl7,IL23A	2 (1)	1
SOX3	transcription regulator		1			-1.732	0.00156	0.0476	SOX3	ANGPT1,PDGFRA,WLS	3 (1)	1					ACVR1
SMO	G-protein coupled receptor		1			0	0.00168	0.0187	SMO	FOXC2,TGFA	2 (1)	1	SGK1	PTCH1		FOXF2,GLI1,NFKB1
MYF6	transcription regulator		2			1.732	0.00168	0.042	MYF6,MYOD1	DCN,ENO3,PDGFA	3 (2)	2				MYOD1
TFRC	transporter		1			-0.577	0.00175	0.0447	TFRC	JUN,MS4A6A,PLD4	3 (1)	1	RGS4	TNFRSF1A			DDIT4
FOXF2	transcription regulator		1			-1.414	0.00185	0.0177	FOXF2	PDGFA,PDGFRA	2 (1)	1	SMO				PDGFB
PDGFC	growth factor		1			1.414	0.00185	0.029	PDGFC	PDGFRA,PDGFRB	2 (1)	1	EGR1
RAG1	enzyme		1			-1.414	0.00185	0.0321	RAG1	IBSP,IL23A	2 (1)	1	FLT3LG	GFI1B		IGHM
mir-135	microRNA		1			-1.414	0.00185	0.0278	mir-135	Ccl7,IL1R1	2 (1)	1
PSEN2	peptidase		1			0.577	0.00188	0.0358	PSEN2	CTSC,PDGFRA,PDGFRB	3 (1)	1				F2R,Notch,NOTCH1
PDGFB	growth factor		1			1.414	0.00203	0.0255	PDGFB	PDGFRB,RGS5	2 (1)	1	ADRB2,NOTCH1,NREP,PIK3CA	AHR,FOXF2,RXRA,SMAD5		HMGA1
PIK3CA	kinase		1			-1.414	0.00203	0.0283	PIK3CA	PDGFRA,PDGFRB	2 (1)	1	CD44			CD14,PDGFB	PIK3CG
PDGF-DD	complex		1			1.414	0.00222	0.0282	PDGF-DD	Ccl7,PDGFRA	2 (1)	1
NFATC3	transcription regulator		1			0	0.00242	0.0329	NFATC3	ANGPT1,JUN	2 (1)	1		DNAJB6		DDIT4,PRKD3
SIGIRR	transmembrane receptor		1			0	0.00242	0.025	SIGIRR	IL1R1,IL23A	2 (1)	1	OGA				NFKB1
TRPV4	ion channel		1			1.414	0.00242	0.0399	TRPV4	Ccl7,TLR2	2 (1)	1
AGTR1	G-protein coupled receptor		1			-1.414	0.00262	0.0396	AGTR1	CP,JUN	2 (1)	1	TICAM1			Ap1,PLCB1,SGK1
ATOX1	transporter		1			1	0.00305	0.0108	ATOX1	SOD3	1 (1)	1
EHD4	enzyme		1			1	0.00305	0.0037	EHD4	EHD1	1 (1)	1
HOOK3	other		1			-1	0.00305	0.0173	HOOK3	MSR1	1 (1)	1
PRR5	other		1			1	0.00305	0.0156	PRR5	PDGFRB	1 (1)	1
RNF7	enzyme		1			1	0.00305	0.0233	RNF7	JUN	1 (1)	1
SEC22B	other		1			-1	0.00305	0.0008	SEC22B	NBEAL2	1 (1)	1
VANGL1	other		1			-1	0.00305	0.0233	VANGL1	JUN	1 (1)	1
NOTCH3	transcription regulator		1			1.414	0.00305	0.0387	NOTCH3	MSR1,PDGFRB	2 (1)	1	AHR,Notch	ALOX15,MFNG		PTX3	NOTCH1
ALOX15	enzyme		1			-1.414	0.00328	0.0242	ALOX15	ID3,JUN	2 (1)	1					Muc1,NOTCH3
CD14	transmembrane receptor		1			1.414	0.00328	0.0278	CD14	MSR1,TLR2	2 (1)	1	OGA,PIK3CA	AHR
F2R	G-protein coupled receptor		1			1.414	0.00328	0.036	F2R	ANGPT1,S100A4	2 (1)	1	PSEN1,PSEN2	COL18A1		EGR1
RPSA	translation regulator		1			-1.414	0.00352	0.0436	RPSA	Ccl7,IL1R1	2 (1)	1
PARP14	enzyme		2			0	0.00427	0.0376	F3,PARP14	ANGPT1,ID3	2 (2)	2
FHL2	transcription regulator		1			0	0.00454	0.0361	FHL2	IL23A,PDGFRB	2 (1)	1
HOXC6	transcription regulator		1			1.414	0.00454	0.0136	HOXC6	DCN,PDGFRA	2 (1)	1		GLI1
ADAMTS9-AS2	other		1			1	0.00608	0.0279	ADAMTS9-AS2	TGFBR3	1 (1)	1
BMP1	peptidase		1			-1	0.00608	0.0346	BMP1	DCN	1 (1)	1				LOX
CCL18	cytokine		1			1	0.00608	0.0398	CCL18	S100A4	1 (1)	1
CD82	other		1			1	0.00608	0.017	CD82	DCN	1 (1)	1
CLCF1	cytokine		1			1	0.00608	0.0173	CLCF1	MSR1	1 (1)	1
EIF4E2	translation regulator		1			1	0.00608	0.0425	EIF4E2	PDGFRA	1 (1)	1
EPN3	other		1			1	0.00608	0.0048	EPN3	EHD1	1 (1)	1
Gpcr	group		1			-1	0.00608	0.0233	Gpcr	JUN	1 (1)	1				PIK3CG
IL17RC	transmembrane receptor		1			-1	0.00608	0.0102	IL17RC	PLET1	1 (1)	1
KLHL2	other		1			-1	0.00608	0.0233	KLHL2	JUN	1 (1)	1
NAGLU	enzyme		1			-1	0.00608	0.0256	NAGLU	LYZ	1 (1)	1
TIAM1	other		1			-1	0.00608	0.0422	TIAM1	JUN	1 (1)	1	CRNDE	PP1 protein complex group
mir-499	microRNA		1			-1	0.00608	0.0146	mir-499	PPP3CA	1 (1)	1
potassium channel	group		1			-1	0.00608	0.0233	potassium channel	JUN	1 (1)	1
LTBR	transmembrane receptor		1			0	0.0063	0.048	LTBR	LYZ,PDGFRB	2 (1)	1				NFKB1
MYOD1	transcription regulator		1			1.414	0.0063	0.0448	MYOD1	ENO3,PDGFA	2 (1)	1	MYF6,TNFRSF1A,TNFRSF1B	PTCH1
PAX7	transcription regulator		1			-1.414	0.00905	0.0435	PAX7	Cd24a,ID3	2 (1)	1				AHR,ID2
BCLAF3	other		1			1	0.00911	0.0443	BCLAF3	IL23A	1 (1)	1
BTG1	transcription regulator		1			-1	0.00911	0.0387	BTG1	JUN	1 (1)	1
CHRM1	G-protein coupled receptor		1			-1	0.00911	0.0429	CHRM1	JUN	1 (1)	1
CHTOP	other		1			-1	0.00911	0.0467	CHTOP	TGFA	1 (1)	1
GFI1B	transcription regulator		1			-1	0.00911	0.0261	GFI1B	TGFBR3	1 (1)	1					RAG1
GK	kinase		1			-1	0.00911	0.0404	GK	ENO3	1 (1)	1
HSD17B14	enzyme		1			1	0.00911	0.0466	HSD17B14	IL23A	1 (1)	1
PRR7	other		1			-1	0.00911	0.0443	PRR7	JUN	1 (1)	1
SIX3	transcription regulator		1			1	0.00911	0.0346	SIX3	PDGFRA	1 (1)	1
nicotinic acetylcholine receptor	complex		1			1	0.00911	0.0446	nicotinic acetylcholine receptor	JUN	1 (1)	1
CTSA	peptidase		1			-1	0.0121	0.0426	CTSA	SOD3	1 (1)	1
MEFV	other		1			1	0.0121	0.0472	MEFV	LYZ	1 (1)	1	TICAM1
PLCB1	enzyme		1			-1	0.0121	0.044	PLCB1	Cd24a	1 (1)	1	AGTR1
RAB11FIP3	other		1			-1	0.0121	0.0233	RAB11FIP3	JUN	1 (1)	1
RSPO2	other		1			-1	0.0121	0.0354	RSPO2	IBSP	1 (1)	1
SMN1/SMN2	other		1			1	0.0121	0.0454	SMN1/SMN2	Ccl7	1 (1)	1
TFCP2	transcription regulator		1			-1	0.0121	0.0241	TFCP2	TGFA	1 (1)	1
Muc1	transmembrane receptor		1			1	0.0151	0.0371	Muc1	PDGFA	1 (1)	1	IL22	ALOX15
NFIB	transcription regulator		1			-1	0.0151	0.0456	NFIB	EFNB1	1 (1)	1		HMGA1		LOX
Presenilin	group		1			-1	0.0151	0.0351	Presenilin	EGLN1	1 (1)	1
mir-191	microRNA		1			1	0.0151	0.039	mir-191	TCF3	1 (1)	1
Agtr1b	G-protein coupled receptor		1			1	0.0181	0.0483	Agtr1b	SLC6A2	1 (1)	1
EEF2K	kinase		1			-1	0.0181	0.0396	EEF2K	DCN	1 (1)	1
HIVEP3	transcription regulator		1			1	0.0181	0.0433	HIVEP3	S100A4	1 (1)	1
Muc4	other		1			1	0.0181	0.0416	Muc4	LYZ	1 (1)	1

## Sheet: UpstreamRegulators
Upstream Regulators for My Projects->Shanta_4sc2->Meta_70 - 2021-08-17 12:18 PM
Analysis	ID	Upstream Regulator	Expr Log Ratio	Molecule Type	Predicted Activation State	Activation z-score	Notes	Bias Term	Bias-corrected z-score	p-value of overlap	Target molecules in dataset	Mechanistic Network
Meta_70 - 2021-08-17 12:18 PM		TNF		cytokine		0.181		0.059	-0.032	1.39e-08	Ccl7,CP,CTSC,DCN,EHD1,ERCC1,FOXC2,IL1R1,IL23A,JUN,LBP,MSR1,SOD3,TGFA,TLR2,WLS	ERK,JUN,TNF
Meta_70 - 2021-08-17 12:18 PM		IL10		cytokine		0.709		-0.035	0.786	8.62e-07	Ccl7,Cd24a,CTSC,DCN,IL23A,LGMN,MSR1,TLR2
Meta_70 - 2021-08-17 12:18 PM		MMP1		peptidase		1		0.118	0.765	2.33e-06	ANGPT1,JUN,PDGFA,S100A4
Meta_70 - 2021-08-17 12:18 PM		AHR		ligand-dependent nuclear receptor		-1.327		0.034	-1.422	2.74e-06	CADM4,COL6A1,DCN,EGLN1,EHD1,IL1R1,LBP,PDGFRA,PDGFRB
Meta_70 - 2021-08-17 12:18 PM		NREP		other						1.47e-05	PDGFA,PDGFRA,PDGFRB
Meta_70 - 2021-08-17 12:18 PM		CTNNB1		transcription regulator		-1.664		0.063	-1.818	1.86e-05	Ccl7,EHD1,ENO3,FOXC2,ID3,IL1R1,JUN,PPP3CA,SLC6A2,TCF3,TGFA	CTNNB1,TCF
Meta_70 - 2021-08-17 12:18 PM		CCR2		g-protein coupled receptor		1.342		0.079	1.165	2.06e-05	Ccl7,COL6A1,DCN,IL23A,PCOLCE
Meta_70 - 2021-08-17 12:18 PM		OGA		enzyme		1.134		-0.007	1.153	2.81e-05	Cd24a,EFNB1,EPHB6,IL23A,JUN,PLD4,TGFA,TGFBR3
Meta_70 - 2021-08-17 12:18 PM		TGFB1		growth factor		0.374		0.031	0.284	3.03e-05	Ccl7,EGLN1,IL23A,JUN,NDC80,PDGFA,S100A4,SOD3,TGFA,TGFBR3	Ap1,ERK,HIF1A,JUN,TGFB1
Meta_70 - 2021-08-17 12:18 PM		MARCHF5		enzyme						5.46e-05	COL6A1,PDGFRB
Meta_70 - 2021-08-17 12:18 PM		TNFRSF1A		transmembrane receptor		-0.555		0.029	-0.619	6.18e-05	IL23A,JUN,LBP,PDGFA,TGFA	Ap1,ERK,HIF1A,JUN,TGFB1,TNFRSF1A
Meta_70 - 2021-08-17 12:18 PM		P38 MAPK		group		-0.669		0.093	-0.848	6.53e-05	IL23A,JUN,SLC6A2,TCF3,TGFA,TLR2	ERK,JUN,P38 MAPK
Meta_70 - 2021-08-17 12:18 PM		PTX3		other						7.5e-05	Ccl7,JUN,TLR2
Meta_70 - 2021-08-17 12:18 PM		NEIL2		enzyme						8.13e-05	Ccl7,IL1R1,IL23A,TLR2
Meta_70 - 2021-08-17 12:18 PM		CBFB		transcription regulator		-1.067		-0.011	-1.046	0.00011	FOXC2,KCNK5,LGMN,TGFBR3
Meta_70 - 2021-08-17 12:18 PM		TNFRSF1B		transmembrane receptor		0		0.053	-0.107	0.00011	JUN,LBP,PDGFA,TGFA
Meta_70 - 2021-08-17 12:18 PM		CARD9		other						0.000114	CLEC6A,IL23A,TLR2
Meta_70 - 2021-08-17 12:18 PM		TSC2		other		0.555		-0.075	0.72	0.000129	CP,EGLN1,IL1R1,PDGFRA,PDGFRB
Meta_70 - 2021-08-17 12:18 PM		TCL1A		transcription regulator						0.000132	CD300LD,CLEC6A,CTSC,MSR1
Meta_70 - 2021-08-17 12:18 PM		H3-3A/H3-3B		other						0.000136	PDGFA,PDGFRA
Meta_70 - 2021-08-17 12:18 PM		ARHGAP31		other						0.000138	COL6A1,JUN,TGFBR3
Meta_70 - 2021-08-17 12:18 PM		IL6		cytokine		0.733		0.052	0.599	0.000156	ANGPT1,DCN,IL1R1,JUN,LBP,LYZ,PDGFA
Meta_70 - 2021-08-17 12:18 PM		CRNDE		other						0.00018	IL1R1,PDGFA,PDGFRB
Meta_70 - 2021-08-17 12:18 PM		FGF2		growth factor						0.000185	DCN,ID3,JUN,S100A4,TGFBR3
Meta_70 - 2021-08-17 12:18 PM		PYGO2		other						0.00019	PDGFRA,PDGFRB
Meta_70 - 2021-08-17 12:18 PM		SMAD1/5		group						0.00019	ID3,PDGFA
Meta_70 - 2021-08-17 12:18 PM		DYSF		other						0.000195	Ccl7,LYZ,PDGFRA,S100A4
Meta_70 - 2021-08-17 12:18 PM		CD14		transmembrane receptor						0.000211	IL1R1,MSR1,TLR2
Meta_70 - 2021-08-17 12:18 PM		BMP7		growth factor						0.000238	FOXC2,IBSP,PDGFRB,TCF3
Meta_70 - 2021-08-17 12:18 PM		SMARCA4		transcription regulator		1.342		0.101	1.117	0.000239	CP,EFNB1,ENO3,ID3,IL23A,JUN,SOD3,TLR2
Meta_70 - 2021-08-17 12:18 PM		CD5L		transmembrane receptor						0.000253	Ccl7,TLR2
Meta_70 - 2021-08-17 12:18 PM		NORAD		other						0.000265	ID3,JUN,PDGFA
Meta_70 - 2021-08-17 12:18 PM		ETS2		transcription regulator						0.000285	JUN,LYZ,MSR1
Meta_70 - 2021-08-17 12:18 PM		IL10RA		transmembrane receptor		0.816		0.003	0.81	0.00031	Cd24a,DCN,IL23A,PCOLCE,PDGFRA,TLR2
Meta_70 - 2021-08-17 12:18 PM		PDGFRB	0.815	kinase						0.000325	PDGFRB,RGS5
Meta_70 - 2021-08-17 12:18 PM		ESR2		ligand-dependent nuclear receptor		-0.478		0.044	-0.593	0.000344	FOXC2,IBSP,IL1R1,IL23A,PCOLCE,PDGFA,TGFA
Meta_70 - 2021-08-17 12:18 PM		SMAD3		transcription regulator						0.00037	IBSP,ID3,IL23A,JUN,TGFA	ERK,JUN,SMAD3
Meta_70 - 2021-08-17 12:18 PM		IGF1		growth factor		0.64		0.038	0.548	0.000408	Ccl7,CP,DCN,JUN,PDGFRA,TGFA	ERK,IGF1,JUN
Meta_70 - 2021-08-17 12:18 PM		ATF2		transcription regulator						0.000424	IL23A,JUN,PDGFRA
Meta_70 - 2021-08-17 12:18 PM		RXRB		ligand-dependent nuclear receptor						0.000424	LYZ,PDGFA,S100A4
Meta_70 - 2021-08-17 12:18 PM		DYRK1B		kinase						0.000494	CP,SOD3
Meta_70 - 2021-08-17 12:18 PM		miR-146a-5p (and other miRNAs w/seed GAGAACU)		mature microrna						0.000507	IL1R1,LBP,PDGFRA
Meta_70 - 2021-08-17 12:18 PM		PRL		cytokine		0.418		0.081	0.238	0.000514	DCN,ID3,JUN,PCOLCE,PDGFRA
Meta_70 - 2021-08-17 12:18 PM		IL1B		cytokine		1.247		0.03	1.182	0.00052	IBSP,IL1R1,IL23A,JUN,LBP,PDGFRA,TLR2	ATF2,IL1B
Meta_70 - 2021-08-17 12:18 PM		GLI1		transcription regulator		0.378		-0.024	0.442	0.000527	EPHB6,ID3,IER5L,PDGFA,PDGFRA,S100A4,TGFBR3
Meta_70 - 2021-08-17 12:18 PM		MAPKAPK2		kinase						0.000568	Ccl7,IL23A,MSR1
Meta_70 - 2021-08-17 12:18 PM		DDX17		enzyme						0.000592	JUN,S100A4
Meta_70 - 2021-08-17 12:18 PM		EIF4G2		translation regulator						0.000592	EGLN1,JUN
Meta_70 - 2021-08-17 12:18 PM		LOX		enzyme						0.000592	PDGFRA,PDGFRB
Meta_70 - 2021-08-17 12:18 PM		EGR1		transcription regulator		1.109		0.092	0.931	0.000614	Ccl7,JUN,LYZ,PDGFA
Meta_70 - 2021-08-17 12:18 PM		IKBKG		kinase		1.131		0.086	0.961	0.00067	CP,DCN,FOXC2,SOD3
Meta_70 - 2021-08-17 12:18 PM		PCSK9		peptidase						0.000812	Ccl7,TLR2	LDL,NFKBIA,PCSK9
Meta_70 - 2021-08-17 12:18 PM		IKBKB		kinase		0.208		0.064	0.069	0.000843	CP,DCN,EGLN1,S100A4,SOD3
Meta_70 - 2021-08-17 12:18 PM		TET2		enzyme		-0.577		0.048	-0.661	0.000884	Ccl7,IL1R1,PDGFRB,TGFA
Meta_70 - 2021-08-17 12:18 PM		CHUK		kinase		1.131		0.102	0.929	0.000982	CP,DCN,FOXC2,SOD3
Meta_70 - 2021-08-17 12:18 PM		CIP2A		other						0.000986	DCN,ENO3,PDGFRB
Meta_70 - 2021-08-17 12:18 PM		SMAD5		transcription regulator						0.00107	ID3,PDGFA
Meta_70 - 2021-08-17 12:18 PM		Ap1		complex						0.00108	IL23A,JUN,S100A4
Meta_70 - 2021-08-17 12:18 PM		TCF3	-0.272	transcription regulator						0.0011	Clec2d (includes others),ID3,JUN,NDC80,TCF3
Meta_70 - 2021-08-17 12:18 PM		ERK		group		-1.067		0.074	-1.214	0.00114	Ccl7,IL23A,JUN,TGFA	ERK,JUN
Meta_70 - 2021-08-17 12:18 PM		KRAS		enzyme						0.00116	JUN,MSR1,PCOLCE,S100A4,TGFA,TLR2
Meta_70 - 2021-08-17 12:18 PM		COL18A1		other						0.00123	EGLN1,ID3,JUN
Meta_70 - 2021-08-17 12:18 PM		SOX1		transcription regulator						0.00133	ANGPT1,PDGFRA,WLS
Meta_70 - 2021-08-17 12:18 PM		SOCS6		other						0.00136	Ccl7,IL23A
Meta_70 - 2021-08-17 12:18 PM		HIF1A		transcription regulator		-0.129		0.054	-0.259	0.00146	Ccl7,EGLN1,JUN,PDGFA,TGFA,TLR2
Meta_70 - 2021-08-17 12:18 PM		NFIC		transcription regulator						0.00151	PDGFA,PDGFRA
Meta_70 - 2021-08-17 12:18 PM		SOX3		transcription regulator						0.00156	ANGPT1,PDGFRA,WLS
Meta_70 - 2021-08-17 12:18 PM		CSF2		cytokine		0.199		0.103	-0.026	0.00161	CTSC,IL1R1,IL23A,JUN,TLR2	ATF2,CSF2,IL1B
Meta_70 - 2021-08-17 12:18 PM		Pka		complex						0.00168	IL23A,JUN,TCF3	Ap1,Pka
Meta_70 - 2021-08-17 12:18 PM		TCF		group						0.00181	ID3,IL1R1,SLC6A2	CTNNB1,TCF
Meta_70 - 2021-08-17 12:18 PM		SOX2		transcription regulator	Inhibited	-2.236		0.041	-2.329	0.00184	ANGPT1,ID3,IER5L,IL23A,PDGFRA,WLS
Meta_70 - 2021-08-17 12:18 PM		IL36A		cytokine						0.00185	Ccl7,IL23A
Meta_70 - 2021-08-17 12:18 PM		PDGFC		growth factor						0.00185	PDGFRA,PDGFRB
Meta_70 - 2021-08-17 12:18 PM		mir-135		microrna						0.00185	Ccl7,IL1R1
Meta_70 - 2021-08-17 12:18 PM		GMNN		transcription regulator						0.00188	ANGPT1,PDGFRA,WLS
Meta_70 - 2021-08-17 12:18 PM		EZH2		transcription regulator		0		0.024	-0.048	0.00197	IBSP,IL23A,PDGFA,PDGFRA,S100A4
Meta_70 - 2021-08-17 12:18 PM		JUN	-0.352	transcription regulator						0.00203	Ccl7,IBSP,IL23A,JUN,PRDX1
Meta_70 - 2021-08-17 12:18 PM		FOXF2		transcription regulator						0.00203	PDGFA,PDGFRA
Meta_70 - 2021-08-17 12:18 PM		PDGF-DD		complex						0.00222	Ccl7,PDGFRA
Meta_70 - 2021-08-17 12:18 PM		PDGFB		growth factor						0.00222	PDGFRB,RGS5
Meta_70 - 2021-08-17 12:18 PM		LDL		complex						0.00223	Ccl7,MSR1,TLR2	LDL,NFKBIA
Meta_70 - 2021-08-17 12:18 PM		TFRC		transporter						0.00231	JUN,MS4A6A,PLD4
Meta_70 - 2021-08-17 12:18 PM		IL15		cytokine		-0.152		0.067	-0.284	0.00232	EGLN1,ENO3,JUN,TLR2
Meta_70 - 2021-08-17 12:18 PM		PTH		other						0.00239	ANGPT1,JUN,PDGFA
Meta_70 - 2021-08-17 12:18 PM		SIGIRR		transmembrane receptor						0.00242	IL1R1,IL23A
Meta_70 - 2021-08-17 12:18 PM		TRPV4		ion channel						0.00242	Ccl7,TLR2
Meta_70 - 2021-08-17 12:18 PM		HMOX1		enzyme						0.00255	ANGPT1,ID3,IL23A
Meta_70 - 2021-08-17 12:18 PM		NFKBIA		transcription regulator						0.00255	Ccl7,LYZ,TLR2
Meta_70 - 2021-08-17 12:18 PM		BMP10		growth factor						0.00271	ANGPT1,ID3,MSR1
Meta_70 - 2021-08-17 12:18 PM		SMO		g-protein coupled receptor						0.00283	FOXC2,TGFA
Meta_70 - 2021-08-17 12:18 PM		EP300		transcription regulator						0.00285	ANGPT1,ID3,JUN,PDGFRB,TLR2
Meta_70 - 2021-08-17 12:18 PM		ATOX1		transporter						0.00305	SOD3
Meta_70 - 2021-08-17 12:18 PM		EHD4		enzyme						0.00305	EHD1
Meta_70 - 2021-08-17 12:18 PM		HOOK3		other						0.00305	MSR1
Meta_70 - 2021-08-17 12:18 PM		PRR5		other						0.00305	PDGFRB
Meta_70 - 2021-08-17 12:18 PM		RNF7		enzyme						0.00305	JUN
Meta_70 - 2021-08-17 12:18 PM		SEC22B		other						0.00305	NBEAL2
Meta_70 - 2021-08-17 12:18 PM		VANGL1		other						0.00305	JUN
Meta_70 - 2021-08-17 12:18 PM		MIF		cytokine						0.00315	IL1R1,IL23A,JUN	ATF2,IL1B,MIF
Meta_70 - 2021-08-17 12:18 PM		PSEN2		peptidase						0.00315	CTSC,PDGFRA,PDGFRB
Meta_70 - 2021-08-17 12:18 PM		HTT		transcription regulator						0.00337	COL6A1,DCN,ENO3,JUN,PPP3CA,TCF3
Meta_70 - 2021-08-17 12:18 PM		F2R		g-protein coupled receptor						0.00352	ANGPT1,S100A4
Meta_70 - 2021-08-17 12:18 PM		RPSA		translation regulator						0.00352	Ccl7,IL1R1
Meta_70 - 2021-08-17 12:18 PM		TP53		transcription regulator		0.841		0.013	0.798	0.00366	CP,ENO3,ERCC1,ID3,LYZ,NDC80,PDGFA,PDGFRA,PDGFRB,PPP3CA,S100A4,TGFA
Meta_70 - 2021-08-17 12:18 PM		PPARGC1A		transcription regulator		-1.159		0.032	-1.228	0.00374	Ccl7,CTSC,DCN,EGLN1,PDGFRL
Meta_70 - 2021-08-17 12:18 PM		ALOX15		enzyme						0.00376	ID3,JUN
Meta_70 - 2021-08-17 12:18 PM		NFYB		transcription regulator						0.00376	IBSP,S100A4
Meta_70 - 2021-08-17 12:18 PM		TANK		other						0.00376	Ccl7,IL23A
Meta_70 - 2021-08-17 12:18 PM		estrogen receptor		group		-1		-0.004	-0.991	0.00381	COL6A1,PDGFA,TGFA,TGFBR3
Meta_70 - 2021-08-17 12:18 PM		VDR		transcription regulator		-0.655		0.028	-0.709	0.00394	Clec2d (includes others),JUN,TCF3,TLR2
Meta_70 - 2021-08-17 12:18 PM		HEIH		other						0.00427	JUN,PDGFRB
Meta_70 - 2021-08-17 12:18 PM		NFATC3		transcription regulator						0.00427	ANGPT1,JUN
Meta_70 - 2021-08-17 12:18 PM		HOXC6		transcription regulator						0.00454	DCN,PDGFRA
Meta_70 - 2021-08-17 12:18 PM		NOTCH3		transcription regulator						0.00454	MSR1,PDGFRB
Meta_70 - 2021-08-17 12:18 PM		AGTR1		g-protein coupled receptor						0.00482	CP,JUN
Meta_70 - 2021-08-17 12:18 PM		FHL2		transcription regulator						0.0051	IL23A,PDGFRB
Meta_70 - 2021-08-17 12:18 PM		KDM2B		enzyme						0.0051	Ccl7,PDGFRA
Meta_70 - 2021-08-17 12:18 PM		PDGF BB		complex						0.00536	Ccl7,FOXC2,JUN
Meta_70 - 2021-08-17 12:18 PM		NSD2		enzyme						0.00539	ERCC1,JUN
Meta_70 - 2021-08-17 12:18 PM		VEGFA		growth factor						0.00562	ANGPT1,PDGFRB,RGS5
Meta_70 - 2021-08-17 12:18 PM		PSEN1		peptidase		0.247		-0.011	0.27	0.00565	CTSC,MSR1,PDGFRA,PDGFRB,PLVAP
Meta_70 - 2021-08-17 12:18 PM		BMPR1A		kinase						0.00568	IBSP,ID3
Meta_70 - 2021-08-17 12:18 PM		Alpha catenin		group						0.00575	COL6A1,LYZ,PDGFRA
Meta_70 - 2021-08-17 12:18 PM		LIPE		enzyme						0.00589	ANGPT1,CP,RGS5
Meta_70 - 2021-08-17 12:18 PM		ABCB4		transporter						0.00599	PDGFA,PDGFRB
Meta_70 - 2021-08-17 12:18 PM		ADAMTS9-AS2		other						0.00608	TGFBR3
Meta_70 - 2021-08-17 12:18 PM		CCL18		cytokine						0.00608	S100A4
Meta_70 - 2021-08-17 12:18 PM		CD82		other						0.00608	DCN
Meta_70 - 2021-08-17 12:18 PM		CLCF1		cytokine						0.00608	MSR1
Meta_70 - 2021-08-17 12:18 PM		DTL		other						0.00608	IL23A
Meta_70 - 2021-08-17 12:18 PM		EIF4E2		translation regulator						0.00608	PDGFRA
Meta_70 - 2021-08-17 12:18 PM		EPN3		other						0.00608	EHD1
Meta_70 - 2021-08-17 12:18 PM		Gpcr		group						0.00608	JUN
Meta_70 - 2021-08-17 12:18 PM		IL17RC		transmembrane receptor						0.00608	PLET1
Meta_70 - 2021-08-17 12:18 PM		NAGLU		enzyme						0.00608	LYZ
Meta_70 - 2021-08-17 12:18 PM		TIAM1		other						0.00608	JUN
Meta_70 - 2021-08-17 12:18 PM		mir-499		microrna						0.00608	PPP3CA
Meta_70 - 2021-08-17 12:18 PM		potassium channel		group						0.00608	JUN
Meta_70 - 2021-08-17 12:18 PM		CDK19		kinase						0.00616	JUN,PDGFA,TGFA
Meta_70 - 2021-08-17 12:18 PM		LDLR		transporter						0.00629	Ccl7,CTSC,LYZ,MSR1
Meta_70 - 2021-08-17 12:18 PM		PSMB11		peptidase						0.0063	Ccl7,COL6A1,IL23A
Meta_70 - 2021-08-17 12:18 PM		LTBR		transmembrane receptor						0.00662	LYZ,PDGFRB
Meta_70 - 2021-08-17 12:18 PM		RAG1		enzyme						0.00662	IBSP,IL23A
Meta_70 - 2021-08-17 12:18 PM		PRKAA2		kinase						0.00674	IL1R1,PCOLCE,PDGFRA
Meta_70 - 2021-08-17 12:18 PM		C3AR1		g-protein coupled receptor						0.00694	DCN,IL23A
Meta_70 - 2021-08-17 12:18 PM		CCN5		growth factor						0.00694	JUN,TGFBR3
Meta_70 - 2021-08-17 12:18 PM		PIK3CA		kinase						0.00694	PDGFRA,PDGFRB
Meta_70 - 2021-08-17 12:18 PM		GFI1		transcription regulator						0.0075	IL1R1,JUN,LYZ
Meta_70 - 2021-08-17 12:18 PM		CSF1		cytokine						0.00765	Ccl7,JUN,TLR2	CSF1,HIF1A,IL1A
Meta_70 - 2021-08-17 12:18 PM		VCAN		other						0.00765	DCN,LBP,TGFA
Meta_70 - 2021-08-17 12:18 PM		mir-223		microrna						0.00765	Clec2d (includes others),Glrp1,IL23A
Meta_70 - 2021-08-17 12:18 PM		RPTOR		other						0.00781	EGLN1,IL1R1,JUN
Meta_70 - 2021-08-17 12:18 PM		EGR3		transcription regulator						0.00796	EFNB1,ID3
Meta_70 - 2021-08-17 12:18 PM		ADRA1B		g-protein coupled receptor						0.00832	JUN,PPP3CA
Meta_70 - 2021-08-17 12:18 PM		TIMP3		other						0.00832	JUN,TGFBR3
Meta_70 - 2021-08-17 12:18 PM		IL1A		cytokine						0.00847	JUN,PDGFA,TLR2	HIF1A,IL1A
Meta_70 - 2021-08-17 12:18 PM		Hbb-b2		other						0.00868	Ccl7,TLR2
Meta_70 - 2021-08-17 12:18 PM		NCOA2		transcription regulator						0.00881	LYZ,PRDX1,SOD3
Meta_70 - 2021-08-17 12:18 PM		SOX11		transcription regulator						0.00881	CP,PDGFA,PPP3CA
Meta_70 - 2021-08-17 12:18 PM		NFAT5		transcription regulator						0.00899	IL23A,S100A4,TLR2
Meta_70 - 2021-08-17 12:18 PM		ADRA1D		g-protein coupled receptor						0.00905	JUN,PPP3CA
Meta_70 - 2021-08-17 12:18 PM		IFNGR1		transmembrane receptor						0.00905	IL23A,PDGFRB
Meta_70 - 2021-08-17 12:18 PM		IL13		cytokine		1.922		0.044	1.837	0.00907	CTSC,IL1R1,MS4A4A,PDGFA
Meta_70 - 2021-08-17 12:18 PM		BCLAF3		other						0.00911	IL23A
Meta_70 - 2021-08-17 12:18 PM		BMP1		peptidase						0.00911	DCN
Meta_70 - 2021-08-17 12:18 PM		BTG1		transcription regulator						0.00911	JUN
Meta_70 - 2021-08-17 12:18 PM		CHTOP		other						0.00911	TGFA
Meta_70 - 2021-08-17 12:18 PM		DLST		enzyme						0.00911	JUN
Meta_70 - 2021-08-17 12:18 PM		EEF1A1		translation regulator						0.00911	S100A4
Meta_70 - 2021-08-17 12:18 PM		GK		kinase						0.00911	ENO3
Meta_70 - 2021-08-17 12:18 PM		HSD17B14		enzyme						0.00911	IL23A
Meta_70 - 2021-08-17 12:18 PM		IFT20		other						0.00911	PDGFRA
Meta_70 - 2021-08-17 12:18 PM		KLHL2		other						0.00911	JUN
Meta_70 - 2021-08-17 12:18 PM		LZTS2		other						0.00911	TCF3
Meta_70 - 2021-08-17 12:18 PM		MAPK8IP3		other						0.00911	JUN
Meta_70 - 2021-08-17 12:18 PM		PRR7		other						0.00911	JUN
Meta_70 - 2021-08-17 12:18 PM		Ras homolog		group						0.00911	PDGFRA
Meta_70 - 2021-08-17 12:18 PM		nicotinic acetylcholine receptor		complex						0.00911	JUN
Meta_70 - 2021-08-17 12:18 PM		EGR2		transcription regulator						0.00942	ID3,JUN
Meta_70 - 2021-08-17 12:18 PM		ADRA1A		g-protein coupled receptor						0.0098	JUN,PPP3CA
Meta_70 - 2021-08-17 12:18 PM		CLEC4G		other						0.0098	IL23A,PDGFA
Meta_70 - 2021-08-17 12:18 PM		PTPN1		phosphatase						0.0098	Ccl7,IL23A	ERK,JUN,PTPN1
Meta_70 - 2021-08-17 12:18 PM		Fcer1		complex						0.0106	Ccl7,JUN
Meta_70 - 2021-08-17 12:18 PM		SQSTM1		transcription regulator						0.0106	Ccl7,JUN
Meta_70 - 2021-08-17 12:18 PM		IL1R1	0.299	transmembrane receptor						0.011	Ccl7,LBP
Meta_70 - 2021-08-17 12:18 PM		PRKD1		kinase						0.011	IBSP,IL23A
Meta_70 - 2021-08-17 12:18 PM		PTGER4		g-protein coupled receptor						0.011	Ccl7,CP,IL23A
Meta_70 - 2021-08-17 12:18 PM		TCR		complex						0.011	ID3,JUN,KCNK5,TCF3
Meta_70 - 2021-08-17 12:18 PM		IFNG		cytokine		0.409		0.052	0.273	0.0113	Ccl7,CP,IL23A,JUN,SOD3,TGFBR3,TLR2
Meta_70 - 2021-08-17 12:18 PM		SMAD7		transcription regulator						0.0114	ID3,TGFA
Meta_70 - 2021-08-17 12:18 PM		CD38		enzyme						0.0114	EGLN1,PPP3CA,S100A4
Meta_70 - 2021-08-17 12:18 PM		STAT1		transcription regulator		0		0.071	-0.142	0.0116	IL23A,JUN,PDGFA,PDGFRB
Meta_70 - 2021-08-17 12:18 PM		HSP90B1		other						0.0118	IL23A,TLR2
Meta_70 - 2021-08-17 12:18 PM		TWIST1		transcription regulator						0.0118	DCN,S100A4
Meta_70 - 2021-08-17 12:18 PM		PTGS2		enzyme						0.012	ANGPT1,IL23A,MSR1
Meta_70 - 2021-08-17 12:18 PM		AATF		transcription regulator						0.0121	JUN
Meta_70 - 2021-08-17 12:18 PM		CHRM1		g-protein coupled receptor						0.0121	JUN
Meta_70 - 2021-08-17 12:18 PM		CITED1		transcription regulator						0.0121	TGFA
Meta_70 - 2021-08-17 12:18 PM		CTSA		peptidase						0.0121	SOD3
Meta_70 - 2021-08-17 12:18 PM		Foxe3		transcription regulator						0.0121	PDGFRA
Meta_70 - 2021-08-17 12:18 PM		OTULIN		peptidase						0.0121	ID3
Meta_70 - 2021-08-17 12:18 PM		PAXIP1		other						0.0121	ENO3
Meta_70 - 2021-08-17 12:18 PM		PHOX2A		transcription regulator						0.0121	SLC6A2
Meta_70 - 2021-08-17 12:18 PM		PLCB1		enzyme						0.0121	Cd24a
Meta_70 - 2021-08-17 12:18 PM		RAB11FIP3		other						0.0121	JUN
Meta_70 - 2021-08-17 12:18 PM		RSPO2		other						0.0121	IBSP
Meta_70 - 2021-08-17 12:18 PM		SFTPC		other						0.0121	S100A4
Meta_70 - 2021-08-17 12:18 PM		TEK		kinase						0.0121	ANGPT1
Meta_70 - 2021-08-17 12:18 PM		Ccl2		cytokine						0.0122	Ccl7,IL23A
Meta_70 - 2021-08-17 12:18 PM		MYOD1		transcription regulator						0.0122	ENO3,PDGFA
Meta_70 - 2021-08-17 12:18 PM		MAPK9		kinase						0.0122	Ccl7,JUN,SOD3
Meta_70 - 2021-08-17 12:18 PM		PRKAA1		kinase						0.0125	IL1R1,PCOLCE,PDGFRA
Meta_70 - 2021-08-17 12:18 PM		SMARCA2		transcription regulator						0.0127	CP,SLC6A2
Meta_70 - 2021-08-17 12:18 PM		IL4		cytokine		-0.447		0.088	-0.644	0.0128	Ccl7,Cd24a,EGLN1,IL1R1,JUN,PRSS22
Meta_70 - 2021-08-17 12:18 PM		MEF2C		transcription regulator						0.0131	IBSP,JUN
Meta_70 - 2021-08-17 12:18 PM		CDKN2A		transcription regulator						0.0133	Ccl7,JUN,PDGFRB
Meta_70 - 2021-08-17 12:18 PM		S100A8		other						0.0133	Ccl7,CP,IL23A
Meta_70 - 2021-08-17 12:18 PM		BACH2		transcription regulator						0.0135	ID3,JUN
Meta_70 - 2021-08-17 12:18 PM		SRC		kinase						0.0135	IBSP,JUN
Meta_70 - 2021-08-17 12:18 PM		Histone h3		group						0.0137	ENO3,JUN,SLC6A2,TLR2,WLS
Meta_70 - 2021-08-17 12:18 PM		POU5F1		transcription regulator						0.0137	ANGPT1,IER5L,PDGFRA,WLS
Meta_70 - 2021-08-17 12:18 PM		MRTFB		transcription regulator						0.0138	PDGFRA,PDGFRL,ZFPM1
Meta_70 - 2021-08-17 12:18 PM		MYC		transcription regulator		0.735		0.068	0.572	0.0142	ANGPT1,JUN,MSR1,PDGFRA,PDGFRB,TCF3,WLS
Meta_70 - 2021-08-17 12:18 PM		C5AR1		g-protein coupled receptor						0.0144	DCN,IL23A
Meta_70 - 2021-08-17 12:18 PM		KITLG		growth factor						0.0144	Cd24a,TCF3
Meta_70 - 2021-08-17 12:18 PM		NR1H4		ligand-dependent nuclear receptor						0.0144	COL6A1,CTSC,SOD3
Meta_70 - 2021-08-17 12:18 PM		MEF2D		transcription regulator						0.0149	JUN,SOD3
Meta_70 - 2021-08-17 12:18 PM		ATXN8OS		other						0.0151	ANGPT1
Meta_70 - 2021-08-17 12:18 PM		Cox5b/Gm34962		other						0.0151	PPP3CA
Meta_70 - 2021-08-17 12:18 PM		DUSP6		phosphatase						0.0151	ERCC1
Meta_70 - 2021-08-17 12:18 PM		FUT7		enzyme						0.0151	IL23A
Meta_70 - 2021-08-17 12:18 PM		HEPH		transporter						0.0151	CP
Meta_70 - 2021-08-17 12:18 PM		Muc1		transmembrane receptor						0.0151	PDGFA
Meta_70 - 2021-08-17 12:18 PM		Muscarinic cholinergic receptor		group						0.0151	JUN
Meta_70 - 2021-08-17 12:18 PM		NADPH oxidase		complex						0.0151	TGFA
Meta_70 - 2021-08-17 12:18 PM		NRP2		kinase						0.0151	S100A4
Meta_70 - 2021-08-17 12:18 PM		RNF187		enzyme						0.0151	JUN
Meta_70 - 2021-08-17 12:18 PM		SIX3		transcription regulator						0.0151	PDGFRA
Meta_70 - 2021-08-17 12:18 PM		ZMIZ2		transcription regulator						0.0151	JUN
Meta_70 - 2021-08-17 12:18 PM		miR-223-3p (miRNAs w/seed GUCAGUU)		mature microrna						0.0151	TGFBR3
Meta_70 - 2021-08-17 12:18 PM		mir-191		microrna						0.0151	TCF3
Meta_70 - 2021-08-17 12:18 PM		RXRA		ligand-dependent nuclear receptor						0.0151	LYZ,PDGFA,S100A4
Meta_70 - 2021-08-17 12:18 PM		RELA		transcription regulator		-0.317		0.104	-0.494	0.0153	EGLN1,IL23A,JUN,TLR2
Meta_70 - 2021-08-17 12:18 PM		DDX5		enzyme						0.0154	JUN,S100A4
Meta_70 - 2021-08-17 12:18 PM		ZBTB17		transcription regulator						0.0154	JUN,NDC80
Meta_70 - 2021-08-17 12:18 PM		mir-29		microrna						0.0154	IL23A,PDGFA
Meta_70 - 2021-08-17 12:18 PM		CREBBP		transcription regulator						0.0156	ANGPT1,JUN,PDGFRB,TLR2
Meta_70 - 2021-08-17 12:18 PM		SNAI1		transcription regulator						0.0158	ERCC1,IBSP
Meta_70 - 2021-08-17 12:18 PM		TEAD1		transcription regulator						0.0158	PDGFRL,TGFA
Meta_70 - 2021-08-17 12:18 PM		CD3		complex						0.0161	JUN,TCF3,TLR2
Meta_70 - 2021-08-17 12:18 PM		NOS2		enzyme						0.0164	Ccl7,CP,CTSC
Meta_70 - 2021-08-17 12:18 PM		CAMP		other						0.0168	IL23A,TLR2
Meta_70 - 2021-08-17 12:18 PM		TCF4		transcription regulator						0.0178	Clec2d (includes others),ID3,NDC80,WLS
Meta_70 - 2021-08-17 12:18 PM		IL5		cytokine						0.0179	CTSC,EGLN1,S100A4
Meta_70 - 2021-08-17 12:18 PM		AKAP12		transporter						0.0181	ANGPT1
Meta_70 - 2021-08-17 12:18 PM		ANGPTL6		other						0.0181	ANGPT1
Meta_70 - 2021-08-17 12:18 PM		Agtr1b		g-protein coupled receptor						0.0181	SLC6A2
Meta_70 - 2021-08-17 12:18 PM		CPXM1		peptidase						0.0181	COL6A1
Meta_70 - 2021-08-17 12:18 PM		Cyclin E		group						0.0181	EGLN1
Meta_70 - 2021-08-17 12:18 PM		DSPP		other						0.0181	DCN
Meta_70 - 2021-08-17 12:18 PM		EEF2K		kinase						0.0181	DCN
Meta_70 - 2021-08-17 12:18 PM		HIVEP3		transcription regulator						0.0181	S100A4
Meta_70 - 2021-08-17 12:18 PM		HTR4		g-protein coupled receptor						0.0181	ANGPT1
Meta_70 - 2021-08-17 12:18 PM		Integrin		complex						0.0181	JUN
Meta_70 - 2021-08-17 12:18 PM		MEFV		other						0.0181	LYZ
Meta_70 - 2021-08-17 12:18 PM		PRKG2		kinase						0.0181	PDGFRA
Meta_70 - 2021-08-17 12:18 PM		Presenilin		group						0.0181	EGLN1
Meta_70 - 2021-08-17 12:18 PM		SERCA		group						0.0181	JUN
Meta_70 - 2021-08-17 12:18 PM		SLC7A11-AS1		other						0.0181	JUN
Meta_70 - 2021-08-17 12:18 PM		SLIT2		other						0.0181	IL23A
Meta_70 - 2021-08-17 12:18 PM		SOX8		transcription regulator						0.0181	IBSP
Meta_70 - 2021-08-17 12:18 PM		KCNE3		ion channel						0.0183	IBSP,KCNK5
Meta_70 - 2021-08-17 12:18 PM		KLF5		transcription regulator						0.0183	ID3,JUN
Meta_70 - 2021-08-17 12:18 PM		NR4A2		ligand-dependent nuclear receptor						0.0183	COL6A1,IL23A
Meta_70 - 2021-08-17 12:18 PM		CISH		other						0.0188	CLEC6A,ID3
Meta_70 - 2021-08-17 12:18 PM		CX3CL1		cytokine						0.0188	LYZ,MSR1
Meta_70 - 2021-08-17 12:18 PM		MAP2K1		kinase						0.0188	JUN,PDGFRA
Meta_70 - 2021-08-17 12:18 PM		TSC1		other						0.0188	PDGFRA,PDGFRB
Meta_70 - 2021-08-17 12:18 PM		Mek		group						0.0192	JUN,PDGFRA,PDGFRB
Meta_70 - 2021-08-17 12:18 PM		ELOVL3		enzyme						0.0193	LYZ,MSR1
Meta_70 - 2021-08-17 12:18 PM		CD44		other						0.0195	Ccl7,JUN,SBK1
Meta_70 - 2021-08-17 12:18 PM		TLR7		transmembrane receptor						0.0197	Ccl7,IL1R1,IL23A
Meta_70 - 2021-08-17 12:18 PM		PAX7		transcription regulator						0.0198	Cd24a,ID3
Meta_70 - 2021-08-17 12:18 PM		LCN2		transporter						0.0204	Ccl7,IL23A
Meta_70 - 2021-08-17 12:18 PM		Map3k7		kinase						0.0204	Ccl7,JUN
Meta_70 - 2021-08-17 12:18 PM		TREM1		transmembrane receptor						0.0209	IL1R1,IL23A,TLR2
Meta_70 - 2021-08-17 12:18 PM		BMP6		growth factor						0.0209	IBSP,ID3
Meta_70 - 2021-08-17 12:18 PM		ALOX12		enzyme						0.0211	JUN
Meta_70 - 2021-08-17 12:18 PM		AVPR1A		g-protein coupled receptor						0.0211	IBSP
Meta_70 - 2021-08-17 12:18 PM		CXCL17		cytokine						0.0211	IL23A
Meta_70 - 2021-08-17 12:18 PM		DES		other						0.0211	DCN
Meta_70 - 2021-08-17 12:18 PM		DRD5		g-protein coupled receptor						0.0211	IL23A
Meta_70 - 2021-08-17 12:18 PM		Hif		complex						0.0211	TGFA
Meta_70 - 2021-08-17 12:18 PM		Muc4		other						0.0211	LYZ
Meta_70 - 2021-08-17 12:18 PM		OXTR		g-protein coupled receptor						0.0211	IBSP
Meta_70 - 2021-08-17 12:18 PM		PDGF-AA		complex						0.0211	PDGFA
Meta_70 - 2021-08-17 12:18 PM		PDLIM7		other						0.0211	IBSP
Meta_70 - 2021-08-17 12:18 PM		PEA15		transporter						0.0211	JUN
Meta_70 - 2021-08-17 12:18 PM		PON1		phosphatase						0.0211	MSR1
Meta_70 - 2021-08-17 12:18 PM		RIOX1		enzyme						0.0211	IBSP
Meta_70 - 2021-08-17 12:18 PM		TFCP2		transcription regulator						0.0211	TGFA
Meta_70 - 2021-08-17 12:18 PM		WNT11		other						0.0211	IBSP
Meta_70 - 2021-08-17 12:18 PM		TGFBR2		kinase						0.0218	Ccl7,JUN,MSR1,PRSS22
Meta_70 - 2021-08-17 12:18 PM		Bvht		other						0.022	ANGPT1,FOXC2
Meta_70 - 2021-08-17 12:18 PM		IL22		cytokine						0.022	IL23A,LBP
Meta_70 - 2021-08-17 12:18 PM		ADAM12		peptidase						0.0225	Ccl7,DCN
Meta_70 - 2021-08-17 12:18 PM		IRAK4		kinase						0.0225	IL23A,JUN
Meta_70 - 2021-08-17 12:18 PM		PIK3R1		kinase						0.0225	PDGFRA,PDGFRB
Meta_70 - 2021-08-17 12:18 PM		STK40		kinase						0.0225	JUN,PDGFRA
Meta_70 - 2021-08-17 12:18 PM		PTTG1		transcription regulator						0.0231	ERCC1,TGFA
Meta_70 - 2021-08-17 12:18 PM		CSF3R		transmembrane receptor						0.0241	LYZ
Meta_70 - 2021-08-17 12:18 PM		Calcineurin A		group						0.0241	JUN
Meta_70 - 2021-08-17 12:18 PM		DACH1		transcription regulator						0.0241	JUN
Meta_70 - 2021-08-17 12:18 PM		GLRX		enzyme						0.0241	PDGFA
Meta_70 - 2021-08-17 12:18 PM		HPX		transporter						0.0241	IL23A
Meta_70 - 2021-08-17 12:18 PM		IL18BP		other						0.0241	IL23A
Meta_70 - 2021-08-17 12:18 PM		LASP1		transporter						0.0241	S100A4
Meta_70 - 2021-08-17 12:18 PM		MBIP		other						0.0241	JUN
Meta_70 - 2021-08-17 12:18 PM		MEMO1		other						0.0241	JUN
Meta_70 - 2021-08-17 12:18 PM		Ppp2c		group						0.0241	IL23A
Meta_70 - 2021-08-17 12:18 PM		SMN1/SMN2		other						0.0241	Ccl7
Meta_70 - 2021-08-17 12:18 PM		UBA7		enzyme						0.0241	IL23A
Meta_70 - 2021-08-17 12:18 PM		let-7a-5p (and other miRNAs w/seed GAGGUAG)		mature microrna						0.0242	PDGFA,S100A4
Meta_70 - 2021-08-17 12:18 PM		IKBKE		kinase						0.0254	ENO3,IL23A
Meta_70 - 2021-08-17 12:18 PM		ZBTB16		transcription regulator						0.0257	Ccl7,Cd24a,ID3
Meta_70 - 2021-08-17 12:18 PM		TPH1		enzyme						0.026	JUN,LGMN
Meta_70 - 2021-08-17 12:18 PM		FOXA2		transcription regulator						0.026	LYZ,PDGFRB,SOD3
Meta_70 - 2021-08-17 12:18 PM		B4GALT6		enzyme						0.0271	TLR2
Meta_70 - 2021-08-17 12:18 PM		CCDC88A		other						0.0271	IL23A
Meta_70 - 2021-08-17 12:18 PM		CTSK		peptidase						0.0271	TLR2
Meta_70 - 2021-08-17 12:18 PM		GIPR		g-protein coupled receptor						0.0271	Ccl7
Meta_70 - 2021-08-17 12:18 PM		IL12RB2		transmembrane receptor						0.0271	IL23A
Meta_70 - 2021-08-17 12:18 PM		MAP3K3		kinase						0.0271	JUN
Meta_70 - 2021-08-17 12:18 PM		MAPK10		kinase						0.0271	JUN
Meta_70 - 2021-08-17 12:18 PM		MVP		other						0.0271	JUN
Meta_70 - 2021-08-17 12:18 PM		MYF5		transcription regulator						0.0271	PDGFA
Meta_70 - 2021-08-17 12:18 PM		Mir218		microrna						0.0271	IBSP
Meta_70 - 2021-08-17 12:18 PM		SIAH2		transcription regulator						0.0271	ANGPT1
Meta_70 - 2021-08-17 12:18 PM		Smad		complex						0.0271	EGLN1
Meta_70 - 2021-08-17 12:18 PM		UTS2R		g-protein coupled receptor						0.0271	MSR1
Meta_70 - 2021-08-17 12:18 PM		ID2		transcription regulator						0.0273	ID3,PDGFA,TGFBR3
Meta_70 - 2021-08-17 12:18 PM		NR1H3		ligand-dependent nuclear receptor						0.0273	Ccl7,CTSC,LYZ
Meta_70 - 2021-08-17 12:18 PM		ADCYAP1		other						0.0277	ANGPT1,IL23A
Meta_70 - 2021-08-17 12:18 PM		NFkB (complex)		complex						0.0287	Ccl7,Cd24a,IL23A,TLR2
Meta_70 - 2021-08-17 12:18 PM		SAMSN1		other						0.0296	Ccl7,IL23A
Meta_70 - 2021-08-17 12:18 PM		SHH		peptidase						0.0296	ANGPT1,PDGFRA
Meta_70 - 2021-08-17 12:18 PM		AMBRA1		other						0.0301	ANGPT1
Meta_70 - 2021-08-17 12:18 PM		ANKRD17		other						0.0301	Ccl7
Meta_70 - 2021-08-17 12:18 PM		BCL6B		transcription regulator						0.0301	S100A4
Meta_70 - 2021-08-17 12:18 PM		CSF2RA		transmembrane receptor						0.0301	JUN
Meta_70 - 2021-08-17 12:18 PM		DPY30		other						0.0301	ID3
Meta_70 - 2021-08-17 12:18 PM		EPHB1		kinase						0.0301	JUN
Meta_70 - 2021-08-17 12:18 PM		HIF3A		transcription regulator						0.0301	PDGFRB
Meta_70 - 2021-08-17 12:18 PM		Igkv1-117		other						0.0301	JUN
Meta_70 - 2021-08-17 12:18 PM		LAMTOR5		other						0.0301	S100A4
Meta_70 - 2021-08-17 12:18 PM		MST1R		kinase						0.0301	JUN
Meta_70 - 2021-08-17 12:18 PM		PARP14		enzyme						0.0301	ID3
Meta_70 - 2021-08-17 12:18 PM		PTCSC3		other						0.0301	S100A4
Meta_70 - 2021-08-17 12:18 PM		SLC6A1		transporter						0.0301	IL23A
Meta_70 - 2021-08-17 12:18 PM		TRAF7		enzyme						0.0301	JUN
Meta_70 - 2021-08-17 12:18 PM		mir-143		microrna						0.0301	PDGFRA
Meta_70 - 2021-08-17 12:18 PM		ATG7		enzyme						0.0302	MSR1,S100A4
Meta_70 - 2021-08-17 12:18 PM		PRKCA		kinase						0.0302	ID3,JUN
Meta_70 - 2021-08-17 12:18 PM		DSCAML1		other						0.0308	ID3,PDGFA
Meta_70 - 2021-08-17 12:18 PM		MYF6		transcription regulator						0.0315	DCN,PDGFA
Meta_70 - 2021-08-17 12:18 PM		PIK3CG		kinase						0.0321	EPHB6,TLR2
Meta_70 - 2021-08-17 12:18 PM		PTPRR		phosphatase						0.0321	COL6A1,JUN
Meta_70 - 2021-08-17 12:18 PM		TCF12		transcription regulator						0.0321	ID3,JUN
Meta_70 - 2021-08-17 12:18 PM		Hbb-b1		transporter						0.0327	Ccl7,TLR2
Meta_70 - 2021-08-17 12:18 PM		APLNR		g-protein coupled receptor						0.033	ANGPT1
Meta_70 - 2021-08-17 12:18 PM		CARD14		other						0.033	IL23A
Meta_70 - 2021-08-17 12:18 PM		COPA		transporter						0.033	IL23A
Meta_70 - 2021-08-17 12:18 PM		EFNB2		kinase						0.033	ANGPT1
Meta_70 - 2021-08-17 12:18 PM		FURIN		peptidase						0.033	EGLN1
Meta_70 - 2021-08-17 12:18 PM		IL2RB		transmembrane receptor						0.033	JUN
Meta_70 - 2021-08-17 12:18 PM		LCP2		other						0.033	ID3
Meta_70 - 2021-08-17 12:18 PM		N4BP1		other						0.033	JUN
Meta_70 - 2021-08-17 12:18 PM		Ncoa6		transcription regulator						0.033	TGFA
Meta_70 - 2021-08-17 12:18 PM		POLR3G		enzyme						0.033	S100A4
Meta_70 - 2021-08-17 12:18 PM		Pkg		group						0.033	JUN
Meta_70 - 2021-08-17 12:18 PM		SP7		transcription regulator						0.033	IBSP
Meta_70 - 2021-08-17 12:18 PM		USP4		peptidase						0.033	ID3
Meta_70 - 2021-08-17 12:18 PM		ZBTB33		transcription regulator						0.033	S100A4
Meta_70 - 2021-08-17 12:18 PM		mir-199		microrna						0.033	EGLN1
Meta_70 - 2021-08-17 12:18 PM		AKT1		kinase						0.0334	PDGFRA,PDGFRB
Meta_70 - 2021-08-17 12:18 PM		Ifnar		group						0.0334	Ccl7,TLR2
Meta_70 - 2021-08-17 12:18 PM		TAF4		transcription regulator						0.0334	DCN,PDGFA
Meta_70 - 2021-08-17 12:18 PM		DSCAM		other						0.034	ID3,PDGFA
Meta_70 - 2021-08-17 12:18 PM		FOLR1		transporter						0.0347	LYZ,S100A4
Meta_70 - 2021-08-17 12:18 PM		SP1		transcription regulator						0.035	JUN,PDGFA,SLC6A2,TLR2
Meta_70 - 2021-08-17 12:18 PM		IL2		cytokine						0.0353	JUN,TGFBR3,TLR2,WLS
Meta_70 - 2021-08-17 12:18 PM		Irgm1		other						0.0354	ID3,TLR2
Meta_70 - 2021-08-17 12:18 PM		KLF4		transcription regulator						0.0357	ANGPT1,PDGFRA,WLS
Meta_70 - 2021-08-17 12:18 PM		ACTN4		transcription regulator						0.036	DCN
Meta_70 - 2021-08-17 12:18 PM		DUSP14		phosphatase						0.036	Ccl7
Meta_70 - 2021-08-17 12:18 PM		EREG		growth factor						0.036	TGFA
Meta_70 - 2021-08-17 12:18 PM		GCGR		g-protein coupled receptor						0.036	SLC6A2
Meta_70 - 2021-08-17 12:18 PM		LAMA2		other						0.036	PLVAP
Meta_70 - 2021-08-17 12:18 PM		MAP3K5		kinase						0.036	Ccl7
Meta_70 - 2021-08-17 12:18 PM		NELFB		other						0.036	COL6A1
Meta_70 - 2021-08-17 12:18 PM		PRKRA		other						0.036	IL23A
Meta_70 - 2021-08-17 12:18 PM		RPS6KA4		kinase						0.036	JUN
Meta_70 - 2021-08-17 12:18 PM		SMURF2		enzyme						0.036	JUN
Meta_70 - 2021-08-17 12:18 PM		ZIC3		transcription regulator						0.036	PDGFRA
Meta_70 - 2021-08-17 12:18 PM		INHA		growth factor						0.036	COL6A1,IL1R1
Meta_70 - 2021-08-17 12:18 PM		THRB		ligand-dependent nuclear receptor						0.0361	DCN,JUN,TLR2
Meta_70 - 2021-08-17 12:18 PM		AR		ligand-dependent nuclear receptor		1.446		0.053	1.33	0.0362	Cd24a,IL1R1,PDGFA,PDGFRA,SOD3
Meta_70 - 2021-08-17 12:18 PM		HAVCR1		other						0.0367	JUN,LBP
Meta_70 - 2021-08-17 12:18 PM		ESR1		ligand-dependent nuclear receptor		-0.32		0.023	-0.364	0.0369	Clec2d (includes others),CP,JUN,LBP,TGFA
Meta_70 - 2021-08-17 12:18 PM		PTGER2		g-protein coupled receptor						0.0374	CLEC6A,IL23A
Meta_70 - 2021-08-17 12:18 PM		FOXO4		transcription regulator						0.0387	ANGPT1,IL1R1
Meta_70 - 2021-08-17 12:18 PM		MYB		transcription regulator						0.0387	JUN,PPP3CA
Meta_70 - 2021-08-17 12:18 PM		AK1		kinase						0.0389	ENO3
Meta_70 - 2021-08-17 12:18 PM		BMP15		growth factor						0.0389	ID3
Meta_70 - 2021-08-17 12:18 PM		CSF2RB		transmembrane receptor						0.0389	JUN
Meta_70 - 2021-08-17 12:18 PM		GAB1		other						0.0389	ANGPT1
Meta_70 - 2021-08-17 12:18 PM		GFI1B		transcription regulator						0.0389	TGFBR3
Meta_70 - 2021-08-17 12:18 PM		LRAT		enzyme						0.0389	TGFA
Meta_70 - 2021-08-17 12:18 PM		ODC1		enzyme						0.0389	TLR2
Meta_70 - 2021-08-17 12:18 PM		STIM1		ion channel						0.0389	PRDX1
Meta_70 - 2021-08-17 12:18 PM		TACR1		g-protein coupled receptor						0.0389	IL23A
Meta_70 - 2021-08-17 12:18 PM		JUNB		transcription regulator						0.0394	Ccl7,IBSP
Meta_70 - 2021-08-17 12:18 PM		PARP1		enzyme						0.0394	JUN,TGFA
Meta_70 - 2021-08-17 12:18 PM		CLOCK		transcription regulator						0.0417	MOXD1,PDGFRB,RGS5
Meta_70 - 2021-08-17 12:18 PM		AQP1		transporter						0.0418	TGFA
Meta_70 - 2021-08-17 12:18 PM		COL6A1	0.615	other						0.0418	ENO3
Meta_70 - 2021-08-17 12:18 PM		EPCAM		other						0.0418	JUN
Meta_70 - 2021-08-17 12:18 PM		FBXO32		enzyme						0.0418	IL1R1
Meta_70 - 2021-08-17 12:18 PM		Hif1		complex						0.0418	CP
Meta_70 - 2021-08-17 12:18 PM		IL1RL2		transmembrane receptor						0.0418	IL23A
Meta_70 - 2021-08-17 12:18 PM		IL24		cytokine						0.0418	IL23A
Meta_70 - 2021-08-17 12:18 PM		MEG3		other						0.0418	JUN
Meta_70 - 2021-08-17 12:18 PM		MLX		transcription regulator						0.0418	Ccl7
Meta_70 - 2021-08-17 12:18 PM		NAA10		enzyme						0.0418	TGFBR3
Meta_70 - 2021-08-17 12:18 PM		NOX1		enzyme						0.0418	TGFA
Meta_70 - 2021-08-17 12:18 PM		PMP22		other						0.0418	JUN
Meta_70 - 2021-08-17 12:18 PM		PTPRE		phosphatase						0.0418	Ccl7
Meta_70 - 2021-08-17 12:18 PM		Retnla		other						0.0418	IL23A
Meta_70 - 2021-08-17 12:18 PM		SRSF3		other						0.0418	JUN
Meta_70 - 2021-08-17 12:18 PM		YY1		transcription regulator						0.0429	ID3,PDGFA,PDGFRA
Meta_70 - 2021-08-17 12:18 PM		ATF3		transcription regulator						0.043	JUN,TLR2
Meta_70 - 2021-08-17 12:18 PM		PTEN		phosphatase		0.849		-0.018	0.884	0.044	ANGPT1,IL23A,JUN,PDGFRB
Meta_70 - 2021-08-17 12:18 PM		Esrra		transcription regulator						0.0444	ENO3,IBSP
Meta_70 - 2021-08-17 12:18 PM		RNA polymerase II		complex						0.0446	FOXC2,JUN,SLC6A2
Meta_70 - 2021-08-17 12:18 PM		COX4I1		enzyme						0.0447	PPP3CA
Meta_70 - 2021-08-17 12:18 PM		F3		transmembrane receptor						0.0447	ANGPT1
Meta_70 - 2021-08-17 12:18 PM		FAT1		other						0.0447	JUN
Meta_70 - 2021-08-17 12:18 PM		HEXIM1		transcription regulator						0.0447	ANGPT1
Meta_70 - 2021-08-17 12:18 PM		MAP2K2		kinase						0.0447	PDGFRA
Meta_70 - 2021-08-17 12:18 PM		PAX3		transcription regulator						0.0447	ID3
Meta_70 - 2021-08-17 12:18 PM		PDCD4		other						0.0447	JUN
Meta_70 - 2021-08-17 12:18 PM		PNN		other						0.0447	JUN
Meta_70 - 2021-08-17 12:18 PM		RGS1		enzyme						0.0447	IL23A
Meta_70 - 2021-08-17 12:18 PM		SDHB		enzyme						0.0447	SOD3
Meta_70 - 2021-08-17 12:18 PM		THRAP3		transcription regulator						0.0447	Cd24a
Meta_70 - 2021-08-17 12:18 PM		MTOR		kinase						0.0454	ERCC1,IL1R1,IL23A
Meta_70 - 2021-08-17 12:18 PM		NR5A2		ligand-dependent nuclear receptor						0.0459	Ccl7,JUN
Meta_70 - 2021-08-17 12:18 PM		TRIM24		transcription regulator						0.0459	IL1R1,TLR2
Meta_70 - 2021-08-17 12:18 PM		HDAC4		transcription regulator						0.0473	JUN,PPP3CA
Meta_70 - 2021-08-17 12:18 PM		BAG1		other						0.0477	JUN
Meta_70 - 2021-08-17 12:18 PM		CD22		transmembrane receptor						0.0477	Cd24a
Meta_70 - 2021-08-17 12:18 PM		GPR132		g-protein coupled receptor						0.0477	IL23A
Meta_70 - 2021-08-17 12:18 PM		IL17C		cytokine						0.0477	IL23A
Meta_70 - 2021-08-17 12:18 PM		LAMA5		other						0.0477	Ccl7
Meta_70 - 2021-08-17 12:18 PM		MAPK12		kinase						0.0477	JUN
Meta_70 - 2021-08-17 12:18 PM		NFIA		transcription regulator						0.0477	EFNB1
Meta_70 - 2021-08-17 12:18 PM		mir-145		microrna						0.0477	PDGFRA
Meta_70 - 2021-08-17 12:18 PM		APC		enzyme						0.0481	ID3,JUN
Meta_70 - 2021-08-17 12:18 PM		KDM5B		transcription regulator						0.0488	EHD1,NDC80
Meta_70 - 2021-08-17 12:18 PM		SPP1		cytokine						0.0496	ANGPT1,JUN
