# Supplementary material for: Reduction of Metastasis via Epigenetic Modulation in a Murine Model of Metastatic Triple Negative Breast Cancer (TNBC)
Source: Cancers (Basel). 2022 Mar 30;14(7):1753. doi: 10.3390/cancers14071753 (PMC8996906; doi:10.3390/cancers14071753)
Supplement: Supplementary file 1 [file cancers-14-01753-s001.zip › FileS7_4SCvsControl_allDEGs.xlsx]

## Sheet: WF1 Exp1-2
	baseMean	log2FoldChange	lfcSE	stat	pvalue	padj
ENSMUSG00000000001	2820.19	0.00902217	0.112134	0.080459	0.935872	0.988121
ENSMUSG00000000028	368.212	0.139062	0.119443	1.16425	0.244321	0.68931
ENSMUSG00000000031	10486.9	-1.27428	0.4513	-2.82358	0.0047491	0.129865
ENSMUSG00000000037	2.33776	0.805695	1.13376	0.710639	0.477308	NA
ENSMUSG00000000049	2.66299	-1.64771	1.13157	-1.45612	0.145358	NA
ENSMUSG00000000056	883.983	-0.194261	0.10124	-1.91882	0.0550073	0.406298
ENSMUSG00000000058	410.071	0.183474	0.192951	0.950881	0.341665	0.765381
ENSMUSG00000000078	1875.4	0.0644258	0.119339	0.539856	0.589297	0.885062
ENSMUSG00000000085	1134.66	-0.0667633	0.109667	-0.60878	0.54267	0.867932
ENSMUSG00000000088	738.904	0.119007	0.121601	0.978673	0.327742	0.752785
ENSMUSG00000000093	143.465	0.559973	0.215464	2.59892	0.00935169	0.183881
ENSMUSG00000000094	6.35191	-0.140605	0.773451	-0.181789	0.855749	NA
ENSMUSG00000000120	181.016	0.167507	0.731137	0.229105	0.818787	0.959495
ENSMUSG00000000126	621.33	-0.36002	0.151455	-2.37708	0.0174502	0.247788
ENSMUSG00000000127	210.81	0.017499	0.13855	0.126301	0.899494	0.97864
ENSMUSG00000000131	1686.54	-0.191635	0.0787227	-2.43431	0.0149202	0.227562
ENSMUSG00000000134	1512.89	-0.0700073	0.0832338	-0.841092	0.400296	0.79882
ENSMUSG00000000142	36.1643	0.219121	0.31593	0.693574	0.48795	0.842649
ENSMUSG00000000148	477.976	-0.177576	0.1004	-1.76868	0.0769471	0.458608
ENSMUSG00000000149	1684.53	-0.0629817	0.0913221	-0.689666	0.490404	0.84428
ENSMUSG00000000154	115.195	-0.261369	0.21494	-1.21601	0.223982	0.675927
ENSMUSG00000000157	6.18613	0.0923418	0.696672	0.132547	0.894552	NA
ENSMUSG00000000159	1.39002	-0.904232	1.37101	-0.659538	0.50955	NA
ENSMUSG00000000167	25.856	0.307037	0.361537	0.849254	0.39574	0.796131
ENSMUSG00000000168	882.542	-0.138245	0.0882271	-1.56693	0.117132	0.538254
ENSMUSG00000000171	1704.41	0.142929	0.0798387	1.79022	0.073419	0.454006
ENSMUSG00000000183	1.07525	-1.0228	1.33395	-0.766747	0.443232	NA
ENSMUSG00000000184	803.357	-0.392843	0.184866	-2.12502	0.0335853	0.336979
ENSMUSG00000000194	1042.09	-0.00639444	0.0820701	-0.0779143	0.937896	0.98837
ENSMUSG00000000197	0.602704	-2.09084	2.48196	-0.842417	0.399555	NA
ENSMUSG00000000202	5.8391	-0.748644	0.702281	-1.06602	0.286416	NA
ENSMUSG00000000204	576.416	0.551585	0.191319	2.88306	0.00393833	0.11955
ENSMUSG00000000216	0.35964	-0.174059	3.15784	-0.0551195	0.956043	NA
ENSMUSG00000000223	35.2247	0.478364	0.28097	1.70254	0.0886536	0.482945
ENSMUSG00000000244	21.013	0.851584	0.347832	2.44827	0.0143545	NA
ENSMUSG00000000247	2.03671	-1.0644	1.18331	-0.899511	0.368381	NA
ENSMUSG00000000248	0.331806	-1.81369	3.14374	-0.576922	0.563992	NA
ENSMUSG00000000253	95.2106	0.182936	0.253134	0.722685	0.469874	0.835542
ENSMUSG00000000263	0.51809	1.40643	2.53188	0.555489	0.57856	NA
ENSMUSG00000000266	146.255	-0.203769	0.21583	-0.944116	0.34511	0.768791
ENSMUSG00000000275	2536.72	-0.0670408	0.0908399	-0.73801	0.460508	0.83204
ENSMUSG00000000276	156.658	0.202462	0.156924	1.29019	0.196984	0.650391
ENSMUSG00000000278	1649.18	0.121925	0.0858819	1.41968	0.1557	0.602318
ENSMUSG00000000282	1149.17	-0.108912	0.11504	-0.946726	0.343779	0.767491
ENSMUSG00000000290	2370.1	0.101217	0.168935	0.599151	0.549073	0.870214
ENSMUSG00000000295	537.339	-0.0621342	0.122632	-0.506673	0.612384	0.891723
ENSMUSG00000000296	180.473	-0.0953057	0.163731	-0.582086	0.560509	0.875352
ENSMUSG00000000301	80.5514	-0.176296	0.237471	-0.74239	0.457851	0.831589
ENSMUSG00000000303	3066.26	-0.310747	0.3197	-0.971997	0.331052	0.756369
ENSMUSG00000000308	1.38475	-0.817873	1.57949	-0.517807	0.604593	NA
ENSMUSG00000000317	276.462	0.0714202	0.124993	0.571395	0.567732	0.878163
ENSMUSG00000000318	61.7798	0.0419379	0.244496	0.171528	0.863809	0.969861
ENSMUSG00000000320	9.30821	0.779923	0.470337	1.65822	0.097273	NA
ENSMUSG00000000325	386.887	-0.387558	0.111577	-3.47346	0.000513786	0.0359844
ENSMUSG00000000326	1577.56	0.0715276	0.0879014	0.813725	0.415802	0.805348
ENSMUSG00000000339	629.714	-0.0126567	0.0883359	-0.143279	0.88607	0.975191
ENSMUSG00000000340	293.875	-0.0442478	0.129613	-0.341383	0.732815	0.935207
ENSMUSG00000000346	2253.55	-0.0202926	0.0897233	-0.226168	0.82107	0.960281
ENSMUSG00000000355	400.297	0.296582	0.179437	1.65285	0.0983621	0.504884
ENSMUSG00000000359	46.7954	0.0625091	0.259519	0.240865	0.80966	0.956551
ENSMUSG00000000374	791.538	-0.173784	0.120324	-1.4443	0.148655	0.595222
ENSMUSG00000000378	1089.84	-0.174827	0.0726988	-2.40481	0.0161807	0.237385
ENSMUSG00000000384	1047.98	0.0150546	0.100775	0.149388	0.881248	0.974362
ENSMUSG00000000385	10.6901	0.490611	0.686943	0.714195	0.475107	NA
ENSMUSG00000000386	225.125	-0.0752077	0.199044	-0.377845	0.705546	0.928601
ENSMUSG00000000392	158.53	-0.0761407	0.209293	-0.363799	0.716008	0.932014
ENSMUSG00000000399	727.895	0.135843	0.0825559	1.64547	0.0998723	0.508494
ENSMUSG00000000409	156.084	0.0966214	0.252814	0.382184	0.702325	0.92716
ENSMUSG00000000411	0.820399	2.34605	2.33072	1.00658	0.314138	NA
ENSMUSG00000000416	14.8732	-0.0501221	0.382382	-0.131079	0.895713	NA
ENSMUSG00000000420	3547.79	-0.128539	0.0905608	-1.41937	0.155792	0.602318
ENSMUSG00000000439	300.555	-0.0914776	0.123123	-0.742981	0.457493	0.831589
ENSMUSG00000000440	14.4647	-0.028584	0.506788	-0.0564022	0.955021	NA
ENSMUSG00000000441	539.999	-0.217375	0.169496	-1.28248	0.199675	0.652317
ENSMUSG00000000486	226.784	0.137054	0.165156	0.829846	0.406626	0.800245
ENSMUSG00000000489	1240.53	-0.180417	0.114759	-1.57213	0.11592	0.534663
ENSMUSG00000000530	451.991	0.223451	0.10077	2.21745	0.0265927	0.301555
ENSMUSG00000000531	242.103	-0.136982	0.147849	-0.926494	0.354189	0.775924
ENSMUSG00000000532	580.182	-0.169569	0.098147	-1.7277	0.0840414	0.471447
ENSMUSG00000000538	918.628	-0.204773	0.0946231	-2.16409	0.0304573	0.322301
ENSMUSG00000000544	2884.06	-0.385881	0.121565	-3.17427	0.00150215	0.0694193
ENSMUSG00000000552	478.65	0.0478983	0.136644	0.350533	0.725939	0.932995
ENSMUSG00000000555	1811.3	-0.0148129	0.118839	-0.124647	0.900803	0.979047
ENSMUSG00000000561	797.606	0.209463	0.177925	1.17725	0.239096	0.686725
ENSMUSG00000000562	44.7074	0.113959	0.233813	0.487392	0.62598	0.896785
ENSMUSG00000000563	2999.26	0.0693042	0.0951352	0.728481	0.466319	0.833293
ENSMUSG00000000567	772.067	-0.47818	0.120555	-3.96648	7.29406e-05	0.0123323
ENSMUSG00000000568	3131.18	0.252014	0.102773	2.45213	0.0142014	0.223992
ENSMUSG00000000579	136.942	-0.148235	0.214295	-0.691733	0.489105	0.843259
ENSMUSG00000000581	710.739	0.115494	0.16057	0.719275	0.471972	0.836471
ENSMUSG00000000594	2526.24	-0.0187955	0.107529	-0.174795	0.86124	0.968969
ENSMUSG00000000600	507.109	0.0245295	0.144766	0.169442	0.865449	0.970034
ENSMUSG00000000605	658.979	-0.0696465	0.115958	-0.60062	0.548093	0.870214
ENSMUSG00000000627	46.7673	-0.144829	0.258922	-0.559354	0.57592	0.880617
ENSMUSG00000000628	2404.34	-0.0617721	0.110219	-0.560447	0.575174	0.880448
ENSMUSG00000000631	2030.53	-0.0534929	0.076601	-0.698332	0.48497	0.842242
ENSMUSG00000000632	0.960203	1.75488	1.9123	0.917677	0.358788	NA
ENSMUSG00000000673	21.7954	0.29996	0.329404	0.910613	0.362499	0.779418
ENSMUSG00000000682	859.84	0.304516	0.125157	2.43307	0.0149715	0.228093
ENSMUSG00000000686	12.1831	-0.0658529	0.45038	-0.146216	0.883751	NA
ENSMUSG00000000690	20.8885	0.634929	0.359373	1.76677	0.0772671	NA
ENSMUSG00000000693	2786.25	-0.146648	0.152731	-0.960169	0.33697	0.760873
ENSMUSG00000000706	5.10527	-0.959187	0.835533	-1.14799	0.250971	NA
ENSMUSG00000000708	582.097	-0.0913269	0.154273	-0.591982	0.553863	0.872258
ENSMUSG00000000711	1667.68	-0.252161	0.0826459	-3.0511	0.00228008	0.0895498
ENSMUSG00000000724	0.681307	2.54516	1.99161	1.27794	0.201272	NA
ENSMUSG00000000730	5.42548	0.784025	0.665565	1.17798	0.238803	NA
ENSMUSG00000000731	4.85345	-0.67013	0.860421	-0.77884	0.436074	NA
ENSMUSG00000000732	212.182	0.14124	0.156485	0.902578	0.36675	0.780955
ENSMUSG00000000738	1701.6	-0.0708748	0.0944753	-0.750194	0.453138	0.828697
ENSMUSG00000000739	11.881	0.108641	0.512525	0.211972	0.832129	NA
ENSMUSG00000000740	18283	0.0267286	0.125741	0.212569	0.831663	0.961167
ENSMUSG00000000743	1753.65	-0.141367	0.0808528	-1.74845	0.0803862	0.46576
ENSMUSG00000000751	1476.78	0.169202	0.0792133	2.13603	0.0326769	0.333358
ENSMUSG00000000753	890.36	-0.258396	0.203325	-1.27085	0.203782	0.655681
ENSMUSG00000000759	895.256	-0.00568373	0.0778136	-0.0730428	0.941772	0.988971
ENSMUSG00000000776	583.869	-0.0257675	0.083426	-0.308866	0.757423	0.942909
ENSMUSG00000000782	259.644	0.0326388	0.136787	0.238611	0.811407	0.957066
ENSMUSG00000000787	3888.69	0.138056	0.149476	0.923595	0.355697	0.776543
ENSMUSG00000000791	534.055	-0.221566	0.386838	-0.572761	0.566807	0.877898
ENSMUSG00000000792	8.20969	-0.40769	0.514673	-0.792135	0.428282	NA
ENSMUSG00000000794	12.2831	0.0615461	0.591451	0.10406	0.917122	NA
ENSMUSG00000000804	744.075	-0.0453296	0.0884643	-0.512405	0.608368	0.891304
ENSMUSG00000000805	27.6628	0.226592	0.417936	0.542169	0.587702	0.884693
ENSMUSG00000000811	150.874	-0.224667	0.139801	-1.60704	0.108045	0.521972
ENSMUSG00000000817	13.1945	-0.570412	0.586294	-0.972912	0.330597	NA
ENSMUSG00000000823	1165.67	-0.0791727	0.132483	-0.597606	0.550103	0.870713
ENSMUSG00000000826	2668.17	-0.139799	0.0726164	-1.92517	0.0542079	0.405497
ENSMUSG00000000827	1671.6	0.033787	0.0676194	0.499665	0.617311	0.894819
ENSMUSG00000000838	876.227	0.15261	0.190625	0.800576	0.423377	0.810728
ENSMUSG00000000861	234.707	-0.312934	0.20177	-1.55094	0.120915	0.546303
ENSMUSG00000000869	50.0415	-0.378745	0.231749	-1.63429	0.102198	0.512595
ENSMUSG00000000876	229.184	0.0331356	0.118524	0.279569	0.779809	0.950012
ENSMUSG00000000881	606.401	-0.106986	0.0883143	-1.21142	0.225734	0.677202
ENSMUSG00000000884	131.639	-0.316233	0.171459	-1.84436	0.0651304	0.433302
ENSMUSG00000000901	1103.02	-0.020013	0.103699	-0.192991	0.846966	0.965495
ENSMUSG00000000902	1891.85	-0.126625	0.0920241	-1.376	0.168822	0.618126
ENSMUSG00000000903	2.27946	-1.06505	1.03456	-1.02947	0.303258	NA
ENSMUSG00000000915	453.533	-0.15069	0.128693	-1.17093	0.241627	0.687361
ENSMUSG00000000916	326.815	0.0151337	0.11744	0.128863	0.897466	0.97864
ENSMUSG00000000934	131.872	-0.0708957	0.13827	-0.512735	0.608137	0.891304
ENSMUSG00000000938	618.71	-0.0882094	0.0981926	-0.89833	0.36901	0.78248
ENSMUSG00000000942	38.8367	0.448696	0.352844	1.27165	0.203496	0.655681
ENSMUSG00000000948	5.5939	-0.0834654	0.654964	-0.127435	0.898596	NA
ENSMUSG00000000957	10407.3	0.140315	0.0740924	1.89378	0.0582538	0.41485
ENSMUSG00000000958	432.007	0.344632	0.133193	2.58747	0.00966844	0.185568
ENSMUSG00000000959	1137.68	-0.0792145	0.0831073	-0.95316	0.340509	0.763705
ENSMUSG00000000976	701.039	-0.160406	0.114874	-1.39637	0.162604	0.610435
ENSMUSG00000000982	71.9067	0.423595	0.315758	1.34152	0.179752	0.629807
ENSMUSG00000000983	1.57799	0.301366	1.25714	0.239723	0.810545	NA
ENSMUSG00000001016	1878.8	-0.0376503	0.0842176	-0.44706	0.654832	0.907795
ENSMUSG00000001017	2510.74	-0.0605508	0.0671224	-0.902095	0.367007	0.780955
ENSMUSG00000001018	910.067	0.0206073	0.110036	0.187278	0.851443	0.966311
ENSMUSG00000001020	187.438	1.20244	0.287074	4.18862	2.80657e-05	0.00643955
ENSMUSG00000001021	3.84417	-0.70098	0.770055	-0.910299	0.362665	NA
ENSMUSG00000001023	0.765405	0.98124	2.04208	0.480511	0.630864	NA
ENSMUSG00000001025	21385.5	-0.134904	0.0814334	-1.65661	0.0975973	0.503194
ENSMUSG00000001027	80.8214	0.369713	0.383511	0.964021	0.335036	0.759269
ENSMUSG00000001029	168.166	0.421971	0.125061	3.37411	0.000740549	0.046668
ENSMUSG00000001034	931.834	-0.115844	0.138599	-0.835824	0.403254	0.799898
ENSMUSG00000001036	2938.94	0.149608	0.11186	1.33746	0.181073	0.630584
ENSMUSG00000001039	251.326	-0.200482	0.161173	-1.2439	0.213538	0.665186
ENSMUSG00000001052	1884.16	-0.077687	0.0847606	-0.916546	0.35938	0.777613
ENSMUSG00000001053	601.756	-0.0907872	0.10251	-0.885642	0.37581	0.785739
ENSMUSG00000001054	538.069	-0.103863	0.108165	-0.960224	0.336942	0.760873
ENSMUSG00000001056	1225.81	0.0597335	0.108418	0.550955	0.581664	0.881961
ENSMUSG00000001062	672.097	-0.166054	0.100571	-1.6511	0.0987177	0.505213
ENSMUSG00000001065	333.109	-0.441842	0.110245	-4.00784	6.12777e-05	0.0110332
ENSMUSG00000001076	1.7563	0.127021	1.43497	0.0885188	0.929464	NA
ENSMUSG00000001082	1508.24	0.0833493	0.0961274	0.867072	0.385903	0.790733
ENSMUSG00000001089	1100.55	-0.0687303	0.107916	-0.636888	0.524198	0.860057
ENSMUSG00000001095	15.7739	-0.312886	0.474772	-0.659024	0.50988	NA
ENSMUSG00000001098	949.179	-0.237221	0.154609	-1.53433	0.124949	0.55594
ENSMUSG00000001100	1442.24	-0.0120567	0.0873045	-0.1381	0.890162	0.976879
ENSMUSG00000001103	0.1598	0.410174	3.16075	0.129771	0.896747	NA
ENSMUSG00000001105	511.001	0.00517758	0.0984352	0.0525988	0.958052	0.990309
ENSMUSG00000001119	6537.07	0.615295	0.114882	5.35589	8.51373e-08	0.000121737
ENSMUSG00000001120	329.263	-0.151863	0.127958	-1.18682	0.2353	0.684521
ENSMUSG00000001123	2181.13	0.0573052	0.0934632	0.613131	0.53979	0.866355
ENSMUSG00000001127	1480.78	0.0617965	0.096936	0.637498	0.523801	0.859812
ENSMUSG00000001128	1165.84	0.267416	0.172401	1.55113	0.120871	0.546303
ENSMUSG00000001131	1150.39	0.00960116	0.129551	0.074111	0.940922	0.988971
ENSMUSG00000001134	74.6553	0.237577	0.235619	1.00831	0.313306	0.743262
ENSMUSG00000001138	715.69	-0.0680566	0.0961741	-0.70764	0.479169	0.837941
ENSMUSG00000001143	776.314	-0.0665423	0.102801	-0.64729	0.517444	0.856579
ENSMUSG00000001150	979.752	-0.104225	0.0867395	-1.20159	0.229523	0.681345
ENSMUSG00000001151	905.52	-0.0915778	0.105979	-0.86411	0.387528	0.791867
ENSMUSG00000001155	1.73716	0.0599681	1.43046	0.0419223	0.966561	NA
ENSMUSG00000001156	479.73	-0.0957006	0.113561	-0.842726	0.399382	0.798226
ENSMUSG00000001157	386.573	0.00321094	0.122554	0.0262002	0.979098	0.996069
ENSMUSG00000001158	555.712	0.0505724	0.125024	0.404503	0.685843	0.921455
ENSMUSG00000001166	92.5154	0.118992	0.198962	0.598062	0.549799	0.870635
ENSMUSG00000001168	28.8165	-0.430788	0.339017	-1.2707	0.203836	0.655681
ENSMUSG00000001173	577.701	-0.150783	0.104175	-1.44741	0.147783	0.595222
ENSMUSG00000001175	6505.14	0.0509664	0.106824	0.477107	0.633286	0.900191
ENSMUSG00000001211	2177.14	-0.134915	0.0779791	-1.73015	0.0836044	0.470984
ENSMUSG00000001227	315.854	0.102795	0.163874	0.627283	0.530474	0.863375
ENSMUSG00000001228	1553.28	0.215392	0.0993751	2.16746	0.0301996	0.321325
ENSMUSG00000001229	1242.3	-0.165643	0.141343	-1.17193	0.241227	0.687361
ENSMUSG00000001240	241.04	0.362896	0.120388	3.01439	0.00257494	0.0958862
ENSMUSG00000001247	517.672	-0.483329	0.109284	-4.42269	9.74802e-06	0.00346179
ENSMUSG00000001248	2214.33	-0.052211	0.0827782	-0.630733	0.528215	0.863007
ENSMUSG00000001249	31.6747	0.404854	0.280404	1.44382	0.148789	0.595499
ENSMUSG00000001270	646.818	-0.0263769	0.194165	-0.135848	0.891942	0.977639
ENSMUSG00000001280	1509.13	0.0282339	0.11513	0.245234	0.806275	0.955848
ENSMUSG00000001281	141.345	0.109497	0.166299	0.658431	0.510261	0.852827
ENSMUSG00000001285	508.947	0.0509485	0.0951065	0.5357	0.592166	0.886204
ENSMUSG00000001288	1904.77	-0.201191	0.074803	-2.68961	0.00715366	0.160483
ENSMUSG00000001289	2192.61	0.0165816	0.107946	0.15361	0.877917	0.973844
ENSMUSG00000001300	1009.06	-0.170887	0.147924	-1.15524	0.247993	0.692901
ENSMUSG00000001305	718.802	0.0122921	0.0977586	0.12574	0.899938	0.978721
ENSMUSG00000001313	117.204	-0.0386165	0.150376	-0.256799	0.797334	0.955092
ENSMUSG00000001323	187.548	-0.0771907	0.117599	-0.656389	0.511574	0.853748
ENSMUSG00000001333	22.7929	-0.0225098	0.421359	-0.0534219	0.957396	0.990287
ENSMUSG00000001334	67.8756	0.0402905	0.310692	0.12968	0.89682	0.97864
ENSMUSG00000001348	1459.78	0.273341	0.473229	0.577608	0.563529	0.876362
ENSMUSG00000001349	49.3314	-0.742098	0.425079	-1.74579	0.0808476	0.467098
ENSMUSG00000001366	277.971	-0.115525	0.115147	-1.00329	0.315723	0.74478
ENSMUSG00000001376	538.981	0.161266	0.133171	1.21097	0.225906	0.677202
ENSMUSG00000001380	1137.16	-0.0358081	0.0744282	-0.48111	0.630438	0.89839
ENSMUSG00000001383	1363.66	0.12165	0.107845	1.12801	0.259317	0.701261
ENSMUSG00000001403	879.089	0.0994136	0.140597	0.707081	0.479516	0.838125
ENSMUSG00000001415	2300.3	-0.0526052	0.0965287	-0.544969	0.585775	0.884693
ENSMUSG00000001416	6380.06	0.0763433	0.0689606	1.10706	0.268269	0.707827
ENSMUSG00000001418	2278.3	0.0150862	0.0716322	0.210606	0.833195	0.961167
ENSMUSG00000001419	1856.43	-0.0505865	0.130644	-0.387208	0.698602	0.925194
ENSMUSG00000001420	357.801	-0.367808	0.133199	-2.76134	0.00575647	0.143423
ENSMUSG00000001424	4275.06	0.0146813	0.100122	0.146634	0.883421	0.974362
ENSMUSG00000001435	8208.4	0.0343175	0.17833	0.192438	0.847399	0.965495
ENSMUSG00000001436	439.935	-0.00502611	0.0948789	-0.052974	0.957753	0.990309
ENSMUSG00000001440	6646.82	-0.0242915	0.0865368	-0.280707	0.778935	0.949772
ENSMUSG00000001441	2020.74	-0.0350307	0.0773426	-0.452928	0.6506	0.905797
ENSMUSG00000001444	11.6883	0.433546	0.727707	0.59577	0.551329	NA
ENSMUSG00000001445	629.665	-0.0398885	0.0889155	-0.448612	0.653712	0.907556
ENSMUSG00000001467	685.139	-0.0319497	0.110382	-0.289447	0.77224	0.947993
ENSMUSG00000001472	6004.55	-0.180509	0.0854553	-2.11232	0.034659	0.342734
ENSMUSG00000001473	2327.59	-0.0258007	0.115044	-0.224268	0.822548	0.96049
ENSMUSG00000001482	717.252	-0.0737225	0.0949649	-0.776313	0.437564	0.819536
ENSMUSG00000001493	125.445	-0.108295	0.183631	-0.589744	0.555362	0.872628
ENSMUSG00000001504	1368.17	-0.198569	0.0769755	-2.57964	0.00989027	0.187577
ENSMUSG00000001506	31312	-0.0541794	0.30755	-0.176164	0.860165	0.968361
ENSMUSG00000001507	19481.5	-0.215591	0.121779	-1.77035	0.0766693	0.458436
ENSMUSG00000001508	45.3067	0.177508	0.267367	0.663913	0.506746	0.851859
ENSMUSG00000001510	17.719	-0.0601572	0.383107	-0.157025	0.875225	NA
ENSMUSG00000001517	775.07	0.0381007	0.143737	0.265072	0.790954	0.952884
ENSMUSG00000001518	293.546	0.139585	0.156003	0.894757	0.370917	0.783186
ENSMUSG00000001520	9.86752	0.120722	0.511402	0.236061	0.813385	NA
ENSMUSG00000001521	848.669	0.0418201	0.112326	0.372311	0.709661	0.930504
ENSMUSG00000001524	391.46	0.050138	0.109565	0.457609	0.647233	0.904652
ENSMUSG00000001525	29441.1	-0.036255	0.0678998	-0.53395	0.593376	0.886821
ENSMUSG00000001542	564.118	-0.0874471	0.158707	-0.550999	0.581634	0.881961
ENSMUSG00000001552	4872.9	-0.410675	0.141514	-2.902	0.00370788	0.11559
ENSMUSG00000001555	438.801	-0.097661	0.120717	-0.809009	0.41851	0.808221
ENSMUSG00000001558	7.77654	0.586887	0.532422	1.1023	0.270333	NA
ENSMUSG00000001569	918.911	-0.0281993	0.0819226	-0.344219	0.730682	0.934426
ENSMUSG00000001576	2872.16	-0.0204468	0.0720291	-0.283868	0.776512	0.948925
ENSMUSG00000001583	749.887	-0.281334	0.172361	-1.63224	0.102629	0.51385
ENSMUSG00000001588	351.257	0.0188382	0.157878	0.119321	0.905021	0.980504
ENSMUSG00000001604	166.883	-0.206506	0.193816	-1.06548	0.28666	0.720799
ENSMUSG00000001622	222.125	1.03179	0.25172	4.09897	4.14999e-05	0.00821934
ENSMUSG00000001627	830.834	0.395095	0.138986	2.8427	0.00447331	0.124619
ENSMUSG00000001630	340.973	-0.0203981	0.123795	-0.164773	0.869123	0.971111
ENSMUSG00000001632	789.589	-0.062308	0.080979	-0.769434	0.441636	0.821391
ENSMUSG00000001642	813.646	0.0503165	0.0781681	0.643695	0.519773	0.857579
ENSMUSG00000001656	12.8171	0.0495566	0.567514	0.0873223	0.930415	NA
ENSMUSG00000001657	10.1588	-0.213321	0.567502	-0.375895	0.706995	NA
ENSMUSG00000001661	32.9262	-0.287155	0.282145	-1.01776	0.308794	0.741778
ENSMUSG00000001663	63.3241	0.279506	0.236571	1.18149	0.237409	0.685739
ENSMUSG00000001665	193.646	0.053401	0.131637	0.40567	0.684985	0.920574
ENSMUSG00000001666	78.0154	0.037229	0.255592	0.145658	0.884192	0.974444
ENSMUSG00000001672	238.451	-0.352782	0.195765	-1.80206	0.0715356	0.448452
ENSMUSG00000001674	995.726	0.0207857	0.0816939	0.254434	0.79916	0.95514
ENSMUSG00000001687	884.831	-0.220782	0.10403	-2.1223	0.0338127	0.338714
ENSMUSG00000001700	197.795	-0.11645	0.150924	-0.771584	0.440361	0.820988
ENSMUSG00000001707	345.376	-0.0499704	0.154917	-0.322562	0.747027	0.940218
ENSMUSG00000001729	7098.43	-0.195814	0.0998638	-1.96081	0.0499014	0.395702
ENSMUSG00000001739	18.8063	-0.00419593	0.382443	-0.0109714	0.991246	NA
ENSMUSG00000001741	131.924	0.303723	0.164029	1.85164	0.0640782	0.430963
ENSMUSG00000001750	6108.33	0.0715081	0.0833092	0.858345	0.390702	0.793764
ENSMUSG00000001751	738.141	0.104305	0.111104	0.938805	0.347831	0.770709
ENSMUSG00000001755	987.687	-0.0524914	0.108183	-0.48521	0.627527	0.896785
ENSMUSG00000001761	2225.52	-0.19181	0.102815	-1.86559	0.0620985	0.425775
ENSMUSG00000001763	25.0561	-0.27989	0.285123	-0.981647	0.326274	0.752115
ENSMUSG00000001767	612.731	0.110114	0.104471	1.05402	0.291874	0.726489
ENSMUSG00000001768	2661.44	0.0599286	0.0696421	0.860522	0.389501	0.793191
ENSMUSG00000001774	1074.34	0.041707	0.146024	0.285617	0.775172	0.948748
ENSMUSG00000001783	3970.66	-0.13236	0.112834	-1.17305	0.240774	0.687361
ENSMUSG00000001785	594.26	-0.0336183	0.0976957	-0.344113	0.730762	0.934426
ENSMUSG00000001786	422.558	-0.152081	0.11802	-1.2886	0.197537	0.65087
ENSMUSG00000001794	5020.07	-0.0458102	0.0853861	-0.536506	0.591609	0.886202
ENSMUSG00000001802	18.8597	-0.0720244	0.381138	-0.188972	0.850115	NA
ENSMUSG00000001819	0.412717	1.27995	2.34184	0.546556	0.584684	NA
ENSMUSG00000001829	427.723	0.0332251	0.117595	0.282539	0.77753	0.949531
ENSMUSG00000001833	2897.47	0.254721	0.164298	1.55036	0.121056	0.546303
ENSMUSG00000001844	473.504	-0.0720296	0.0877562	-0.820792	0.411765	0.802477
ENSMUSG00000001847	5029.66	-0.0377193	0.104618	-0.360545	0.71844	0.932601
ENSMUSG00000001855	719.468	-0.0955873	0.114847	-0.832302	0.405239	0.800245
ENSMUSG00000001864	263.386	-0.268994	0.140388	-1.91608	0.0553552	0.406521
ENSMUSG00000001865	18.4662	-0.558699	0.606142	-0.92173	0.356669	NA
ENSMUSG00000001870	5759.93	-0.17419	0.0916677	-1.90024	0.0574018	0.412341
ENSMUSG00000001891	1083.81	0.0493104	0.134155	0.367562	0.7132	0.931875
ENSMUSG00000001909	2091	0.0349128	0.11376	0.306898	0.758921	0.943394
ENSMUSG00000001910	3652.18	-0.111682	0.0951286	-1.17401	0.240391	0.687361
ENSMUSG00000001911	7351.42	-0.178859	0.101169	-1.76792	0.0770741	0.458608
ENSMUSG00000001918	1130.02	0.0952046	0.109335	0.870757	0.383887	0.788943
ENSMUSG00000001924	6018.79	0.01092	0.0805213	0.135617	0.892124	0.97774
ENSMUSG00000001930	233.819	-0.40745	0.139851	-2.91345	0.00357454	0.113664
ENSMUSG00000001942	998.891	0.189748	0.113545	1.67112	0.0946977	0.497859
ENSMUSG00000001943	38.3814	0.389233	0.287331	1.35465	0.175529	0.625803
ENSMUSG00000001946	641.14	0.265585	0.114859	2.31228	0.0207625	0.267939
ENSMUSG00000001948	38.6257	0.475748	0.300296	1.58426	0.113134	0.530072
ENSMUSG00000001962	650.875	0.0427437	0.102974	0.415091	0.678075	0.917615
ENSMUSG00000001964	786.978	-0.0214747	0.0791359	-0.271365	0.78611	0.952036
ENSMUSG00000001983	98.9925	0.0462648	0.181301	0.255182	0.798582	0.95514
ENSMUSG00000001985	2.8367	-0.499943	0.923424	-0.541401	0.588231	NA
ENSMUSG00000001986	24.5607	-0.122561	0.377892	-0.324329	0.745689	0.939335
ENSMUSG00000001988	7.77551	-0.0043611	0.555964	-0.00784422	0.993741	NA
ENSMUSG00000001995	294.826	-0.0176991	0.203502	-0.086973	0.930693	0.986308
ENSMUSG00000001998	182.712	0.0290372	0.157361	0.184526	0.853601	0.966395
ENSMUSG00000001999	419.883	0.0554569	0.0995631	0.557002	0.577526	0.881275
ENSMUSG00000002006	286.676	-0.125841	0.106112	-1.18593	0.235652	0.684565
ENSMUSG00000002007	13.6034	0.188828	0.458905	0.411476	0.680724	NA
ENSMUSG00000002010	1633.29	-0.0949654	0.0782305	-1.21392	0.224779	0.676877
ENSMUSG00000002012	65.5348	-0.217171	0.264796	-0.820146	0.412133	0.802477
ENSMUSG00000002014	1474.32	0.0800367	0.100801	0.794009	0.42719	0.813005
ENSMUSG00000002015	1655.29	0.147328	0.0898457	1.63979	0.101048	0.511009
ENSMUSG00000002017	499.971	-0.0545104	0.123453	-0.441548	0.658816	0.910698
ENSMUSG00000002020	8101.29	0.283147	0.141987	1.99418	0.046132	0.387151
ENSMUSG00000002028	3256.12	-0.21346	0.108359	-1.96994	0.048845	0.392854
ENSMUSG00000002031	1105.88	0.0242889	0.0845955	0.287118	0.774022	0.948056
ENSMUSG00000002032	52.5587	-0.480056	0.241805	-1.9853	0.047111	0.388778
ENSMUSG00000002033	89.8254	0.408898	0.60057	0.68085	0.495967	0.847462
ENSMUSG00000002043	668.972	-0.0223671	0.109861	-0.203593	0.838671	0.962956
ENSMUSG00000002052	2760.78	-0.111933	0.102553	-1.09147	0.275066	0.712408
ENSMUSG00000002055	754.457	0.265418	0.145527	1.82384	0.0681763	0.440593
ENSMUSG00000002057	2.14683	-0.412407	1.16268	-0.354705	0.722811	NA
ENSMUSG00000002058	759.317	-0.146889	0.0877193	-1.67453	0.0940267	0.4968
ENSMUSG00000002059	1583.15	-0.0484487	0.100606	-0.48157	0.630112	0.898375
ENSMUSG00000002064	1288.51	-0.0485149	0.0971987	-0.499131	0.617687	0.894832
ENSMUSG00000002068	113.092	0.222691	0.170724	1.30439	0.192101	0.642841
ENSMUSG00000002076	10.8143	0.574612	0.499664	1.15	0.250145	NA
ENSMUSG00000002083	244.142	0.0710488	0.144839	0.490535	0.623755	0.895798
ENSMUSG00000002100	18.8767	0.0152971	0.375918	0.0406926	0.967541	NA
ENSMUSG00000002102	2290.65	0.0670293	0.0697473	0.961031	0.336537	0.760648
ENSMUSG00000002103	816.219	0.203663	0.0945367	2.15433	0.0312145	0.324894
ENSMUSG00000002104	39.599	0.146047	0.264306	0.552567	0.58056	0.881961
ENSMUSG00000002105	896.916	0.0117557	0.122421	0.0960268	0.923499	0.985085
ENSMUSG00000002107	640.131	0.431842	0.184831	2.33642	0.0194694	0.260249
ENSMUSG00000002108	102.202	0.471817	0.199494	2.36507	0.0180268	0.251686
ENSMUSG00000002109	176.002	-0.141282	0.138652	-1.01897	0.308216	0.741601
ENSMUSG00000002111	953.601	0.0803127	0.139422	0.576039	0.564589	0.87656
ENSMUSG00000002129	2121.65	-0.115055	0.0690785	-1.66557	0.0957998	0.499875
ENSMUSG00000002147	2832.21	-0.0892546	0.0832269	-1.07243	0.283529	0.71887
ENSMUSG00000002190	2.00355	0.0949669	1.17458	0.0808518	0.93556	NA
ENSMUSG00000002204	80.0726	-0.254368	0.250204	-1.01664	0.309323	0.742075
ENSMUSG00000002205	647.986	-0.208753	0.0953699	-2.18887	0.0286061	0.311608
ENSMUSG00000002210	593.917	-0.000874595	0.114534	-0.0076361	0.993907	0.998806
ENSMUSG00000002221	705.342	-0.0708747	0.0909764	-0.779045	0.435953	0.818679
ENSMUSG00000002222	1124.83	-0.123218	0.098612	-1.24953	0.211472	0.664983
ENSMUSG00000002227	2676.45	-0.0605849	0.0705739	-0.858461	0.390638	0.793761
ENSMUSG00000002228	564.861	0.2273	0.131526	1.72818	0.0839568	0.471437
ENSMUSG00000002233	6709.13	-0.0697617	0.068655	-1.01612	0.309572	0.742225
ENSMUSG00000002249	521.145	-0.157861	0.115861	-1.3625	0.17304	0.62311
ENSMUSG00000002250	1092.21	-0.0102379	0.13032	-0.0785597	0.937383	0.988355
ENSMUSG00000002257	367.497	-0.186726	0.114677	-1.62828	0.103466	0.514147
ENSMUSG00000002265	119.923	-0.372269	0.195059	-1.9085	0.0563272	0.408378
ENSMUSG00000002266	7.48335	-0.207766	0.64608	-0.321579	0.747772	NA
ENSMUSG00000002274	178.416	0.204626	0.15865	1.28979	0.197122	0.650691
ENSMUSG00000002279	378.493	-0.0325235	0.125101	-0.259979	0.79488	0.953579
ENSMUSG00000002280	427.232	0.120957	0.124056	0.975021	0.32955	0.75501
ENSMUSG00000002289	300.159	0.359539	0.175477	2.04893	0.0404689	0.365989
ENSMUSG00000002297	562.287	0.102331	0.125807	0.813395	0.415992	0.805603
ENSMUSG00000002307	804.929	-0.0563574	0.0988331	-0.570228	0.568523	0.878549
ENSMUSG00000002308	422.082	0.102078	0.116762	0.874238	0.381989	0.787857
ENSMUSG00000002319	666.884	0.0983873	0.112314	0.875999	0.38103	0.787274
ENSMUSG00000002320	698.063	0.0436457	0.118203	0.369245	0.711945	0.931168
ENSMUSG00000002324	1.08206	-1.82274	1.42702	-1.2773	0.201496	NA
ENSMUSG00000002325	1321.39	-0.0520739	0.168008	-0.309948	0.7566	0.942909
ENSMUSG00000002326	109.017	0.0904426	0.194217	0.465679	0.641445	0.902355
ENSMUSG00000002329	318.142	0.00596134	0.109153	0.0546145	0.956446	0.990042
ENSMUSG00000002332	549.404	0.0230504	0.115136	0.2002	0.841324	0.964375
ENSMUSG00000002341	0.918955	-0.690153	1.75792	-0.392597	0.694617	NA
ENSMUSG00000002342	958.856	0.0219639	0.0990353	0.221778	0.824486	0.960619
ENSMUSG00000002343	244.544	0.136198	0.132589	1.02722	0.304318	0.737278
ENSMUSG00000002345	422.493	-0.138077	0.10449	-1.32144	0.186356	0.635131
ENSMUSG00000002346	99.3262	-0.24176	0.181399	-1.33275	0.182614	0.631835
ENSMUSG00000002365	2739.59	-0.128764	0.132696	-0.970369	0.331863	0.75705
ENSMUSG00000002372	2087	-0.10709	0.0821576	-1.30347	0.192413	0.64325
ENSMUSG00000002379	378.506	0.0292875	0.132013	0.221853	0.824428	0.960619
ENSMUSG00000002384	2.92033	0.243662	0.860274	0.283237	0.776995	NA
ENSMUSG00000002393	394.632	-0.380465	0.0997007	-3.81607	0.000135594	0.0179036
ENSMUSG00000002395	1518.46	-0.146812	0.117181	-1.25286	0.210257	0.664453
ENSMUSG00000002396	335.624	0.030992	0.109629	0.282699	0.777407	0.949518
ENSMUSG00000002409	363.266	-0.121256	0.168198	-0.720911	0.470964	0.836471
ENSMUSG00000002413	383.064	-0.0823747	0.111618	-0.738008	0.46051	0.83204
ENSMUSG00000002416	103.63	0.221024	0.179424	1.23185	0.218004	0.669428
ENSMUSG00000002428	650.886	-0.0577286	0.100302	-0.575548	0.564921	0.87656
ENSMUSG00000002455	1667.04	-0.00152809	0.0843966	-0.0181061	0.985554	0.997528
ENSMUSG00000002458	733.636	-0.0896775	0.0866268	-1.03522	0.300568	0.734441
ENSMUSG00000002459	42.4971	0.351764	0.396718	0.886686	0.375248	0.785629
ENSMUSG00000002475	7.60088	0.290622	0.559108	0.519795	0.603206	NA
ENSMUSG00000002477	1254.44	0.168304	0.117067	1.43767	0.150526	0.59784
ENSMUSG00000002486	246.946	-0.209427	0.118271	-1.77075	0.076603	0.458436
ENSMUSG00000002489	715.967	-0.249391	0.15395	-1.61995	0.105242	0.516858
ENSMUSG00000002496	1641.17	-0.0885428	0.120274	-0.736175	0.461624	0.832419
ENSMUSG00000002500	29.222	0.756897	0.530226	1.4275	0.153437	0.601569
ENSMUSG00000002504	830.62	-0.0538206	0.108047	-0.498123	0.618397	0.89493
ENSMUSG00000002524	2031.64	0.0100037	0.0769509	0.130001	0.896566	0.97864
ENSMUSG00000002546	1275.08	-0.0509352	0.102291	-0.497943	0.618524	0.89493
ENSMUSG00000002550	562.611	-0.0675941	0.0920289	-0.734488	0.462651	0.832856
ENSMUSG00000002565	53.3687	-0.601879	0.406477	-1.48072	0.138681	0.579986
ENSMUSG00000002578	15.0063	0.208601	0.446658	0.467026	0.640481	NA
ENSMUSG00000002580	118.59	0.0745918	0.267307	0.279049	0.780207	0.950252
ENSMUSG00000002588	1.23322	-0.0100322	1.24915	-0.00803127	0.993592	NA
ENSMUSG00000002602	11368.9	0.0279721	0.0858444	0.325846	0.744541	0.938827
ENSMUSG00000002603	2754.39	-0.0257851	0.103218	-0.249812	0.802733	0.955591
ENSMUSG00000002608	1127.33	-0.150408	0.0984391	-1.52793	0.126529	0.559341
ENSMUSG00000002617	39.7037	0.254708	0.279167	0.912385	0.361566	0.77915
ENSMUSG00000002625	1833.36	-0.0110429	0.114497	-0.096447	0.923166	0.985053
ENSMUSG00000002635	251.289	-0.0412373	0.120489	-0.34225	0.732163	0.93486
ENSMUSG00000002658	1595.47	0.0244253	0.0914921	0.266966	0.789496	0.952599
ENSMUSG00000002660	778.076	-0.0288407	0.119534	-0.241277	0.809341	0.956358
ENSMUSG00000002661	144.609	0.0711277	0.130762	0.543946	0.586479	0.884693
ENSMUSG00000002664	5.71154	-0.559503	0.677218	-0.826179	0.408703	NA
ENSMUSG00000002668	241.916	0.11986	0.130311	0.919801	0.357677	0.776988
ENSMUSG00000002679	319.589	0.147713	0.110669	1.33473	0.181965	0.631491
ENSMUSG00000002688	20.1336	-0.281011	0.377845	-0.743718	0.457047	NA
ENSMUSG00000002699	547.827	0.127575	0.136254	0.936303	0.349117	0.771952
ENSMUSG00000002718	1216.82	0.136292	0.128269	1.06254	0.287989	0.722472
ENSMUSG00000002728	932.29	0.122937	0.109862	1.11901	0.263134	0.704475
ENSMUSG00000002731	426.166	-0.0594291	0.11961	-0.496857	0.61929	0.895108
ENSMUSG00000002732	143.941	0.273905	0.156796	1.74689	0.080656	0.466312
ENSMUSG00000002733	562.94	-0.121468	0.100131	-1.21309	0.225094	0.676912
ENSMUSG00000002741	1633.42	-0.0901452	0.0768349	-1.17323	0.240702	0.687361
ENSMUSG00000002748	3759.24	-0.0705016	0.0717354	-0.982801	0.325705	0.752003
ENSMUSG00000002763	1543.78	-0.0534804	0.110463	-0.484146	0.628282	0.897169
ENSMUSG00000002767	972.873	0.0576078	0.0880497	0.654264	0.512942	0.854219
ENSMUSG00000002768	750.334	-0.0950747	0.114811	-0.828101	0.407613	0.800718
ENSMUSG00000002769	18.5782	0.41872	0.329772	1.26973	0.204182	NA
ENSMUSG00000002771	128.368	-0.366416	0.206763	-1.77216	0.0763684	0.458391
ENSMUSG00000002778	2344.44	0.0109322	0.0848331	0.128867	0.897463	0.97864
ENSMUSG00000002781	192.94	-0.145407	0.117757	-1.23481	0.216901	0.668992
ENSMUSG00000002791	1.85457	0.987491	1.41299	0.698868	0.484635	NA
ENSMUSG00000002797	111.475	0.302945	0.171355	1.76794	0.0770712	0.458608
ENSMUSG00000002799	586.96	-0.116604	0.104074	-1.12039	0.262546	0.704475
ENSMUSG00000002803	240.28	-0.084282	0.118577	-0.710776	0.477223	0.837401
ENSMUSG00000002804	342.075	-0.140003	0.123764	-1.13121	0.257967	0.700031
ENSMUSG00000002808	114.342	-0.111297	0.194683	-0.571683	0.567536	0.878063
ENSMUSG00000002812	2976.64	-0.100123	0.116438	-0.85988	0.389855	0.793273
ENSMUSG00000002814	299.444	0.216212	0.122171	1.76976	0.0767677	0.458436
ENSMUSG00000002820	295.433	-0.190218	0.100445	-1.89374	0.0582597	0.41485
ENSMUSG00000002825	599.732	-0.0135477	0.125963	-0.107553	0.91435	0.98316
ENSMUSG00000002831	56.5975	-0.45308	0.512384	-0.884258	0.376557	0.78576
ENSMUSG00000002833	1575.59	0.180686	0.103427	1.74699	0.0806391	0.466312
ENSMUSG00000002835	573.36	0.0907529	0.161434	0.562166	0.574003	0.879926
ENSMUSG00000002844	879.138	0.10756	0.083561	1.28721	0.198022	0.65087
ENSMUSG00000002845	598.859	0.00204194	0.093229	0.0219024	0.982526	0.996654
ENSMUSG00000002846	377.353	0.0238733	0.111238	0.214615	0.830068	0.960942
ENSMUSG00000002847	547.384	0.409187	0.156849	2.60879	0.00908633	0.180995
ENSMUSG00000002870	1442.07	0.100241	0.0952147	1.05279	0.292439	0.726912
ENSMUSG00000002871	866.166	0.0300636	0.0934641	0.32166	0.747711	0.940345
ENSMUSG00000002881	1179.02	0.0774255	0.116617	0.663932	0.506734	0.851859
ENSMUSG00000002885	486.387	0.374506	0.148286	2.52557	0.0115512	0.203208
ENSMUSG00000002897	1317.41	0.228603	0.103624	2.20607	0.0273789	0.30513
ENSMUSG00000002900	10424.4	0.0415015	0.115734	0.358593	0.7199	0.932601
ENSMUSG00000002908	104.286	0.107904	0.202814	0.532032	0.594704	0.88732
ENSMUSG00000002910	243.529	0.125211	0.12746	0.982359	0.325923	0.752003
ENSMUSG00000002944	120.332	0.250944	0.307409	0.816321	0.414316	0.804043
ENSMUSG00000002948	886.934	-0.160471	0.0930062	-1.72539	0.0844581	0.471958
ENSMUSG00000002949	1336.95	0.0828998	0.104458	0.793621	0.427416	0.813005
ENSMUSG00000002957	1613.76	0.0547394	0.0989831	0.553018	0.580251	0.881943
ENSMUSG00000002963	624.726	0.0155061	0.0973268	0.15932	0.873417	0.972788
ENSMUSG00000002968	1506.77	-0.125692	0.1001	-1.25566	0.209238	0.662603
ENSMUSG00000002980	503.736	0.0708111	0.125253	0.565346	0.571838	0.879425
ENSMUSG00000002981	1778.81	-0.111819	0.0965064	-1.15867	0.246589	0.691826
ENSMUSG00000002983	713.909	0.011529	0.120082	0.0960094	0.923513	0.985085
ENSMUSG00000002984	1009.09	-0.0771213	0.0850949	-0.906297	0.364779	0.780217
ENSMUSG00000002985	41988	0.171915	0.117738	1.46014	0.144251	0.589258
ENSMUSG00000002992	0.778625	3.05858	1.9282	1.58623	0.112686	NA
ENSMUSG00000002996	491.728	-0.0267113	0.127178	-0.210031	0.833643	0.961167
ENSMUSG00000002997	366.859	0.346699	0.176324	1.96626	0.0492688	0.393923
ENSMUSG00000003031	1780.48	0.0291233	0.122559	0.237626	0.812171	0.957397
ENSMUSG00000003032	288.488	0.052511	0.170058	0.308782	0.757487	0.942909
ENSMUSG00000003033	1191.56	0.0518229	0.103141	0.502448	0.615352	0.893698
ENSMUSG00000003037	1706.69	-0.0110658	0.0683542	-0.161888	0.871394	0.971845
ENSMUSG00000003038	619.796	-0.161567	0.11118	-1.4532	0.146167	0.592286
ENSMUSG00000003039	2088.87	-0.0490683	0.10216	-0.48031	0.631007	0.898827
ENSMUSG00000003051	279.479	0.702926	0.445385	1.57824	0.114509	0.532762
ENSMUSG00000003062	573.009	0.025594	0.0890373	0.287452	0.773766	0.947993
ENSMUSG00000003068	2515.28	-0.109421	0.0852434	-1.28363	0.199271	0.652317
ENSMUSG00000003070	44.1988	-0.191693	0.276777	-0.692592	0.488565	0.843206
ENSMUSG00000003072	3623.77	-0.0149263	0.0802509	-0.185996	0.852448	0.966395
ENSMUSG00000003099	1011.41	-0.0833232	0.0806626	-1.03298	0.301611	0.73582
ENSMUSG00000003119	735.258	-0.139084	0.103788	-1.34008	0.180218	0.630092
ENSMUSG00000003123	260.091	-0.214114	0.154069	-1.38972	0.164612	0.612684
ENSMUSG00000003131	2096.18	0.0241907	0.0848614	0.285061	0.775598	0.948847
ENSMUSG00000003134	333.256	-0.17189	0.109756	-1.56611	0.117322	0.538297
ENSMUSG00000003135	655.017	0.0143155	0.0824201	0.173689	0.86211	0.969288
ENSMUSG00000003153	139.391	0.170054	0.187763	0.905685	0.365102	0.780217
ENSMUSG00000003154	477.362	-0.140368	0.0993265	-1.4132	0.157597	0.602904
ENSMUSG00000003161	1463.13	-0.019172	0.0716073	-0.267738	0.788901	0.952599
ENSMUSG00000003166	1130.26	-0.12897	0.0906267	-1.42309	0.154711	0.601997
ENSMUSG00000003184	1054.99	-0.162144	0.0913788	-1.77441	0.0759954	0.457888
ENSMUSG00000003190	105.988	0.205685	0.205734	0.999759	0.317427	0.746026
ENSMUSG00000003198	97.7094	0.0991669	0.179921	0.551168	0.581519	0.881961
ENSMUSG00000003199	1276.91	-0.0249165	0.106481	-0.234	0.814985	0.958513
ENSMUSG00000003200	1464.87	-0.0622784	0.0876271	-0.710721	0.477257	0.837401
ENSMUSG00000003206	32.8419	0.0506077	0.291327	0.173714	0.86209	0.969288
ENSMUSG00000003208	220.583	-0.0186187	0.152766	-0.121877	0.902997	0.979824
ENSMUSG00000003226	2314.19	-0.00922983	0.125751	-0.0733978	0.94149	0.988971
ENSMUSG00000003227	6.03738	0.0388978	0.900515	0.043195	0.965546	NA
ENSMUSG00000003228	247.379	0.233375	0.173587	1.34442	0.178811	0.627945
ENSMUSG00000003233	1119.37	-0.201123	0.0789229	-2.54835	0.0108234	0.196275
ENSMUSG00000003234	1010.2	-0.0954308	0.0764949	-1.24755	0.212198	0.665186
ENSMUSG00000003235	1251.81	-0.0666138	0.0755196	-0.882073	0.377737	0.785828
ENSMUSG00000003269	1406.49	-0.195481	0.0979935	-1.99483	0.046061	0.387024
ENSMUSG00000003271	86.9758	-0.090605	0.249131	-0.363684	0.716094	0.932014
ENSMUSG00000003273	16.8351	-0.612543	0.418762	-1.46275	0.143537	NA
ENSMUSG00000003279	55.7584	0.582456	0.306143	1.90256	0.0570978	0.410652
ENSMUSG00000003282	127.944	-0.151243	0.223137	-0.677806	0.497894	0.847826
ENSMUSG00000003283	452.925	0.225791	0.114322	1.97504	0.0482636	0.390617
ENSMUSG00000003299	739.874	0.00782862	0.0891469	0.087817	0.930022	0.986215
ENSMUSG00000003308	1235.32	-0.111886	0.0886337	-1.26234	0.206826	0.658574
ENSMUSG00000003309	321.565	-0.310257	0.65207	-0.475803	0.634215	0.900465
ENSMUSG00000003316	4939.2	-0.190795	0.120998	-1.57685	0.114831	0.532797
ENSMUSG00000003341	1.98474	0.630545	1.29583	0.486597	0.626544	NA
ENSMUSG00000003344	916.377	-0.104205	0.0897941	-1.16049	0.245851	0.690937
ENSMUSG00000003345	3847.5	-0.243608	0.0771783	-3.15643	0.00159715	0.07166
ENSMUSG00000003346	1309.51	-0.150026	0.083252	-1.80207	0.0715349	0.448452
ENSMUSG00000003348	1137.11	-0.13308	0.0679737	-1.95782	0.0502517	0.395702
ENSMUSG00000003352	1146.71	-0.248646	0.11486	-2.16477	0.0304053	0.322278
ENSMUSG00000003354	7.08398	0.282773	0.614221	0.460376	0.645246	NA
ENSMUSG00000003355	344.519	0.279296	0.11821	2.36271	0.0181417	0.25278
ENSMUSG00000003360	1541.45	-0.0966096	0.0931255	-1.03741	0.299544	0.733466
ENSMUSG00000003363	1479.1	0.122202	0.112322	1.08795	0.276615	0.713753
ENSMUSG00000003378	1150.88	-0.0233996	0.120005	-0.194989	0.845401	0.965381
ENSMUSG00000003379	28.2161	0.761787	0.561789	1.356	0.175099	0.625217
ENSMUSG00000003380	1346.23	-0.124087	0.0972023	-1.27659	0.201747	0.654579
ENSMUSG00000003382	676.301	-0.15789	0.0988862	-1.59668	0.110336	0.525129
ENSMUSG00000003402	3445.99	0.0959318	0.0834766	1.14921	0.250471	0.693791
ENSMUSG00000003410	6.25048	-0.908613	0.617872	-1.47055	0.141412	NA
ENSMUSG00000003411	0.511089	1.33758	2.53436	0.527778	0.597653	NA
ENSMUSG00000003418	24.45	0.311386	0.418423	0.744189	0.456762	0.831028
ENSMUSG00000003420	1215.68	0.319208	0.0973153	3.28014	0.00103755	0.0582369
ENSMUSG00000003421	755.619	0.0118798	0.115128	0.103188	0.917813	0.983807
ENSMUSG00000003423	733.88	0.0193264	0.100096	0.193078	0.846898	0.965495
ENSMUSG00000003429	4665.68	0.0505905	0.136064	0.371813	0.710032	0.930688
ENSMUSG00000003435	2345.92	-0.212	0.122186	-1.73507	0.0827288	0.469935
ENSMUSG00000003436	0.351015	-0.15496	2.47759	-0.0625447	0.950129	NA
ENSMUSG00000003437	1012.35	-0.0156411	0.0931989	-0.167825	0.866721	0.970458
ENSMUSG00000003438	793.507	0.0036531	0.0824211	0.0443224	0.964647	0.991172
ENSMUSG00000003444	125.726	-0.0324387	0.155712	-0.208325	0.834975	0.96134
ENSMUSG00000003452	61.249	0.264555	0.253332	1.0443	0.296347	0.729427
ENSMUSG00000003458	2830.51	-0.0444182	0.0877557	-0.506158	0.612746	0.891875
ENSMUSG00000003464	1312.69	-0.10456	0.0818373	-1.27765	0.201373	0.653809
ENSMUSG00000003469	2.68354	0.199501	1.05674	0.188789	0.850258	NA
ENSMUSG00000003476	5.25404	0.722815	0.789235	0.915843	0.359749	NA
ENSMUSG00000003477	37.2954	-0.0763208	0.465301	-0.164025	0.869712	0.971344
ENSMUSG00000003484	76.7719	0.413834	0.198076	2.08926	0.0366841	0.35045
ENSMUSG00000003500	745.802	-0.0339459	0.097276	-0.348965	0.727116	0.933366
ENSMUSG00000003518	378.311	-0.0721265	0.160494	-0.449404	0.653141	0.907238
ENSMUSG00000003526	498.078	0.0991121	0.122526	0.808908	0.418568	0.808221
ENSMUSG00000003527	594.148	-0.0911534	0.102688	-0.887673	0.374717	0.785584
ENSMUSG00000003528	1017.68	-0.185511	0.0965113	-1.92217	0.0545844	0.405497
ENSMUSG00000003531	497.258	-0.0802324	0.103845	-0.772617	0.439749	0.820379
ENSMUSG00000003534	1270.57	-0.264559	0.130983	-2.0198	0.0434046	0.377721
ENSMUSG00000003541	1586.94	0.0129936	0.165847	0.0783471	0.937552	0.98837
ENSMUSG00000003545	107.659	-0.293859	0.236229	-1.24396	0.213515	0.665186
ENSMUSG00000003546	444.985	0.0558463	0.112333	0.497151	0.619083	0.895108
ENSMUSG00000003549	2580.64	-0.372085	0.108496	-3.42948	0.000604732	0.0413005
ENSMUSG00000003559	279.034	0.0267318	0.123487	0.216475	0.828617	0.960942
ENSMUSG00000003573	517.757	-0.312889	0.13537	-2.31136	0.020813	0.267939
ENSMUSG00000003575	940.47	-0.343126	0.11625	-2.95162	0.00316111	0.106892
ENSMUSG00000003581	431.121	-0.130214	0.102717	-1.26769	0.204907	0.656232
ENSMUSG00000003585	615.7	-0.0992026	0.0989396	-1.00266	0.316026	0.74478
ENSMUSG00000003604	169.913	-0.0159736	0.141049	-0.113248	0.909834	0.981759
ENSMUSG00000003617	14421.2	0.299795	0.09487	3.16006	0.00157735	0.0712597
ENSMUSG00000003623	551.331	-0.051524	0.0942241	-0.546825	0.584499	0.884154
ENSMUSG00000003644	1822.57	-0.202562	0.0716617	-2.82664	0.00470392	0.129165
ENSMUSG00000003657	0.425357	-0.511248	2.34033	-0.218452	0.827077	NA
ENSMUSG00000003660	2435.77	-0.0153652	0.11061	-0.138914	0.889518	0.976836
ENSMUSG00000003662	781.961	-0.0768599	0.0898945	-0.855002	0.39255	0.79447
ENSMUSG00000003665	28.7182	0.025091	0.407343	0.0615967	0.950884	0.989158
ENSMUSG00000003680	319.972	-0.0683362	0.116856	-0.58479	0.558689	0.874415
ENSMUSG00000003721	835.922	0.0179574	0.0926293	0.193863	0.846283	0.965415
ENSMUSG00000003731	1183.65	-0.200866	0.115792	-1.73472	0.0827903	0.470026
ENSMUSG00000003746	1347.41	-0.227616	0.14431	-1.57727	0.114734	0.532762
ENSMUSG00000003752	116.639	-0.286811	0.175262	-1.63647	0.101741	0.511992
ENSMUSG00000003762	199.615	0.0855313	0.137563	0.621763	0.534098	0.863425
ENSMUSG00000003778	1258.33	0.0731506	0.0874789	0.836209	0.403038	0.799898
ENSMUSG00000003779	479.675	0.103651	0.199517	0.519508	0.603406	0.889014
ENSMUSG00000003808	1435.91	-0.109383	0.0921509	-1.187	0.235228	0.684521
ENSMUSG00000003809	472.291	0.0653444	0.103316	0.632474	0.527077	0.862217
ENSMUSG00000003810	1364.79	-0.225735	0.115127	-1.96074	0.0499089	0.395702
ENSMUSG00000003812	691.591	0.0161893	0.0988129	0.163838	0.869859	0.971344
ENSMUSG00000003813	719.062	-0.0391026	0.0958342	-0.408023	0.683257	0.919498
ENSMUSG00000003814	13140.7	0.0899374	0.0796857	1.12865	0.259045	0.701123
ENSMUSG00000003824	51.3931	0.00959972	0.23264	0.0412643	0.967085	0.991929
ENSMUSG00000003847	5758.37	0.0777173	0.0990541	0.784594	0.432692	0.816946
ENSMUSG00000003848	1056.38	-0.00590728	0.106847	-0.0552874	0.955909	0.98997
ENSMUSG00000003849	77.372	0.572295	0.203947	2.80609	0.00501462	0.132931
ENSMUSG00000003863	18.6768	-0.422974	0.344025	-1.22949	0.21889	NA
ENSMUSG00000003865	1195.67	-0.00818457	0.130484	-0.0627249	0.949986	0.989158
ENSMUSG00000003868	1521.65	0.0105449	0.0925344	0.113956	0.909272	0.981711
ENSMUSG00000003872	4.73994	0.224863	0.793087	0.283529	0.776772	NA
ENSMUSG00000003873	598.155	0.15468	0.119584	1.29349	0.195841	0.648625
ENSMUSG00000003882	63.6961	0.34032	0.341874	0.995453	0.319516	0.746863
ENSMUSG00000003923	899.98	-0.0371878	0.103007	-0.361024	0.718081	0.93251
ENSMUSG00000003929	330.085	0.110939	0.13376	0.829388	0.406885	0.80038
ENSMUSG00000003934	49.2746	-0.53686	0.204058	-2.63093	0.00851527	0.174569
ENSMUSG00000003948	1209.81	0.198747	0.179736	1.10577	0.268825	0.707827
ENSMUSG00000003949	33.6538	0.410339	0.382713	1.07218	0.283637	0.718894
ENSMUSG00000003955	1407.64	-0.038714	0.11304	-0.342482	0.731988	0.934723
ENSMUSG00000003970	16304	0.0862811	0.0841796	1.02496	0.30538	0.738053
ENSMUSG00000003992	251.204	-0.15532	0.127221	-1.22086	0.222138	0.673311
ENSMUSG00000004018	227.72	-0.074914	0.114469	-0.654447	0.512824	0.854219
ENSMUSG00000004032	202.963	0.264772	0.120814	2.19158	0.0284101	0.310437
ENSMUSG00000004035	2.70602	-0.0316947	0.914061	-0.0346746	0.972339	NA
ENSMUSG00000004038	0.348974	-1.91237	3.1366	-0.609696	0.542063	NA
ENSMUSG00000004040	4194.19	-0.0870328	0.0750201	-1.16013	0.245997	0.690937
ENSMUSG00000004043	590.678	-0.123601	0.120372	-1.02682	0.304503	0.737278
ENSMUSG00000004044	6810.89	0.0584609	0.110168	0.530654	0.595658	0.887491
ENSMUSG00000004054	1163.01	-0.213071	0.0780127	-2.73124	0.0063097	0.149413
ENSMUSG00000004056	1785.67	-0.173295	0.0960771	-1.80371	0.0712771	0.448115
ENSMUSG00000004069	775.832	-0.10251	0.0764715	-1.3405	0.180084	0.63
ENSMUSG00000004070	602.484	-3.69314e-05	0.0853371	-0.000432771	0.999655	0.999839
ENSMUSG00000004071	769.56	-0.187853	0.109412	-1.71694	0.0859903	0.476487
ENSMUSG00000004085	1813.55	0.139239	0.0933993	1.49079	0.136016	0.576148
ENSMUSG00000004096	1626.64	0.0968162	0.107416	0.90132	0.367418	0.780955
ENSMUSG00000004098	1224.84	-0.0347162	0.149198	-0.232686	0.816005	0.958969
ENSMUSG00000004099	2581.04	0.041617	0.123486	0.337018	0.736103	0.936577
ENSMUSG00000004100	1463.47	0.0245031	0.124514	0.196789	0.843992	0.965023
ENSMUSG00000004105	2378.59	-0.0421474	0.187461	-0.224833	0.82211	0.960457
ENSMUSG00000004110	4.22382	-0.437894	1.25534	-0.348826	0.72722	NA
ENSMUSG00000004113	16.1007	0.277927	0.591911	0.469542	0.638682	NA
ENSMUSG00000004127	249.446	-0.0514278	0.130735	-0.393373	0.694044	0.923157
ENSMUSG00000004151	1540.61	-0.0652384	0.148596	-0.439033	0.660638	0.911304
ENSMUSG00000004187	77.2081	-0.145624	0.180871	-0.805127	0.420747	0.809127
ENSMUSG00000004207	32930	0.146845	0.0701701	2.0927	0.0363758	0.349976
ENSMUSG00000004221	572.228	-0.0841974	0.0907555	-0.927738	0.353543	0.775924
ENSMUSG00000004233	241.468	-0.131014	0.112312	-1.16651	0.243408	0.689259
ENSMUSG00000004263	203.721	-0.0788612	0.205526	-0.383705	0.701197	0.926377
ENSMUSG00000004264	2338.96	0.0257635	0.0818133	0.314907	0.752833	0.942047
ENSMUSG00000004266	1355.69	0.0664759	0.0965233	0.688703	0.49101	0.844691
ENSMUSG00000004267	614.742	0.270494	0.187052	1.44609	0.148151	0.595222
ENSMUSG00000004268	1512.33	0.137719	0.0964937	1.42724	0.153512	0.601569
ENSMUSG00000004270	501.303	0.0521844	0.109303	0.477427	0.633058	0.90016
ENSMUSG00000004285	1350.22	0.00330184	0.0890855	0.0370637	0.970434	0.993216
ENSMUSG00000004296	5.26341	-0.6055	0.700569	-0.864297	0.387425	NA
ENSMUSG00000004317	232.692	-0.0864389	0.168684	-0.512432	0.608349	0.891304
ENSMUSG00000004319	1272.19	-0.184254	0.137604	-1.33902	0.180565	0.63041
ENSMUSG00000004328	5.28448	-0.880327	0.687325	-1.2808	0.200263	NA
ENSMUSG00000004344	0.1598	0.410174	3.16075	0.129771	0.896747	NA
ENSMUSG00000004347	0.874347	0.708372	1.68166	0.421233	0.673585	NA
ENSMUSG00000004356	1359.45	-0.0471296	0.0841647	-0.559968	0.575501	0.880564
ENSMUSG00000004359	5.8863	-0.048767	0.648724	-0.0751738	0.940076	NA
ENSMUSG00000004364	1708.32	0.0757619	0.119638	0.633261	0.526563	0.861968
ENSMUSG00000004366	0.221482	0.987247	3.16075	0.312346	0.754777	NA
ENSMUSG00000004371	41.2605	-0.251206	0.342352	-0.733764	0.463093	0.833158
ENSMUSG00000004383	188.72	0.195818	0.156092	1.2545	0.209659	0.663027
ENSMUSG00000004393	1099.94	-0.0195993	0.0980401	-0.199911	0.84155	0.964464
ENSMUSG00000004394	1521.86	-0.111003	0.0844251	-1.31481	0.188574	0.637967
ENSMUSG00000004415	3.6284	-0.015948	1.10597	-0.0144199	0.988495	NA
ENSMUSG00000004446	798.675	-0.118943	0.0915436	-1.2993	0.193841	0.64387
ENSMUSG00000004451	1772.99	0.174453	0.0717883	2.4301	0.0150946	0.228962
ENSMUSG00000004455	1783.4	0.0121649	0.0798927	0.152266	0.878977	0.973844
ENSMUSG00000004460	1017.81	0.123593	0.0928532	1.33105	0.183171	0.632601
ENSMUSG00000004462	201.797	-0.145905	0.13304	-1.0967	0.272771	0.711358
ENSMUSG00000004473	48.2247	0.23254	0.226528	1.02654	0.304637	0.737278
ENSMUSG00000004500	170.678	-0.258889	0.138475	-1.86957	0.0615431	0.424072
ENSMUSG00000004508	343.79	-0.175898	0.111695	-1.57481	0.1153	0.534022
ENSMUSG00000004530	2215.43	-0.193416	0.160281	-1.20674	0.227534	0.679105
ENSMUSG00000004535	1927.13	-0.016173	0.0844361	-0.191541	0.848102	0.965495
ENSMUSG00000004540	160.202	0.193666	0.191272	1.01252	0.311291	0.742939
ENSMUSG00000004542	28.721	0.466308	0.392383	1.1884	0.234676	0.684521
ENSMUSG00000004552	98.3005	-0.26672	0.200104	-1.33291	0.182563	0.631815
ENSMUSG00000004558	309.573	0.27089	0.241958	1.11957	0.262896	0.704475
ENSMUSG00000004561	502.211	0.0856922	0.123408	0.694382	0.487443	0.842426
ENSMUSG00000004562	3299.64	-0.0972593	0.119833	-0.811627	0.417006	0.806665
ENSMUSG00000004565	857.918	-0.113691	0.12576	-0.904033	0.365978	0.780603
ENSMUSG00000004567	866.014	0.0464045	0.108909	0.426085	0.670046	0.913726
ENSMUSG00000004568	786.122	-0.16614	0.0931071	-1.7844	0.0743594	0.45509
ENSMUSG00000004591	1465.01	-0.0591323	0.112307	-0.526526	0.598523	0.887701
ENSMUSG00000004609	743.756	0.245711	0.164954	1.48957	0.136338	0.576426
ENSMUSG00000004610	75.359	0.424497	0.283608	1.49678	0.134452	0.572669
ENSMUSG00000004612	96.8296	-0.0402697	0.356758	-0.112877	0.910128	0.981759
ENSMUSG00000004626	2709.1	0.012852	0.0962432	0.133536	0.893769	0.978223
ENSMUSG00000004630	0.593012	0.842022	2.47656	0.339997	0.733859	NA
ENSMUSG00000004631	56.9604	0.00335049	0.200882	0.0166789	0.986693	0.997528
ENSMUSG00000004633	38.3607	-0.348317	0.343687	-1.01347	0.310835	0.742939
ENSMUSG00000004637	203.05	0.041552	0.113689	0.365489	0.714746	0.931939
ENSMUSG00000004642	886.084	0.103968	0.0904332	1.14966	0.250283	0.693692
ENSMUSG00000004655	1490.3	0.318075	0.142363	2.23425	0.0254667	0.295737
ENSMUSG00000004661	77.9153	0.301537	0.181233	1.66381	0.0961503	0.50094
ENSMUSG00000004665	3696.47	-0.229297	0.0730645	-3.13829	0.00169939	0.0747946
ENSMUSG00000004667	1982.64	-0.03431	0.0850187	-0.403559	0.686537	0.921769
ENSMUSG00000004668	7.65175	0.472712	0.804134	0.587852	0.556632	NA
ENSMUSG00000004677	2765	-0.0995772	0.0884103	-1.12631	0.260035	0.701604
ENSMUSG00000004698	79.8171	0.641744	0.251631	2.55034	0.0107617	0.196275
ENSMUSG00000004707	295.956	0.214372	0.121773	1.76042	0.0783368	0.463337
ENSMUSG00000004709	60.2551	0.607096	0.288607	2.10354	0.0354189	0.345748
ENSMUSG00000004730	652.738	-0.0211882	0.130738	-0.162066	0.871254	0.971845
ENSMUSG00000004748	43.4382	0.145096	0.27797	0.521983	0.601682	0.888418
ENSMUSG00000004768	355.48	-0.174832	0.0965847	-1.81014	0.0702734	0.445686
ENSMUSG00000004771	1167.94	0.092824	0.127221	0.729629	0.465617	0.833293
ENSMUSG00000004788	827.966	-0.0158547	0.0835473	-0.189769	0.84949	0.965825
ENSMUSG00000004789	2498.65	-0.0100636	0.0805364	-0.124957	0.900558	0.978879
ENSMUSG00000004791	613.622	0.161284	0.123017	1.31107	0.189835	0.639581
ENSMUSG00000004798	967.592	-0.235335	0.134687	-1.74727	0.0805906	0.466312
ENSMUSG00000004814	201.293	-0.262498	0.245455	-1.06944	0.284874	0.719599
ENSMUSG00000004815	188.563	-0.271348	0.232022	-1.16949	0.242205	0.687639
ENSMUSG00000004837	290.134	0.532604	0.141269	3.77015	0.000163152	0.0201959
ENSMUSG00000004842	0.870809	-0.0295587	1.78289	-0.0165791	0.986772	NA
ENSMUSG00000004843	959.463	0.0455809	0.145519	0.313229	0.754106	0.942485
ENSMUSG00000004846	2329.94	0.0264778	0.10626	0.24918	0.803222	0.955724
ENSMUSG00000004849	1660.73	0.0103238	0.0771913	0.133743	0.893606	0.978223
ENSMUSG00000004864	1293.24	-0.240873	0.207133	-1.16289	0.244874	0.689649
ENSMUSG00000004865	2098.54	0.00675523	0.0760678	0.0888054	0.929237	0.986047
ENSMUSG00000004872	2.39205	1.16707	1.03296	1.12983	0.258547	NA
ENSMUSG00000004880	893.037	-0.0480564	0.109136	-0.440335	0.659695	0.911239
ENSMUSG00000004885	28.7828	-0.203014	0.399732	-0.507876	0.61154	0.891723
ENSMUSG00000004891	2229.07	0.0510315	0.119174	0.42821	0.668498	0.913469
ENSMUSG00000004892	0.700791	0.327696	1.85151	0.176989	0.859517	NA
ENSMUSG00000004894	1.22058	-0.162771	1.53483	-0.106051	0.915542	NA
ENSMUSG00000004895	1260.23	-0.186646	0.0791995	-2.35666	0.0184402	0.254758
ENSMUSG00000004896	544.678	0.00271526	0.115038	0.0236031	0.981169	0.996654
ENSMUSG00000004897	6997.92	0.0903271	0.0593341	1.52235	0.127922	0.561093
ENSMUSG00000004902	7.47586	0.306756	0.552064	0.555653	0.578448	NA
ENSMUSG00000004929	949.945	-0.124547	0.089578	-1.39038	0.164414	0.612586
ENSMUSG00000004931	612.411	-0.238251	0.119842	-1.98805	0.0468067	0.387883
ENSMUSG00000004933	129.083	-0.00218292	0.174181	-0.0125325	0.990001	0.997556
ENSMUSG00000004934	629.907	-0.135728	0.11291	-1.20209	0.229328	0.681253
ENSMUSG00000004936	1560.89	-0.0199698	0.0845347	-0.236232	0.813253	0.957541
ENSMUSG00000004937	2049.31	-0.147204	0.0727254	-2.02411	0.042959	0.374816
ENSMUSG00000004939	7.44833	0.346424	0.580805	0.596455	0.550872	NA
ENSMUSG00000004945	795.031	-0.00467321	0.0916505	-0.0509894	0.959334	0.990631
ENSMUSG00000004947	352.784	-0.26228	0.118156	-2.21978	0.0264337	0.300884
ENSMUSG00000004951	238.88	0.0997846	0.222575	0.448319	0.653923	0.907556
ENSMUSG00000004952	1420.49	-0.119572	0.0994174	-1.20272	0.229084	0.680991
ENSMUSG00000004961	8.07868	-0.828603	0.536931	-1.54322	0.122777	NA
ENSMUSG00000004980	13553.3	0.206027	0.107753	1.91204	0.0558715	0.406916
ENSMUSG00000004988	2.97801	1.53977	1.13797	1.35309	0.176027	NA
ENSMUSG00000004994	198.758	-0.153036	0.123625	-1.2379	0.215753	0.667826
ENSMUSG00000004996	452.669	-0.100523	0.140142	-0.71729	0.473195	0.837023
ENSMUSG00000005034	2431.93	-0.102987	0.0883484	-1.16569	0.243741	0.689278
ENSMUSG00000005043	306.569	-0.00664672	0.106352	-0.0624973	0.950167	0.989158
ENSMUSG00000005045	41.5111	0.233321	0.342852	0.680532	0.496168	0.847489
ENSMUSG00000005054	2228.59	-0.11702	0.0854082	-1.37013	0.170646	0.619328
ENSMUSG00000005057	309.603	-0.307418	0.119105	-2.58106	0.00984964	0.187062
ENSMUSG00000005069	1085.29	-0.0392845	0.0952177	-0.412576	0.679917	0.91799
ENSMUSG00000005078	450.618	0.0395975	0.106068	0.373323	0.708908	0.930504
ENSMUSG00000005087	4943.07	0.0127328	0.113727	0.111959	0.910856	0.982044
ENSMUSG00000005089	0.491565	-0.83698	2.2283	-0.375613	0.707204	NA
ENSMUSG00000005102	597.551	0.024211	0.0931369	0.259951	0.794902	0.953579
ENSMUSG00000005103	5073.59	-0.076459	0.103883	-0.736011	0.461724	0.832419
ENSMUSG00000005107	297.11	-0.12762	0.104443	-1.22191	0.221743	0.673181
ENSMUSG00000005124	645.424	0.594005	0.156612	3.79285	0.000148927	0.0189425
ENSMUSG00000005125	6559.16	-0.0693894	0.141032	-0.492012	0.622711	0.895422
ENSMUSG00000005131	3.57056	-0.0663864	0.782572	-0.084831	0.932396	NA
ENSMUSG00000005142	3330.1	-0.0237592	0.0783944	-0.303073	0.761834	0.944897
ENSMUSG00000005148	653.052	0.0230133	0.144965	0.158751	0.873865	0.972903
ENSMUSG00000005150	439.98	0.143429	0.122409	1.17172	0.241309	0.687361
ENSMUSG00000005161	5878.22	0.00026923	0.1007	0.00267359	0.997867	0.999498
ENSMUSG00000005198	4852.71	-0.00637488	0.128212	-0.0497213	0.960344	0.990741
ENSMUSG00000005204	1792.96	-0.076542	0.0700183	-1.09317	0.274318	0.711878
ENSMUSG00000005220	3.04467	0.105693	0.922661	0.114553	0.9088	NA
ENSMUSG00000005225	263.445	-0.174836	0.121956	-1.4336	0.151687	0.599141
ENSMUSG00000005233	197.833	0.570634	0.16809	3.39482	0.000686736	0.0447737
ENSMUSG00000005237	25.0881	0.353562	0.28716	1.23124	0.218234	0.669676
ENSMUSG00000005251	449.64	-0.27469	0.118217	-2.32361	0.0201466	0.264355
ENSMUSG00000005262	872.216	0.0572129	0.0795162	0.719513	0.471825	0.836471
ENSMUSG00000005267	26.9202	0.035197	0.286582	0.122816	0.902252	0.979625
ENSMUSG00000005268	6.88197	-0.0256658	0.630123	-0.0407314	0.96751	NA
ENSMUSG00000005299	733.746	0.0922781	0.11041	0.835775	0.403281	0.799898
ENSMUSG00000005312	2109.63	-0.0940372	0.0907125	-1.03665	0.299898	0.733944
ENSMUSG00000005320	2.15639	0.916411	0.970296	0.944465	0.344932	NA
ENSMUSG00000005338	18.1489	0.759992	0.448262	1.69542	0.0899957	NA
ENSMUSG00000005339	1.41966	-0.777738	1.44864	-0.536874	0.591354	NA
ENSMUSG00000005354	1475.87	0.0397518	0.0730864	0.543902	0.586509	0.884693
ENSMUSG00000005357	0.798078	0.0757351	2.3561	0.0321443	0.974357	NA
ENSMUSG00000005360	8.92139	0.33321	0.727341	0.458121	0.646865	NA
ENSMUSG00000005362	345.697	-0.0344536	0.102465	-0.336249	0.736683	0.936634
ENSMUSG00000005364	0.51216	1.62529	2.58859	0.62787	0.530089	NA
ENSMUSG00000005370	1004.76	-0.0938632	0.0817275	-1.14849	0.250766	0.693791
ENSMUSG00000005371	1394.8	0.0561845	0.12453	0.451173	0.651865	0.906691
ENSMUSG00000005373	156.658	0.920307	0.468708	1.9635	0.0495882	0.395109
ENSMUSG00000005374	582.202	-0.0223299	0.0945751	-0.236108	0.813349	0.957541
ENSMUSG00000005378	517.619	0.103589	0.0897482	1.15422	0.248411	0.693052
ENSMUSG00000005397	1407.99	0.0771363	0.131677	0.585801	0.558009	0.87431
ENSMUSG00000005410	1618.87	0.201481	0.12164	1.65636	0.0976481	0.503239
ENSMUSG00000005413	1194.64	0.3721	0.21315	1.74572	0.0808595	0.467098
ENSMUSG00000005417	4325.45	-0.0800002	0.0951559	-0.840728	0.4005	0.79882
ENSMUSG00000005442	3280.41	-0.307202	0.122236	-2.51318	0.0119647	0.204829
ENSMUSG00000005447	1253.57	-0.155016	0.0874835	-1.77194	0.0764043	0.458391
ENSMUSG00000005465	42.6112	0.208819	0.315439	0.661996	0.507974	0.852576
ENSMUSG00000005469	1823.79	-0.114674	0.0788812	-1.45375	0.146015	0.592286
ENSMUSG00000005470	323.698	0.113742	0.118519	0.959694	0.337209	0.760916
ENSMUSG00000005474	0.419888	-0.442601	2.72481	-0.162434	0.870964	NA
ENSMUSG00000005481	1633.33	0.0704866	0.0848653	0.83057	0.406217	0.800245
ENSMUSG00000005483	915.875	-0.276581	0.0938297	-2.9477	0.00320152	0.107472
ENSMUSG00000005493	3.75772	-1.00623	0.860069	-1.16994	0.242026	NA
ENSMUSG00000005501	693.185	0.0416256	0.0860734	0.483606	0.628666	0.897521
ENSMUSG00000005503	11.8529	-0.185048	0.526585	-0.351411	0.72528	NA
ENSMUSG00000005505	54.584	-0.333539	0.242609	-1.3748	0.169192	0.61828
ENSMUSG00000005506	2832.15	0.0142491	0.0654759	0.217623	0.827723	0.96086
ENSMUSG00000005510	906.462	-0.0558864	0.0723216	-0.772748	0.439672	0.820379
ENSMUSG00000005514	1546.71	0.0165869	0.112741	0.147124	0.883034	0.974362
ENSMUSG00000005533	3080.16	-0.0829054	0.0858947	-0.965198	0.334446	0.759269
ENSMUSG00000005534	1646.04	-0.0707473	0.0879186	-0.804691	0.420998	0.809127
ENSMUSG00000005540	10.5856	1.60013	0.825625	1.93808	0.0526136	NA
ENSMUSG00000005553	1.35356	-0.800629	1.41025	-0.567722	0.570224	NA
ENSMUSG00000005566	6820.89	-0.149077	0.0745608	-1.99941	0.0455643	0.384014
ENSMUSG00000005575	1746.23	-0.0147779	0.0833364	-0.177328	0.85925	0.968287
ENSMUSG00000005580	52.1159	-0.387559	0.233834	-1.65741	0.0974364	0.503194
ENSMUSG00000005583	374.148	0.123126	0.154638	0.79622	0.425904	0.812485
ENSMUSG00000005609	1470.64	-0.103931	0.0762868	-1.36237	0.173081	0.62311
ENSMUSG00000005610	12681.6	0.00164995	0.127955	0.0128948	0.989712	0.997528
ENSMUSG00000005611	37.9536	0.436081	0.244877	1.78082	0.0749426	0.456206
ENSMUSG00000005615	422.636	-0.124364	0.149398	-0.832436	0.405163	0.800245
ENSMUSG00000005621	767.473	-0.267891	0.106986	-2.50398	0.0122803	0.20662
ENSMUSG00000005625	3116.18	0.0237546	0.0876377	0.271055	0.786349	0.952052
ENSMUSG00000005628	143.68	0.0175163	0.167476	0.10459	0.916701	0.983749
ENSMUSG00000005640	30.0464	0.15109	0.566222	0.266839	0.789593	0.952599
ENSMUSG00000005649	0.705345	-1.68306	2.04139	-0.824467	0.409674	NA
ENSMUSG00000005656	1829.24	0.161227	0.103234	1.56176	0.118344	0.540707
ENSMUSG00000005667	312.811	0.32135	0.144119	2.22976	0.0257633	0.29691
ENSMUSG00000005672	292.548	0.0497641	0.161065	0.30897	0.757344	0.942909
ENSMUSG00000005674	106.932	-0.0059058	0.191634	-0.0308182	0.975415	0.994715
ENSMUSG00000005677	0.833701	1.81738	2.21867	0.819129	0.412713	NA
ENSMUSG00000005681	3.51413	-0.683328	0.866051	-0.789016	0.430103	NA
ENSMUSG00000005682	1181.89	-0.140581	0.0987083	-1.42421	0.154386	0.601747
ENSMUSG00000005683	3168.62	-0.179519	0.0774541	-2.31775	0.0204628	0.265634
ENSMUSG00000005686	455.083	0.00572709	0.126219	0.0453742	0.963809	0.991153
ENSMUSG00000005687	1381.44	0.110114	0.0988513	1.11394	0.265307	0.705843
ENSMUSG00000005696	3.83963	-0.209917	0.937313	-0.223956	0.822791	NA
ENSMUSG00000005698	1311.47	-0.0163218	0.0869986	-0.18761	0.851183	0.966311
ENSMUSG00000005699	102.238	-0.0954927	0.160639	-0.594457	0.552206	0.871404
ENSMUSG00000005705	8.75444	0.129026	0.481057	0.268215	0.788534	NA
ENSMUSG00000005716	465.901	1.44252	0.656487	2.19734	0.0279964	0.30903
ENSMUSG00000005718	508.645	-0.10915	0.137634	-0.793045	0.427752	0.813005
ENSMUSG00000005732	931.067	0.293338	0.154017	1.90458	0.0568343	0.410484
ENSMUSG00000005763	18.5742	0.957225	0.492629	1.9431	0.0520046	NA
ENSMUSG00000005774	236.855	-0.0707883	0.165775	-0.427015	0.669369	0.913469
ENSMUSG00000005779	4099.82	0.0641786	0.0753739	0.85147	0.394509	0.794821
ENSMUSG00000005800	87.0757	0.355016	0.337256	1.05266	0.292496	0.726912
ENSMUSG00000005802	1025.03	0.121519	0.146961	0.826882	0.408304	0.800718
ENSMUSG00000005803	173.219	0.195781	0.178827	1.0948	0.273602	0.711817
ENSMUSG00000005804	810.075	0.053334	0.0913296	0.583973	0.559239	0.874516
ENSMUSG00000005813	1250.58	-0.166064	0.0789951	-2.10221	0.0355351	0.345968
ENSMUSG00000005823	817.468	-0.0309794	0.087478	-0.35414	0.723234	0.932856
ENSMUSG00000005824	41.7088	-0.223285	0.268337	-0.832107	0.405349	0.800245
ENSMUSG00000005836	3.84495	-1.06067	0.818328	-1.29614	0.194926	NA
ENSMUSG00000005846	2108.01	0.036701	0.100931	0.363626	0.716137	0.932014
ENSMUSG00000005864	0.728949	0.951277	2.00954	0.473381	0.635942	NA
ENSMUSG00000005871	918.139	-0.174224	0.121081	-1.4389	0.150179	0.597783
ENSMUSG00000005873	1872.36	0.0824899	0.0719217	1.14694	0.251406	0.694184
ENSMUSG00000005881	2434.6	-0.0338932	0.0677907	-0.499968	0.617098	0.89464
ENSMUSG00000005882	410.66	-0.0155685	0.0984951	-0.158064	0.874406	0.972903
ENSMUSG00000005883	62.741	-0.0500156	0.326298	-0.153282	0.878176	0.973844
ENSMUSG00000005886	832.076	-0.206293	0.102581	-2.01102	0.0443236	0.379546
ENSMUSG00000005893	330.805	-0.342827	0.183261	-1.8707	0.0613865	0.424072
ENSMUSG00000005897	462.383	-0.185955	0.130412	-1.4259	0.153896	0.601747
ENSMUSG00000005899	761.097	0.00838596	0.0838498	0.100012	0.920335	0.985001
ENSMUSG00000005907	156.538	0.159446	0.139398	1.14382	0.252698	0.695477
ENSMUSG00000005917	36.7497	0.188107	0.277532	0.677785	0.497908	0.847826
ENSMUSG00000005936	1659.88	-0.0353335	0.0694549	-0.508725	0.610945	0.891723
ENSMUSG00000005947	55.3212	-0.798282	0.227877	-3.50313	0.000459829	0.0343386
ENSMUSG00000005949	416.482	0.00248211	0.0920803	0.026956	0.978495	0.996069
ENSMUSG00000005950	10.509	0.275762	0.475833	0.579534	0.562229	NA
ENSMUSG00000005951	57.2099	0.0884687	0.257355	0.343761	0.731026	0.934426
ENSMUSG00000005952	0.694011	1.41816	2.13341	0.664736	0.50622	NA
ENSMUSG00000005958	350.974	0.233043	0.123185	1.89182	0.0585151	0.416027
ENSMUSG00000005968	384.736	-0.0604632	0.13605	-0.444418	0.65674	0.909232
ENSMUSG00000005973	3272.95	0.0116029	0.0877629	0.132207	0.89482	0.978525
ENSMUSG00000005980	58.4399	-0.0681941	0.205339	-0.332105	0.73981	0.937469
ENSMUSG00000005981	1692.28	0.0334849	0.0777101	0.430895	0.666545	0.913263
ENSMUSG00000005982	470.298	-0.11042	0.158811	-0.695292	0.486872	0.842426
ENSMUSG00000005983	45.898	0.0852001	0.245723	0.346732	0.728793	0.934033
ENSMUSG00000005986	148.43	-0.0018677	0.129564	-0.0144152	0.988499	0.997528
ENSMUSG00000006005	3810.14	-0.091131	0.0946645	-0.962674	0.335711	0.759552
ENSMUSG00000006010	488.69	0.131657	0.10545	1.24852	0.21184	0.664983
ENSMUSG00000006014	60.2283	-0.029433	0.657101	-0.0447922	0.964273	0.991153
ENSMUSG00000006019	442.982	-0.0592156	0.114544	-0.516969	0.605178	0.889676
ENSMUSG00000006021	187.255	0.154472	0.118074	1.30826	0.190784	0.640597
ENSMUSG00000006024	1910.4	-0.0696402	0.0838269	-0.830762	0.406108	0.800245
ENSMUSG00000006050	666.235	0.0216312	0.0926335	0.233514	0.815363	0.958713
ENSMUSG00000006057	1171.72	-0.0348933	0.117039	-0.298133	0.765602	0.946585
ENSMUSG00000006058	814.696	0.0502347	0.0871369	0.576504	0.564275	0.87656
ENSMUSG00000006095	577.668	-0.0347747	0.0885155	-0.392866	0.694419	0.923157
ENSMUSG00000006127	1099.08	-0.0675637	0.0864412	-0.781615	0.434441	0.818113
ENSMUSG00000006134	1080.44	-0.284367	0.0926152	-3.07041	0.00213762	0.085653
ENSMUSG00000006143	7.9859	0.476958	0.531735	0.896986	0.369726	NA
ENSMUSG00000006154	28.3964	0.239251	0.540176	0.442913	0.657829	0.91007
ENSMUSG00000006169	1926.3	-0.161352	0.0981911	-1.64325	0.100331	0.509576
ENSMUSG00000006179	182.144	0.146213	0.147836	0.98902	0.322653	0.750047
ENSMUSG00000006191	194.501	-0.00408281	0.131188	-0.0311218	0.975172	0.99471
ENSMUSG00000006204	1.02604	-0.382172	1.53807	-0.248475	0.803767	NA
ENSMUSG00000006205	3484.8	0.0870199	0.134784	0.645627	0.518521	0.857285
ENSMUSG00000006215	695.88	-0.0522748	0.108381	-0.482323	0.629577	0.898053
ENSMUSG00000006218	50.485	0.213681	0.260717	0.819588	0.412451	0.80267
ENSMUSG00000006219	1902.72	-0.127339	0.114341	-1.11368	0.265417	0.705843
ENSMUSG00000006221	251.515	0.928401	0.506102	1.83441	0.0665925	0.436244
ENSMUSG00000006235	19.2406	0.0686581	0.319608	0.21482	0.829908	NA
ENSMUSG00000006241	88.7766	-0.116795	0.207029	-0.564149	0.572652	0.879501
ENSMUSG00000006262	854.396	-0.0102854	0.15292	-0.06726	0.946375	0.989056
ENSMUSG00000006269	261.62	0.58683	0.650878	0.901597	0.367271	0.780955
ENSMUSG00000006273	2387.33	-0.0440631	0.126062	-0.349535	0.726688	0.933205
ENSMUSG00000006276	1551.74	-0.0490992	0.0812949	-0.603964	0.545867	0.869
ENSMUSG00000006281	1198.99	0.114155	0.0967239	1.18021	0.237916	0.685739
ENSMUSG00000006288	802.575	-0.00380824	0.0976454	-0.0390007	0.96889	0.992588
ENSMUSG00000006289	546.628	0.0527658	0.120572	0.437631	0.661654	0.911484
ENSMUSG00000006299	2529.72	-0.0351834	0.0899198	-0.391275	0.695594	0.923685
ENSMUSG00000006301	1779.72	-0.000694904	0.0696711	-0.00997407	0.992042	0.997985
ENSMUSG00000006304	5518.89	0.104129	0.0939971	1.10779	0.267954	0.707827
ENSMUSG00000006307	1524.37	-0.17719	0.101579	-1.74436	0.0810955	0.467143
ENSMUSG00000006310	34.2509	-0.384637	0.337039	-1.14122	0.253777	0.696836
ENSMUSG00000006313	38.479	-0.138916	0.28989	-0.479202	0.631795	0.899548
ENSMUSG00000006315	698.231	-0.0282591	0.107402	-0.263115	0.792462	0.953102
ENSMUSG00000006333	27860.5	0.0121784	0.135902	0.0896113	0.928596	0.985838
ENSMUSG00000006335	260.976	-0.0366479	0.146252	-0.25058	0.802139	0.95541
ENSMUSG00000006342	58.8061	0.0922933	0.245764	0.375537	0.707261	0.929451
ENSMUSG00000006344	188.419	0.361473	0.192493	1.87786	0.0604009	0.422285
ENSMUSG00000006345	57.6222	0.887481	0.427451	2.07622	0.0378737	0.355987
ENSMUSG00000006356	503.859	0.250201	0.128168	1.95213	0.0509228	0.396878
ENSMUSG00000006360	2935.95	0.0671956	0.131048	0.512757	0.608121	0.891304
ENSMUSG00000006362	132.042	-0.196751	0.186178	-1.05679	0.290608	0.725358
ENSMUSG00000006369	201.604	0.425938	0.197862	2.1527	0.031342	0.325343
ENSMUSG00000006373	1172.76	0.142642	0.127386	1.11976	0.262814	0.704475
ENSMUSG00000006378	144.886	0.0461009	0.208908	0.220676	0.825345	0.960619
ENSMUSG00000006386	110.958	0.0661244	0.214235	0.308653	0.757586	0.942909
ENSMUSG00000006389	0.797185	-0.440111	1.82858	-0.240684	0.8098	NA
ENSMUSG00000006390	850.825	-0.0214348	0.0847043	-0.253054	0.800226	0.95514
ENSMUSG00000006392	453.116	0.0648897	0.0907342	0.715163	0.474509	0.837186
ENSMUSG00000006395	338.404	-0.0210027	0.137785	-0.152431	0.878847	0.973844
ENSMUSG00000006398	1007.32	0.131275	0.119846	1.09536	0.273358	0.711817
ENSMUSG00000006403	659.097	0.0376973	0.125551	0.300255	0.763983	0.945656
ENSMUSG00000006411	249.474	0.129341	0.429273	0.301302	0.763184	0.945304
ENSMUSG00000006412	1002.99	0.0840941	0.132117	0.636514	0.524441	0.860151
ENSMUSG00000006418	1591.07	-0.20649	0.113835	-1.81393	0.0696877	0.444405
ENSMUSG00000006423	553.036	0.0401132	0.101453	0.395389	0.692556	0.922961
ENSMUSG00000006435	293.156	-0.260505	0.132805	-1.96157	0.0498125	0.395702
ENSMUSG00000006442	1331.99	-0.0527249	0.0815532	-0.646509	0.51795	0.856976
ENSMUSG00000006445	2689.83	-0.254119	0.122726	-2.07063	0.0383938	0.358687
ENSMUSG00000006456	629.873	-0.205678	0.090012	-2.28501	0.0223125	0.275358
ENSMUSG00000006457	1274.69	0.832071	0.478565	1.73868	0.0820911	0.468358
ENSMUSG00000006462	10.2962	-0.11411	0.451249	-0.252876	0.800364	NA
ENSMUSG00000006463	237.466	-0.060473	0.11412	-0.529908	0.596176	0.887491
ENSMUSG00000006464	139.439	-0.118474	0.156871	-0.755236	0.450108	0.826482
ENSMUSG00000006471	133.873	-0.21183	0.170135	-1.24507	0.213105	0.665186
ENSMUSG00000006476	3082.27	-0.397897	0.17134	-2.32227	0.0202186	0.264355
ENSMUSG00000006494	921.726	-0.0195528	0.100325	-0.194896	0.845474	0.965381
ENSMUSG00000006498	4504.63	-0.163927	0.121015	-1.3546	0.175544	0.625803
ENSMUSG00000006517	353.027	0.139656	0.110052	1.26901	0.204439	0.655752
ENSMUSG00000006519	2869.89	0.175723	0.0893575	1.96651	0.0492396	0.393917
ENSMUSG00000006522	1.71892	0.508025	1.27577	0.398211	0.690475	NA
ENSMUSG00000006526	332.954	-0.0356988	0.106559	-0.335015	0.737613	0.936634
ENSMUSG00000006527	352.294	0.0277655	0.109	0.25473	0.798932	0.95514
ENSMUSG00000006538	2.98621	-0.752291	0.801637	-0.938443	0.348017	NA
ENSMUSG00000006542	20.2892	0.560087	0.442476	1.2658	0.205584	NA
ENSMUSG00000006546	0.217809	-0.166894	3.16075	-0.0528022	0.95789	NA
ENSMUSG00000006567	3.71838	0.250643	0.876846	0.285846	0.774996	NA
ENSMUSG00000006574	4.97144	1.40336	1.10642	1.26838	0.204662	NA
ENSMUSG00000006575	55.7272	0.278035	0.223321	1.245	0.213132	0.665186
ENSMUSG00000006576	395.575	-0.108263	0.146842	-0.737275	0.460955	0.83204
ENSMUSG00000006585	1118.39	0.172796	0.106548	1.62178	0.104851	0.516858
ENSMUSG00000006586	9.42284	0.552962	0.638201	0.866439	0.38625	NA
ENSMUSG00000006589	3777.06	0.0434681	0.075455	0.576079	0.564562	0.87656
ENSMUSG00000006599	858.96	0.0192031	0.0748958	0.256398	0.797643	0.95514
ENSMUSG00000006611	533.683	-0.0943998	0.115399	-0.818031	0.413339	0.803722
ENSMUSG00000006638	7.49629	0.409245	0.599022	0.683189	0.494487	NA
ENSMUSG00000006641	128.017	0.0609968	0.172171	0.354281	0.723128	0.932856
ENSMUSG00000006651	94.1192	-0.0804127	0.197482	-0.407189	0.683869	0.919838
ENSMUSG00000006673	1677.08	-0.0780791	0.0785379	-0.994158	0.320146	0.747084
ENSMUSG00000006675	18.8814	0.29696	0.315027	0.942651	0.345859	NA
ENSMUSG00000006676	3541.12	-0.109827	0.094437	-1.16296	0.244844	0.689649
ENSMUSG00000006678	556.293	0.230643	0.109875	2.09913	0.0358053	0.347216
ENSMUSG00000006699	6248.12	0.099278	0.0927806	1.07003	0.284606	0.719599
ENSMUSG00000006705	370.647	-0.169316	0.124867	-1.35597	0.17511	0.625217
ENSMUSG00000006711	1.44496	0.696043	1.2751	0.545873	0.585153	NA
ENSMUSG00000006715	276.74	0.339554	0.145352	2.33609	0.0194866	0.260249
ENSMUSG00000006717	280.235	-0.106403	0.124506	-0.854605	0.39277	0.79447
ENSMUSG00000006720	76.5548	-0.116283	0.197703	-0.588172	0.556417	0.873057
ENSMUSG00000006724	11.9429	-0.0595243	0.483507	-0.12311	0.90202	NA
ENSMUSG00000006728	6601.71	-0.0978293	0.07303	-1.33958	0.180383	0.630092
ENSMUSG00000006731	1888.01	-0.229929	0.117543	-1.95613	0.0504503	0.395702
ENSMUSG00000006732	545.163	0.0211298	0.100617	0.210001	0.833667	0.961167
ENSMUSG00000006736	885.238	0.00147502	0.0865341	0.0170455	0.9864	0.997528
ENSMUSG00000006740	1616.07	-0.155337	0.110541	-1.40524	0.15995	0.606991
ENSMUSG00000006763	342.223	0.0222874	0.101173	0.220289	0.825646	0.960619
ENSMUSG00000006764	0.766959	0.155077	2.37707	0.0652385	0.947984	NA
ENSMUSG00000006777	19.4812	-0.0624809	0.466778	-0.133856	0.893517	NA
ENSMUSG00000006782	875.449	-0.15252	0.116576	-1.30833	0.19076	0.640597
ENSMUSG00000006784	13.0809	-0.0436407	0.394864	-0.110521	0.911996	NA
ENSMUSG00000006800	1530.84	0.177894	0.117956	1.50814	0.13152	0.567953
ENSMUSG00000006818	1142.5	0.0521345	0.099623	0.523317	0.600753	0.887842
ENSMUSG00000006850	163.172	0.260941	0.148607	1.75591	0.0791034	0.464998
ENSMUSG00000006906	329.171	-0.105625	0.12633	-0.836107	0.403095	0.799898
ENSMUSG00000006920	865.38	-0.117478	0.127215	-0.923466	0.355765	0.776543
ENSMUSG00000006930	814.372	-0.175586	0.196178	-0.895036	0.370768	0.783094
ENSMUSG00000006931	283.769	0.0301573	0.127717	0.236126	0.813335	0.957541
ENSMUSG00000006932	10147.3	-0.152432	0.111065	-1.37247	0.169918	0.619279
ENSMUSG00000006941	637.143	-0.0516596	0.108869	-0.47451	0.635136	0.900614
ENSMUSG00000006948	1.904	0.692432	1.12011	0.618183	0.536455	NA
ENSMUSG00000006958	29.5925	0.346657	0.351827	0.985303	0.324475	0.752003
ENSMUSG00000006998	4538.06	-0.0057937	0.0660123	-0.087767	0.930062	0.986215
ENSMUSG00000007021	6.70522	0.630069	0.650285	0.968912	0.332589	NA
ENSMUSG00000007029	7060.18	-0.0805951	0.112518	-0.716286	0.473815	0.837186
ENSMUSG00000007030	146.442	-0.198124	0.24135	-0.8209	0.411703	0.802477
ENSMUSG00000007033	9.41686	-0.932516	0.542061	-1.72032	0.0853749	NA
ENSMUSG00000007034	7.86688	-0.161379	0.641693	-0.251489	0.801436	NA
ENSMUSG00000007035	172.983	0.202224	0.157986	1.28001	0.200541	0.652807
ENSMUSG00000007036	1042.55	-0.0495023	0.082514	-0.599927	0.548555	0.870214
ENSMUSG00000007038	677.408	0.0674028	0.121949	0.552713	0.58046	0.881943
ENSMUSG00000007039	2267.7	-0.209225	0.0853465	-2.45148	0.0142271	0.22412
ENSMUSG00000007041	7648.38	-0.0399394	0.0843625	-0.473426	0.635909	0.900812
ENSMUSG00000007050	644.961	0.0757538	0.101848	0.74379	0.457003	0.831264
ENSMUSG00000007080	482.326	0.303815	0.138261	2.19741	0.0279915	0.30903
ENSMUSG00000007097	333.406	0.552901	0.274295	2.01572	0.0438294	0.37861
ENSMUSG00000007107	2.14944	-1.02689	1.28419	-0.799643	0.423918	NA
ENSMUSG00000007122	164.733	1.16321	0.520457	2.23497	0.0254191	0.295737
ENSMUSG00000007207	903.744	-0.149724	0.142589	-1.05004	0.293698	0.727631
ENSMUSG00000007216	99.6559	-0.0617851	0.21974	-0.281174	0.778577	0.949772
ENSMUSG00000007279	1.32598	-0.552093	1.18755	-0.464899	0.642004	NA
ENSMUSG00000007338	634.662	-0.0663127	0.0925597	-0.716432	0.473725	0.837186
ENSMUSG00000007379	91.0562	-0.00299462	0.168731	-0.017748	0.98584	0.997528
ENSMUSG00000007411	1448.24	-0.144396	0.0701735	-2.0577	0.0396189	0.362559
ENSMUSG00000007415	1175.51	-0.0834755	0.102043	-0.818043	0.413333	0.803722
ENSMUSG00000007458	2204.06	0.0688297	0.0717984	0.958652	0.337734	0.760986
ENSMUSG00000007476	287.07	-0.0328741	0.0999803	-0.328806	0.742302	0.937959
ENSMUSG00000007480	3.90367	0.302696	0.79852	0.379071	0.704635	NA
ENSMUSG00000007564	6593.42	-0.0795529	0.0906553	-0.877532	0.380198	0.787149
ENSMUSG00000007570	579.471	-0.122239	0.110354	-1.10769	0.267994	0.707827
ENSMUSG00000007589	295.646	0.225833	0.103792	2.17583	0.0295681	0.316503
ENSMUSG00000007591	22.5703	0.596173	0.321228	1.85592	0.0634647	0.429836
ENSMUSG00000007594	31.7517	-0.370307	0.344263	-1.07565	0.282082	0.717751
ENSMUSG00000007603	984.856	-0.0173701	0.111578	-0.155676	0.876288	0.973438
ENSMUSG00000007610	790.672	-0.148992	0.0905018	-1.64629	0.0997034	0.508381
ENSMUSG00000007613	1979.17	0.268251	0.164065	1.63503	0.102043	0.512582
ENSMUSG00000007617	450.157	-0.308403	0.157443	-1.95882	0.0501335	0.395702
ENSMUSG00000007646	99.4326	0.205406	0.162486	1.26415	0.206176	0.657562
ENSMUSG00000007655	1259.9	0.319562	0.176087	1.81479	0.0695555	0.443977
ENSMUSG00000007656	1685.64	-0.0592374	0.112646	-0.525872	0.598977	0.887701
ENSMUSG00000007659	1252.84	0.00930709	0.0965017	0.0964449	0.923167	0.985053
ENSMUSG00000007670	3766.26	-0.0483648	0.0968626	-0.499314	0.617558	0.894832
ENSMUSG00000007682	729.754	-0.131784	0.332389	-0.396475	0.691755	0.922961
ENSMUSG00000007721	648.35	0.071333	0.100367	0.710721	0.477257	0.837401
ENSMUSG00000007739	5774.39	0.122128	0.101015	1.20901	0.226659	0.677388
ENSMUSG00000007777	184.166	-0.0394054	0.162077	-0.243128	0.807906	0.956042
ENSMUSG00000007783	151.615	0.358462	0.193908	1.84862	0.0645122	0.432076
ENSMUSG00000007805	14.7424	0.689651	0.501411	1.37542	0.169002	NA
ENSMUSG00000007812	617.675	0.0823574	0.105253	0.78247	0.433938	0.81805
ENSMUSG00000007815	5197	0.0115223	0.0790551	0.14575	0.884119	0.974444
ENSMUSG00000007817	2760.37	0.00181907	0.135502	0.0134246	0.989289	0.997528
ENSMUSG00000007827	264.384	-0.160636	0.106856	-1.50329	0.132765	0.570216
ENSMUSG00000007833	635.096	0.0482971	0.0939376	0.514141	0.607154	0.890655
ENSMUSG00000007836	5856.55	-0.0182995	0.0664662	-0.275321	0.78307	0.950704
ENSMUSG00000007837	359.516	-0.0171863	0.107726	-0.159538	0.873245	0.972788
ENSMUSG00000007850	8585.96	0.151142	0.0835104	1.80986	0.0703177	0.445764
ENSMUSG00000007867	611.845	0.0688504	0.107208	0.642214	0.520735	0.858132
ENSMUSG00000007872	2043.98	-0.530358	0.118778	-4.46514	8.00179e-06	0.00308158
ENSMUSG00000007877	371.319	0.701896	0.415247	1.69031	0.0909686	0.490353
ENSMUSG00000007880	2485.39	-0.251687	0.0956062	-2.63254	0.00847499	0.17416
ENSMUSG00000007888	1625.68	-0.180268	0.149723	-1.20401	0.228584	0.680484
ENSMUSG00000007891	7725.2	0.156452	0.139263	1.12342	0.261258	0.704136
ENSMUSG00000007892	24983.9	-0.0235952	0.133942	-0.176159	0.860169	0.968361
ENSMUSG00000007908	2.37832	0.32304	0.851257	0.379486	0.704327	NA
ENSMUSG00000007944	1.16252	-2.41574	1.59516	-1.51441	0.129921	NA
ENSMUSG00000007946	6.28062	0.365991	0.54034	0.677335	0.498193	NA
ENSMUSG00000007950	910.093	-0.161123	0.107145	-1.50379	0.132637	0.570177
ENSMUSG00000007987	373.639	-0.00453881	0.0929985	-0.0488052	0.961074	0.991041
ENSMUSG00000007989	144.846	-0.547118	0.19139	-2.85865	0.00425442	0.122372
ENSMUSG00000008028	1.35165	1.99858	1.37592	1.45254	0.146352	NA
ENSMUSG00000008035	239.624	0.0533828	0.135198	0.39485	0.692953	0.922961
ENSMUSG00000008036	1740.15	0.0670233	0.0737337	0.908991	0.363355	0.780217
ENSMUSG00000008090	763.292	-0.120853	0.128442	-0.940917	0.346748	0.769662
ENSMUSG00000008129	68.159	-0.0656276	0.219187	-0.299414	0.764624	0.946073
ENSMUSG00000008136	1541.41	-0.135433	0.0881125	-1.53704	0.124283	0.55456
ENSMUSG00000008140	2414.01	-0.159308	0.0990329	-1.60864	0.107695	0.521148
ENSMUSG00000008153	6.28368	0.420161	0.566479	0.741707	0.458265	NA
ENSMUSG00000008167	523.2	0.0482423	0.121448	0.397225	0.691202	0.922961
ENSMUSG00000008193	16.694	-0.154901	0.676044	-0.229129	0.818768	NA
ENSMUSG00000008200	1742.4	0.0274884	0.0911421	0.301599	0.762958	0.945192
ENSMUSG00000008206	65.9486	0.350436	0.197493	1.77442	0.0759934	0.457888
ENSMUSG00000008226	133.061	0.0978255	0.126882	0.770995	0.44071	0.821016
ENSMUSG00000008301	832.224	-0.0171733	0.0996518	-0.172333	0.863175	0.969433
ENSMUSG00000008305	719.896	-0.117484	0.112899	-1.04061	0.298056	0.731855
ENSMUSG00000008307	41.8558	0.0754786	0.259263	0.291128	0.770954	0.947993
ENSMUSG00000008318	163.027	-0.172125	0.132309	-1.30092	0.193284	0.643297
ENSMUSG00000008333	895.303	0.207106	0.124685	1.66103	0.0967066	0.501774
ENSMUSG00000008348	845.445	0.24296	0.184254	1.31862	0.187297	0.636712
ENSMUSG00000008373	818.722	0.00879279	0.100325	0.087643	0.93016	0.986215
ENSMUSG00000008384	497.917	0.0103427	0.103415	0.100012	0.920335	0.985001
ENSMUSG00000008393	1910.02	-0.125472	0.0702629	-1.78575	0.0741397	0.455016
ENSMUSG00000008398	2429.64	-0.0650932	0.0692602	-0.939835	0.347302	0.770366
ENSMUSG00000008429	839.736	-0.0472517	0.10598	-0.445854	0.655703	0.908592
ENSMUSG00000008435	231.003	0.0587457	0.126917	0.462866	0.643461	0.902837
ENSMUSG00000008438	2.05934	0.034159	1.09208	0.0312787	0.975047	NA
ENSMUSG00000008450	599.882	-0.045264	0.104053	-0.435008	0.663556	0.912035
ENSMUSG00000008461	1.52979	0.164709	1.27938	0.128741	0.897562	NA
ENSMUSG00000008475	3517.73	0.0254577	0.10117	0.251634	0.801324	0.95525
ENSMUSG00000008482	11.7141	-0.0748676	0.53156	-0.140845	0.887992	NA
ENSMUSG00000008496	159.803	0.0190402	0.214372	0.0888182	0.929226	0.986047
ENSMUSG00000008540	540.178	0.355635	0.237385	1.49813	0.134098	0.572412
ENSMUSG00000008575	4158.01	0.167967	0.118582	1.41646	0.15664	0.602323
ENSMUSG00000008601	463.249	-0.168422	0.525311	-0.320615	0.748502	0.940345
ENSMUSG00000008604	2217.85	-0.14139	0.0664399	-2.12809	0.0333292	0.336056
ENSMUSG00000008658	34.4838	0.115588	0.409923	0.281974	0.777963	0.949531
ENSMUSG00000008668	12659.3	0.112438	0.127901	0.879105	0.379344	0.787074
ENSMUSG00000008682	17454.3	-0.0435843	0.105732	-0.412214	0.680182	0.917994
ENSMUSG00000008683	9968.68	0.143899	0.130907	1.09924	0.271663	0.710982
ENSMUSG00000008690	2061.28	-0.0580346	0.073038	-0.79458	0.426858	0.813005
ENSMUSG00000008730	2133.77	-0.157818	0.0860429	-1.83418	0.0666279	0.436244
ENSMUSG00000008734	359.705	-0.119796	0.196737	-0.608913	0.542582	0.867932
ENSMUSG00000008763	1733.13	-0.157478	0.0988252	-1.5935	0.111048	0.526707
ENSMUSG00000008822	93.7046	0.145675	0.182134	0.799827	0.423811	0.811038
ENSMUSG00000008845	153.036	0.737326	0.216451	3.40643	0.000658195	0.0434534
ENSMUSG00000008855	1585.37	0.0115645	0.11026	0.104884	0.916468	0.983749
ENSMUSG00000008859	1122.29	-0.0454713	0.0989328	-0.459618	0.64579	0.904094
ENSMUSG00000008892	2221.91	0.122574	0.0985245	1.2441	0.213463	0.665186
ENSMUSG00000008932	1.68058	0.552663	1.24966	0.442252	0.658307	NA
ENSMUSG00000008958	1211.17	-0.154444	0.0925493	-1.66878	0.095162	0.497859
ENSMUSG00000008976	785.021	-0.0562015	0.102057	-0.550686	0.581849	0.881961
ENSMUSG00000008999	736.29	-0.403041	0.183384	-2.1978	0.0279636	0.30903
ENSMUSG00000009013	2856.62	-0.110044	0.104988	-1.04816	0.294566	0.728339
ENSMUSG00000009030	515.747	-0.0385193	0.137418	-0.280308	0.779241	0.949772
ENSMUSG00000009035	1435.23	-0.0633462	0.104313	-0.607271	0.543671	0.868071
ENSMUSG00000009073	2716.74	-0.0793082	0.0872611	-0.908861	0.363423	0.780217
ENSMUSG00000009075	1.04669	-0.79119	1.94812	-0.40613	0.684647	NA
ENSMUSG00000009076	91.3861	-0.0414528	0.189609	-0.218623	0.826944	0.96068
ENSMUSG00000009079	6127.44	0.116914	0.101817	1.14828	0.250852	0.693791
ENSMUSG00000009090	1926.52	-0.155365	0.109669	-1.41667	0.156578	0.602323
ENSMUSG00000009092	14.205	-0.343269	0.420651	-0.816043	0.414476	NA
ENSMUSG00000009093	0.888099	2.15047	1.71877	1.25117	0.210871	NA
ENSMUSG00000009097	69.8845	-0.172815	0.277845	-0.621982	0.533954	0.863375
ENSMUSG00000009108	35.0935	0.375299	0.402614	0.932156	0.351256	0.773573
ENSMUSG00000009112	588.426	-0.158205	0.103519	-1.52827	0.126445	0.559341
ENSMUSG00000009114	0.469476	0.238954	2.64292	0.090413	0.927959	NA
ENSMUSG00000009115	0.314284	0.868186	3.14606	0.27596	0.782579	NA
ENSMUSG00000009145	185.553	0.0718202	0.181831	0.394984	0.692855	0.922961
ENSMUSG00000009185	297.573	0.565268	0.415396	1.36079	0.173579	0.623446
ENSMUSG00000009207	265.374	0.0542081	0.171695	0.315723	0.752213	0.941687
ENSMUSG00000009210	3.94696	0.859045	0.919828	0.933919	0.350346	NA
ENSMUSG00000009214	3.72888	0.622421	0.73652	0.845083	0.398064	NA
ENSMUSG00000009246	14.8421	-0.104637	0.398729	-0.262427	0.792993	NA
ENSMUSG00000009248	4.64023	-0.0968713	0.727043	-0.13324	0.894003	NA
ENSMUSG00000009281	77.7556	0.107298	0.216628	0.495309	0.620382	0.895272
ENSMUSG00000009291	3998.18	-0.1463	0.0760767	-1.92306	0.0544729	0.405497
ENSMUSG00000009292	173.019	0.833995	0.153248	5.44211	5.26536e-08	9.12487e-05
ENSMUSG00000009293	841.737	-0.168852	0.0750132	-2.25096	0.0243879	0.289361
ENSMUSG00000009350	105.393	0.543534	0.968177	0.561399	0.574525	0.880215
ENSMUSG00000009376	963.058	-0.0521462	0.113551	-0.459233	0.646067	0.904206
ENSMUSG00000009378	14.6737	-0.0104082	0.446488	-0.0233113	0.981402	NA
ENSMUSG00000009394	7.21817	0.512575	0.700679	0.73154	0.464449	NA
ENSMUSG00000009406	297.333	-0.119362	0.137955	-0.865223	0.386916	0.791534
ENSMUSG00000009418	4388.86	-0.0335673	0.119824	-0.280138	0.779371	0.949772
ENSMUSG00000009470	2660.91	0.0536462	0.155527	0.344931	0.730146	0.934426
ENSMUSG00000009471	17.9031	-0.144674	0.654564	-0.221024	0.825074	NA
ENSMUSG00000009487	1.05868	-0.808723	1.66841	-0.484726	0.62787	NA
ENSMUSG00000009535	717.787	0.0685083	0.0819714	0.835759	0.403291	0.799898
ENSMUSG00000009545	91.6982	0.436431	0.185611	2.35133	0.0187066	0.257034
ENSMUSG00000009549	1136.5	0.134755	0.0983927	1.36957	0.170823	0.619355
ENSMUSG00000009551	3.19258	0.708038	1.05544	0.670845	0.502319	NA
ENSMUSG00000009555	1839.72	0.0539073	0.079376	0.679139	0.49705	0.847575
ENSMUSG00000009563	308.688	-0.0982369	0.114533	-0.857717	0.391049	0.793764
ENSMUSG00000009566	610.981	-0.208222	0.10267	-2.02806	0.0425543	0.37368
ENSMUSG00000009569	612.193	-0.0997862	0.111631	-0.893891	0.37138	0.783447
ENSMUSG00000009575	2389.86	0.0428718	0.0824056	0.520254	0.602887	0.888933
ENSMUSG00000009580	0.431821	2.22937	2.64141	0.844005	0.398666	NA
ENSMUSG00000009585	884.069	-0.171956	0.0842791	-2.04031	0.0413192	0.370057
ENSMUSG00000009596	0.964252	-1.39865	1.77517	-0.787897	0.430757	NA
ENSMUSG00000009614	215.774	0.0419462	0.159664	0.262715	0.79277	0.953102
ENSMUSG00000009621	585.375	-0.08435	0.0851419	-0.990699	0.321832	0.74898
ENSMUSG00000009630	2106.92	-0.251112	0.0653465	-3.84277	0.000121653	0.0175686
ENSMUSG00000009633	59.9151	0.191593	0.334796	0.572267	0.567141	0.877898
ENSMUSG00000009640	485.497	-0.0773073	0.120289	-0.642679	0.520433	0.858132
ENSMUSG00000009647	437.709	-0.0556811	0.116132	-0.479462	0.63161	0.899408
ENSMUSG00000009654	11.7837	0.530513	0.420507	1.2616	0.207091	NA
ENSMUSG00000009670	0.274052	-1.32104	3.16075	-0.417951	0.675983	NA
ENSMUSG00000009681	2491.33	-0.188739	0.0914943	-2.06285	0.0391271	0.36148
ENSMUSG00000009687	2323.88	0.0858883	0.0832661	1.03149	0.302311	0.73582
ENSMUSG00000009731	18.4479	-0.456672	0.382808	-1.19295	0.232887	NA
ENSMUSG00000009733	333.138	-0.177579	0.103942	-1.70845	0.0875526	0.481624
ENSMUSG00000009739	620.153	-0.197525	0.104145	-1.89664	0.057875	0.413698
ENSMUSG00000009741	1552.38	-0.0880305	0.105561	-0.833933	0.404319	0.800144
ENSMUSG00000009772	669.999	-0.0805522	0.101443	-0.794063	0.427159	0.813005
ENSMUSG00000009828	635.295	-0.168331	0.0961432	-1.75084	0.0799736	0.465589
ENSMUSG00000009863	1352.72	0.0565875	0.0739142	0.765583	0.443924	0.822615
ENSMUSG00000009876	46.5408	0.455882	0.231426	1.96988	0.0488517	0.392854
ENSMUSG00000009894	916.655	0.0993233	0.0881484	1.12677	0.259838	0.701604
ENSMUSG00000009905	797.161	0.0220285	0.0966062	0.228024	0.819628	0.95977
ENSMUSG00000009907	1329.68	0.0327441	0.0990926	0.33044	0.741068	0.937795
ENSMUSG00000009927	8860.37	0.12122	0.103803	1.16779	0.242891	0.688357
ENSMUSG00000009941	2.28911	0.704926	1.28094	0.550318	0.582101	NA
ENSMUSG00000009995	882.957	0.0704694	0.131427	0.536187	0.59183	0.886202
ENSMUSG00000010021	46.9441	-0.339016	0.257485	-1.31664	0.187958	0.637238
ENSMUSG00000010025	1787.79	-0.185746	0.101191	-1.8356	0.066417	0.435575
ENSMUSG00000010044	5.09277	0.739013	0.679989	1.0868	0.277125	NA
ENSMUSG00000010045	681.811	-0.118716	0.078458	-1.51311	0.130251	0.565226
ENSMUSG00000010047	939.466	-0.225126	0.0804964	-2.79672	0.00516238	0.134713
ENSMUSG00000010048	437.628	-0.0953982	0.0901462	-1.05826	0.289937	0.72492
ENSMUSG00000010051	46.8001	0.205566	0.301884	0.680943	0.495907	0.847462
ENSMUSG00000010054	241.584	-0.146133	0.113365	-1.28905	0.197381	0.65087
ENSMUSG00000010057	340.632	0.0236182	0.102639	0.230109	0.818007	0.959495
ENSMUSG00000010064	14.8061	0.0964121	0.480226	0.200764	0.840883	NA
ENSMUSG00000010066	2.17305	-0.824031	1.12614	-0.73173	0.464334	NA
ENSMUSG00000010067	427.665	-0.188951	0.125922	-1.50055	0.133473	0.572016
ENSMUSG00000010080	364.664	-0.502805	0.240264	-2.09272	0.0363742	0.349976
ENSMUSG00000010095	4429.11	0.22984	0.117612	1.95422	0.0506749	0.3967
ENSMUSG00000010097	2945.23	0.0417657	0.0724096	0.576797	0.564076	0.87656
ENSMUSG00000010110	1583.23	-0.0703649	0.0736566	-0.955311	0.339421	0.762802
ENSMUSG00000010122	1.82572	-0.817656	1.23424	-0.662477	0.507666	NA
ENSMUSG00000010142	136.724	-0.191677	0.147087	-1.30315	0.192522	0.64325
ENSMUSG00000010154	103.97	-0.20065	0.173182	-1.15861	0.246617	0.691826
ENSMUSG00000010175	3.68431	0.562917	0.83789	0.671827	0.501694	NA
ENSMUSG00000010277	4309.72	-0.233668	0.0714983	-3.26817	0.00108247	0.0591334
ENSMUSG00000010290	441.796	0.136473	0.116541	1.17103	0.241585	0.687361
ENSMUSG00000010307	624.823	0.344429	0.0947117	3.63661	0.000276255	0.0272408
ENSMUSG00000010311	4.64815	1.13585	0.726346	1.56378	0.117869	NA
ENSMUSG00000010342	7.25559	-0.112215	0.690807	-0.16244	0.870959	NA
ENSMUSG00000010358	730.383	-0.00397312	0.179535	-0.0221301	0.982344	0.996654
ENSMUSG00000010362	241.046	-0.0180665	0.139048	-0.129929	0.896622	0.97864
ENSMUSG00000010376	1261.94	0.0596913	0.077518	0.770032	0.441281	0.821391
ENSMUSG00000010392	932.079	-0.188868	0.0880671	-2.1446	0.031985	0.328962
ENSMUSG00000010406	931.327	0.0492713	0.13015	0.378574	0.705004	0.92857
ENSMUSG00000010453	2479.78	-0.177391	0.106955	-1.65857	0.097203	0.502844
ENSMUSG00000010461	31.6459	0.736292	0.340298	2.16367	0.03049	0.322301
ENSMUSG00000010476	45.2471	0.262155	0.27724	0.945587	0.344359	0.767977
ENSMUSG00000010492	30.0834	-0.145919	0.341272	-0.427574	0.668961	0.913469
ENSMUSG00000010505	0.423319	-0.738108	2.65497	-0.27801	0.781005	NA
ENSMUSG00000010517	966.854	0.0730416	0.0872713	0.836949	0.402621	0.799898
ENSMUSG00000010529	6.14771	-0.204497	0.611226	-0.334568	0.737951	NA
ENSMUSG00000010538	21.3707	-0.067768	0.351775	-0.192646	0.847236	0.965495
ENSMUSG00000010554	752.507	-0.0445528	0.0957511	-0.465298	0.641718	0.902355
ENSMUSG00000010601	102.183	-0.0879044	0.251501	-0.349519	0.726699	0.933205
ENSMUSG00000010607	185.092	-0.0415871	0.139671	-0.29775	0.765894	0.946654
ENSMUSG00000010608	2964.6	0.15976	0.0833411	1.91695	0.0552448	0.406521
ENSMUSG00000010609	469.646	-0.00383705	0.101366	-0.0378534	0.969805	0.992889
ENSMUSG00000010651	56.5531	-0.0897516	0.219533	-0.40883	0.682665	0.919413
ENSMUSG00000010660	266.057	0.223903	0.158194	1.41537	0.156959	0.602625
ENSMUSG00000010663	1561.43	-0.0259345	0.0727534	-0.356471	0.721488	0.932856
ENSMUSG00000010721	236.232	0.227901	0.128128	1.77869	0.0752907	0.456619
ENSMUSG00000010751	395.447	-0.150651	0.112763	-1.336	0.18155	0.631491
ENSMUSG00000010755	933.272	0.127017	0.108679	1.16873	0.242512	0.687837
ENSMUSG00000010760	200.559	-0.385944	0.127445	-3.02832	0.00245915	0.0931522
ENSMUSG00000010797	5.96271	-0.778709	0.604614	-1.28794	0.197765	NA
ENSMUSG00000010825	2.42469	0.649226	1.01731	0.638177	0.523358	NA
ENSMUSG00000010830	857.373	0.127647	0.0942935	1.35372	0.175825	0.625861
ENSMUSG00000010841	0.570648	-0.275982	1.94243	-0.142081	0.887016	NA
ENSMUSG00000010911	167.613	-0.0181897	0.139176	-0.130696	0.896016	0.97864
ENSMUSG00000010914	254.464	0.207523	0.134773	1.5398	0.123609	0.55281
ENSMUSG00000010936	733.972	-0.0752245	0.112349	-0.66956	0.503138	0.850639
ENSMUSG00000011008	66.2739	0.547935	0.185541	2.95317	0.0031453	0.106625
ENSMUSG00000011096	1295.07	-0.107335	0.0777412	-1.38067	0.167379	0.616188
ENSMUSG00000011114	4166.02	0.0165755	0.0930572	0.178122	0.858627	0.968005
ENSMUSG00000011148	594.166	-0.118472	0.202398	-0.585341	0.558319	0.874415
ENSMUSG00000011158	1402.35	-0.104164	0.0951343	-1.09491	0.273556	0.711817
ENSMUSG00000011171	12.7633	-0.0688941	0.44595	-0.154488	0.877225	NA
ENSMUSG00000011179	3055.83	-0.148154	0.129347	-1.1454	0.252044	0.695115
ENSMUSG00000011254	373.129	-0.0671909	0.108628	-0.618542	0.536218	0.864635
ENSMUSG00000011256	467.326	-0.0507951	0.16384	-0.310029	0.756539	0.942909
ENSMUSG00000011257	3642.22	-0.190118	0.0793138	-2.39704	0.0165283	0.240955
ENSMUSG00000011263	64.4617	-0.0404638	0.208601	-0.193977	0.846194	0.965415
ENSMUSG00000011267	91.6781	-0.237057	0.187148	-1.26669	0.205267	0.656481
ENSMUSG00000011305	4.56706	0.268325	0.767747	0.349496	0.726717	NA
ENSMUSG00000011306	1136.89	0.025874	0.105474	0.245311	0.806216	0.955848
ENSMUSG00000011382	68.3483	-0.0216159	0.182634	-0.118357	0.905785	0.980504
ENSMUSG00000011427	163.542	-0.407502	0.14596	-2.79187	0.00524049	0.134826
ENSMUSG00000011463	3.48523	-0.718615	0.832327	-0.863381	0.387928	NA
ENSMUSG00000011486	0.319519	0.410179	3.16075	0.129773	0.896746	NA
ENSMUSG00000011589	2.92042	-1.39616	0.920193	-1.51725	0.129205	NA
ENSMUSG00000011632	1.35298	-2.26167	2.23162	-1.01347	0.310838	NA
ENSMUSG00000011658	178.831	0.0701532	0.151354	0.463503	0.643004	0.902651
ENSMUSG00000011751	3.55845	0.349994	0.835021	0.419144	0.675111	NA
ENSMUSG00000011752	2434.61	-0.177963	0.157157	-1.13239	0.257471	0.700007
ENSMUSG00000011831	784.623	-0.118866	0.129499	-0.917889	0.358677	0.777373
ENSMUSG00000011832	242.198	-0.0680873	0.111264	-0.611941	0.540577	0.866635
ENSMUSG00000011837	440.426	-0.0374115	0.101108	-0.370015	0.711372	0.931168
ENSMUSG00000011877	2993.36	-0.154641	0.107023	-1.44494	0.148476	0.595222
ENSMUSG00000011884	663.448	0.0307932	0.126588	0.243255	0.807808	0.956042
ENSMUSG00000011958	1547.7	0.0186399	0.0836121	0.222933	0.823588	0.960619
ENSMUSG00000011960	689.509	-0.0867782	0.110194	-0.787503	0.430987	0.815617
ENSMUSG00000012017	2315.62	0.0834489	0.1144	0.729449	0.465727	0.833293
ENSMUSG00000012076	337.741	0.0368171	0.11678	0.31527	0.752557	0.941902
ENSMUSG00000012114	1455.58	-0.168678	0.104439	-1.6151	0.10629	0.519434
ENSMUSG00000012117	690.361	-0.0362739	0.112906	-0.321275	0.748002	0.940345
ENSMUSG00000012123	40.2334	-0.0715769	0.229856	-0.311398	0.755498	0.942909
ENSMUSG00000012126	107.278	0.379182	0.235192	1.61222	0.106914	0.519582
ENSMUSG00000012187	1.45566	-2.33696	1.86625	-1.25222	0.21049	NA
ENSMUSG00000012211	0.749757	-0.762385	1.85777	-0.410376	0.68153	NA
ENSMUSG00000012296	1129.89	0.0569203	0.132846	0.428469	0.66831	0.913469
ENSMUSG00000012350	4.53783	-0.948976	1.04573	-0.907475	0.364156	NA
ENSMUSG00000012396	0.637261	0.0352988	1.70962	0.0206471	0.983527	NA
ENSMUSG00000012405	7032.61	-0.00486571	0.0979807	-0.0496598	0.960393	0.990741
ENSMUSG00000012422	844.06	0.298682	0.155253	1.92384	0.0543751	0.405497
ENSMUSG00000012428	442.225	0.366601	0.135872	2.69814	0.00697277	0.158997
ENSMUSG00000012429	207.302	0.332917	0.213316	1.56067	0.118601	0.540707
ENSMUSG00000012443	788.023	0.127892	0.121987	1.04841	0.294451	0.728196
ENSMUSG00000012483	334.335	0.295731	0.128206	2.30669	0.0210721	0.269505
ENSMUSG00000012519	808.479	0.0297104	0.0965637	0.307676	0.758329	0.943037
ENSMUSG00000012535	1002.59	-0.141888	0.104849	-1.35326	0.175973	0.625938
ENSMUSG00000012609	1051.32	-0.192771	0.11762	-1.63893	0.101228	0.511309
ENSMUSG00000012640	284.408	0.153691	0.147156	1.04441	0.296294	0.729427
ENSMUSG00000012705	13.1538	-1.07176	0.877368	-1.22157	0.221871	NA
ENSMUSG00000012777	2.46004	-0.73893	1.0659	-0.693243	0.488157	NA
ENSMUSG00000012819	137.091	-0.412486	0.179954	-2.29217	0.0218958	0.273974
ENSMUSG00000012848	17680.5	-0.101911	0.120222	-0.84769	0.396611	0.796813
ENSMUSG00000012889	1110.07	0.0829552	0.143444	0.57831	0.563055	0.87632
ENSMUSG00000013033	582.214	-0.200026	0.127202	-1.5725	0.115834	0.534663
ENSMUSG00000013076	10255.3	-0.305189	0.0977143	-3.12328	0.00178846	0.0767702
ENSMUSG00000013089	1472.66	-0.160342	0.0790357	-2.02873	0.0424858	0.37368
ENSMUSG00000013091	28.9022	-0.340383	0.36296	-0.937796	0.348349	0.771418
ENSMUSG00000013150	380.74	-0.244994	0.0939917	-2.60655	0.00914593	0.181401
ENSMUSG00000013155	221.221	0.0697754	0.118591	0.588369	0.556285	0.873029
ENSMUSG00000013158	2.80181	-0.124627	0.98372	-0.12669	0.899186	NA
ENSMUSG00000013160	1417.74	-0.0323686	0.0855114	-0.378529	0.705037	0.92857
ENSMUSG00000013236	6875.03	-0.195309	0.102152	-1.91194	0.0558834	0.406916
ENSMUSG00000013275	619.485	-0.0504661	0.125509	-0.402093	0.687615	0.921785
ENSMUSG00000013353	24.7535	-0.284369	0.399633	-0.711575	0.476728	0.837401
ENSMUSG00000013367	17.5273	0.2637	0.442773	0.595565	0.551466	NA
ENSMUSG00000013415	70.3544	-0.320154	0.293963	-1.0891	0.276111	0.713514
ENSMUSG00000013418	5.07857	-0.347351	0.805336	-0.431312	0.666241	NA
ENSMUSG00000013419	851.003	-0.353328	0.0804631	-4.39118	1.12737e-05	0.00363485
ENSMUSG00000013465	1421.24	0.0282669	0.0706808	0.399922	0.689214	0.922337
ENSMUSG00000013483	26.4182	0.503908	0.435255	1.15773	0.246974	0.691826
ENSMUSG00000013495	282.4	0.0965126	0.160736	0.600442	0.548212	0.870214
ENSMUSG00000013523	7.78817	-1.10486	0.638787	-1.72963	0.083697	NA
ENSMUSG00000013539	268.859	0.0381356	0.103427	0.368721	0.712335	0.93133
ENSMUSG00000013562	0.99125	-1.69386	1.72972	-0.979266	0.327449	NA
ENSMUSG00000013584	92.7996	0.363696	0.320996	1.13302	0.257204	0.699742
ENSMUSG00000013593	2902.6	-0.00520821	0.0651277	-0.0799691	0.936262	0.988121
ENSMUSG00000013622	638.016	0.0938499	0.0939613	0.998815	0.317884	0.74609
ENSMUSG00000013629	1776.26	0.000897791	0.109666	0.0081866	0.993468	0.99851
ENSMUSG00000013646	699.849	-0.143374	0.0887422	-1.61563	0.106175	0.519434
ENSMUSG00000013662	1270.93	0.0285111	0.104742	0.272203	0.785466	0.951814
ENSMUSG00000013663	1494.48	-0.0912043	0.136551	-0.667915	0.504188	0.850696
ENSMUSG00000013698	2503.26	-0.105204	0.0639307	-1.6456	0.099846	0.508494
ENSMUSG00000013701	528.399	0.00268096	0.0854081	0.03139	0.974959	0.99471
ENSMUSG00000013707	257.239	0.16081	0.134878	1.19227	0.233157	0.683814
ENSMUSG00000013736	456.37	0.131411	0.120341	1.09199	0.274839	0.712217
ENSMUSG00000013766	2.49116	2.64363	1.3547	1.95145	0.0510033	NA
ENSMUSG00000013787	4471.38	-0.158617	0.0787142	-2.0151	0.0438941	0.378685
ENSMUSG00000013822	843.747	-0.0424023	0.0927223	-0.457304	0.647452	0.904867
ENSMUSG00000013833	830.481	-0.306641	0.125185	-2.4495	0.0143055	0.224356
ENSMUSG00000013846	1684.79	-0.152443	0.131506	-1.15921	0.24637	0.691572
ENSMUSG00000013858	2637.28	-0.13664	0.0899108	-1.51973	0.128578	0.562692
ENSMUSG00000013878	229.699	0.116034	0.119895	0.967797	0.333146	0.758537
ENSMUSG00000013921	64.9343	-0.269927	0.265637	-1.01615	0.309559	0.742225
ENSMUSG00000013928	0.775633	-0.394161	1.8144	-0.21724	0.828021	NA
ENSMUSG00000013936	14.5773	1.62193	0.590177	2.74821	0.00599222	NA
ENSMUSG00000013973	103.241	0.044673	0.162055	0.275666	0.782805	0.950704
ENSMUSG00000013974	132.425	0.987658	0.30208	3.26953	0.00107726	0.0591334
ENSMUSG00000013997	444.257	0.103017	0.129539	0.795263	0.426461	0.812614
ENSMUSG00000014030	13.1126	1.71151	0.803086	2.13117	0.0330755	NA
ENSMUSG00000014039	268.83	-0.214881	0.149709	-1.43532	0.151196	0.598099
ENSMUSG00000014074	505.08	0.00783264	0.106653	0.0734404	0.941456	0.988971
ENSMUSG00000014075	188.364	0.242378	0.160783	1.50748	0.131687	0.568042
ENSMUSG00000014077	925.809	-0.107011	0.130506	-0.819975	0.412231	0.802477
ENSMUSG00000014158	1234.03	-0.11659	0.0945531	-1.23306	0.217554	0.669218
ENSMUSG00000014164	52.6054	0.273702	0.215145	1.27218	0.20331	0.65551
ENSMUSG00000014177	517.476	0.072019	0.125108	0.575653	0.56485	0.87656
ENSMUSG00000014195	2314.42	0.0519446	0.0959985	0.541099	0.58844	0.884925
ENSMUSG00000014198	1.31804	-0.144615	1.44225	-0.100271	0.920129	NA
ENSMUSG00000014226	1455.61	0.100567	0.137981	0.728845	0.466097	0.833293
ENSMUSG00000014232	182.303	0.0526609	0.1543	0.341289	0.732886	0.935207
ENSMUSG00000014243	105.599	0.114088	0.202141	0.564399	0.572483	0.879483
ENSMUSG00000014245	154.811	0.0347864	0.158363	0.219663	0.826134	0.960619
ENSMUSG00000014294	906.277	0.156495	0.14615	1.07079	0.284265	0.719565
ENSMUSG00000014301	207.773	-0.0655161	0.109535	-0.598128	0.549754	0.870635
ENSMUSG00000014303	1320.49	-0.207331	0.0992242	-2.08952	0.0366609	0.35045
ENSMUSG00000014313	2724.48	0.0638111	0.119012	0.536174	0.591839	0.886202
ENSMUSG00000014329	135.628	-0.176514	0.204499	-0.863151	0.388054	0.792477
ENSMUSG00000014349	3498.66	-0.168476	0.0692898	-2.43147	0.0150379	0.228853
ENSMUSG00000014351	0.375528	-1.20295	3.13805	-0.383342	0.701466	NA
ENSMUSG00000014353	925.284	0.102697	0.114401	0.897694	0.369349	0.782628
ENSMUSG00000014355	2033.79	0.0743084	0.0960472	0.773666	0.439128	0.820379
ENSMUSG00000014361	227.701	0.26866	0.197155	1.36268	0.172983	0.623082
ENSMUSG00000014402	1182.36	-0.135839	0.0816323	-1.66403	0.0961061	0.500908
ENSMUSG00000014418	627.141	0.0303378	0.0868189	0.349438	0.726761	0.933205
ENSMUSG00000014426	882.73	-0.188902	0.102611	-1.84094	0.0656297	0.434468
ENSMUSG00000014444	2192.36	-0.102837	0.322531	-0.318844	0.749845	0.941306
ENSMUSG00000014453	4.70603	0.704889	0.967043	0.728912	0.466055	NA
ENSMUSG00000014470	739.879	-0.181622	0.0796058	-2.28151	0.022518	0.277144
ENSMUSG00000014496	1696.13	0.110906	0.0855087	1.29701	0.194627	0.645992
ENSMUSG00000014498	1827.05	-0.369222	0.141185	-2.61517	0.00891843	0.179456
ENSMUSG00000014503	168.69	-0.143173	0.118653	-1.20665	0.227566	0.679105
ENSMUSG00000014504	709.72	0.0978739	0.114122	0.857626	0.391099	0.793764
ENSMUSG00000014543	7.81789	-0.19772	0.624447	-0.316632	0.751523	NA
ENSMUSG00000014547	827.959	0.0189748	0.103549	0.183244	0.854606	0.966801
ENSMUSG00000014550	544.023	-0.0971874	0.117768	-0.825245	0.409232	0.801189
ENSMUSG00000014551	385.815	0.0483781	0.108131	0.447403	0.654584	0.907795
ENSMUSG00000014554	488.388	0.0316112	0.0917414	0.344569	0.730418	0.934426
ENSMUSG00000014592	159.692	0.127094	0.135241	0.939757	0.347342	0.770366
ENSMUSG00000014599	2900.24	0.36618	0.172802	2.11907	0.0340849	0.339386
ENSMUSG00000014601	1217.59	-0.168815	0.104712	-1.61218	0.106922	0.519582
ENSMUSG00000014602	34.9097	-0.225523	0.271183	-0.831625	0.405621	0.800245
ENSMUSG00000014606	1276.97	-0.00129986	0.0839539	-0.015483	0.987647	0.997528
ENSMUSG00000014609	2.24858	0.422387	1.08664	0.388709	0.697492	NA
ENSMUSG00000014633	187.315	0.231631	0.151903	1.52487	0.127293	0.560011
ENSMUSG00000014668	427.912	-0.0935571	0.10284	-0.909734	0.362963	0.780173
ENSMUSG00000014686	17.6605	-0.522683	0.430605	-1.21383	0.224811	NA
ENSMUSG00000014704	226.458	0.0603934	0.143172	0.421824	0.673153	0.915593
ENSMUSG00000014725	4.11232	-0.841828	0.726567	-1.15864	0.246604	NA
ENSMUSG00000014747	6.06752	-0.917797	0.668689	-1.37253	0.169898	NA
ENSMUSG00000014748	1151.76	-0.105118	0.0893749	-1.17615	0.239535	0.686803
ENSMUSG00000014763	780.416	-0.177402	0.0928215	-1.91121	0.0559774	0.406923
ENSMUSG00000014767	486.872	0.0161693	0.103813	0.155755	0.876226	0.973438
ENSMUSG00000014769	3877.24	0.0928216	0.0969244	0.95767	0.338229	0.761581
ENSMUSG00000014773	252.713	-0.194649	0.141542	-1.37521	0.169067	0.61828
ENSMUSG00000014776	32.6042	0.0511328	0.327007	0.156366	0.875745	0.973438
ENSMUSG00000014778	2151.39	-0.117576	0.110835	-1.06082	0.288772	0.723573
ENSMUSG00000014782	75.2995	0.11351	0.210188	0.540037	0.589172	0.885057
ENSMUSG00000014786	959.458	0.00978684	0.144118	0.0679086	0.945858	0.989056
ENSMUSG00000014791	517.735	-0.330956	0.1888	-1.75294	0.0796118	0.465159
ENSMUSG00000014813	737.649	-0.0687408	0.130512	-0.526701	0.598401	0.887701
ENSMUSG00000014837	161.974	-0.193669	0.183523	-1.05528	0.291296	0.725944
ENSMUSG00000014846	194.507	-0.0914181	0.174039	-0.525275	0.599392	0.887701
ENSMUSG00000014850	279.803	-0.01079	0.0978849	-0.110232	0.912226	0.982451
ENSMUSG00000014852	0.946748	-0.0564398	1.47857	-0.0381717	0.969551	NA
ENSMUSG00000014856	758.725	0.0792518	0.122993	0.644359	0.519343	0.857572
ENSMUSG00000014859	1609.28	-0.111618	0.074521	-1.4978	0.134185	0.572412
ENSMUSG00000014867	3748.63	0.0709543	0.0855611	0.829283	0.406944	0.80038
ENSMUSG00000014873	363.516	-0.074698	0.104781	-0.712899	0.475908	0.837401
ENSMUSG00000014905	403.509	0.0843769	0.245267	0.344021	0.73083	0.934426
ENSMUSG00000014907	464.576	-0.108254	0.212721	-0.508899	0.610823	0.891723
ENSMUSG00000014932	610.873	0.0502042	0.185107	0.271218	0.786224	0.952036
ENSMUSG00000014956	2390.28	0.309389	0.216624	1.42823	0.153225	0.601569
ENSMUSG00000014959	1951.02	0.00328066	0.0743909	0.0441003	0.964824	0.991248
ENSMUSG00000014980	329.759	-0.0140551	0.104143	-0.134959	0.892644	0.977846
ENSMUSG00000015002	2432.7	-0.0884843	0.105722	-0.836955	0.402618	0.799898
ENSMUSG00000015013	513.277	-0.128053	0.0901053	-1.42115	0.155272	0.602318
ENSMUSG00000015016	341.043	-0.175477	0.145903	-1.2027	0.229093	0.680991
ENSMUSG00000015023	898.707	-0.0559896	0.076545	-0.73146	0.464498	0.833293
ENSMUSG00000015027	630.294	0.0612553	0.0905809	0.676249	0.498883	0.848235
ENSMUSG00000015053	41.9316	-0.334324	0.238633	-1.401	0.161215	0.60885
ENSMUSG00000015083	37.1912	0.231264	0.26728	0.865248	0.386902	0.791534
ENSMUSG00000015085	12.8682	0.235819	0.48911	0.48214	0.629707	NA
ENSMUSG00000015087	1480.45	0.00557539	0.0875223	0.0637025	0.949207	0.989158
ENSMUSG00000015090	1.38933	-2.70634	1.43806	-1.88194	0.059844	NA
ENSMUSG00000015092	1622.8	0.121386	0.0833389	1.45653	0.145245	0.591374
ENSMUSG00000015093	16.3728	0.488835	0.375715	1.30108	0.193232	NA
ENSMUSG00000015094	1646.31	-0.0224129	0.0902224	-0.248418	0.803811	0.955848
ENSMUSG00000015095	1019.84	-0.0827774	0.100543	-0.8233	0.410338	0.801806
ENSMUSG00000015112	567.354	0.0501673	0.132537	0.378516	0.705047	0.92857
ENSMUSG00000015120	2934.53	-0.0490957	0.0905873	-0.541971	0.587838	0.884693
ENSMUSG00000015126	442.293	-0.0380965	0.107767	-0.353508	0.723708	0.932856
ENSMUSG00000015127	189.39	-0.440554	0.228847	-1.9251	0.0542166	0.405497
ENSMUSG00000015133	2348.23	-0.190232	0.113334	-1.67851	0.0932473	0.495557
ENSMUSG00000015134	14.2997	-0.849726	0.551992	-1.53938	0.123711	NA
ENSMUSG00000015143	4219.34	-0.0180444	0.0970855	-0.185861	0.852553	0.966395
ENSMUSG00000015149	1065.24	-0.137713	0.124183	-1.10895	0.267451	0.707827
ENSMUSG00000015165	6458.61	0.00351497	0.0651738	0.0539322	0.956989	0.990274
ENSMUSG00000015176	2021.02	-0.0722832	0.084824	-0.852155	0.394128	0.794676
ENSMUSG00000015189	919.865	0.0546374	0.104333	0.523683	0.600499	0.887701
ENSMUSG00000015202	210.794	0.0400853	0.170978	0.234448	0.814637	0.958267
ENSMUSG00000015214	272.441	-0.132483	0.147423	-0.898658	0.368835	0.78248
ENSMUSG00000015217	729.345	-0.0479535	0.109149	-0.439341	0.660414	0.911239
ENSMUSG00000015222	348.348	0.247021	0.186956	1.32128	0.186407	0.635131
ENSMUSG00000015224	1.59358	-0.100901	1.1149	-0.0905022	0.927888	NA
ENSMUSG00000015243	1043.01	0.295772	0.15568	1.89987	0.0574502	0.412475
ENSMUSG00000015247	242.936	-0.0117388	0.126967	-0.0924554	0.926336	0.985643
ENSMUSG00000015289	327.389	-0.0495635	0.129066	-0.384016	0.700967	0.926241
ENSMUSG00000015290	559.796	0.0880569	0.0921671	0.955405	0.339373	0.762802
ENSMUSG00000015291	2141.65	0.00461673	0.0968198	0.0476837	0.961968	0.991085
ENSMUSG00000015305	1625.84	0.0959592	0.136269	0.704191	0.481314	0.839997
ENSMUSG00000015312	200.88	0.0763429	0.148281	0.514852	0.606656	0.890413
ENSMUSG00000015314	73.1752	0.0737495	0.185042	0.398555	0.690221	0.922871
ENSMUSG00000015316	4.57678	0.207365	0.952667	0.217668	0.827688	NA
ENSMUSG00000015335	350.021	-0.0582874	0.131626	-0.442826	0.657891	0.91007
ENSMUSG00000015337	58.704	0.02035	0.198228	0.10266	0.918233	0.983891
ENSMUSG00000015340	1530.63	0.180921	0.16982	1.06537	0.286707	0.720799
ENSMUSG00000015341	1224.69	-0.00949444	0.111987	-0.0847816	0.932435	0.986863
ENSMUSG00000015342	37.473	0.256692	0.278363	0.922149	0.356451	0.77666
ENSMUSG00000015354	510.146	0.193364	0.156224	1.23773	0.215815	0.667832
ENSMUSG00000015355	154.258	0.186905	0.15404	1.21335	0.224995	0.676912
ENSMUSG00000015357	633.332	-0.00906282	0.0879681	-0.103024	0.917944	0.983871
ENSMUSG00000015363	956.117	-0.0938058	0.0856706	-1.09496	0.273535	0.711817
ENSMUSG00000015377	350.976	0.0135387	0.144698	0.0935654	0.925454	0.985643
ENSMUSG00000015396	275.511	0.0171576	0.161231	0.106417	0.915252	0.983571
ENSMUSG00000015405	0.654126	-2.10539	2.33375	-0.902148	0.366978	NA
ENSMUSG00000015437	133.408	0.0280763	0.325203	0.0863346	0.9312	0.986488
ENSMUSG00000015441	458.735	-1.0494	0.641224	-1.63655	0.101725	0.511992
ENSMUSG00000015451	74.7144	-0.0387962	0.178768	-0.21702	0.828193	0.960874
ENSMUSG00000015452	61.0805	0.28486	0.237601	1.1989	0.230568	0.681952
ENSMUSG00000015461	1158.21	0.0618701	0.0903845	0.684521	0.493646	0.846237
ENSMUSG00000015467	28.4684	-0.131221	0.30379	-0.431945	0.665781	0.912842
ENSMUSG00000015468	726.389	0.172584	0.134519	1.28297	0.199504	0.652317
ENSMUSG00000015474	254.975	0.011333	0.117119	0.0967648	0.922913	0.985053
ENSMUSG00000015476	15.9574	0.652399	0.370414	1.76127	0.0781929	NA
ENSMUSG00000015478	367.771	-0.216445	0.145173	-1.49095	0.135975	0.576148
ENSMUSG00000015488	648.929	-0.0884436	0.0898125	-0.984758	0.324743	0.752003
ENSMUSG00000015501	1336.63	-0.0321768	0.110237	-0.291886	0.770374	0.947833
ENSMUSG00000015522	1347.71	0.0192006	0.0906268	0.211864	0.832213	0.961167
ENSMUSG00000015533	1012.99	-0.488482	0.136683	-3.57383	0.000351797	0.0308489
ENSMUSG00000015536	407.977	0.0515847	0.10574	0.487843	0.625661	0.896785
ENSMUSG00000015542	312.961	-0.081616	0.110071	-0.741488	0.458397	0.831739
ENSMUSG00000015568	263.702	0.392634	0.281616	1.39422	0.163251	0.611218
ENSMUSG00000015575	1576.61	0.10503	0.107194	0.979817	0.327177	0.752619
ENSMUSG00000015597	492.831	-0.0546699	0.104422	-0.523546	0.600594	0.887701
ENSMUSG00000015599	2.05439	0.290856	1.02336	0.284215	0.776245	NA
ENSMUSG00000015605	881.112	-0.265565	0.127564	-2.08182	0.0373586	0.353474
ENSMUSG00000015619	1613.86	-0.238549	0.1321	-1.80582	0.0709471	0.447387
ENSMUSG00000015647	15046.8	0.0131941	0.130056	0.101449	0.919194	0.984602
ENSMUSG00000015652	195.185	0.51096	0.166352	3.07155	0.00212949	0.0855747
ENSMUSG00000015653	1368.12	0.140833	0.108216	1.30141	0.193118	0.643293
ENSMUSG00000015656	30879.6	-0.122441	0.0773709	-1.58252	0.113531	0.53086
ENSMUSG00000015659	207.508	-0.0227987	0.132737	-0.171758	0.863628	0.969736
ENSMUSG00000015668	278.194	0.0579353	0.113851	0.508868	0.610845	0.891723
ENSMUSG00000015671	1986.42	0.0901332	0.0766387	1.17608	0.239563	0.686803
ENSMUSG00000015672	323.099	0.114454	0.146612	0.780661	0.435002	0.818151
ENSMUSG00000015697	1581.1	-0.0879751	0.0884672	-0.994438	0.32001	0.74703
ENSMUSG00000015702	173.555	0.0981112	0.146805	0.668311	0.503935	0.850671
ENSMUSG00000015709	9.92679	-0.199048	0.541999	-0.367248	0.713434	NA
ENSMUSG00000015711	592.552	-0.0944879	0.129275	-0.730905	0.464837	0.833293
ENSMUSG00000015714	3532.97	-0.0426503	0.0880958	-0.484135	0.62829	0.897169
ENSMUSG00000015733	2626.97	0.17321	0.116632	1.48509	0.137519	0.578272
ENSMUSG00000015745	1073.65	-0.027216	0.0748453	-0.36363	0.716135	0.932014
ENSMUSG00000015747	339.92	0.0540617	0.0956898	0.564969	0.572095	0.879483
ENSMUSG00000015748	961.156	0.0353301	0.077485	0.45596	0.648419	0.905393
ENSMUSG00000015749	2510.64	-0.00178533	0.064966	-0.0274811	0.978076	0.996026
ENSMUSG00000015750	1196.35	-0.0836137	0.079584	-1.05064	0.293426	0.727551
ENSMUSG00000015755	2368.3	-0.141725	0.0961737	-1.47364	0.140579	0.581993
ENSMUSG00000015757	584.274	-0.0309749	0.0822981	-0.376374	0.706639	0.929136
ENSMUSG00000015759	837.411	0.142551	0.136306	1.04581	0.295648	0.729384
ENSMUSG00000015766	2721.91	-0.0880231	0.0826086	-1.06554	0.28663	0.720799
ENSMUSG00000015776	1154.61	-0.156621	0.0739236	-2.11869	0.0341167	0.339386
ENSMUSG00000015790	434.676	0.0803204	0.109922	0.730701	0.464962	0.833293
ENSMUSG00000015804	906.567	0.0749579	0.0877735	0.853993	0.393109	0.794514
ENSMUSG00000015806	247.974	0.010235	0.151131	0.0677226	0.946006	0.989056
ENSMUSG00000015812	32.0945	0.489307	0.295292	1.65703	0.0975137	0.503194
ENSMUSG00000015829	61.5748	0.519819	0.441717	1.17682	0.239269	0.686796
ENSMUSG00000015837	9174.85	-0.0206155	0.0898776	-0.229373	0.818579	0.959495
ENSMUSG00000015839	1703.08	0.0736835	0.0778442	0.946552	0.343867	0.767491
ENSMUSG00000015843	4.5056	-0.0552059	0.872348	-0.0632843	0.94954	NA
ENSMUSG00000015846	1628.7	0.00107487	0.0765266	0.0140457	0.988794	0.997528
ENSMUSG00000015850	189.824	0.263913	0.174987	1.50818	0.131507	0.567953
ENSMUSG00000015852	294.294	0.125324	0.55547	0.225618	0.821499	0.960457
ENSMUSG00000015854	2.76818	-0.507303	1.57008	-0.323107	0.746614	NA
ENSMUSG00000015869	1337.91	-0.0175657	0.0791515	-0.221925	0.824372	0.960619
ENSMUSG00000015879	1.96586	1.25367	1.13278	1.10672	0.268415	NA
ENSMUSG00000015880	301.92	0.343932	0.123071	2.79458	0.00519664	0.134826
ENSMUSG00000015882	157.421	-0.00655753	0.232905	-0.0281554	0.977538	0.995782
ENSMUSG00000015889	1139.95	-0.00821173	0.071202	-0.11533	0.908183	0.981472
ENSMUSG00000015890	15.3847	0.263073	0.41208	0.638402	0.523212	NA
ENSMUSG00000015932	3303.48	-0.0242809	0.0886467	-0.273906	0.784157	0.951466
ENSMUSG00000015937	1887.53	-0.0352898	0.0717859	-0.491599	0.623003	0.895615
ENSMUSG00000015942	371.47	0.066995	0.111776	0.59937	0.548927	0.870214
ENSMUSG00000015943	216.169	0.0707922	0.157362	0.449868	0.652806	0.907035
ENSMUSG00000015944	379.071	-0.285389	0.136916	-2.08441	0.0371229	0.352085
ENSMUSG00000015947	925.702	0.182379	0.118989	1.53274	0.12534	0.556841
ENSMUSG00000015950	931.101	0.0690225	0.12048	0.572898	0.566714	0.877898
ENSMUSG00000015957	58.1339	-0.405208	0.272487	-1.48707	0.136995	0.577472
ENSMUSG00000015961	2421.92	0.162625	0.0916336	1.77473	0.075943	0.457888
ENSMUSG00000015962	8.93604	0.57261	0.532439	1.07545	0.282175	NA
ENSMUSG00000015966	4.96213	0.406805	0.672407	0.604999	0.54518	NA
ENSMUSG00000015968	81.3792	0.0658209	0.212684	0.309477	0.756959	0.942909
ENSMUSG00000015970	21.2327	-0.0973937	0.365294	-0.266618	0.789764	0.952599
ENSMUSG00000015971	485.395	-0.0327962	0.104268	-0.314538	0.753113	0.942047
ENSMUSG00000015980	78.0946	0.130552	0.204655	0.637912	0.523531	0.859757
ENSMUSG00000015981	12.3553	-0.510043	0.505371	-1.00924	0.312858	NA
ENSMUSG00000015994	1386.92	-0.0698272	0.068436	-1.02033	0.307572	0.740567
ENSMUSG00000016018	831.142	-0.0955187	0.0990205	-0.964635	0.334728	0.759269
ENSMUSG00000016024	596.587	1.34123	0.409815	3.27277	0.00106501	0.0591334
ENSMUSG00000016028	541.405	-0.22322	0.112039	-1.99234	0.0463337	0.387671
ENSMUSG00000016087	262.043	0.223904	0.190521	1.17522	0.239905	0.687341
ENSMUSG00000016128	200.037	-0.0479874	0.15459	-0.310416	0.756244	0.942909
ENSMUSG00000016179	6.9352	-0.11744	0.737936	-0.159146	0.873554	NA
ENSMUSG00000016181	493.087	-0.000860997	0.0842528	-0.0102192	0.991846	0.997985
ENSMUSG00000016194	60.4864	1.16361	0.372108	3.12709	0.00176546	0.0764887
ENSMUSG00000016200	0.737919	2.98901	2.23374	1.33812	0.180858	NA
ENSMUSG00000016206	574.214	0.0103562	0.123126	0.0841107	0.932968	0.987078
ENSMUSG00000016239	11.4529	0.0845002	0.517563	0.163265	0.870309	NA
ENSMUSG00000016252	1536.06	0.18672	0.136063	1.37231	0.169968	0.619279
ENSMUSG00000016253	526.323	0.00693496	0.103169	0.0672197	0.946407	0.989056
ENSMUSG00000016255	1.89424	0.591905	1.29584	0.456773	0.647834	NA
ENSMUSG00000016256	7075.45	0.107515	0.0689169	1.56007	0.118743	0.540917
ENSMUSG00000016257	525.291	0.068098	0.0879431	0.774342	0.438729	0.820301
ENSMUSG00000016262	840.684	0.0488715	0.137418	0.35564	0.72211	0.932856
ENSMUSG00000016283	5.96262	-0.477132	0.753072	-0.633581	0.526355	NA
ENSMUSG00000016308	422.667	0.0884728	0.15255	0.579959	0.561942	0.876155
ENSMUSG00000016319	2754.54	0.05731	0.120144	0.477011	0.633354	0.900191
ENSMUSG00000016327	2.07362	0.31036	1.20123	0.258369	0.796122	NA
ENSMUSG00000016344	547.791	-0.185759	0.132577	-1.40114	0.161173	0.60885
ENSMUSG00000016346	0.293796	1.55525	3.13756	0.495689	0.620114	NA
ENSMUSG00000016349	285.633	0.749575	0.498677	1.50313	0.132806	0.570216
ENSMUSG00000016356	143.527	0.0902041	0.169956	0.530749	0.595593	0.887491
ENSMUSG00000016382	3089.7	0.0417776	0.0838554	0.49821	0.618336	0.89493
ENSMUSG00000016386	2.49106	-0.603243	1.02711	-0.587318	0.55699	NA
ENSMUSG00000016409	329.534	-0.0308237	0.11217	-0.274794	0.783474	0.950902
ENSMUSG00000016427	340.384	0.0840781	0.1715	0.490251	0.623956	0.895798
ENSMUSG00000016458	5.30579	-1.3408	0.708411	-1.89268	0.0584006	NA
ENSMUSG00000016477	525.218	-0.0425613	0.113446	-0.375167	0.707537	0.929614
ENSMUSG00000016481	742.675	-0.0429343	0.0924801	-0.464255	0.642465	0.902355
ENSMUSG00000016487	1869.09	-0.067635	0.0887264	-0.762288	0.445888	0.824123
ENSMUSG00000016493	50.8479	0.495713	0.210723	2.35244	0.0186508	0.256777
ENSMUSG00000016494	794.257	0.307442	0.1702	1.80636	0.0708625	0.447387
ENSMUSG00000016495	686.695	0.132646	0.11851	1.11929	0.263018	0.704475
ENSMUSG00000016496	409.86	0.237425	0.176786	1.34301	0.179269	0.628576
ENSMUSG00000016498	45.6142	-0.372592	0.278517	-1.33777	0.180971	0.630584
ENSMUSG00000016503	202.056	-0.111322	0.134905	-0.825191	0.409263	0.801189
ENSMUSG00000016510	181.581	0.10632	0.117723	0.903133	0.366455	0.780955
ENSMUSG00000016520	365.97	-0.224314	0.130219	-1.72259	0.0849634	0.473826
ENSMUSG00000016524	0.846269	3.1583	2.17002	1.45542	0.145553	NA
ENSMUSG00000016526	341.956	-0.356197	0.155042	-2.29742	0.0215948	0.272174
ENSMUSG00000016528	3641.81	0.0150781	0.0795925	0.189441	0.849747	0.965884
ENSMUSG00000016529	4.59127	-0.656626	0.7563	-0.868208	0.38528	NA
ENSMUSG00000016534	3286.87	0.4217	0.19045	2.21424	0.0268126	0.302219
ENSMUSG00000016541	2281.13	0.0999248	0.0913966	1.09331	0.274258	0.711878
ENSMUSG00000016552	24.0984	0.0419761	0.305154	0.137557	0.89059	0.977063
ENSMUSG00000016554	1227.33	0.0738509	0.118968	0.620765	0.534754	0.863767
ENSMUSG00000016559	18123.7	0.0841888	0.0855122	0.984524	0.324858	0.752003
ENSMUSG00000016619	826.638	-0.173354	0.101562	-1.70689	0.0878425	0.482125
ENSMUSG00000016624	28.2866	-0.228562	0.30129	-0.758612	0.448085	0.826023
ENSMUSG00000016637	96.0806	0.001948	0.174768	0.0111462	0.991107	0.997722
ENSMUSG00000016664	1406.95	-0.094129	0.117646	-0.800101	0.423652	0.810923
ENSMUSG00000016756	50.7916	0.097307	0.26441	0.368015	0.712862	0.931666
ENSMUSG00000016757	839.099	-0.0517756	0.0731354	-0.707942	0.478981	0.837927
ENSMUSG00000016758	39.7658	0.0871633	0.350981	0.248342	0.80387	0.955848
ENSMUSG00000016763	30.0754	-0.45434	0.361274	-1.2576	0.208535	0.661131
ENSMUSG00000016831	1119.6	-0.0193979	0.0855055	-0.226861	0.820532	0.960068
ENSMUSG00000016833	133.604	0.518455	0.228897	2.26502	0.0235116	0.284437
ENSMUSG00000016918	309.289	-0.411908	0.203476	-2.02436	0.0429336	0.374816
ENSMUSG00000016921	5368.18	0.0261902	0.091062	0.287608	0.773647	0.947993
ENSMUSG00000016933	1815.24	-0.12349	0.0900908	-1.37073	0.17046	0.619328
ENSMUSG00000016940	776.602	-0.0574702	0.111668	-0.514655	0.606794	0.890413
ENSMUSG00000016942	359.002	-0.723715	0.545547	-1.32659	0.184645	0.633411
ENSMUSG00000016946	920.026	-0.141783	0.0875232	-1.61995	0.105243	0.516858
ENSMUSG00000016984	251.068	-0.0387006	0.169126	-0.228828	0.819003	0.959495
ENSMUSG00000016995	11.7236	-0.0224146	0.421166	-0.0532202	0.957556	NA
ENSMUSG00000017002	2183.04	0.118139	0.145428	0.812351	0.41659	0.806226
ENSMUSG00000017007	1.58474	-0.20825	1.26082	-0.16517	0.86881	NA
ENSMUSG00000017009	6155.85	0.0680512	0.130194	0.52269	0.60119	0.888174
ENSMUSG00000017057	1566.65	0.279637	0.168841	1.65621	0.0976787	0.503239
ENSMUSG00000017119	2423.81	-0.141831	0.0893726	-1.58697	0.11252	0.528807
ENSMUSG00000017132	809.144	-0.0831217	0.0982131	-0.846341	0.397363	0.797025
ENSMUSG00000017144	1656.14	0.12746	0.146463	0.870257	0.38416	0.78896
ENSMUSG00000017146	280.025	0.106478	0.147346	0.722638	0.469902	0.835542
ENSMUSG00000017167	210.438	0.106779	0.21582	0.494758	0.620771	0.895285
ENSMUSG00000017176	1005.62	0.031296	0.100496	0.311415	0.755485	0.942909
ENSMUSG00000017188	720.187	-0.0264343	0.0913531	-0.289364	0.772303	0.947993
ENSMUSG00000017195	1.32816	-1.00628	1.2867	-0.782063	0.434178	NA
ENSMUSG00000017210	3458.06	-0.166709	0.112611	-1.48039	0.138769	0.579986
ENSMUSG00000017221	3483.23	-0.0373601	0.0942609	-0.396348	0.691848	0.922961
ENSMUSG00000017264	1522.07	-0.0395023	0.0938397	-0.420955	0.673788	0.915733
ENSMUSG00000017286	756.369	-0.0643394	0.0965965	-0.666064	0.50537	0.851538
ENSMUSG00000017288	817.956	0.034155	0.0805775	0.423878	0.671655	0.914728
ENSMUSG00000017291	2097.21	0.01882	0.122485	0.153651	0.877885	0.973844
ENSMUSG00000017299	325.993	-0.0905846	0.105697	-0.857018	0.391435	0.794079
ENSMUSG00000017307	161.527	0.0296279	0.132541	0.223538	0.823117	0.960619
ENSMUSG00000017309	12.7733	0.305485	0.500718	0.610093	0.5418	NA
ENSMUSG00000017311	0.154484	0.410174	3.16075	0.129771	0.896747	NA
ENSMUSG00000017314	48.1634	-0.0613355	0.294488	-0.208278	0.835012	0.96134
ENSMUSG00000017344	31.3504	0.817451	0.309535	2.6409	0.00826865	0.172124
ENSMUSG00000017376	416.677	-0.247613	0.108326	-2.2858	0.0222658	0.275358
ENSMUSG00000017386	1334.35	-0.268067	0.0884658	-3.03018	0.0024441	0.0931522
ENSMUSG00000017390	837.985	-0.23743	0.141548	-1.67738	0.0934676	0.495728
ENSMUSG00000017400	21.4827	0.187296	0.378671	0.494614	0.620873	0.895338
ENSMUSG00000017404	6226.44	0.0551374	0.190832	0.288932	0.772634	0.947993
ENSMUSG00000017405	331.785	-0.0185164	0.189047	-0.0979459	0.921975	0.985053
ENSMUSG00000017412	17.1931	1.00359	0.437761	2.29255	0.0218742	NA
ENSMUSG00000017417	83.7688	0.162211	0.195755	0.828641	0.407308	0.800699
ENSMUSG00000017418	537.603	0.0462995	0.115985	0.399184	0.689758	0.922516
ENSMUSG00000017421	3585.18	0.00910156	0.0930716	0.0977911	0.922098	0.985053
ENSMUSG00000017428	2095.79	-0.00445548	0.0572844	-0.0777783	0.938004	0.988409
ENSMUSG00000017446	676.693	-0.138744	0.149102	-0.930532	0.352096	0.774343
ENSMUSG00000017453	21.3737	0.0789222	0.560711	0.140754	0.888064	0.976146
ENSMUSG00000017466	9596.38	0.0798661	0.107461	0.74321	0.457354	0.831501
ENSMUSG00000017478	1756.08	-0.190963	0.0891302	-2.14252	0.0321519	0.329881
ENSMUSG00000017485	1868.1	0.014008	0.0828731	0.169029	0.865774	0.970103
ENSMUSG00000017491	9.27688	-0.0759726	0.486645	-0.156115	0.875942	NA
ENSMUSG00000017493	24402.7	0.0155965	0.0856521	0.182091	0.855511	0.966801
ENSMUSG00000017499	234.886	0.23703	0.13404	1.76835	0.0770027	0.458608
ENSMUSG00000017548	1425.32	0.0888561	0.121225	0.732988	0.463566	0.83325
ENSMUSG00000017550	282.605	0.33067	0.119359	2.77039	0.00559899	0.140879
ENSMUSG00000017561	646.15	-0.00389232	0.0785494	-0.0495525	0.960479	0.990741
ENSMUSG00000017607	5315.59	-0.282283	0.109927	-2.56791	0.0102314	0.191428
ENSMUSG00000017615	1931.18	-0.148446	0.064542	-2.3	0.0214484	0.272059
ENSMUSG00000017631	1770.84	-0.138378	0.120509	-1.14828	0.250853	0.693791
ENSMUSG00000017639	112.945	-0.0694902	0.226024	-0.307446	0.758504	0.94313
ENSMUSG00000017652	333.218	-0.14357	0.191378	-0.750188	0.453141	0.828697
ENSMUSG00000017664	735.697	0.0514851	0.0754829	0.682076	0.495191	0.847362
ENSMUSG00000017667	430.096	0.0345516	0.0986998	0.350067	0.726288	0.933177
ENSMUSG00000017670	886.886	-0.0510541	0.112351	-0.454415	0.64953	0.905393
ENSMUSG00000017677	2402.1	0.277684	0.112024	2.47879	0.013183	0.214265
ENSMUSG00000017679	561.173	0.00399801	0.108574	0.0368229	0.970626	0.993323
ENSMUSG00000017686	832.881	-0.0655236	0.115614	-0.566743	0.570889	0.879129
ENSMUSG00000017692	41.6401	-0.274373	0.27191	-1.00906	0.312947	0.743059
ENSMUSG00000017697	301.696	-0.0166421	0.152446	-0.109167	0.91307	0.982674
ENSMUSG00000017707	5894.7	0.258999	0.101969	2.53998	0.0110858	0.199084
ENSMUSG00000017713	131.539	0.14314	0.187249	0.764437	0.444607	0.823199
ENSMUSG00000017715	1403.14	-0.0702026	0.0997604	-0.703712	0.481612	0.8402
ENSMUSG00000017716	864.016	0.21301	0.115964	1.83687	0.0662296	0.435519
ENSMUSG00000017718	77.5625	0.0862903	0.233281	0.369899	0.711458	0.931168
ENSMUSG00000017720	1.53864	-0.100537	1.12891	-0.0890564	0.929037	NA
ENSMUSG00000017721	2443.31	-0.0637786	0.088959	-0.716944	0.473409	0.837023
ENSMUSG00000017723	7035.66	-0.0110914	0.152333	-0.0728101	0.941957	0.988971
ENSMUSG00000017724	2462.22	-0.177865	0.108782	-1.63506	0.102036	0.512582
ENSMUSG00000017734	31.9686	0.207781	0.265886	0.781467	0.434528	0.818113
ENSMUSG00000017737	4425.31	-0.262145	0.431074	-0.608122	0.543107	0.867969
ENSMUSG00000017740	123.208	-0.370962	0.228736	-1.62179	0.104848	0.516858
ENSMUSG00000017747	353.721	0.0360146	0.101469	0.354931	0.722641	0.932856
ENSMUSG00000017754	340.04	0.550376	0.146599	3.75428	0.000173838	0.0207512
ENSMUSG00000017756	1634.34	-0.190523	0.0847256	-2.24871	0.024531	0.289939
ENSMUSG00000017760	4755.87	0.137642	0.0999034	1.37775	0.168281	0.617659
ENSMUSG00000017764	122.184	-0.299362	0.177353	-1.68794	0.091423	0.49157
ENSMUSG00000017765	859.581	-0.0433063	0.174692	-0.247901	0.804211	0.955848
ENSMUSG00000017767	0.837625	-0.0215122	1.74421	-0.0123335	0.99016	NA
ENSMUSG00000017774	3677.22	-0.0397774	0.120511	-0.330072	0.741345	0.937795
ENSMUSG00000017776	2378.52	-0.0313799	0.109818	-0.285744	0.775074	0.948748
ENSMUSG00000017778	939.84	-0.027339	0.171648	-0.159274	0.873453	0.972788
ENSMUSG00000017781	4559.26	-0.0103536	0.0611636	-0.169277	0.865579	0.970041
ENSMUSG00000017801	349.697	-0.163501	0.100052	-1.63416	0.102226	0.512595
ENSMUSG00000017802	1541.23	0.0348975	0.0908324	0.384197	0.700833	0.926241
ENSMUSG00000017817	177.53	0.072525	0.173949	0.416932	0.676728	0.916853
ENSMUSG00000017830	579.597	0.145614	0.219171	0.664384	0.506445	0.851694
ENSMUSG00000017831	976.945	-0.00216503	0.120063	-0.0180325	0.985613	0.997528
ENSMUSG00000017832	5.69423	0.373302	0.664883	0.561455	0.574487	NA
ENSMUSG00000017837	725.64	-0.228076	0.107298	-2.12563	0.0335343	0.336898
ENSMUSG00000017843	2828.78	0.0166258	0.0712762	0.233259	0.81556	0.958864
ENSMUSG00000017858	615.203	0.0149034	0.0965848	0.154304	0.87737	0.973844
ENSMUSG00000017861	265.736	0.258044	0.160993	1.60283	0.108973	0.52274
ENSMUSG00000017868	8.49148	-0.146506	0.631922	-0.231843	0.81666	NA
ENSMUSG00000017897	945.759	-0.288697	0.154081	-1.87367	0.0609758	0.423647
ENSMUSG00000017929	1970.88	0.0973018	0.120169	0.809707	0.418109	0.807784
ENSMUSG00000017943	0.996036	2.70243	1.53985	1.755	0.07926	NA
ENSMUSG00000017969	30.3233	0.276391	0.269706	1.02479	0.305464	0.738053
ENSMUSG00000017978	60.5079	-0.378404	0.201658	-1.87646	0.0605917	0.422285
ENSMUSG00000017999	1152.32	-0.0688594	0.0835757	-0.823916	0.409987	0.801667
ENSMUSG00000018001	1308.47	-0.0522539	0.108976	-0.479497	0.631585	0.899408
ENSMUSG00000018008	1713.5	0.0157026	0.117429	0.13372	0.893624	0.978223
ENSMUSG00000018012	156.23	-0.257862	0.144493	-1.7846	0.0743263	0.45509
ENSMUSG00000018040	793.554	-0.128821	0.100255	-1.28493	0.198818	0.651942
ENSMUSG00000018042	2754.12	-0.0585079	0.0758823	-0.771034	0.440687	0.821016
ENSMUSG00000018068	549.494	-0.108908	0.114644	-0.949966	0.34213	0.765731
ENSMUSG00000018076	1436.51	-0.0260421	0.105158	-0.247648	0.804407	0.955848
ENSMUSG00000018102	222.247	0.115734	0.151129	0.765792	0.4438	0.822615
ENSMUSG00000018126	4.88338	0.0873171	0.697818	0.125129	0.900422	NA
ENSMUSG00000018143	403.961	-0.111861	0.117343	-0.953281	0.340448	0.763705
ENSMUSG00000018160	1112.1	-0.0977447	0.0777359	-1.25739	0.208611	0.661221
ENSMUSG00000018166	339.055	-0.433774	0.365781	-1.18589	0.235668	0.684565
ENSMUSG00000018167	796.768	-0.0812419	0.0741664	-1.0954	0.273341	0.711817
ENSMUSG00000018168	36.058	0.445392	0.53949	0.82558	0.409042	0.801189
ENSMUSG00000018169	211.502	0.256528	0.147762	1.73608	0.082549	0.469618
ENSMUSG00000018171	3182.16	0.222984	0.094949	2.34847	0.0188509	0.257799
ENSMUSG00000018189	557.284	0.20408	0.146914	1.38911	0.164798	0.612866
ENSMUSG00000018196	415.129	0.0150778	0.11658	0.129334	0.897093	0.97864
ENSMUSG00000018199	856.397	0.17843	0.232865	0.766236	0.443536	0.822523
ENSMUSG00000018209	825.968	-0.0538732	0.106621	-0.505278	0.613364	0.892213
ENSMUSG00000018211	3.1214	-0.0533225	1.14867	-0.0464209	0.962975	NA
ENSMUSG00000018217	326.068	0.561781	0.19989	2.81045	0.00494724	0.132006
ENSMUSG00000018238	7.13786	0.324452	0.584503	0.55509	0.578833	NA
ENSMUSG00000018239	197.406	0.17944	0.130565	1.37434	0.169338	0.618466
ENSMUSG00000018286	2085.99	0.0830753	0.097767	0.849727	0.395477	0.795938
ENSMUSG00000018287	701.287	0.00470801	0.0936133	0.0502921	0.95989	0.990741
ENSMUSG00000018293	12562.8	0.057159	0.0606629	0.94224	0.34607	0.769253
ENSMUSG00000018322	952.591	-0.0770694	0.109227	-0.705591	0.480443	0.838899
ENSMUSG00000018326	4539.37	0.113832	0.077103	1.47636	0.139847	0.581063
ENSMUSG00000018334	404.084	0.148041	0.169132	0.875296	0.381413	0.787593
ENSMUSG00000018339	1644.99	0.294451	0.137954	2.13441	0.032809	0.333985
ENSMUSG00000018340	6284.35	0.00250324	0.0699891	0.0357661	0.971469	0.993435
ENSMUSG00000018341	3.70832	0.333663	0.794435	0.420001	0.674485	NA
ENSMUSG00000018347	300.271	0.0513621	0.141448	0.363115	0.716519	0.932014
ENSMUSG00000018362	1037	0.0607697	0.111564	0.544707	0.585955	0.884693
ENSMUSG00000018363	1635.02	-0.161824	0.0873816	-1.85192	0.0640372	0.430963
ENSMUSG00000018372	365.557	0.062681	0.0963294	0.650694	0.515244	0.855212
ENSMUSG00000018377	1476.11	0.0165694	0.095481	0.173536	0.86223	0.969295
ENSMUSG00000018378	1207.03	0.0392715	0.123207	0.318744	0.749921	0.941306
ENSMUSG00000018379	4304.26	0.139136	0.118112	1.178	0.238798	0.686133
ENSMUSG00000018381	66.2289	0.178588	0.216694	0.824148	0.409855	0.801667
ENSMUSG00000018387	230.945	-0.217598	0.111086	-1.95882	0.0501333	0.395702
ENSMUSG00000018395	839.442	-0.106517	0.0920686	-1.15693	0.247302	0.692086
ENSMUSG00000018398	2116.63	0.00122875	0.113132	0.0108612	0.991334	0.997728
ENSMUSG00000018401	1000.82	-0.190784	0.10276	-1.85659	0.0633692	0.429399
ENSMUSG00000018405	339.344	-0.011628	0.12619	-0.0921465	0.926582	0.985643
ENSMUSG00000018411	61.4843	-0.142588	0.225475	-0.632391	0.527132	0.862217
ENSMUSG00000018412	1415.73	-0.00935828	0.0866383	-0.108016	0.913983	0.983122
ENSMUSG00000018415	762.329	-0.221013	0.0861375	-2.56581	0.0102934	0.191748
ENSMUSG00000018417	1204.35	-0.123416	0.141856	-0.870014	0.384293	0.78896
ENSMUSG00000018425	923.466	0.115123	0.0904064	1.2734	0.202877	0.655461
ENSMUSG00000018427	126.054	0.0667754	0.163402	0.408656	0.682792	0.919413
ENSMUSG00000018428	733.877	-0.210856	0.104121	-2.0251	0.0428572	0.374636
ENSMUSG00000018433	684.524	-0.0745782	0.0965547	-0.772393	0.439882	0.820379
ENSMUSG00000018442	701.439	0.0981156	0.123245	0.796103	0.425972	0.812485
ENSMUSG00000018446	2166.32	0.0318364	0.120035	0.265226	0.790835	0.952884
ENSMUSG00000018449	248.94	-0.0259748	0.153093	-0.169667	0.865272	0.970034
ENSMUSG00000018451	2.9355	-0.0639965	0.865258	-0.0739623	0.94104	NA
ENSMUSG00000018459	30.037	0.470671	0.337808	1.39331	0.163526	0.611401
ENSMUSG00000018470	8.4845	1.28255	0.584729	2.19341	0.0282777	NA
ENSMUSG00000018474	3433.31	0.014749	0.125008	0.117985	0.90608	0.980504
ENSMUSG00000018476	1375.97	-0.143899	0.103024	-1.39675	0.162489	0.610338
ENSMUSG00000018479	4.6816	0.251956	0.87001	0.289602	0.772121	NA
ENSMUSG00000018481	1295.07	-0.162301	0.0949317	-1.70966	0.0873281	0.481207
ENSMUSG00000018500	41.3029	-0.332798	0.309878	-1.07396	0.282839	0.718314
ENSMUSG00000018501	2732.47	-0.170175	0.0977467	-1.74098	0.0816871	0.468166
ENSMUSG00000018507	265.911	-0.104767	0.117573	-0.891083	0.372885	0.784234
ENSMUSG00000018509	731.959	-0.00414457	0.134235	-0.0308754	0.975369	0.994715
ENSMUSG00000018537	1195.81	-0.148427	0.101545	-1.46168	0.143829	0.588733
ENSMUSG00000018541	507.345	-0.0734114	0.0976294	-0.751939	0.452088	0.828047
ENSMUSG00000018543	7.18663	-0.483414	0.563143	-0.85842	0.39066	NA
ENSMUSG00000018547	2131.64	-0.266767	0.0698169	-3.82095	0.000132937	0.0177215
ENSMUSG00000018548	727.761	0.0121804	0.0893615	0.136305	0.89158	0.977607
ENSMUSG00000018554	5.13545	0.364721	0.624559	0.583966	0.559243	NA
ENSMUSG00000018559	1739.03	-0.054925	0.0781271	-0.703021	0.482043	0.84045
ENSMUSG00000018565	883.544	-0.0837925	0.079892	-1.04882	0.29426	0.727983
ENSMUSG00000018566	49.2779	0.156109	0.348431	0.448035	0.654128	0.907609
ENSMUSG00000018567	4325.65	0.0515482	0.0892941	0.577285	0.563747	0.876504
ENSMUSG00000018569	864.904	-0.153632	0.432327	-0.35536	0.72232	0.932856
ENSMUSG00000018570	149.175	-0.110223	0.171419	-0.643003	0.520222	0.858001
ENSMUSG00000018572	1482.49	-0.129827	0.0617123	-2.10374	0.0354012	0.345748
ENSMUSG00000018574	625.44	-0.110699	0.122267	-0.90539	0.365259	0.780217
ENSMUSG00000018581	1.75388	-1.15983	1.27564	-0.909211	0.363239	NA
ENSMUSG00000018583	5794.35	-0.042565	0.0596255	-0.713872	0.475306	0.837335
ENSMUSG00000018585	1210.42	0.0571413	0.117554	0.486087	0.626905	0.896785
ENSMUSG00000018593	17993.9	0.209077	0.0889045	2.3517	0.0186877	0.25703
ENSMUSG00000018595	1.40886	-1.2283	1.28742	-0.954077	0.340045	NA
ENSMUSG00000018599	176.321	0.173584	0.158701	1.09378	0.274052	0.711878
ENSMUSG00000018604	79.5801	-0.165167	0.286183	-0.577139	0.563846	0.876559
ENSMUSG00000018623	0.217809	-0.166894	3.16075	-0.0528022	0.95789	NA
ENSMUSG00000018648	113.024	-0.425953	0.145369	-2.93014	0.00338806	0.111416
ENSMUSG00000018651	456.589	-0.0449129	0.101748	-0.441411	0.658916	0.910698
ENSMUSG00000018654	337.664	0.0904397	0.144597	0.62546	0.531669	0.863375
ENSMUSG00000018656	0.979429	-0.8181	1.78501	-0.458317	0.646725	NA
ENSMUSG00000018659	302.809	-0.0889955	0.130095	-0.684082	0.493923	0.846237
ENSMUSG00000018661	510.012	-0.227448	0.131478	-1.72994	0.0836411	0.470999
ENSMUSG00000018666	1784.58	0.0844951	0.086626	0.975401	0.329361	0.754829
ENSMUSG00000018669	1338.27	-0.0198637	0.135626	-0.14646	0.883558	0.974362
ENSMUSG00000018672	263.995	0.296935	0.136374	2.17735	0.0294542	0.316063
ENSMUSG00000018677	2461.04	-0.0455331	0.0728176	-0.625304	0.531772	0.863375
ENSMUSG00000018678	364.336	-0.111326	0.156403	-0.711792	0.476593	0.837401
ENSMUSG00000018697	922.589	-0.0333889	0.106896	-0.312349	0.754775	0.942909
ENSMUSG00000018707	9359.84	-0.134197	0.0888253	-1.51079	0.130841	0.566515
ENSMUSG00000018727	25.3259	-0.119159	0.324396	-0.367327	0.713375	0.931875
ENSMUSG00000018733	181.259	-0.0226283	0.121936	-0.185575	0.852778	0.966395
ENSMUSG00000018736	1237.54	-0.132184	0.0792509	-1.66792	0.095332	0.498184
ENSMUSG00000018740	62.6796	0.148506	0.360852	0.411544	0.680674	0.918251
ENSMUSG00000018750	1103.3	-0.274668	0.105722	-2.59803	0.00937593	0.183881
ENSMUSG00000018752	5.12183	0.682416	0.69971	0.975285	0.329419	NA
ENSMUSG00000018761	918.009	0.0524316	0.108486	0.483301	0.628882	0.897736
ENSMUSG00000018765	2204.8	-0.183819	0.0791953	-2.32109	0.0202819	0.264772
ENSMUSG00000018770	2573.28	0.212019	0.130388	1.62606	0.103938	0.514528
ENSMUSG00000018774	1232.9	0.341938	0.154396	2.21469	0.0267815	0.302115
ENSMUSG00000018796	264.259	-0.147696	0.19163	-0.770735	0.440864	0.821151
ENSMUSG00000018800	35.1808	-0.37848	0.259479	-1.45861	0.144672	0.58992
ENSMUSG00000018809	157.408	0.0603925	0.144115	0.419057	0.675175	0.915912
ENSMUSG00000018819	3107.65	-0.0536575	0.129553	-0.414173	0.678747	0.917615
ENSMUSG00000018820	1064.02	-0.10834	0.0912315	-1.18753	0.23502	0.684521
ENSMUSG00000018821	400.889	-0.0725847	0.137815	-0.526681	0.598415	0.887701
ENSMUSG00000018822	4.55009	-0.69445	0.67455	-1.0295	0.303244	NA
ENSMUSG00000018830	82.1388	-0.0673447	0.270555	-0.248913	0.803428	0.955724
ENSMUSG00000018841	288.24	-0.135908	0.136228	-0.997649	0.318449	0.746403
ENSMUSG00000018844	2.60078	-0.420532	0.890545	-0.472219	0.636771	NA
ENSMUSG00000018845	101.64	0.143741	0.280673	0.512131	0.60856	0.891491
ENSMUSG00000018846	1317.42	0.00609491	0.177276	0.0343809	0.972573	0.993645
ENSMUSG00000018848	2021.71	0.0164176	0.0694721	0.236319	0.813185	0.957541
ENSMUSG00000018849	967.644	-0.449608	0.148199	-3.03382	0.00241477	0.0929955
ENSMUSG00000018858	383.939	0.0490758	0.113718	0.431556	0.666064	0.912842
ENSMUSG00000018861	230.874	0.158306	0.135	1.17263	0.240943	0.687361
ENSMUSG00000018865	1.33745	1.4807	1.86301	0.794787	0.426738	NA
ENSMUSG00000018882	682.898	0.08129	0.101332	0.802215	0.422429	0.809866
ENSMUSG00000018893	156.803	0.102573	0.562747	0.182272	0.855369	0.966801
ENSMUSG00000018899	3277.65	-0.0653614	0.14259	-0.458388	0.646674	0.904417
ENSMUSG00000018900	268.044	-0.0469704	0.118255	-0.397196	0.691223	0.922961
ENSMUSG00000018906	1117.33	0.0604289	0.141927	0.425774	0.670272	0.913912
ENSMUSG00000018907	2.23774	-0.55972	1.10975	-0.504363	0.614006	NA
ENSMUSG00000018909	623.108	0.0215675	0.147519	0.146201	0.883763	0.974362
ENSMUSG00000018914	2.33481	-0.668601	1.00989	-0.662056	0.507935	NA
ENSMUSG00000018916	13.6631	-1.03011	0.404868	-2.54431	0.0109494	NA
ENSMUSG00000018919	4.6003	0.282791	0.624278	0.452989	0.650556	NA
ENSMUSG00000018920	1413.64	0.0717125	0.125523	0.571308	0.567791	0.878163
ENSMUSG00000018921	1254.54	-0.0366528	0.0908592	-0.403402	0.686652	0.921769
ENSMUSG00000018923	284.129	-0.122866	0.121179	-1.01393	0.310618	0.742939
ENSMUSG00000018924	203.284	1.54236	0.879555	1.75357	0.0795039	0.465113
ENSMUSG00000018925	4.00874	0.172366	0.807168	0.213545	0.830902	NA
ENSMUSG00000018927	2410.03	0.57109	0.308625	1.85044	0.0642507	0.431366
ENSMUSG00000018930	58.308	0.320459	0.21141	1.51582	0.129566	0.564299
ENSMUSG00000018931	442.201	-0.288832	0.123459	-2.3395	0.0193094	0.259944
ENSMUSG00000018932	1784.72	-0.156873	0.0804494	-1.94995	0.0511816	0.397431
ENSMUSG00000018965	3385.18	0.0464115	0.117598	0.394662	0.693092	0.923011
ENSMUSG00000018974	1277.95	-0.047435	0.0951212	-0.49868	0.618005	0.894832
ENSMUSG00000018983	201.693	0.100246	0.146212	0.685616	0.492955	0.845624
ENSMUSG00000018986	176.249	-0.211434	0.166919	-1.26668	0.205269	0.656481
ENSMUSG00000018995	150.762	-0.0181456	0.136831	-0.132613	0.894499	0.978455
ENSMUSG00000018999	478.881	-0.0563294	0.0938675	-0.600095	0.548443	0.870214
ENSMUSG00000019027	2.89443	-0.270722	0.865905	-0.312646	0.754549	NA
ENSMUSG00000019039	639.266	-0.101624	0.11838	-0.858458	0.39064	0.793761
ENSMUSG00000019054	1680.92	-0.0329647	0.0899021	-0.366673	0.713863	0.931939
ENSMUSG00000019055	1559.38	0.14285	0.120988	1.1807	0.237723	0.685739
ENSMUSG00000019066	763.848	-0.111932	0.0802883	-1.39413	0.163279	0.611218
ENSMUSG00000019080	79.8416	-0.0367495	0.19262	-0.190788	0.848692	0.965495
ENSMUSG00000019082	893.803	-0.20033	0.103799	-1.92997	0.0536102	0.405042
ENSMUSG00000019087	2932.96	0.08663	0.0882215	0.98196	0.326119	0.752115
ENSMUSG00000019088	340.993	0.257297	0.112528	2.28652	0.0222239	0.275346
ENSMUSG00000019102	38.8304	0.869437	0.326271	2.66477	0.00770411	0.166112
ENSMUSG00000019122	898.009	0.440305	0.352611	1.2487	0.211775	0.664983
ENSMUSG00000019124	143.141	0.14627	0.170003	0.860395	0.389572	0.793218
ENSMUSG00000019132	4241.31	0.227431	0.129758	1.75273	0.0796477	0.465159
ENSMUSG00000019139	1903.12	-0.147015	0.100823	-1.45815	0.144799	0.590157
ENSMUSG00000019143	529.347	0.122222	0.0983904	1.24222	0.214157	0.666308
ENSMUSG00000019158	256.752	0.116627	0.11433	1.0201	0.307683	0.740704
ENSMUSG00000019173	3946.51	-0.0991055	0.0713223	-1.38954	0.164667	0.612684
ENSMUSG00000019178	20.4953	0.136738	0.36061	0.379185	0.70455	NA
ENSMUSG00000019179	4089.56	-0.00657785	0.0792882	-0.0829612	0.933882	0.987515
ENSMUSG00000019188	3112.99	0.0271947	0.0692507	0.392699	0.694542	0.923215
ENSMUSG00000019189	2702.22	-0.21009	0.0597124	-3.51836	0.000434223	0.0336423
ENSMUSG00000019194	271.13	-0.0122073	0.180426	-0.0676581	0.946058	0.989056
ENSMUSG00000019210	1540.48	-0.0305295	0.0953277	-0.320258	0.748773	0.940504
ENSMUSG00000019214	274.936	0.185735	0.164916	1.12624	0.260065	0.701604
ENSMUSG00000019230	14.105	-0.982447	0.582775	-1.68581	0.0918326	NA
ENSMUSG00000019232	0.298303	-0.743963	3.16075	-0.235376	0.813917	NA
ENSMUSG00000019235	36.5524	-0.137605	0.253854	-0.542065	0.587774	0.884693
ENSMUSG00000019254	1425.74	0.0214646	0.071274	0.301156	0.763295	0.945357
ENSMUSG00000019256	1162.35	0.271597	0.130844	2.07573	0.0379193	0.35611
ENSMUSG00000019261	1445.35	-0.0443921	0.102727	-0.432136	0.665642	0.912806
ENSMUSG00000019278	35.8612	0.658062	0.326158	2.01762	0.0436309	0.378062
ENSMUSG00000019295	294.19	-0.0779243	0.105405	-0.739288	0.459732	0.831739
ENSMUSG00000019297	551.399	-0.0428909	0.0876497	-0.489344	0.624598	0.896127
ENSMUSG00000019301	11.3485	-0.518976	0.492382	-1.05401	0.291878	NA
ENSMUSG00000019302	1181.14	-0.103374	0.104285	-0.991256	0.321561	0.748634
ENSMUSG00000019303	120.83	-0.13774	0.186403	-0.738938	0.459945	0.831739
ENSMUSG00000019312	848.99	-0.298002	0.394364	-0.75565	0.449859	0.826401
ENSMUSG00000019320	10.9609	-0.0453026	0.493896	-0.0917249	0.926917	NA
ENSMUSG00000019326	185.537	-0.0255553	0.157047	-0.162723	0.870736	0.971718
ENSMUSG00000019338	1059.51	-0.231069	0.127253	-1.81583	0.0693967	0.443167
ENSMUSG00000019359	30.0378	0.30085	0.372169	0.80837	0.418878	0.808251
ENSMUSG00000019362	1336.53	0.0480475	0.125533	0.382747	0.701908	0.926874
ENSMUSG00000019370	3476.16	-0.17697	0.0854456	-2.07114	0.0383459	0.358687
ENSMUSG00000019373	603.732	0.136942	0.119508	1.14587	0.251847	0.694709
ENSMUSG00000019428	4684.58	-0.0786721	0.083234	-0.945192	0.344561	0.768129
ENSMUSG00000019432	6216.49	0.0768799	0.0856869	0.897219	0.369602	0.782669
ENSMUSG00000019433	1628.63	-0.102445	0.0843916	-1.21393	0.224774	0.676877
ENSMUSG00000019437	141.716	-0.0461817	0.184136	-0.250801	0.801968	0.95541
ENSMUSG00000019461	2537.53	-0.275393	0.0956291	-2.87981	0.00397917	0.11955
ENSMUSG00000019464	24.3779	0.188637	0.306497	0.615462	0.53825	0.865897
ENSMUSG00000019467	2049.51	-0.0292167	0.106905	-0.273297	0.784625	0.951466
ENSMUSG00000019470	1227.4	-0.0777616	0.105443	-0.737479	0.460831	0.83204
ENSMUSG00000019471	4666.9	-0.0422124	0.07775	-0.542924	0.587182	0.884693
ENSMUSG00000019478	179.06	-0.419488	0.146061	-2.87201	0.0040787	0.11955
ENSMUSG00000019487	1366.71	-0.1124	0.0884224	-1.27117	0.203669	0.655681
ENSMUSG00000019489	0.569978	1.47955	2.49364	0.593329	0.552961	NA
ENSMUSG00000019494	1667.68	0.164211	0.0693177	2.36896	0.0178383	0.250354
ENSMUSG00000019505	8884.9	-0.149212	0.112202	-1.32985	0.183568	0.632601
ENSMUSG00000019518	413.952	0.0686529	0.129284	0.531025	0.595401	0.887491
ENSMUSG00000019528	818.013	-0.0535715	0.0973243	-0.550443	0.582015	0.881961
ENSMUSG00000019539	326.037	-0.0013262	0.181418	-0.00731018	0.994167	0.998896
ENSMUSG00000019558	830.132	-0.00363402	0.115515	-0.0314593	0.974903	0.99471
ENSMUSG00000019564	234.931	0.222736	0.120911	1.84214	0.0654544	0.434191
ENSMUSG00000019577	206.681	0.57766	0.518732	1.1136	0.265451	0.705843
ENSMUSG00000019578	202.173	-0.237535	0.143054	-1.66046	0.0968218	0.501996
ENSMUSG00000019579	1344	0.0586625	0.0888706	0.660089	0.509197	0.852827
ENSMUSG00000019590	1392.53	-0.00469401	0.0938647	-0.0500083	0.960116	0.990741
ENSMUSG00000019647	219.697	0.340959	0.177085	1.9254	0.0541799	0.405497
ENSMUSG00000019659	1027.63	-0.0593712	0.0980993	-0.605216	0.545036	0.868495
ENSMUSG00000019689	140.889	-0.23249	0.198757	-1.16972	0.242115	0.687639
ENSMUSG00000019699	1233.55	-0.0377471	0.0936266	-0.403167	0.686825	0.921785
ENSMUSG00000019710	960.797	-0.0747797	0.0842923	-0.887148	0.374999	0.785584
ENSMUSG00000019715	809.833	0.0402326	0.0739219	0.544258	0.586264	0.884693
ENSMUSG00000019718	286.406	-0.146043	0.117314	-1.24489	0.213173	0.665186
ENSMUSG00000019726	1493.73	-0.276655	0.172749	-1.60148	0.10927	0.523286
ENSMUSG00000019731	1023.39	-0.138257	0.0869117	-1.59077	0.11166	0.527935
ENSMUSG00000019732	90.2746	0.00953258	0.159004	0.0599518	0.952194	0.989158
ENSMUSG00000019734	1494.12	-0.193601	0.103392	-1.87249	0.0611388	0.423973
ENSMUSG00000019737	768.034	0.0669423	0.150832	0.443819	0.657174	0.90965
ENSMUSG00000019738	245.071	0.0392067	0.116173	0.337485	0.735752	0.93644
ENSMUSG00000019761	58.1778	-0.227106	0.266657	-0.851678	0.394393	0.794748
ENSMUSG00000019762	6.10588	-0.264718	0.763049	-0.346921	0.728651	NA
ENSMUSG00000019763	296.714	0.0619386	0.130194	0.475742	0.634258	0.900465
ENSMUSG00000019767	1.55288	0.432007	1.44755	0.29844	0.765367	NA
ENSMUSG00000019768	324.537	-0.0336778	0.163971	-0.205389	0.837269	0.962599
ENSMUSG00000019773	290.541	0.199003	0.121983	1.6314	0.102807	0.513996
ENSMUSG00000019774	189.862	-0.185312	0.123915	-1.49548	0.134789	0.57332
ENSMUSG00000019777	2110.79	-0.0359384	0.0841097	-0.42728	0.669175	0.913469
ENSMUSG00000019779	462.282	0.0579587	0.143897	0.402778	0.687111	0.921785
ENSMUSG00000019782	452.27	0.186699	0.123861	1.50733	0.131726	0.568042
ENSMUSG00000019787	130.238	1.11625	0.648255	1.72192	0.0850834	0.474068
ENSMUSG00000019789	4.16882	0.45851	0.698391	0.656523	0.511487	NA
ENSMUSG00000019790	627.328	-0.157397	0.131925	-1.19307	0.23284	0.683814
ENSMUSG00000019791	115.106	-0.0262792	0.199718	-0.131582	0.895315	0.978565
ENSMUSG00000019792	199.037	0.0649904	0.141606	0.458951	0.646269	0.904308
ENSMUSG00000019794	521.309	0.0504134	0.114982	0.438445	0.661063	0.911304
ENSMUSG00000019795	1126.32	-0.0543599	0.0768921	-0.706964	0.479589	0.838147
ENSMUSG00000019796	37.6624	0.219863	0.31271	0.703089	0.482	0.84045
ENSMUSG00000019797	280.871	0.0630709	0.164694	0.382957	0.701752	0.926844
ENSMUSG00000019802	2201.19	0.0449442	0.0609331	0.737598	0.460759	0.83204
ENSMUSG00000019804	2353.62	-0.0509961	0.075354	-0.676754	0.498562	0.848011
ENSMUSG00000019806	1070.04	-0.084891	0.0729078	-1.16436	0.244278	0.68931
ENSMUSG00000019808	146.117	-0.153224	0.151327	-1.01254	0.31128	0.742939
ENSMUSG00000019809	547.433	-0.0420132	0.106394	-0.394885	0.692928	0.922961
ENSMUSG00000019810	1041.06	0.000243723	0.0801173	0.00304208	0.997573	0.999498
ENSMUSG00000019813	186.435	0.196864	0.137121	1.43569	0.15109	0.598099
ENSMUSG00000019814	486.664	0.0170179	0.102711	0.165687	0.868404	0.971047
ENSMUSG00000019817	45.1343	-0.325782	0.354719	-0.918422	0.358398	0.777373
ENSMUSG00000019818	4064.8	0.117693	0.164406	0.715867	0.474073	0.837186
ENSMUSG00000019820	1346.66	-0.171322	0.112968	-1.51656	0.129379	0.564299
ENSMUSG00000019822	558.364	-0.0688293	0.111041	-0.619853	0.535355	0.86414
ENSMUSG00000019823	183.729	0.201703	0.162143	1.24398	0.213507	0.665186
ENSMUSG00000019826	296.58	-0.0873046	0.109293	-0.798809	0.424401	0.811428
ENSMUSG00000019828	0.229912	0.987247	3.16075	0.312346	0.754777	NA
ENSMUSG00000019831	198.667	-0.255562	0.174222	-1.46687	0.14241	0.585347
ENSMUSG00000019832	296.77	0.52269	0.182802	2.85933	0.00424537	0.122372
ENSMUSG00000019836	13.7306	-0.253139	0.417725	-0.605995	0.544518	NA
[truncated: 23,023 more rows]

## Sheet: WF1 Exp1
	baseMean	log2FoldChange	lfcSE	stat	pvalue	padj
ENSMUSG00000051951	0.224172	1.10814	4.99497	0.22185	0.82443	NA
ENSMUSG00000025902	55.9979	-0.364042	0.468549	-0.776956	0.437185	0.999783
ENSMUSG00000102269	4.09249	0.510861	1.67601	0.304808	0.760513	NA
ENSMUSG00000104328	0.510447	-0.351662	4.68284	-0.075096	0.940138	NA
ENSMUSG00000098104	24.7726	-0.415302	0.700559	-0.592815	0.553305	0.999783
ENSMUSG00000102175	2.44933	0.250527	2.02323	0.123825	0.901454	NA
ENSMUSG00000103265	0.504166	-0.371627	4.70508	-0.0789843	0.937045	NA
ENSMUSG00000103922	8.53948	-0.353231	1.10229	-0.320452	0.748625	0.999783
ENSMUSG00000033845	508.075	0.368049	0.23337	1.57711	0.114771	0.950212
ENSMUSG00000102275	16.7173	0.65299	0.844697	0.773047	0.439495	0.999783
ENSMUSG00000025903	124.368	1.29323	0.452065	2.86072	0.00422674	0.283801
ENSMUSG00000033813	286.209	0.14752	0.264999	0.556683	0.577744	0.999783
ENSMUSG00000062588	19.3482	-0.0547267	0.748119	-0.0731524	0.941685	0.999783
ENSMUSG00000103280	2.73874	-0.089874	1.88492	-0.0476805	0.961971	NA
ENSMUSG00000002459	13.2406	0.418091	0.984826	0.424533	0.671177	0.999783
ENSMUSG00000085623	0.224172	1.10814	4.99497	0.22185	0.82443	NA
ENSMUSG00000033793	456.816	0.316266	0.257284	1.22925	0.218977	0.999783
ENSMUSG00000025907	278.357	0.310487	0.278509	1.11482	0.264928	0.999783
ENSMUSG00000090031	22.7604	0.31426	0.69674	0.451043	0.651958	0.999783
ENSMUSG00000103355	0.224172	1.10814	4.99497	0.22185	0.82443	NA
ENSMUSG00000103845	0.504166	-0.371627	4.70508	-0.0789843	0.937045	NA
ENSMUSG00000033740	0.796723	-1.3576	3.88468	-0.349476	0.726732	NA
ENSMUSG00000102135	45.1779	-0.430169	0.51051	-0.842626	0.399437	0.999783
ENSMUSG00000051285	298.145	-0.0786996	0.25308	-0.310967	0.755825	0.999783
ENSMUSG00000098201	0.217891	1.08747	4.99644	0.217648	0.827703	NA
ENSMUSG00000103509	1.94201	0.390334	2.23189	0.17489	0.861166	NA
ENSMUSG00000097797	9.52653	-0.19647	1.06655	-0.184211	0.853848	0.999783
ENSMUSG00000086235	0.442063	2.09356	4.84279	0.432305	0.66552	NA
ENSMUSG00000084353	7.1702	-0.0494599	1.20682	-0.0409837	0.967309	0.999783
ENSMUSG00000103933	2.62937	-1.54801	2.13642	-0.724583	0.468708	NA
ENSMUSG00000061024	445.477	-0.279331	0.231949	-1.20428	0.228483	0.999783
ENSMUSG00000025911	46.4759	-0.330751	0.506231	-0.65336	0.513524	0.999783
ENSMUSG00000079671	20.5071	0.593256	0.752068	0.788833	0.43021	0.999783
ENSMUSG00000081441	0.712642	0.639729	4.04929	0.157985	0.874468	NA
ENSMUSG00000067879	0.563136	-2.79197	4.39419	-0.635378	0.525182	NA
ENSMUSG00000025912	20.6778	0.386801	0.753909	0.51306	0.607909	0.999783
ENSMUSG00000045210	226.856	0.537309	0.307275	1.74862	0.0803562	0.896628
ENSMUSG00000097893	1.1083	3.41924	3.30448	1.03473	0.300796	NA
ENSMUSG00000025915	133.673	0.144092	0.344927	0.417747	0.676132	0.999783
ENSMUSG00000046334	8.88663	1.56405	1.13389	1.37937	0.16778	0.995002
ENSMUSG00000088916	0.224172	1.10814	4.99497	0.22185	0.82443	NA
ENSMUSG00000046101	1.38516	1.98189	2.89612	0.684325	0.49377	NA
ENSMUSG00000098234	401.787	0.310295	0.236119	1.31415	0.188796	0.999783
ENSMUSG00000093178	2.93865	3.22964	2.26926	1.42321	0.154675	NA
ENSMUSG00000099032	0.787308	-1.33807	3.61897	-0.369736	0.711579	NA
ENSMUSG00000025916	1.88932	1.23582	2.3079	0.535473	0.592323	NA
ENSMUSG00000025917	860.415	0.17618	0.207921	0.847339	0.396806	0.999783
ENSMUSG00000056763	191.23	0.213475	0.294805	0.724123	0.46899	0.999783
ENSMUSG00000067851	574.993	0.101576	0.253682	0.400408	0.688856	0.999783
ENSMUSG00000102556	0.224172	1.10814	4.99497	0.22185	0.82443	NA
ENSMUSG00000048960	36.5025	0.763782	0.565887	1.34971	0.17711	0.998993
ENSMUSG00000093864	0.286275	-1.80911	4.99453	-0.362219	0.717189	NA
ENSMUSG00000097628	0.722057	0.618317	4.02924	0.153458	0.878037	NA
ENSMUSG00000016918	69.4346	-0.94933	0.451011	-2.10489	0.0353008	0.736134
ENSMUSG00000025938	26.5056	-0.421664	0.695011	-0.606702	0.544049	0.999783
ENSMUSG00000005886	254.079	-0.134068	0.272204	-0.492529	0.622346	0.999783
ENSMUSG00000103506	0.435781	2.07482	4.89366	0.423982	0.671579	NA
ENSMUSG00000103495	0.276861	-1.78479	4.99626	-0.357225	0.720923	NA
ENSMUSG00000099183	0.217891	1.08747	4.99644	0.217648	0.827703	NA
ENSMUSG00000104170	0.659953	2.67231	4.08735	0.653799	0.513241	NA
ENSMUSG00000103085	2.1756	0.645087	2.12667	0.303331	0.761637	NA
ENSMUSG00000025935	782.678	0.457019	0.227482	2.00904	0.0445334	0.777304
ENSMUSG00000025937	135.118	0.259605	0.340143	0.763222	0.445331	0.999783
ENSMUSG00000102982	0.217891	1.08747	4.99644	0.217648	0.827703	NA
ENSMUSG00000097711	1.98529	-0.337759	2.40826	-0.14025	0.888462	NA
ENSMUSG00000025932	108.258	-0.494705	0.362532	-1.36458	0.172384	0.996421
ENSMUSG00000095853	0.286275	-1.80911	4.99453	-0.362219	0.717189	NA
ENSMUSG00000102588	0.276861	-1.78479	4.99626	-0.357225	0.720923	NA
ENSMUSG00000054493	0.224172	1.10814	4.99497	0.22185	0.82443	NA
ENSMUSG00000025930	3.99969	1.36342	1.65802	0.822321	0.410894	NA
ENSMUSG00000081201	0.217891	1.08747	4.99644	0.217648	0.827703	NA
ENSMUSG00000082193	6.29967	1.45757	1.34341	1.08498	0.277929	0.999783
ENSMUSG00000073737	0.224172	1.10814	4.99497	0.22185	0.82443	NA
ENSMUSG00000025925	220.493	0.344072	0.290853	1.18298	0.236819	0.999783
ENSMUSG00000104379	0.563136	-2.79197	4.39419	-0.635378	0.525182	NA
ENSMUSG00000032719	2.12206	-1.92747	2.23507	-0.862374	0.388482	NA
ENSMUSG00000067795	4.10801	-0.720427	1.60477	-0.448928	0.653483	NA
ENSMUSG00000043716	14272.3	0.157443	0.18887	0.833606	0.404503	0.999783
ENSMUSG00000025921	806.663	-0.248941	0.264674	-0.940556	0.346932	0.999783
ENSMUSG00000100868	0.224172	1.10814	4.99497	0.22185	0.82443	NA
ENSMUSG00000025920	223.117	-0.28046	0.276044	-1.016	0.309631	0.999783
ENSMUSG00000089982	0.448344	2.1121	4.89091	0.431841	0.665857	NA
ENSMUSG00000025939	249.723	0.420406	0.334	1.2587	0.208139	0.999783
ENSMUSG00000102457	1.35044	-2.34065	2.93751	-0.796814	0.425559	NA
ENSMUSG00000079658	590.278	0.860299	0.247343	3.47816	0.000504871	0.0835669
ENSMUSG00000100959	0.224172	1.10814	4.99497	0.22185	0.82443	NA
ENSMUSG00000025940	232.165	0.559831	0.30802	1.81751	0.0691385	0.870049
ENSMUSG00000025779	34.9448	0.807902	0.645654	1.25129	0.210828	0.999783
ENSMUSG00000091020	8.91774	-1.59901	1.15342	-1.38632	0.16565	0.992833
ENSMUSG00000042686	1.8082	-0.758192	2.5061	-0.302539	0.762241	NA
ENSMUSG00000101589	14.0611	0.10556	0.873872	0.120796	0.903853	0.999783
ENSMUSG00000067780	3.14941	0.331354	1.83393	0.18068	0.856619	NA
ENSMUSG00000100053	0.217891	1.08747	4.99644	0.217648	0.827703	NA
ENSMUSG00000099591	0.435781	2.07482	4.89366	0.423982	0.671579	NA
ENSMUSG00000100720	0.286275	-1.80911	4.99453	-0.362219	0.717189	NA
ENSMUSG00000100204	3.09672	0.823586	1.83555	0.448685	0.653659	NA
ENSMUSG00000043760	0.224172	1.10814	4.99497	0.22185	0.82443	NA
ENSMUSG00000090142	0.276861	-1.78479	4.99626	-0.357225	0.720923	NA
ENSMUSG00000099906	1.09573	3.40425	3.35429	1.01489	0.310156	NA
ENSMUSG00000065559	0.224172	1.10814	4.99497	0.22185	0.82443	NA
ENSMUSG00000041872	1.22622	0.198831	3.18511	0.0624251	0.950224	NA
ENSMUSG00000041859	1227.54	0.175695	0.208144	0.844105	0.398611	0.999783
ENSMUSG00000097934	1.07672	-1.96036	3.46297	-0.566092	0.571331	NA
ENSMUSG00000025931	42.9524	-1.22562	0.556232	-2.20343	0.0275642	0.692135
ENSMUSG00000041809	7.62065	-1.4944	1.20258	-1.24266	0.213994	0.999783
ENSMUSG00000041779	415.143	0.0458533	0.287981	0.159223	0.873493	0.999783
ENSMUSG00000025933	25.4778	0.331361	0.67974	0.487483	0.625916	0.999783
ENSMUSG00000025934	0.725205	0.675122	4.02283	0.167823	0.866723	NA
ENSMUSG00000096375	1.0052	-0.349203	3.00405	-0.116244	0.907459	NA
ENSMUSG00000067750	0.224172	1.10814	4.99497	0.22185	0.82443	NA
ENSMUSG00000085079	0.777894	-1.31633	3.91919	-0.335868	0.73697	NA
ENSMUSG00000028033	1.83664	2.45233	2.62587	0.933913	0.350349	NA
ENSMUSG00000082935	132.79	0.762639	0.354788	2.14956	0.0315898	0.716522
ENSMUSG00000097970	1.28519	-0.956456	2.8904	-0.330908	0.740714	NA
ENSMUSG00000100775	0.896688	3.11246	3.96648	0.784692	0.432634	NA
ENSMUSG00000026158	128.362	0.317868	0.378104	0.840689	0.400522	0.999783
ENSMUSG00000026156	12.2866	-0.289654	0.923544	-0.313633	0.7538	0.999783
ENSMUSG00000026155	103.451	-0.509582	0.440128	-1.1578	0.246944	0.999783
ENSMUSG00000026154	116.263	0.215427	0.359766	0.598797	0.549308	0.999783
ENSMUSG00000026153	83.9924	0.538227	0.405547	1.32716	0.184455	0.999783
ENSMUSG00000026147	11.0819	2.19996	1.08758	2.0228	0.0430934	0.767444
ENSMUSG00000099997	2.33454	1.67562	2.27933	0.735136	0.462257	NA
ENSMUSG00000101939	9.22629	1.39681	1.16951	1.19435	0.232342	0.999783
ENSMUSG00000101111	3.47336	0.0638535	1.70337	0.0374867	0.970097	NA
ENSMUSG00000100862	3.86273	0.78263	1.67123	0.468295	0.639573	NA
ENSMUSG00000102070	4.61532	-0.671018	1.52905	-0.438847	0.660772	NA
ENSMUSG00000101249	2.39351	0.904051	2.2582	0.400342	0.688905	NA
ENSMUSG00000073725	245.62	0.532805	0.27195	1.9592	0.0500893	0.807963
ENSMUSG00000033569	0.217891	1.08747	4.99644	0.217648	0.827703	NA
ENSMUSG00000086240	14.5716	0.101722	0.873676	0.116431	0.907311	0.999783
ENSMUSG00000099492	52.7232	-0.270527	0.497112	-0.544197	0.586306	0.999783
ENSMUSG00000100261	5.34613	-0.759444	1.39192	-0.545611	0.585334	NA
ENSMUSG00000101180	0.224172	1.10814	4.99497	0.22185	0.82443	NA
ENSMUSG00000048874	835.93	-0.225827	0.211558	-1.06745	0.285769	0.999783
ENSMUSG00000103783	1.82722	2.46585	2.63051	0.937404	0.348551	NA
ENSMUSG00000104315	1.28834	-0.911983	2.887	-0.315893	0.752083	NA
ENSMUSG00000026064	3.16825	0.34413	1.80868	0.190266	0.8491	NA
ENSMUSG00000117310	0.501033	-0.328159	4.71632	-0.0695794	0.944528	NA
ENSMUSG00000070960	21.8813	-0.556162	0.739787	-0.751788	0.452179	0.999783
ENSMUSG00000100481	10.0583	-0.356377	1.02865	-0.346451	0.729004	0.999783
ENSMUSG00000026134	151.753	0.0945254	0.318026	0.297225	0.766294	0.999783
ENSMUSG00000102714	0.553722	-2.76995	4.84634	-0.571556	0.567623	NA
ENSMUSG00000103746	2.73245	-0.0953864	1.8978	-0.0502616	0.959914	NA
ENSMUSG00000004768	175.09	-0.102032	0.29746	-0.343011	0.73159	0.999783
ENSMUSG00000042215	288.524	0.0947957	0.261276	0.362818	0.716741	0.999783
ENSMUSG00000103072	0.781027	-1.35463	3.6292	-0.373258	0.708956	NA
ENSMUSG00000042197	451.117	0.203664	0.247866	0.821671	0.411264	0.999783
ENSMUSG00000081402	9.04679	-0.349208	1.0677	-0.327066	0.743618	0.999783
ENSMUSG00000042182	28.5077	0.156476	0.629232	0.248678	0.80361	0.999783
ENSMUSG00000026131	1778.59	-0.12348	0.24717	-0.499576	0.617374	0.999783
ENSMUSG00000103596	0.286275	-1.80911	4.99453	-0.362219	0.717189	NA
ENSMUSG00000103364	96.5787	1.30029	0.396548	3.27901	0.0010417	0.127348
ENSMUSG00000096992	2.50515	-0.348635	1.9681	-0.177143	0.859396	NA
ENSMUSG00000103001	0.217891	1.08747	4.99644	0.217648	0.827703	NA
ENSMUSG00000101462	1.51251	-0.326172	2.69307	-0.121115	0.9036	NA
ENSMUSG00000102336	2.11264	-1.92058	2.27929	-0.842622	0.39944	NA
ENSMUSG00000042111	266.289	0.183817	0.261429	0.703124	0.481978	0.999783
ENSMUSG00000026127	493.901	-0.196393	0.229329	-0.856379	0.391788	0.999783
ENSMUSG00000026126	169.752	0.241378	0.326573	0.739125	0.459831	0.999783
ENSMUSG00000100280	18.1607	0.561239	0.779075	0.720391	0.471284	0.999783
ENSMUSG00000101223	2.0104	-0.349204	2.17433	-0.160603	0.872406	NA
ENSMUSG00000026125	1.38829	1.95922	2.89313	0.677197	0.498281	NA
ENSMUSG00000045174	0.442063	2.09356	4.84279	0.432305	0.66552	NA
ENSMUSG00000037509	31.6532	-0.470559	0.621276	-0.757406	0.448806	0.999783
ENSMUSG00000104002	10.2722	-0.936432	1.02203	-0.916244	0.359539	0.999783
ENSMUSG00000037503	2313.64	-0.233539	0.207383	-1.12612	0.260113	0.999783
ENSMUSG00000104358	2.75358	-3.51132	2.32541	-1.50998	0.131049	NA
ENSMUSG00000026123	787.48	-0.028381	0.2151	-0.131943	0.895029	0.999783
ENSMUSG00000103548	0.728338	0.637273	3.7176	0.17142	0.863893	NA
ENSMUSG00000103096	0.224172	1.10814	4.99497	0.22185	0.82443	NA
ENSMUSG00000102279	5.76604	-1.43847	1.37961	-1.04267	0.297102	NA
ENSMUSG00000103708	0.286275	-1.80911	4.99453	-0.362219	0.717189	NA
ENSMUSG00000102434	0.504166	-0.371627	4.70508	-0.0789843	0.937045	NA
ENSMUSG00000045216	714.663	-0.726821	0.220469	-3.29671	0.000978255	0.124875
ENSMUSG00000102202	12.3897	-7.13599e-05	0.920925	-7.74872e-05	0.999938	0.999979
ENSMUSG00000037470	2384.94	-0.208274	0.191877	-1.08546	0.277719	0.999783
ENSMUSG00000047180	451.57	0.340712	0.255735	1.33228	0.182767	0.999783
ENSMUSG00000037447	769.305	-0.435047	0.214575	-2.02749	0.0426128	0.765177
ENSMUSG00000010453	1462.61	-0.423463	0.205597	-2.05967	0.0394301	0.752009
ENSMUSG00000037432	108.135	-0.319604	0.364233	-0.877472	0.38023	0.999783
ENSMUSG00000001143	427.371	-0.278451	0.231275	-1.20398	0.228598	0.999783
ENSMUSG00000037408	366.138	-0.733249	0.257965	-2.84244	0.00447698	0.296595
ENSMUSG00000104316	3.25546	-0.126005	1.76865	-0.0712432	0.943204	NA
ENSMUSG00000001138	379.949	-0.129175	0.237842	-0.543113	0.587052	0.999783
ENSMUSG00000067653	17.6211	0.211545	0.814422	0.259748	0.795058	0.999783
ENSMUSG00000079610	91.7366	-0.203314	0.387395	-0.524823	0.599706	0.999783
ENSMUSG00000026121	2196.33	-0.444018	0.203819	-2.1785	0.029369	0.700094
ENSMUSG00000087589	72.0101	-0.388589	0.416647	-0.932657	0.350997	0.999783
ENSMUSG00000046337	15.5082	-0.159168	0.854563	-0.186257	0.852243	0.999783
ENSMUSG00000089906	0.224172	1.10814	4.99497	0.22185	0.82443	NA
ENSMUSG00000061518	1172.7	0.0360525	0.200702	0.179631	0.857442	0.999783
ENSMUSG00000037351	1373.45	-0.329257	0.207807	-1.58444	0.113094	0.944518
ENSMUSG00000102416	0.224172	1.10814	4.99497	0.22185	0.82443	NA
ENSMUSG00000026117	28.1511	0.167321	0.679218	0.246343	0.805416	0.999783
ENSMUSG00000026116	529.029	-0.103027	0.241198	-0.427148	0.669271	0.999783
ENSMUSG00000102930	0.217891	1.08747	4.99644	0.217648	0.827703	NA
ENSMUSG00000103159	0.442063	2.09356	4.84279	0.432305	0.66552	NA
ENSMUSG00000080054	0.224172	1.10814	4.99497	0.22185	0.82443	NA
ENSMUSG00000095944	0.286275	-1.80911	4.99453	-0.362219	0.717189	NA
ENSMUSG00000050122	0.217891	1.08747	4.99644	0.217648	0.827703	NA
ENSMUSG00000026114	0.224172	1.10814	4.99497	0.22185	0.82443	NA
ENSMUSG00000026113	190.795	-0.206746	0.302801	-0.682777	0.494748	0.999783
ENSMUSG00000026112	655.941	0.175827	0.234581	0.749537	0.453534	0.999783
ENSMUSG00000026111	452.59	0.128554	0.230005	0.558918	0.576217	0.999783
ENSMUSG00000026110	393.5	0.166858	0.250509	0.666076	0.505363	0.999783
ENSMUSG00000103948	1.5652	-1.32412	2.6757	-0.49487	0.620692	NA
ENSMUSG00000026090	14.9871	1.09914	0.906976	1.21188	0.22556	0.999783
ENSMUSG00000060771	19.0662	0.608843	0.809545	0.752081	0.452002	0.999783
ENSMUSG00000037216	58.3238	0.0941167	0.466812	0.201616	0.840217	0.999783
ENSMUSG00000026088	285.55	0.360582	0.271488	1.32817	0.184123	0.999783
ENSMUSG00000026087	707.216	0.0950578	0.225682	0.421202	0.673607	0.999783
ENSMUSG00000058407	795.653	0.396961	0.238445	1.66479	0.0959543	0.925758
ENSMUSG00000026083	1525.71	0.139114	0.198672	0.700221	0.483789	0.999783
ENSMUSG00000026082	108.388	-0.140897	0.379785	-0.370991	0.710645	0.999783
ENSMUSG00000103804	0.276861	-1.78479	4.99626	-0.357225	0.720923	NA
ENSMUSG00000037138	5.25646	-0.189829	1.5158	-0.125234	0.900339	NA
ENSMUSG00000087131	0.224172	1.10814	4.99497	0.22185	0.82443	NA
ENSMUSG00000026080	18.9735	-0.825155	0.761726	-1.08327	0.278689	0.999783
ENSMUSG00000026078	689.888	-0.0841633	0.212598	-0.39588	0.692194	0.999783
ENSMUSG00000103046	17.6023	0.208967	0.845856	0.247047	0.804872	0.999783
ENSMUSG00000026077	3.8399	-0.932732	1.63964	-0.568864	0.569448	NA
ENSMUSG00000092563	0.217891	1.08747	4.99644	0.217648	0.827703	NA
ENSMUSG00000073702	6231.89	0.162419	0.210861	0.770265	0.441143	0.999783
ENSMUSG00000003134	137.453	-0.210164	0.329502	-0.637825	0.523588	0.999783
ENSMUSG00000102607	0.217891	1.08747	4.99644	0.217648	0.827703	NA
ENSMUSG00000003135	370.651	0.0922536	0.244323	0.377588	0.705736	0.999783
ENSMUSG00000085894	49.0993	0.863767	0.52076	1.65866	0.0971833	0.928004
ENSMUSG00000077704	7.01755	-0.356279	1.23063	-0.289509	0.772192	0.999783
ENSMUSG00000048234	408.819	-0.0881115	0.27065	-0.325555	0.744761	0.999783
ENSMUSG00000102471	0.286275	-1.80911	4.99453	-0.362219	0.717189	NA
ENSMUSG00000050967	11.5183	0.211955	0.957234	0.221425	0.824762	0.999783
ENSMUSG00000097083	1.38201	1.95173	2.93253	0.665544	0.505703	NA
ENSMUSG00000057173	10.0338	-0.209533	1.04454	-0.200599	0.841012	0.999783
ENSMUSG00000026074	4016.85	-0.173642	0.195105	-0.889991	0.373471	0.999783
ENSMUSG00000026073	130.357	0.299842	0.392325	0.764269	0.444707	0.999783
ENSMUSG00000097899	1.0052	-0.349203	3.00405	-0.116244	0.907459	NA
ENSMUSG00000102975	0.884125	3.09358	3.61237	0.856386	0.391785	NA
ENSMUSG00000026072	711.203	0.303987	0.2177	1.39636	0.162607	0.99062
ENSMUSG00000103560	0.666235	2.68473	4.07255	0.659227	0.50975	NA
ENSMUSG00000070942	78.022	-0.0725619	0.402333	-0.180353	0.856876	0.999783
ENSMUSG00000103230	0.224172	1.10814	4.99497	0.22185	0.82443	NA
ENSMUSG00000026069	12.3002	0.656031	0.938323	0.699152	0.484457	0.999783
ENSMUSG00000026070	10.0694	0.979343	1.09543	0.894025	0.371308	0.999783
ENSMUSG00000026068	137.679	0.0211644	0.325897	0.0649421	0.94822	0.999783
ENSMUSG00000026065	5.49334	0.834436	1.39436	0.598437	0.549549	NA
ENSMUSG00000026062	17.2877	-0.834798	0.869395	-0.960206	0.336952	0.999783
ENSMUSG00000103270	0.217891	1.08747	4.99644	0.217648	0.827703	NA
ENSMUSG00000041945	7.02049	-1.13509	1.31345	-0.864205	0.387475	0.999783
ENSMUSG00000079588	4.51327	1.1355	1.53046	0.741937	0.458126	NA
ENSMUSG00000060679	607.84	0.0627269	0.230768	0.271818	0.785762	0.999783
ENSMUSG00000041907	1.27265	-0.914048	2.92626	-0.312361	0.754766	NA
ENSMUSG00000070939	271.481	-0.189823	0.283594	-0.669349	0.503273	0.999783
ENSMUSG00000041878	1.43785	0.668694	2.73066	0.244884	0.806547	NA
ENSMUSG00000010290	205.012	0.376908	0.300414	1.25463	0.209614	0.999783
ENSMUSG00000008136	938.059	-0.218148	0.21528	-1.01332	0.310906	0.999783
ENSMUSG00000094497	184.723	-0.0860394	0.324304	-0.265305	0.790775	0.999783
ENSMUSG00000099576	1.67772	0.983153	2.45629	0.400259	0.688966	NA
ENSMUSG00000066877	1015.48	-0.276086	0.198821	-1.38862	0.164949	0.992444
ENSMUSG00000103422	0.946229	1.21779	3.34917	0.363608	0.716151	NA
ENSMUSG00000103945	6.19011	-0.00535776	1.28247	-0.0041777	0.996667	NA
ENSMUSG00000026051	14.9894	0.635322	0.952625	0.666918	0.504825	0.999783
ENSMUSG00000100764	1.39144	1.98914	2.92796	0.679362	0.496908	NA
ENSMUSG00000100635	0.224172	1.10814	4.99497	0.22185	0.82443	NA
ENSMUSG00000100480	0.217891	1.08747	4.99644	0.217648	0.827703	NA
ENSMUSG00000057363	537.243	0.294175	0.224041	1.31304	0.189171	0.999783
ENSMUSG00000090243	14.0503	-0.0915405	0.981891	-0.0932288	0.925722	0.999783
ENSMUSG00000100701	7.4155	-0.845892	1.19229	-0.709472	0.478032	0.999783
ENSMUSG00000041763	463.973	0.284826	0.263718	1.08004	0.280125	0.999783
ENSMUSG00000047343	0.936814	1.23603	3.36091	0.367767	0.713047	NA
ENSMUSG00000026049	47.9729	0.846621	0.532737	1.58919	0.112017	0.94436
ENSMUSG00000026047	223.414	0.0441151	0.315979	0.139614	0.888965	0.999783
ENSMUSG00000041684	128.222	0.251232	0.334919	0.750126	0.453179	0.999783
ENSMUSG00000026048	183.222	-0.274808	0.295607	-0.929638	0.352559	0.999783
ENSMUSG00000101567	1.83664	2.45233	2.62587	0.933913	0.350349	NA
ENSMUSG00000056870	2.33454	1.67562	2.27933	0.735136	0.462257	NA
ENSMUSG00000026043	2816.1	-0.852596	0.218726	-3.89801	9.69851e-05	0.024116
ENSMUSG00000026042	741.38	-0.988754	0.273389	-3.61666	0.000298431	0.0556576
ENSMUSG00000104476	0.787308	-1.33807	3.61897	-0.369736	0.711579	NA
ENSMUSG00000100843	0.563136	-2.79197	4.39419	-0.635378	0.525182	NA
ENSMUSG00000025995	404.814	0.417285	0.247705	1.68461	0.0920642	0.917833
ENSMUSG00000084817	206.261	-0.129517	0.295462	-0.438354	0.661129	0.999783
ENSMUSG00000025993	71.6708	0.244873	0.443516	0.552116	0.580869	0.999783
ENSMUSG00000101262	0.877844	3.08421	3.64758	0.845551	0.397803	NA
ENSMUSG00000101337	1.87676	1.22405	2.36493	0.517585	0.604748	NA
ENSMUSG00000025986	135.524	0.541061	0.370746	1.45938	0.144459	0.971815
ENSMUSG00000100213	21.2702	1.77358	0.822514	2.15629	0.0310612	0.715217
ENSMUSG00000081185	1.00833	-0.386041	3.45828	-0.111628	0.911118	NA
ENSMUSG00000100033	1.56834	-1.34924	2.49451	-0.540884	0.588588	NA
ENSMUSG00000096973	0.224172	1.10814	4.99497	0.22185	0.82443	NA
ENSMUSG00000097883	0.276861	-1.78479	4.99626	-0.357225	0.720923	NA
ENSMUSG00000100816	0.781027	-1.35463	3.6292	-0.373258	0.708956	NA
ENSMUSG00000026109	0.276861	-1.78479	4.99626	-0.357225	0.720923	NA
ENSMUSG00000045954	343.505	0.529588	0.26222	2.01963	0.0434215	0.771994
ENSMUSG00000026107	507.605	0.429528	0.263417	1.6306	0.102974	0.94072
ENSMUSG00000099413	3.12183	0.810264	1.8204	0.445102	0.656246	NA
ENSMUSG00000101741	0.501033	-0.328159	4.71632	-0.0695794	0.944528	NA
ENSMUSG00000018417	550.315	-0.0932839	0.282307	-0.330435	0.741071	0.999783
ENSMUSG00000100313	0.224172	1.10814	4.99497	0.22185	0.82443	NA
ENSMUSG00000099135	0.276861	-1.78479	4.99626	-0.357225	0.720923	NA
ENSMUSG00000062939	6.75727	0.739102	1.27979	0.577519	0.563589	0.999783
ENSMUSG00000101628	0.890407	3.10289	3.62893	0.855042	0.392528	NA
ENSMUSG00000078291	0.95251	1.22955	3.34196	0.367914	0.712937	NA
ENSMUSG00000109599	1.16099	1.65664	3.0852	0.536962	0.591294	NA
ENSMUSG00000026104	795.259	0.711161	0.645628	1.1015	0.270678	0.999783
ENSMUSG00000099569	1.06417	-1.91762	3.21978	-0.595577	0.551458	NA
ENSMUSG00000026103	813.098	0.712182	0.267004	2.66731	0.00764606	0.389985
ENSMUSG00000002881	445.204	0.212565	0.268293	0.792285	0.428194	0.999783
ENSMUSG00000097833	0.728338	0.637273	3.7176	0.17142	0.863893	NA
ENSMUSG00000101501	0.989503	-0.346185	3.48325	-0.0993857	0.920832	NA
ENSMUSG00000100120	0.734619	0.653754	4.00329	0.163304	0.870279	NA
ENSMUSG00000100007	0.224172	1.10814	4.99497	0.22185	0.82443	NA
ENSMUSG00000043015	101.399	0.0962177	0.362769	0.265231	0.790831	0.999783
ENSMUSG00000041439	151.524	-0.328769	0.348228	-0.944121	0.345108	0.999783
ENSMUSG00000026102	163.721	0.107716	0.305607	0.352465	0.724489	0.999783
ENSMUSG00000041426	127.65	0.264639	0.333998	0.792337	0.428164	0.999783
ENSMUSG00000026098	40.7807	0.587421	0.542583	1.08264	0.278969	0.999783
ENSMUSG00000026097	80.6964	1.37035	0.466546	2.93723	0.00331163	0.248036
ENSMUSG00000026096	53.3301	0.612587	0.476841	1.28468	0.198905	0.999783
ENSMUSG00000099913	1.10202	3.41178	3.31096	1.03045	0.302799	NA
ENSMUSG00000026095	122.323	0.19804	0.359858	0.550327	0.582095	0.999783
ENSMUSG00000096141	0.796723	-1.3576	3.88468	-0.349476	0.726732	NA
ENSMUSG00000026094	332.175	0.497027	0.26943	1.84474	0.0650757	0.857978
ENSMUSG00000042807	9.37824	1.43633	1.0898	1.31797	0.187515	0.999783
ENSMUSG00000098443	0.217891	1.08747	4.99644	0.217648	0.827703	NA
ENSMUSG00000025983	3.35456	-1.03032	1.73089	-0.595254	0.551674	NA
ENSMUSG00000041303	233.857	0.448896	0.290985	1.54268	0.122909	0.960894
ENSMUSG00000109809	0.217891	1.08747	4.99644	0.217648	0.827703	NA
ENSMUSG00000073678	38.6652	-0.0426919	0.581008	-0.073479	0.941425	0.999783
ENSMUSG00000052331	113.237	0.0846432	0.400785	0.211193	0.832736	0.999783
ENSMUSG00000102642	0.286275	-1.80911	4.99453	-0.362219	0.717189	NA
ENSMUSG00000025982	3220.35	0.153249	0.188699	0.812135	0.416714	0.999783
ENSMUSG00000103030	0.830582	-3.35486	4.09255	-0.819748	0.41236	NA
ENSMUSG00000025981	84.7193	0.700033	0.412759	1.69598	0.0898888	0.916051
ENSMUSG00000101122	3.87775	0.386983	1.63238	0.237067	0.812605	NA
ENSMUSG00000025980	2848.91	0.270948	0.183982	1.47269	0.140835	0.971815
ENSMUSG00000073676	748.21	0.487363	0.240483	2.0266	0.0427032	0.765177
ENSMUSG00000100736	0.224172	1.10814	4.99497	0.22185	0.82443	NA
ENSMUSG00000089670	15.6075	-0.0207523	0.8371	-0.0247907	0.980222	0.999783
ENSMUSG00000025979	499.353	0.62286	0.263482	2.36396	0.0180809	0.587177
ENSMUSG00000061863	0.217891	1.08747	4.99644	0.217648	0.827703	NA
ENSMUSG00000025978	41.1509	0.405474	0.537023	0.755039	0.450226	0.999783
ENSMUSG00000097649	4.27968	1.03404	1.56002	0.662837	0.507435	NA
ENSMUSG00000046994	46.2755	0.334952	0.528364	0.633941	0.526119	0.999783
ENSMUSG00000100215	7.28272	0.438249	1.19314	0.367307	0.71339	0.999783
ENSMUSG00000038349	43.4992	0.0455351	0.515756	0.088288	0.929648	0.999783
ENSMUSG00000102145	0.718924	0.65728	3.73481	0.175987	0.860304	NA
ENSMUSG00000038331	59.1831	-0.0409698	0.470999	-0.0869848	0.930684	0.999783
ENSMUSG00000087022	7.61522	-0.541993	1.16694	-0.464455	0.642322	0.999783
ENSMUSG00000104310	0.286275	-1.80911	4.99453	-0.362219	0.717189	NA
ENSMUSG00000097519	3.52919	-0.33469	1.74161	-0.192172	0.847607	NA
ENSMUSG00000038323	17.1171	1.60777	0.862586	1.86389	0.0623365	0.853831
ENSMUSG00000048495	81.4279	0.456966	0.399158	1.14482	0.252282	0.999783
ENSMUSG00000025971	135.13	0.645815	0.351651	1.83652	0.0662802	0.863612
ENSMUSG00000038305	17.0485	0.0397252	0.824476	0.0481823	0.961571	0.999783
ENSMUSG00000054770	172.8	0.0265137	0.303459	0.0873716	0.930376	0.999783
ENSMUSG00000026039	77.6623	0.620768	0.416683	1.48979	0.136281	0.966873
ENSMUSG00000063558	619.827	-0.468368	0.253333	-1.84882	0.0644837	0.854395
ENSMUSG00000064294	1.12086	3.43443	3.63691	0.944326	0.345003	NA
ENSMUSG00000089822	0.217891	1.08747	4.99644	0.217648	0.827703	NA
ENSMUSG00000079554	0.448344	2.1121	4.89091	0.431841	0.665857	NA
ENSMUSG00000103839	19.6363	0.573059	0.755091	0.758927	0.447896	0.999783
ENSMUSG00000051223	1741.51	0.375337	0.213698	1.75639	0.0790215	0.896628
ENSMUSG00000026034	1568.4	0.665696	0.209314	3.18037	0.00147086	0.152254
ENSMUSG00000026035	268.109	0.376244	0.277057	1.358	0.174463	0.996421
ENSMUSG00000026036	368.262	0.118876	0.241369	0.492508	0.62236	0.999783
ENSMUSG00000026037	183.282	0.479768	0.293814	1.63289	0.102491	0.939566
ENSMUSG00000094245	1.22309	0.230246	2.75687	0.0835173	0.93344	NA
ENSMUSG00000085054	8.52446	-0.182773	1.13002	-0.161743	0.871508	0.999783
ENSMUSG00000038174	48.4667	0.686049	0.502715	1.36469	0.172351	0.996421
ENSMUSG00000026032	434.191	0.12724	0.265386	0.479452	0.631617	0.999783
ENSMUSG00000059647	1.49995	-0.34826	2.51203	-0.138637	0.889737	NA
ENSMUSG00000047528	0.771612	-1.33411	3.93112	-0.339373	0.734329	NA
ENSMUSG00000102059	48.9015	0.176931	0.562239	0.31469	0.752997	0.999783
ENSMUSG00000026031	733.912	0.0674049	0.216526	0.311302	0.755571	0.999783
ENSMUSG00000026029	856.719	-0.130663	0.214257	-0.609845	0.541964	0.999783
ENSMUSG00000102719	5.44049	0.191121	1.44273	0.132471	0.894612	NA
ENSMUSG00000099719	1.89561	1.24163	2.31686	0.53591	0.592021	NA
ENSMUSG00000026028	335.754	-0.0558743	0.260956	-0.214114	0.830458	0.999783
ENSMUSG00000026027	99.059	-0.338043	0.379127	-0.891636	0.372588	0.999783
ENSMUSG00000038079	213.159	0.165385	0.279086	0.592594	0.553453	0.999783
ENSMUSG00000097573	4.29538	1.03006	1.56498	0.658191	0.510415	NA
ENSMUSG00000079550	3.02814	-0.367513	1.8628	-0.197291	0.8436	NA
ENSMUSG00000101586	5.53959	-0.339998	1.3787	-0.246608	0.805212	NA
ENSMUSG00000026024	197.279	-0.202091	0.315994	-0.63954	0.522472	0.999783
ENSMUSG00000041075	458.471	0.208189	0.244473	0.851585	0.394444	0.999783
ENSMUSG00000097819	11.0676	0.698753	0.98021	0.71286	0.475932	0.999783
ENSMUSG00000047361	0.949377	1.26018	3.62205	0.34792	0.7279	NA
ENSMUSG00000026021	550.452	0.666755	0.254574	2.6191	0.00881624	0.415566
ENSMUSG00000089276	0.276861	-1.78479	4.99626	-0.357225	0.720923	NA
ENSMUSG00000103821	1.52193	-0.339185	2.68743	-0.126212	0.899564	NA
ENSMUSG00000101400	1.04847	-1.91838	3.49453	-0.548967	0.583028	NA
ENSMUSG00000026020	1468.21	0.46219	0.199314	2.3189	0.0204003	0.605749
ENSMUSG00000077345	0.217891	1.08747	4.99644	0.217648	0.827703	NA
ENSMUSG00000089512	0.224172	1.10814	4.99497	0.22185	0.82443	NA
ENSMUSG00000089093	0.494752	-0.348141	4.73921	-0.0734598	0.94144	NA
ENSMUSG00000067336	491.253	0.599152	0.280805	2.13369	0.032868	0.718996
ENSMUSG00000041040	266.493	0.206418	0.275332	0.749704	0.453433	0.999783
ENSMUSG00000103696	0.725205	0.675122	4.02283	0.167823	0.866723	NA
ENSMUSG00000100901	0.286275	-1.80911	4.99453	-0.362219	0.717189	NA
ENSMUSG00000026018	1.28206	-0.927725	2.71457	-0.341757	0.732534	NA
ENSMUSG00000026019	440.804	0.169813	0.229681	0.739344	0.459698	0.999783
ENSMUSG00000026017	61.5581	0.417828	0.483311	0.86451	0.387308	0.999783
ENSMUSG00000082609	0.435781	2.07482	4.89366	0.423982	0.671579	NA
ENSMUSG00000073664	158.183	0.748733	0.327248	2.28797	0.0221394	0.630994
ENSMUSG00000049439	357.971	-0.0297479	0.243924	-0.121956	0.902934	0.999783
ENSMUSG00000103822	3.50494	1.66184	1.7848	0.931106	0.351799	NA
ENSMUSG00000026782	183.042	0.304704	0.339161	0.898407	0.368969	0.999783
ENSMUSG00000026014	248.499	0.399593	0.309489	1.29114	0.196655	0.999783
ENSMUSG00000081562	0.563136	-2.79197	4.39419	-0.635378	0.525182	NA
ENSMUSG00000101188	1325.84	-0.150699	0.204849	-0.735658	0.461939	0.999783
ENSMUSG00000026012	4.10279	2.668	1.84782	1.44386	0.148778	NA
ENSMUSG00000085965	0.224172	1.10814	4.99497	0.22185	0.82443	NA
ENSMUSG00000026011	12.3857	-0.519435	0.932965	-0.556758	0.577693	0.999783
ENSMUSG00000081382	50.6055	0.12441	0.509516	0.244172	0.807098	0.999783
ENSMUSG00000026009	11.7716	0.831005	0.968695	0.85786	0.39097	0.999783
ENSMUSG00000052062	5.26205	-0.480707	1.45842	-0.329608	0.741696	NA
ENSMUSG00000085400	0.286275	-1.80911	4.99453	-0.362219	0.717189	NA
ENSMUSG00000100750	1.07358	-1.93125	3.21077	-0.601492	0.547512	NA
ENSMUSG00000084333	0.435781	2.07482	4.89366	0.423982	0.671579	NA
ENSMUSG00000025969	1570.47	0.230883	0.245667	0.939822	0.347309	0.999783
ENSMUSG00000100811	2.28726	-0.66729	2.05673	-0.324443	0.745603	NA
ENSMUSG00000103032	5.31873	0.45531	1.41248	0.322348	0.747189	NA
ENSMUSG00000040865	347.044	-0.09968	0.243636	-0.409135	0.682441	0.999783
ENSMUSG00000081429	0.217891	1.08747	4.99644	0.217648	0.827703	NA
ENSMUSG00000084799	14.0822	-0.34428	0.876065	-0.392985	0.694331	0.999783
ENSMUSG00000101599	63.8194	0.304114	0.486184	0.625512	0.531635	0.999783
ENSMUSG00000025968	614.278	0.0109343	0.219701	0.0497692	0.960306	0.999783
ENSMUSG00000025967	12671.7	0.0929382	0.200641	0.463207	0.643216	0.999783
ENSMUSG00000064612	0.949377	1.26018	3.62205	0.34792	0.7279	NA
ENSMUSG00000064602	15.418	0.261948	0.846972	0.309276	0.757111	0.999783
ENSMUSG00000046856	0.958792	1.24047	3.60891	0.343724	0.731054	NA
ENSMUSG00000027520	0.276861	-1.78479	4.99626	-0.357225	0.720923	NA
ENSMUSG00000081643	61.9038	-0.505543	0.452128	-1.11814	0.263506	0.999783
ENSMUSG00000025964	4.06388	-2.35208	1.70471	-1.37975	0.167663	NA
ENSMUSG00000025962	196.508	0.67464	0.295133	2.28588	0.0222612	0.632736
ENSMUSG00000025961	0.510447	-0.351662	4.68284	-0.075096	0.940138	NA
ENSMUSG00000025959	341.278	0.0992467	0.257801	0.384974	0.700257	0.999783
ENSMUSG00000025958	342.997	0.265881	0.261878	1.01529	0.30997	0.999783
ENSMUSG00000025956	116.994	0.0780075	0.34595	0.225488	0.8216	0.999783
ENSMUSG00000101832	1.46924	0.649977	2.97083	0.218786	0.826817	NA
ENSMUSG00000087213	8.02675	0.454355	1.14044	0.398401	0.690334	0.999783
ENSMUSG00000070871	93.9941	0.0721653	0.376181	0.191837	0.84787	0.999783
ENSMUSG00000045005	211.035	0.0260134	0.285365	0.0911582	0.927367	0.999783
ENSMUSG00000051344	154.341	0.0369656	0.316114	0.116938	0.90691	0.999783
ENSMUSG00000097264	0.224172	1.10814	4.99497	0.22185	0.82443	NA
ENSMUSG00000084416	1550.58	-0.118374	0.216199	-0.547522	0.58402	0.999783
ENSMUSG00000044816	0.659953	2.67231	4.08735	0.653799	0.513241	NA
ENSMUSG00000025950	1042	0.263658	0.21948	1.20128	0.229641	0.999783
ENSMUSG00000025949	255.617	0.279155	0.287784	0.970017	0.332038	0.999783
ENSMUSG00000082774	0.224172	1.10814	4.99497	0.22185	0.82443	NA
ENSMUSG00000015222	128.36	0.887428	0.357457	2.48261	0.0130423	0.493806
ENSMUSG00000055567	0.718924	0.65728	3.73481	0.175987	0.860304	NA
ENSMUSG00000026005	214.509	0.038245	0.287929	0.132828	0.89433	0.999783
ENSMUSG00000026004	76.8903	0.232835	0.424064	0.549057	0.582966	0.999783
ENSMUSG00000102559	2.67035	0.455756	1.91535	0.23795	0.81192	NA
ENSMUSG00000102374	1.1704	1.63995	3.07657	0.533047	0.594001	NA
ENSMUSG00000102776	1.35358	-2.3643	2.96156	-0.798329	0.424679	NA
ENSMUSG00000082057	0.224172	1.10814	4.99497	0.22185	0.82443	NA
ENSMUSG00000103706	0.877844	3.08421	3.64758	0.845551	0.397803	NA
ENSMUSG00000103756	3.06514	-0.853873	1.97888	-0.431493	0.66611	NA
ENSMUSG00000103382	0.494752	-0.348141	4.73921	-0.0734598	0.94144	NA
ENSMUSG00000103553	2.07878	-1.08517	2.1824	-0.497238	0.619021	NA
ENSMUSG00000026003	1561.66	0.354749	0.2178	1.62878	0.103359	0.94072
ENSMUSG00000082769	4.40076	0.307024	1.51104	0.203187	0.838989	NA
ENSMUSG00000061816	47.5432	2.9758	0.582687	5.10704	3.27247e-07	0.000232283
ENSMUSG00000094191	1.94829	0.397079	2.22989	0.178071	0.858668	NA
ENSMUSG00000026000	549.264	0.0711286	0.226305	0.314304	0.75329	0.999783
ENSMUSG00000084332	0.790442	-1.37531	3.89619	-0.352987	0.724098	NA
ENSMUSG00000101387	0.276861	-1.78479	4.99626	-0.357225	0.720923	NA
ENSMUSG00000099804	0.728338	0.637273	3.7176	0.17142	0.863893	NA
ENSMUSG00000101156	0.276861	-1.78479	4.99626	-0.357225	0.720923	NA
ENSMUSG00000025997	67.2431	0.522622	0.440856	1.18547	0.235831	0.999783
ENSMUSG00000100815	0.217891	1.08747	4.99644	0.217648	0.827703	NA
ENSMUSG00000099954	0.722057	0.618317	4.02924	0.153458	0.878037	NA
ENSMUSG00000080524	0.217891	1.08747	4.99644	0.217648	0.827703	NA
ENSMUSG00000026196	151.542	0.0894972	0.356969	0.250714	0.802035	0.999783
ENSMUSG00000089965	0.501033	-0.328159	4.71632	-0.0695794	0.944528	NA
ENSMUSG00000026192	1968.69	-0.0687747	0.194753	-0.353138	0.723985	0.999783
ENSMUSG00000026193	64594.7	-0.154348	0.257395	-0.599653	0.548738	0.999783
ENSMUSG00000073652	1.84607	2.4823	2.88596	0.860128	0.389718	NA
ENSMUSG00000101834	1.22309	0.230246	2.75687	0.0835173	0.93344	NA
ENSMUSG00000100319	0.712642	0.639729	4.04929	0.157985	0.874468	NA
ENSMUSG00000102689	0.217891	1.08747	4.99644	0.217648	0.827703	NA
ENSMUSG00000099707	9.73519	0.395986	1.0534	0.375912	0.706982	0.999783
ENSMUSG00000101211	14.5018	1.15245	0.917898	1.25554	0.209285	0.999783
ENSMUSG00000101848	3.11243	0.848974	1.99411	0.425741	0.670297	NA
ENSMUSG00000059483	0.448344	2.1121	4.89091	0.431841	0.665857	NA
ENSMUSG00000102123	4.1122	2.65546	1.77839	1.49318	0.135389	NA
ENSMUSG00000039395	15.3139	-0.737472	0.83605	-0.882091	0.377728	0.999783
ENSMUSG00000094655	2.31569	1.66197	2.26182	0.734792	0.462466	NA
ENSMUSG00000093956	1.06417	-1.91762	3.21978	-0.595577	0.551458	NA
ENSMUSG00000093843	0.946229	1.21779	3.34917	0.363608	0.716151	NA
ENSMUSG00000026189	178.302	0.0824646	0.320528	0.257278	0.796964	0.999783
ENSMUSG00000026188	0.877844	3.08421	3.64758	0.845551	0.397803	NA
ENSMUSG00000026187	460.687	-0.160493	0.230806	-0.695358	0.486831	0.999783
ENSMUSG00000039372	3.39241	0.489556	1.72728	0.283426	0.776851	NA
ENSMUSG00000039354	272.985	-0.213268	0.270044	-0.789752	0.429673	0.999783
ENSMUSG00000046330	6672.92	0.0321097	0.22215	0.14454	0.885074	0.999783
ENSMUSG00000039323	8.66004	1.77906	1.38067	1.28855	0.197556	0.999783
ENSMUSG00000026185	86.9519	0.441359	0.479742	0.919993	0.357576	0.999783
ENSMUSG00000055322	315.3	-0.0316649	0.256202	-0.123593	0.901637	0.999783
ENSMUSG00000061815	5.84172	0.373568	1.36501	0.273674	0.784335	NA
ENSMUSG00000026180	51.1451	0.60995	0.487231	1.25187	0.210617	0.999783
ENSMUSG00000048480	3.90931	1.86786	1.74525	1.07025	0.284506	NA
ENSMUSG00000006304	3083.13	0.187787	0.205927	0.911911	0.361816	0.999783
ENSMUSG00000006299	2142.1	-0.174511	0.192876	-0.90478	0.365582	0.999783
ENSMUSG00000026179	294.847	-0.0461077	0.255664	-0.180345	0.856882	0.999783
ENSMUSG00000103013	3.03757	-0.344721	1.86163	-0.185172	0.853094	NA
ENSMUSG00000006301	1144.44	0.0665239	0.199905	0.332777	0.739302	0.999783
ENSMUSG00000103403	0.712642	0.639729	4.04929	0.157985	0.874468	NA
ENSMUSG00000073650	3.14313	0.327073	1.88453	0.173557	0.862214	NA
ENSMUSG00000026177	240.187	0.505552	0.273284	1.84992	0.0643254	0.854395
ENSMUSG00000026176	1337.37	-0.25199	0.194148	-1.29793	0.194312	0.999783
ENSMUSG00000065468	1.35358	-2.3643	2.96156	-0.798329	0.424679	NA
ENSMUSG00000026175	8.83536	0.135932	1.09388	0.124265	0.901105	0.999783
ENSMUSG00000033364	263.722	0.253451	0.267744	0.946618	0.343833	0.999783
ENSMUSG00000103227	0.572551	-2.81366	4.77965	-0.588674	0.55608	NA
ENSMUSG00000026174	649.908	0.0571022	0.219696	0.259914	0.79493	0.999783
ENSMUSG00000026173	4.35748	0.647859	1.54182	0.420192	0.674345	NA
ENSMUSG00000026135	149.753	-0.601535	0.342332	-1.75717	0.0788896	0.896628
ENSMUSG00000026172	199.2	0.0899689	0.305351	0.294641	0.768268	0.999783
ENSMUSG00000026171	492.924	-0.0599968	0.226761	-0.264582	0.791331	0.999783
ENSMUSG00000033276	121.458	-0.371912	0.354998	-1.04765	0.294802	0.999783
ENSMUSG00000033257	1109.7	0.00116719	0.207918	0.0056137	0.995521	0.999783
ENSMUSG00000026170	114.722	0.192432	0.373048	0.515838	0.605968	0.999783
ENSMUSG00000006542	2.36838	0.88344	2.21584	0.398693	0.690119	NA
ENSMUSG00000033227	26.6711	1.31362	0.928357	1.415	0.157069	0.988036
ENSMUSG00000026167	74.3619	0.0545284	0.451824	0.120685	0.90394	0.999783
ENSMUSG00000090071	18.8886	-1.11061	0.779312	-1.42511	0.154124	0.98508
ENSMUSG00000006546	0.217891	1.08747	4.99644	0.217648	0.827703	NA
ENSMUSG00000006538	1.50937	-0.360792	2.50701	-0.143914	0.885569	NA
ENSMUSG00000103145	1.55036	3.90361	2.9061	1.34325	0.179192	NA
ENSMUSG00000026162	55.6804	0.0254562	0.46357	0.0549133	0.956208	0.999783
ENSMUSG00000026205	7.07737	0.352511	1.22141	0.28861	0.77288	0.999783
ENSMUSG00000033159	979.21	0.0543906	0.203068	0.267844	0.788819	0.999783
ENSMUSG00000049339	989.591	-0.104718	0.205378	-0.509878	0.610137	0.999783
ENSMUSG00000026197	198.726	-0.037568	0.288995	-0.129995	0.89657	0.999783
ENSMUSG00000026198	9.02814	0.205922	1.12259	0.183435	0.854457	0.999783
ENSMUSG00000033124	149.213	-0.545687	0.394943	-1.38169	0.167068	0.994439
ENSMUSG00000026199	292.537	-0.12395	0.257085	-0.482136	0.629709	0.999783
ENSMUSG00000026200	73.0936	-0.200904	0.414873	-0.484255	0.628205	0.999783
ENSMUSG00000026201	638.061	0.0558226	0.219009	0.254887	0.79881	0.999783
ENSMUSG00000026202	779.18	-0.0915234	0.208545	-0.438867	0.660758	0.999783
ENSMUSG00000096094	1.06417	-1.91762	3.21978	-0.595577	0.551458	NA
ENSMUSG00000026203	392.327	-0.0137606	0.241523	-0.0569742	0.954566	0.999783
ENSMUSG00000026204	58.3149	-1.59042	0.49581	-3.20772	0.0013379	0.148343
ENSMUSG00000033061	0.217891	1.08747	4.99644	0.217648	0.827703	NA
ENSMUSG00000026209	870.413	-0.0817783	0.207635	-0.393855	0.693688	0.999783
ENSMUSG00000026208	267.277	1.46249	0.322197	4.53912	5.64905e-06	0.0026314
ENSMUSG00000026207	102.367	0.0703885	0.401177	0.175455	0.860722	0.999783
ENSMUSG00000033021	581.356	-0.314107	0.230714	-1.36146	0.173369	0.996421
ENSMUSG00000032997	1072.78	-0.00727197	0.245282	-0.0296474	0.976348	0.999783
ENSMUSG00000026211	28.4174	0.201676	0.640509	0.314868	0.752862	0.999783
ENSMUSG00000051703	20.7849	-0.821129	0.73531	-1.11671	0.264118	0.999783
ENSMUSG00000032968	2.30609	-0.682763	2.0892	-0.326806	0.743815	NA
ENSMUSG00000026213	471.062	-0.289693	0.239327	-1.21045	0.226106	0.999783
ENSMUSG00000006576	243.67	-0.313806	0.304156	-1.03173	0.302201	0.999783
ENSMUSG00000026235	4.76398	-1.72346	1.50501	-1.14515	0.252146	NA
ENSMUSG00000102052	0.286275	-1.80911	4.99453	-0.362219	0.717189	NA
ENSMUSG00000004872	1.61246	2.22668	2.74181	0.812119	0.416723	NA
ENSMUSG00000032908	2.3408	1.63537	2.24659	0.727933	0.466655	NA
ENSMUSG00000026245	590.62	0.245501	0.221922	1.10625	0.268619	0.999783
ENSMUSG00000101798	0.712642	0.639729	4.04929	0.157985	0.874468	NA
ENSMUSG00000104018	1.56205	-1.36411	2.65205	-0.514361	0.606999	NA
ENSMUSG00000012187	0.224172	1.10814	4.99497	0.22185	0.82443	NA
ENSMUSG00000099364	0.217891	1.08747	4.99644	0.217648	0.827703	NA
ENSMUSG00000032883	326.536	0.396557	0.269853	1.46953	0.14169	0.971815
ENSMUSG00000079470	37.2908	0.917705	0.594531	1.54358	0.122691	0.960894
ENSMUSG00000099377	3.78406	-0.553497	1.68427	-0.328627	0.742437	NA
ENSMUSG00000047330	23.3932	1.1332	0.724133	1.56491	0.117604	0.952208
ENSMUSG00000072978	3.63456	-1.20848	1.71149	-0.706098	0.480127	NA
ENSMUSG00000054702	55.3147	0.504614	0.533604	0.945672	0.344316	0.999783
ENSMUSG00000073643	333.665	0.134289	0.253412	0.529922	0.596166	0.999783
ENSMUSG00000026248	280.95	0.183845	0.285433	0.644091	0.519516	0.999783
ENSMUSG00000026249	6057.27	0.671711	0.24862	2.70176	0.00689742	0.379384
ENSMUSG00000067106	2.35564	-1.34445	2.07127	-0.649096	0.516276	NA
ENSMUSG00000100397	1.86089	-1.6611	2.47536	-0.671053	0.502186	NA
ENSMUSG00000099552	0.286275	-1.80911	4.99453	-0.362219	0.717189	NA
ENSMUSG00000043230	4.32294	0.64213	1.56283	0.410877	0.681163	NA
ENSMUSG00000004364	692.564	0.251519	0.248287	1.01302	0.311052	0.999783
ENSMUSG00000103076	1.50937	-0.360792	2.50701	-0.143914	0.885569	NA
ENSMUSG00000101483	0.217891	1.08747	4.99644	0.217648	0.827703	NA
ENSMUSG00000038608	179.472	0.407973	0.295548	1.38039	0.167466	0.994735
ENSMUSG00000104488	0.217891	1.08747	4.99644	0.217648	0.827703	NA
ENSMUSG00000102721	0.224172	1.10814	4.99497	0.22185	0.82443	NA
ENSMUSG00000087008	8.28163	0.340022	1.1257	0.302055	0.76261	0.999783
ENSMUSG00000100561	0.217891	1.08747	4.99644	0.217648	0.827703	NA
ENSMUSG00000103571	0.286275	-1.80911	4.99453	-0.362219	0.717189	NA
ENSMUSG00000055980	83.1518	-0.668088	0.455575	-1.46647	0.14252	0.971815
ENSMUSG00000026142	188.895	0.0618478	0.302312	0.204583	0.837898	0.999783
ENSMUSG00000104493	0.877844	3.08421	3.64758	0.845551	0.397803	NA
ENSMUSG00000067158	2.11663	1.43964	2.33664	0.616116	0.537818	NA
ENSMUSG00000079465	0.777894	-1.31633	3.91919	-0.335868	0.73697	NA
ENSMUSG00000097564	1.26636	-0.929851	3.14716	-0.295457	0.767645	NA
ENSMUSG00000026150	669.461	0.0915365	0.213841	0.428058	0.668609	0.999783
ENSMUSG00000101450	1.71471	0.0849199	2.52495	0.0336323	0.97317	NA
ENSMUSG00000100744	0.896688	3.11246	3.96648	0.784692	0.432634	NA
ENSMUSG00000026159	749.322	0.204315	0.226904	0.900445	0.367884	0.999783
ENSMUSG00000113880	9.64463	0.0148195	1.05287	0.0140754	0.98877	0.999783
ENSMUSG00000113973	0.501033	-0.328159	4.71632	-0.0695794	0.944528	NA
ENSMUSG00000026166	0.224172	1.10814	4.99497	0.22185	0.82443	NA
ENSMUSG00000079140	0.930533	1.22401	3.64747	0.335578	0.737189	NA
ENSMUSG00000045658	134.246	0.606769	0.379313	1.59965	0.109675	0.94305
ENSMUSG00000102750	0.224172	1.10814	4.99497	0.22185	0.82443	NA
ENSMUSG00000101934	0.224172	1.10814	4.99497	0.22185	0.82443	NA
ENSMUSG00000036766	1.62503	2.23846	2.78768	0.802983	0.421984	NA
ENSMUSG00000026219	1590.42	0.171947	0.207629	0.828145	0.407589	0.999783
ENSMUSG00000104503	1.82094	2.46068	2.63283	0.934613	0.349988	NA
ENSMUSG00000073633	40.2901	0.0252275	0.533869	0.0472542	0.962311	0.999783
ENSMUSG00000118590	6.68241	0.191392	1.30538	0.146618	0.883434	0.999783
ENSMUSG00000099693	1.33247	3.68477	3.08495	1.19443	0.232308	NA
ENSMUSG00000052477	11.8588	0.70547	1.0209	0.691027	0.489548	0.999783
ENSMUSG00000064281	50.2086	0.104828	0.494925	0.211805	0.832259	0.999783
ENSMUSG00000118640	1.51565	-0.350141	2.50372	-0.139849	0.88878	NA
ENSMUSG00000061852	3.13439	0.817953	1.8301	0.446945	0.654915	NA
ENSMUSG00000101279	4.42901	0.311163	1.56699	0.198574	0.842596	NA
ENSMUSG00000089844	12.3705	-0.829221	1.00309	-0.82667	0.408424	0.999783
ENSMUSG00000073631	0.217891	1.08747	4.99644	0.217648	0.827703	NA
ENSMUSG00000072109	52.6329	-0.234491	0.505435	-0.463939	0.642691	0.999783
ENSMUSG00000089716	2.16932	0.63934	2.13971	0.298798	0.765094	NA
ENSMUSG00000079457	6.68013	1.22738	1.48011	0.829246	0.406965	0.999783
ENSMUSG00000090252	2.79771	-0.609106	1.87115	-0.325526	0.744783	NA
ENSMUSG00000079455	1.07672	-1.96036	3.46297	-0.566092	0.571331	NA
ENSMUSG00000091199	6.33403	0.571539	1.33539	0.427992	0.668657	0.999783
ENSMUSG00000118591	0.728338	0.637273	3.7176	0.17142	0.863893	NA
ENSMUSG00000101751	1.1451	-3.81377	3.6072	-1.05727	0.290389	NA
ENSMUSG00000118607	4.64936	0.111925	1.52095	0.0735892	0.941337	NA
ENSMUSG00000070034	508.34	-0.156644	0.246357	-0.635842	0.524879	0.999783
ENSMUSG00000090103	0.286275	-1.80911	4.99453	-0.362219	0.717189	NA
ENSMUSG00000070031	385.124	-0.0294136	0.250335	-0.117497	0.906467	0.999783
ENSMUSG00000073628	0.722057	0.618317	4.02924	0.153458	0.878037	NA
ENSMUSG00000090246	7.08698	1.10965	1.24362	0.892275	0.372246	0.999783
ENSMUSG00000026222	780.086	0.311578	0.250599	1.24333	0.213745	0.999783
ENSMUSG00000052760	232.703	0.205061	0.295898	0.693013	0.488301	0.999783
ENSMUSG00000100217	0.224172	1.10814	4.99497	0.22185	0.82443	NA
ENSMUSG00000036707	745.63	-0.0424312	0.22672	-0.187153	0.851541	0.999783
ENSMUSG00000026223	3373.09	-0.0158612	0.200076	-0.0792758	0.936813	0.999783
ENSMUSG00000026224	7.89626	0.851715	1.1555	0.737095	0.461064	0.999783
ENSMUSG00000099767	1.1547	1.64772	3.11573	0.528837	0.596918	NA
ENSMUSG00000049608	12.1655	-0.0531213	0.927833	-0.0572531	0.954344	0.999783
ENSMUSG00000100108	0.777894	-1.31633	3.91919	-0.335868	0.73697	NA
ENSMUSG00000099342	2.0978	1.47174	2.345	0.627608	0.530261	NA
ENSMUSG00000026229	1128.96	0.0555721	0.232811	0.238701	0.811338	0.999783
ENSMUSG00000026228	4.38734	-1.22465	1.60577	-0.762657	0.445668	NA
ENSMUSG00000103272	0.501033	-0.328159	4.71632	-0.0695794	0.944528	NA
ENSMUSG00000062590	155.344	-0.125964	0.3305	-0.381131	0.703106	0.999783
ENSMUSG00000079445	171.906	-0.0768984	0.315565	-0.243685	0.807475	0.999783
ENSMUSG00000026234	10906.6	0.285314	0.191474	1.4901	0.136199	0.966873
ENSMUSG00000073627	17.6996	0.219154	0.785024	0.279168	0.780116	0.999783
ENSMUSG00000026237	0.286275	-1.80911	4.99453	-0.362219	0.717189	NA
ENSMUSG00000101328	0.949377	1.26018	3.62205	0.34792	0.7279	NA
ENSMUSG00000026238	8712.52	0.198659	0.212512	0.934815	0.349884	0.999783
ENSMUSG00000026239	332.983	0.0373615	0.251139	0.148769	0.881736	0.999783
ENSMUSG00000102927	1.01461	-0.368361	3.20207	-0.115038	0.908415	NA
ENSMUSG00000026240	257.526	-0.210266	0.269967	-0.778857	0.436064	0.999783
ENSMUSG00000103609	0.501033	-0.328159	4.71632	-0.0695794	0.944528	NA
ENSMUSG00000026241	1.58403	-1.34449	2.66558	-0.504388	0.613989	NA
ENSMUSG00000053333	231.474	-0.0783468	0.276791	-0.283053	0.777136	0.999783
ENSMUSG00000100768	0.217891	1.08747	4.99644	0.217648	0.827703	NA
ENSMUSG00000104121	0.666235	2.68473	4.07255	0.659227	0.50975	NA
ENSMUSG00000102383	0.448344	2.1121	4.89091	0.431841	0.665857	NA
ENSMUSG00000102293	0.276861	-1.78479	4.99626	-0.357225	0.720923	NA
ENSMUSG00000102649	10.4061	1.42929	1.14571	1.24752	0.212208	0.999783
ENSMUSG00000084106	777.791	-0.0844315	0.213915	-0.394696	0.693067	0.999783
ENSMUSG00000102571	12.6344	1.13175	0.986989	1.14667	0.251517	0.999783
ENSMUSG00000102956	1.17668	1.64875	3.0969	0.532386	0.594458	NA
ENSMUSG00000103984	7.49519	1.49032	1.21708	1.22451	0.22076	0.999783
ENSMUSG00000101940	0.712642	0.639729	4.04929	0.157985	0.874468	NA
ENSMUSG00000026247	0.504166	-0.371627	4.70508	-0.0789843	0.937045	NA
ENSMUSG00000036480	0.286275	-1.80911	4.99453	-0.362219	0.717189	NA
ENSMUSG00000026251	2.69878	3.10966	2.33323	1.33277	0.182609	NA
ENSMUSG00000026253	4.89653	4.0403	2.00255	2.01758	0.0436348	NA
ENSMUSG00000026254	1016.59	-0.0290772	0.20114	-0.144562	0.885057	0.999783
ENSMUSG00000026255	1.73669	0.0892938	2.55252	0.0349827	0.972094	NA
ENSMUSG00000048000	517.993	-0.00676467	0.225979	-0.0299349	0.976119	0.999783
ENSMUSG00000026258	0.722057	0.618317	4.02924	0.153458	0.878037	NA
ENSMUSG00000026259	117.482	-0.475116	0.357987	-1.32719	0.184446	0.999783
ENSMUSG00000079434	35.1401	-0.685293	0.568514	-1.20541	0.228044	0.999783
ENSMUSG00000090994	0.224172	1.10814	4.99497	0.22185	0.82443	NA
ENSMUSG00000026288	562.687	-0.0412411	0.237336	-0.173767	0.862049	0.999783
ENSMUSG00000026289	515.71	0.00185935	0.242637	0.00766309	0.993886	0.999783
ENSMUSG00000087968	0.224172	1.10814	4.99497	0.22185	0.82443	NA
ENSMUSG00000089281	0.553722	-2.76995	4.84634	-0.571556	0.567623	NA
ENSMUSG00000056055	44.9157	0.0971779	0.510179	0.190478	0.848935	0.999783
ENSMUSG00000070738	1814.84	-0.337032	0.223592	-1.50735	0.13172	0.96429
ENSMUSG00000101942	2.14717	-1.92748	2.34822	-0.820822	0.411748	NA
ENSMUSG00000103996	0.728338	0.637273	3.7176	0.17142	0.863893	NA
ENSMUSG00000103591	1.85774	-1.69788	2.51606	-0.674818	0.499791	NA
ENSMUSG00000005501	371.848	-0.0752169	0.241646	-0.311269	0.755596	0.999783
ENSMUSG00000090124	20.4379	0.355114	0.749798	0.473613	0.635776	0.999783
ENSMUSG00000084195	0.217891	1.08747	4.99644	0.217648	0.827703	NA
ENSMUSG00000054545	0.494752	-0.348141	4.73921	-0.0734598	0.94144	NA
ENSMUSG00000089943	0.286275	-1.80911	4.99453	-0.362219	0.717189	NA
ENSMUSG00000081488	0.494752	-0.348141	4.73921	-0.0734598	0.94144	NA
ENSMUSG00000081984	0.224172	1.10814	4.99497	0.22185	0.82443	NA
ENSMUSG00000079429	98.2959	-0.00483286	0.414928	-0.0116475	0.990707	0.999783
ENSMUSG00000044783	2181.35	-0.125852	0.218696	-0.575466	0.564976	0.999783
ENSMUSG00000036251	0.217891	1.08747	4.99644	0.217648	0.827703	NA
ENSMUSG00000085420	0.217891	1.08747	4.99644	0.217648	0.827703	NA
ENSMUSG00000099553	0.217891	1.08747	4.99644	0.217648	0.827703	NA
ENSMUSG00000062310	477.062	0.436132	0.246575	1.76876	0.0769341	0.891742
ENSMUSG00000100798	88.0318	0.0217252	0.431603	0.050336	0.959855	0.999783
ENSMUSG00000104057	0.286275	-1.80911	4.99453	-0.362219	0.717189	NA
ENSMUSG00000100367	1.85548	2.46673	2.8808	0.856265	0.391851	NA
ENSMUSG00000049866	3017.61	-0.346296	0.188402	-1.83807	0.0660526	0.8614
ENSMUSG00000097398	3.89744	2.54869	1.87503	1.35928	0.174059	NA
ENSMUSG00000099378	0.563136	-2.79197	4.39419	-0.635378	0.525182	NA
ENSMUSG00000036206	725.169	-0.0739749	0.220752	-0.335104	0.737547	0.999783
ENSMUSG00000102700	36.0812	1.2971	0.580522	2.23437	0.0254588	0.6731
ENSMUSG00000102083	0.771612	-1.33411	3.93112	-0.339373	0.734329	NA
ENSMUSG00000055013	669.999	-0.200144	0.227285	-0.880586	0.378542	0.999783
ENSMUSG00000104114	1.69341	0.972624	2.8185	0.345086	0.73003	NA
ENSMUSG00000101662	0.728338	0.637273	3.7176	0.17142	0.863893	NA
ENSMUSG00000102009	1.06417	-1.91762	3.21978	-0.595577	0.551458	NA
ENSMUSG00000103252	1.35358	-2.3643	2.96156	-0.798329	0.424679	NA
ENSMUSG00000034486	0.995784	-0.329845	3.22388	-0.102313	0.918508	NA
ENSMUSG00000092627	4.48101	-0.359787	1.72269	-0.208851	0.834564	NA
ENSMUSG00000044337	426.708	0.558864	0.300891	1.85736	0.0632593	0.854395
ENSMUSG00000101951	0.653672	2.65942	4.50975	0.589705	0.555388	NA
ENSMUSG00000101028	1.63672	-2.66758	2.74882	-0.970447	0.331824	NA
ENSMUSG00000103292	1.67772	0.983153	2.45629	0.400259	0.688966	NA
ENSMUSG00000034432	754.528	-0.184958	0.227473	-0.813095	0.416163	0.999783
ENSMUSG00000056128	0.224172	1.10814	4.99497	0.22185	0.82443	NA
ENSMUSG00000048126	630.11	-0.160504	0.243881	-0.658123	0.510459	0.999783
ENSMUSG00000026303	18.2595	-0.15193	0.792121	-0.191801	0.847898	0.999783
ENSMUSG00000026304	80.8614	0.186264	0.438663	0.424618	0.671115	0.999783
ENSMUSG00000100791	0.217891	1.08747	4.99644	0.217648	0.827703	NA
ENSMUSG00000026305	1021.51	-0.0251754	0.22898	-0.109946	0.912452	0.999783
ENSMUSG00000070732	0.501033	-0.328159	4.71632	-0.0695794	0.944528	NA
ENSMUSG00000100018	2.52085	-0.349772	1.96482	-0.178017	0.85871	NA
ENSMUSG00000034353	603.222	-0.0558429	0.247817	-0.225339	0.821716	0.999783
ENSMUSG00000034343	716.41	-0.0324564	0.213464	-0.152046	0.879151	0.999783
ENSMUSG00000083064	30.0039	0.0814056	0.63512	0.128174	0.898012	0.999783
ENSMUSG00000026307	611.344	-0.184765	0.216922	-0.851759	0.394348	0.999783
ENSMUSG00000090322	3.45453	0.0762081	1.70551	0.0446834	0.96436	NA
ENSMUSG00000049515	5.59836	-1.67872	1.45577	-1.15315	0.248849	NA
ENSMUSG00000026308	17.3734	0.656756	0.802417	0.818472	0.413088	0.999783
ENSMUSG00000047443	62.2593	-0.203936	0.481132	-0.423868	0.671662	0.999783
ENSMUSG00000026309	975.099	0.0455472	0.204829	0.222367	0.824028	0.999783
ENSMUSG00000067071	387.08	-0.13992	0.2419	-0.578418	0.562982	0.999783
ENSMUSG00000055866	91.9397	-0.142717	0.401562	-0.355405	0.722286	0.999783
ENSMUSG00000034292	198.144	-0.178023	0.289041	-0.615908	0.537955	0.999783
ENSMUSG00000026311	83.835	1.03725e-05	0.397317	2.61065e-05	0.999979	0.999979
ENSMUSG00000100980	9.45814	-0.0436901	1.06141	-0.0411623	0.967167	0.999783
ENSMUSG00000007805	7.5376	0.313615	1.20174	0.260967	0.794118	0.999783
ENSMUSG00000101414	2.66494	4.68479	2.42199	1.93427	0.0530794	NA
ENSMUSG00000102745	1.36927	-2.36061	3.17916	-0.742525	0.457769	NA
ENSMUSG00000026313	390.906	0.0259372	0.259571	0.0999233	0.920405	0.999783
ENSMUSG00000103101	1.28519	-0.956456	2.8904	-0.330908	0.740714	NA
ENSMUSG00000026260	1020.72	-0.100939	0.199372	-0.506284	0.612657	0.999783
ENSMUSG00000073616	679.747	0.246013	0.218397	1.12645	0.259977	0.999783
ENSMUSG00000044055	3.43655	2.36904	1.9606	1.20832	0.226923	NA
ENSMUSG00000099665	0.930533	1.22401	3.64747	0.335578	0.737189	NA
ENSMUSG00000100781	0.563136	-2.79197	4.39419	-0.635378	0.525182	NA
ENSMUSG00000034220	3898.51	-0.225316	0.222935	-1.01068	0.31217	0.999783
ENSMUSG00000101995	3.29559	-0.579663	1.74111	-0.332927	0.739189	NA
ENSMUSG00000065470	0.504166	-0.371627	4.70508	-0.0789843	0.937045	NA
ENSMUSG00000034212	4.36604	-0.861594	1.52178	-0.566177	0.571274	NA
ENSMUSG00000047067	69.2997	-0.100373	0.443758	-0.226189	0.821055	0.999783
ENSMUSG00000097251	5.97537	-0.102645	1.30878	-0.078428	0.937488	NA
ENSMUSG00000026269	847.796	-0.334928	0.205573	-1.62924	0.103261	0.94072
ENSMUSG00000100632	1.22309	0.230246	2.75687	0.0835173	0.93344	NA
ENSMUSG00000026270	251.899	-0.292476	0.272091	-1.07492	0.282411	0.999783
ENSMUSG00000026271	172.524	-0.0544016	0.313522	-0.173518	0.862245	0.999783
ENSMUSG00000100021	0.217891	1.08747	4.99644	0.217648	0.827703	NA
ENSMUSG00000045091	0.224172	1.10814	4.99497	0.22185	0.82443	NA
ENSMUSG00000014602	15.071	-0.441264	0.867043	-0.508929	0.610802	0.999783
ENSMUSG00000026272	0.224172	1.10814	4.99497	0.22185	0.82443	NA
ENSMUSG00000034159	15.5508	-0.325679	0.980089	-0.332295	0.739667	0.999783
ENSMUSG00000084989	8.01436	1.11736	1.20447	0.92768	0.353574	0.999783
ENSMUSG00000047793	306.525	-0.265525	0.923452	-0.287535	0.773703	0.999783
ENSMUSG00000026273	197.655	-0.0448108	0.292122	-0.153398	0.878085	0.999783
ENSMUSG00000101172	0.884125	3.09358	3.61237	0.856386	0.391785	NA
ENSMUSG00000100351	0.722057	0.618317	4.02924	0.153458	0.878037	NA
ENSMUSG00000026274	120.072	-0.0061543	0.37216	-0.0165367	0.986806	0.999783
ENSMUSG00000026275	402.608	-0.0214381	0.236624	-0.0905999	0.92781	0.999783
ENSMUSG00000064389	0.448344	2.1121	4.89091	0.431841	0.665857	NA
ENSMUSG00000034107	0.839997	-3.36978	3.72407	-0.904864	0.365537	NA
ENSMUSG00000034088	4768.33	-0.228404	0.194898	-1.17191	0.241232	0.999783
ENSMUSG00000090489	1.38201	1.95173	2.93253	0.665544	0.505703	NA
ENSMUSG00000026276	12.7012	0.331799	0.913795	0.3631	0.71653	0.999783
ENSMUSG00000034066	25.4216	-0.64456	0.674029	-0.95628	0.338931	0.999783
ENSMUSG00000026277	1919.46	-0.166712	0.194401	-0.857567	0.391131	0.999783
ENSMUSG00000100927	0.286275	-1.80911	4.99453	-0.362219	0.717189	NA
ENSMUSG00000026278	975.286	-0.319095	0.199856	-1.59662	0.11035	0.94305
ENSMUSG00000026279	448.23	-0.116235	0.229445	-0.506592	0.612441	0.999783
ENSMUSG00000101952	0.276861	-1.78479	4.99626	-0.357225	0.720923	NA
ENSMUSG00000026280	764.86	-0.182574	0.214155	-0.852534	0.393918	0.999783
ENSMUSG00000026281	803.372	0.320411	0.217849	1.47079	0.141348	0.971815
ENSMUSG00000026283	371.294	-0.17229	0.239	-0.720882	0.470982	0.999783
ENSMUSG00000073609	36.8171	-0.651088	0.57057	-1.14112	0.253821	0.999783
ENSMUSG00000093805	2.3274	-1.32325	2.30005	-0.575312	0.56508	NA
ENSMUSG00000099624	3.52604	-0.349613	1.67533	-0.208683	0.834696	NA
ENSMUSG00000026285	64.6496	0.651787	0.488906	1.33315	0.182482	0.999783
ENSMUSG00000100347	13.8795	-0.152856	0.965902	-0.158253	0.874258	0.999783
ENSMUSG00000051185	204.335	0.292647	0.335324	0.872727	0.382812	0.999783
ENSMUSG00000103973	0.781027	-1.35463	3.6292	-0.373258	0.708956	NA
ENSMUSG00000081051	962.82	-0.146243	0.234829	-0.622762	0.533441	0.999783
ENSMUSG00000040710	63.3199	0.67387	0.551302	1.22232	0.221585	0.999783
ENSMUSG00000100362	0.224172	1.10814	4.99497	0.22185	0.82443	NA
ENSMUSG00000040693	0.276861	-1.78479	4.99626	-0.357225	0.720923	NA
ENSMUSG00000097814	0.572551	-2.81366	4.77965	-0.588674	0.55608	NA
ENSMUSG00000100454	0.286275	-1.80911	4.99453	-0.362219	0.717189	NA
ENSMUSG00000044757	4.21984	-0.19243	1.62365	-0.118517	0.905658	NA
ENSMUSG00000044768	189.245	0.364363	0.305203	1.19384	0.232542	0.999783
ENSMUSG00000040648	340.814	0.160554	0.307017	0.522947	0.601011	0.999783
ENSMUSG00000026333	52.5189	0.606925	0.501555	1.21009	0.226246	0.999783
ENSMUSG00000026335	1720.86	0.0421241	0.191154	0.220367	0.825585	0.999783
ENSMUSG00000104140	0.217891	1.08747	4.99644	0.217648	0.827703	NA
ENSMUSG00000089782	349.869	0.175996	0.246477	0.714044	0.4752	0.999783
ENSMUSG00000089706	10.8813	1.15127	1.00386	1.14685	0.251445	0.999783
ENSMUSG00000100182	1.89561	1.24163	2.31686	0.53591	0.592021	NA
ENSMUSG00000099634	7.03326	-0.344129	1.20912	-0.284611	0.775942	0.999783
ENSMUSG00000089791	7.68361	-0.736063	1.17241	-0.627823	0.53012	0.999783
ENSMUSG00000100009	75.9895	-0.130784	0.407972	-0.32057	0.748536	0.999783
ENSMUSG00000099686	2.1135	1.46073	2.21636	0.659069	0.509852	NA
ENSMUSG00000082431	236.683	0.104946	0.282267	0.371799	0.710043	0.999783
ENSMUSG00000099835	6.79966	-0.462398	1.24353	-0.371844	0.710009	0.999783
ENSMUSG00000100349	0.217891	1.08747	4.99644	0.217648	0.827703	NA
ENSMUSG00000099375	0.286275	-1.80911	4.99453	-0.362219	0.717189	NA
ENSMUSG00000050840	0.276861	-1.78479	4.99626	-0.357225	0.720923	NA
ENSMUSG00000047496	116.79	-0.530873	0.441791	-1.20164	0.229504	0.999783
ENSMUSG00000097482	15.0498	-0.332981	0.913545	-0.364493	0.71549	0.999783
ENSMUSG00000101214	2.33767	1.6553	2.14193	0.772807	0.439636	NA
ENSMUSG00000067017	21.892	-0.518649	0.777281	-0.667261	0.504606	0.999783
ENSMUSG00000056536	484.516	0.316752	0.226683	1.39734	0.162312	0.99062
ENSMUSG00000100672	1.99242	4.2656	2.65563	1.60625	0.108219	NA
ENSMUSG00000101656	0.224172	1.10814	4.99497	0.22185	0.82443	NA
ENSMUSG00000026319	286.244	0.349387	0.277716	1.25807	0.208366	0.999783
ENSMUSG00000104044	0.217891	1.08747	4.99644	0.217648	0.827703	NA
ENSMUSG00000101330	15.3517	-0.399336	0.834603	-0.478474	0.632313	0.999783
ENSMUSG00000026321	85.653	0.709868	0.445605	1.59304	0.111151	0.944174
ENSMUSG00000099843	27.4024	-0.146209	0.654871	-0.223263	0.823331	0.999783
ENSMUSG00000038866	423.617	0.0266441	0.233627	0.114045	0.909202	0.999783
ENSMUSG00000102501	1.1451	-3.81377	3.6072	-1.05727	0.290389	NA
ENSMUSG00000097612	1.39457	1.96642	2.88938	0.680569	0.496144	NA
ENSMUSG00000101583	0.501033	-0.328159	4.71632	-0.0695794	0.944528	NA
ENSMUSG00000044340	381.247	-0.58965	0.258332	-2.28253	0.0224583	0.635225
ENSMUSG00000103291	1.1547	1.64772	3.11573	0.528837	0.596918	NA
ENSMUSG00000100247	6.18785	1.10032	1.33257	0.825719	0.408964	NA
ENSMUSG00000099604	0.224172	1.10814	4.99497	0.22185	0.82443	NA
ENSMUSG00000057329	533.4	-0.0519443	0.271633	-0.19123	0.848346	0.999783
ENSMUSG00000054006	0.998918	-0.365643	3.22025	-0.113545	0.909599	NA
ENSMUSG00000103348	0.796723	-1.3576	3.88468	-0.349476	0.726732	NA
ENSMUSG00000009905	423.959	0.211356	0.240352	0.879357	0.379208	0.999783
ENSMUSG00000009907	593.04	0.111925	0.243429	0.459785	0.64567	0.999783
ENSMUSG00000067006	28.2902	-0.157768	0.741834	-0.212673	0.831582	0.999783
ENSMUSG00000059956	0.939948	1.20421	3.63393	0.33138	0.740357	NA
ENSMUSG00000062345	1.49367	-0.359349	2.70435	-0.132878	0.89429	NA
ENSMUSG00000092572	1.81779	2.43622	2.6938	0.90438	0.365794	NA
ENSMUSG00000026315	16.8876	0.903322	0.840219	1.0751	0.282328	0.999783
ENSMUSG00000086161	0.728338	0.637273	3.7176	0.17142	0.863893	NA
ENSMUSG00000100025	0.217891	1.08747	4.99644	0.217648	0.827703	NA
ENSMUSG00000100555	0.725205	0.675122	4.02283	0.167823	0.866723	NA
ENSMUSG00000102728	1.39772	1.99705	3.15638	0.632701	0.526929	NA
ENSMUSG00000038702	62.7246	0.675261	0.476546	1.41699	0.156485	0.98739
ENSMUSG00000101373	0.276861	-1.78479	4.99626	-0.357225	0.720923	NA
ENSMUSG00000099615	0.217891	1.08747	4.99644	0.217648	0.827703	NA
ENSMUSG00000102030	1.17355	1.67519	3.35283	0.499635	0.617332	NA
ENSMUSG00000026374	942.12	0.0701887	0.208046	0.337371	0.735837	0.999783
ENSMUSG00000026377	596.931	0.371705	0.243072	1.5292	0.126216	0.962661
ENSMUSG00000099936	0.217891	1.08747	4.99644	0.217648	0.827703	NA
ENSMUSG00000064302	537.042	-0.26328	0.24268	-1.08489	0.277972	0.999783
ENSMUSG00000107722	0.224172	1.10814	4.99497	0.22185	0.82443	NA
ENSMUSG00000026380	33.4372	1.31847	0.739763	1.78228	0.074703	0.884312
ENSMUSG00000048402	20.4195	0.175497	0.731601	0.239881	0.810423	0.999783
ENSMUSG00000101179	2.2534	-0.0430726	2.25575	-0.0190946	0.984766	NA
ENSMUSG00000037035	691.208	0.38568	0.221081	1.74451	0.0810694	0.896628
ENSMUSG00000004451	1134.56	0.212826	0.195913	1.08633	0.277332	0.999783
ENSMUSG00000098447	2.73874	-0.089874	1.88492	-0.0476805	0.961971	NA
ENSMUSG00000098923	254.331	0.129198	0.28248	0.457369	0.647406	0.999783
ENSMUSG00000101731	0.659953	2.67231	4.08735	0.653799	0.513241	NA
ENSMUSG00000026383	88.1039	0.196553	0.384908	0.510648	0.609598	0.999783
ENSMUSG00000026384	109.771	0.870314	0.458631	1.89764	0.057744	0.837908
ENSMUSG00000100636	0.276861	-1.78479	4.99626	-0.357225	0.720923	NA
ENSMUSG00000036975	99.9186	0.0634253	0.385603	0.164484	0.869351	0.999783
ENSMUSG00000026387	2.50515	-0.348635	1.9681	-0.177143	0.859396	NA
ENSMUSG00000050777	175.008	0.199776	0.314627	0.634964	0.525452	0.999783
ENSMUSG00000026385	791.769	0.0398086	0.207784	0.191587	0.848066	0.999783
ENSMUSG00000026388	31.3989	0.0385464	0.596452	0.0646261	0.948472	0.999783
ENSMUSG00000026389	82.7603	-0.369402	0.425978	-0.867186	0.38584	0.999783
ENSMUSG00000058665	1.9073	-2.93845	2.60675	-1.12725	0.259639	NA
ENSMUSG00000101386	0.217891	1.08747	4.99644	0.217648	0.827703	NA
ENSMUSG00000102360	0.286275	-1.80911	4.99453	-0.362219	0.717189	NA
ENSMUSG00000101700	0.224172	1.10814	4.99497	0.22185	0.82443	NA
ENSMUSG00000003721	481.164	0.0320775	0.231782	0.138395	0.889928	0.999783
ENSMUSG00000104253	6.16257	0.25491	1.4401	0.177009	0.859501	NA
ENSMUSG00000026339	227.43	-0.248124	0.280004	-0.886144	0.37554	0.999783
ENSMUSG00000050534	25.3382	0.109829	0.791165	0.138819	0.889593	0.999783
ENSMUSG00000001674	467.267	0.182465	0.227881	0.800704	0.423303	0.999783
ENSMUSG00000036815	0.666235	2.68473	4.07255	0.659227	0.50975	NA
ENSMUSG00000026341	2391.63	0.252089	0.207288	1.21613	0.223935	0.999783
ENSMUSG00000102063	0.217891	1.08747	4.99644	0.217648	0.827703	NA
ENSMUSG00000026342	258.153	0.280217	0.265516	1.05537	0.291258	0.999783
ENSMUSG00000026343	47.8378	-0.630648	0.505617	-1.24729	0.212293	0.999783
ENSMUSG00000026344	1.63044	-2.67979	2.75251	-0.973579	0.330266	NA
ENSMUSG00000049690	0.217891	1.08747	4.99644	0.217648	0.827703	NA
ENSMUSG00000036155	341.479	-0.157974	0.252273	-0.6262	0.531183	0.999783
ENSMUSG00000104378	3.97839	1.86814	1.83772	1.01655	0.309366	NA
ENSMUSG00000099471	12.9978	0.769038	0.926338	0.830192	0.40643	0.999783
ENSMUSG00000026347	4.17032	0.18578	1.63118	0.113893	0.909322	NA
ENSMUSG00000102014	1.5652	-1.32412	2.6757	-0.49487	0.620692	NA
ENSMUSG00000026349	611.348	0.267469	0.217682	1.22871	0.21918	0.999783
ENSMUSG00000051590	2.22829	-0.0305545	2.07511	-0.0147243	0.988252	NA
ENSMUSG00000036104	570.708	-0.229417	0.222972	-1.02891	0.303523	0.999783
ENSMUSG00000036086	100.828	0.57518	0.366579	1.56905	0.116636	0.950773
ENSMUSG00000099760	0.217891	1.08747	4.99644	0.217648	0.827703	NA
ENSMUSG00000104164	2.61681	-1.56767	2.00617	-0.781426	0.434552	NA
ENSMUSG00000058603	435.846	-0.143446	0.277126	-0.517621	0.604723	0.999783
ENSMUSG00000056211	525.573	0.040897	0.232873	0.175619	0.860593	0.999783
ENSMUSG00000104239	0.435781	2.07482	4.89366	0.423982	0.671579	NA
ENSMUSG00000102179	0.572551	-2.81366	4.77965	-0.588674	0.55608	NA
ENSMUSG00000026353	916.598	-0.11019	0.202143	-0.54511	0.585678	0.999783
ENSMUSG00000026354	0.442063	2.09356	4.84279	0.432305	0.66552	NA
ENSMUSG00000026355	1612.23	0.0315768	0.195939	0.161156	0.87197	0.999783
ENSMUSG00000026356	640.187	0.221817	0.238994	0.928129	0.353341	0.999783
ENSMUSG00000100078	99.3758	-0.0237283	0.416689	-0.056945	0.954589	0.999783
ENSMUSG00000045382	346.437	0.743706	0.255031	2.91614	0.0035439	0.252753
ENSMUSG00000097283	0.224172	1.10814	4.99497	0.22185	0.82443	NA
ENSMUSG00000042581	0.666235	2.68473	4.07255	0.659227	0.50975	NA
ENSMUSG00000089648	5.10397	0.341973	1.44669	0.236384	0.813135	NA
ENSMUSG00000094122	1.67143	0.97622	2.42272	0.402944	0.68699	NA
ENSMUSG00000086825	0.659953	2.67231	4.08735	0.653799	0.513241	NA
ENSMUSG00000026399	9.26471	-0.252493	1.14546	-0.220429	0.825537	0.999783
ENSMUSG00000026409	92.5624	0.00665418	0.375488	0.0177214	0.985861	0.999783
ENSMUSG00000046404	70.9709	0.539615	0.436115	1.23732	0.215967	0.999783
ENSMUSG00000104515	1.11458	3.4267	3.33489	1.02753	0.304171	NA
ENSMUSG00000042510	22.9042	-0.438127	0.70679	-0.619884	0.535334	0.999783
ENSMUSG00000099556	0.286275	-1.80911	4.99453	-0.362219	0.717189	NA
ENSMUSG00000086706	0.224172	1.10814	4.99497	0.22185	0.82443	NA
ENSMUSG00000026417	11.8024	3.71066	1.47722	2.51192	0.0120075	0.482436
ENSMUSG00000042474	0.849412	-3.38406	3.70889	-0.912419	0.361548	NA
ENSMUSG00000026420	11.1749	-1.11278	1.00151	-1.1111	0.266525	0.999783
ENSMUSG00000016524	0.217891	1.08747	4.99644	0.217648	0.827703	NA
ENSMUSG00000016529	3.54174	-0.350439	1.71146	-0.20476	0.837759	NA
ENSMUSG00000016528	2469.93	-0.0519785	0.189297	-0.274587	0.783633	0.999783
ENSMUSG00000102856	3.20295	2.22986	1.92807	1.15652	0.247467	NA
ENSMUSG00000016526	196.904	-0.633336	0.326848	-1.9377	0.0526594	0.825922
ENSMUSG00000026427	704.759	-0.164088	0.209521	-0.783159	0.433534	0.999783
ENSMUSG00000026430	233.765	0.185192	0.274188	0.675419	0.49941	0.999783
ENSMUSG00000101729	0.224172	1.10814	4.99497	0.22185	0.82443	NA
ENSMUSG00000042349	468.288	-0.0707913	0.231379	-0.305953	0.75964	0.999783
ENSMUSG00000102027	0.839997	-3.36978	3.72407	-0.904864	0.365537	NA
ENSMUSG00000102055	5.00402	-0.351909	1.43843	-0.244648	0.806729	NA
ENSMUSG00000026425	679.275	0.0324943	0.214842	0.151247	0.879781	0.999783
ENSMUSG00000076287	0.217891	1.08747	4.99644	0.217648	0.827703	NA
ENSMUSG00000055184	21.6995	0.656209	0.722721	0.907971	0.363894	0.999783
ENSMUSG00000095841	0.442063	2.09356	4.84279	0.432305	0.66552	NA
ENSMUSG00000004552	49.0242	-0.460259	0.528315	-0.871182	0.383655	0.999783
ENSMUSG00000052688	47.2275	-0.300403	0.529246	-0.567606	0.570303	0.999783
ENSMUSG00000042268	6.79738	0.493324	1.23739	0.398682	0.690128	0.999783
ENSMUSG00000042251	0.494752	-0.348141	4.73921	-0.0734598	0.94144	NA
ENSMUSG00000013275	276.864	-0.0795563	0.294186	-0.270428	0.786831	0.999783
ENSMUSG00000026433	104.365	0.0502678	0.361681	0.138984	0.889463	0.999783
ENSMUSG00000026434	1384.98	0.428314	0.216904	1.97467	0.0483052	0.792361
ENSMUSG00000103569	0.943096	1.24777	3.35359	0.372071	0.70984	NA
ENSMUSG00000026435	22.2566	-0.781536	0.703577	-1.1108	0.266653	0.999783
ENSMUSG00000026436	937.372	0.0572135	0.221973	0.25775	0.7966	0.999783
ENSMUSG00000059149	108.656	-0.288592	0.489593	-0.589454	0.555557	0.999783
ENSMUSG00000088779	0.224172	1.10814	4.99497	0.22185	0.82443	NA
ENSMUSG00000103966	4.30079	-0.525284	1.53064	-0.34318	0.731463	NA
ENSMUSG00000026437	439.348	-0.770281	0.233802	-3.29458	0.000985676	0.124875
ENSMUSG00000099874	0.286275	-1.80911	4.99453	-0.362219	0.717189	NA
ENSMUSG00000079330	4.17658	0.168006	1.54499	0.108742	0.913407	NA
ENSMUSG00000118219	9.42028	-0.588616	1.06674	-0.551788	0.581094	0.999783
ENSMUSG00000101549	9.4058	1.2332	1.09982	1.12127	0.262172	0.999783
ENSMUSG00000089808	1.37888	1.97471	2.89991	0.680954	0.4959	NA
ENSMUSG00000042115	73.3647	-0.281543	0.489039	-0.575707	0.564813	0.999783
ENSMUSG00000009772	443.64	0.0251007	0.247604	0.101375	0.919253	0.999783
ENSMUSG00000100658	2.95035	0.125359	1.84202	0.0680553	0.945742	NA
ENSMUSG00000042066	63.2221	-0.307829	0.449265	-0.685183	0.493228	0.999783
ENSMUSG00000042046	250.033	-0.573577	0.268524	-2.13604	0.0326764	0.718996
ENSMUSG00000097760	2.21887	-0.021274	2.10365	-0.0101129	0.991931	NA
ENSMUSG00000026439	362.61	-0.0578313	0.240257	-0.240706	0.809783	0.999783
ENSMUSG00000048174	108.742	-0.017588	0.370848	-0.0474264	0.962173	0.999783
ENSMUSG00000053024	0.276861	-1.78479	4.99626	-0.357225	0.720923	NA
ENSMUSG00000026442	1.2325	0.211627	2.93254	0.0721652	0.94247	NA
ENSMUSG00000026443	1.78309	-0.749372	2.34581	-0.319451	0.749385	NA
ENSMUSG00000102709	0.217891	1.08747	4.99644	0.217648	0.827703	NA
ENSMUSG00000054387	1493.77	0.184971	0.195115	0.948012	0.343123	0.999783
ENSMUSG00000100228	1.30089	-0.954083	2.90486	-0.328444	0.742576	NA
ENSMUSG00000026447	93.4599	0.474917	0.375523	1.26468	0.205986	0.999783
ENSMUSG00000102425	1.09573	3.40425	3.35429	1.01489	0.310156	NA
ENSMUSG00000046062	704.388	0.216706	0.21096	1.02724	0.304308	0.999783
ENSMUSG00000041757	13.8676	-0.0382076	0.874913	-0.0436702	0.965167	0.999783
ENSMUSG00000070644	1.05789	-1.93244	3.22641	-0.598944	0.54921	NA
ENSMUSG00000070643	63.1677	0.0534402	0.462881	0.115451	0.908087	0.999783
ENSMUSG00000064814	0.563136	-2.79197	4.39419	-0.635378	0.525182	NA
ENSMUSG00000090553	862.984	0.627997	0.263741	2.38111	0.0172605	0.574298
ENSMUSG00000102976	20.1506	-0.164309	0.751608	-0.21861	0.826954	0.999783
ENSMUSG00000094410	82.8615	-0.320136	0.516623	-0.619671	0.535475	0.999783
ENSMUSG00000051998	15.2615	1.13027	0.946535	1.19411	0.232433	0.999783
ENSMUSG00000026463	72.7009	0.163837	0.419344	0.390699	0.69602	0.999783
ENSMUSG00000102509	0.224172	1.10814	4.99497	0.22185	0.82443	NA
ENSMUSG00000100830	0.442063	2.09356	4.84279	0.432305	0.66552	NA
ENSMUSG00000010311	2.98191	2.08399	2.10516	0.989946	0.3222	NA
ENSMUSG00000041577	163.266	2.18548	1.54654	1.41314	0.157614	0.988319
ENSMUSG00000041559	7.59413	0.330148	1.23716	0.26686	0.789577	0.999783
ENSMUSG00000020423	166.394	0.159984	0.326258	0.49036	0.623879	0.999783
ENSMUSG00000102380	0.728338	0.637273	3.7176	0.17142	0.863893	NA
ENSMUSG00000026450	0.276861	-1.78479	4.99626	-0.357225	0.720923	NA
ENSMUSG00000064246	44.6122	0.723623	0.537514	1.34624	0.178225	0.999783
ENSMUSG00000042451	4.13975	1.9435	1.84781	1.05178	0.2929	NA
ENSMUSG00000042429	0.725205	0.675122	4.02283	0.167823	0.866723	NA
ENSMUSG00000026459	11.4076	1.6102	1.00974	1.59467	0.110787	0.943206
ENSMUSG00000026458	245.446	-0.0302848	0.299273	-0.101195	0.919396	0.999783
ENSMUSG00000042305	718.793	0.259834	0.212745	1.22134	0.221956	0.999783
ENSMUSG00000050526	0.276861	-1.78479	4.99626	-0.357225	0.720923	NA
ENSMUSG00000026456	829.339	0.306615	0.226186	1.35559	0.175231	0.996421
ENSMUSG00000026457	1974.96	-0.102706	0.185977	-0.552249	0.580778	0.999783
ENSMUSG00000102722	0.217891	1.08747	4.99644	0.217648	0.827703	NA
ENSMUSG00000026455	373.725	-0.18493	0.243223	-0.760334	0.447055	0.999783
ENSMUSG00000042229	348.278	0.0238635	0.247222	0.0965267	0.923102	0.999783
ENSMUSG00000077202	2.21574	-0.00444188	2.2676	-0.00195885	0.998437	NA
ENSMUSG00000096712	1.02089	-0.352169	3.44196	-0.102317	0.918505	NA
ENSMUSG00000046367	0.224172	1.10814	4.99497	0.22185	0.82443	NA
ENSMUSG00000042207	951.879	-0.191162	0.201235	-0.949948	0.342139	0.999783
ENSMUSG00000026452	20.4153	-0.395366	0.764967	-0.51684	0.605268	0.999783
ENSMUSG00000073557	804.459	-0.62546	0.224455	-2.78657	0.00532692	0.333626
ENSMUSG00000103614	0.877844	3.08421	3.64758	0.845551	0.397803	NA
ENSMUSG00000103976	3.76609	1.22994	1.67872	0.732665	0.463763	NA
ENSMUSG00000101168	0.217891	1.08747	4.99644	0.217648	0.827703	NA
ENSMUSG00000026429	133.775	0.564719	0.334822	1.68663	0.0916755	0.917833
ENSMUSG00000042793	816.019	0.337421	0.287168	1.175	0.239997	0.999783
ENSMUSG00000097993	82.4461	0.375211	0.422502	0.888068	0.374504	0.999783
ENSMUSG00000097988	0.217891	1.08747	4.99644	0.217648	0.827703	NA
ENSMUSG00000031506	215.486	0.0938818	0.290584	0.32308	0.746635	0.999783
ENSMUSG00000026426	1101.77	-0.136372	0.206896	-0.659132	0.509811	0.999783
ENSMUSG00000087721	3.60402	0.636816	1.71884	0.370492	0.711016	NA
ENSMUSG00000085311	12.051	1.05415	0.99842	1.05581	0.291053	0.999783
ENSMUSG00000026424	0.286275	-1.80911	4.99453	-0.362219	0.717189	NA
ENSMUSG00000079139	551.617	0.184724	0.229196	0.805965	0.420263	0.999783
ENSMUSG00000097680	29.6802	-0.181849	0.614619	-0.295873	0.767327	0.999783
ENSMUSG00000003051	191.719	1.04118	0.921705	1.12962	0.258636	0.999783
ENSMUSG00000041926	873.746	0.110096	0.206136	0.534095	0.593276	0.999783
ENSMUSG00000062580	508.684	0.0307612	0.222846	0.138038	0.89021	0.999783
ENSMUSG00000048096	11.9246	-1.12134	0.948457	-1.18228	0.237095	0.999783
ENSMUSG00000041889	160.699	0.0602911	0.326693	0.18455	0.853582	0.999783
ENSMUSG00000041879	1193.19	0.0577938	0.220943	0.261578	0.793647	0.999783
ENSMUSG00000009418	2013.96	-0.268187	0.219686	-1.22078	0.222171	0.999783
ENSMUSG00000102474	0.504166	-0.371627	4.70508	-0.0789843	0.937045	NA
ENSMUSG00000104524	7.03725	0.570572	1.23486	0.462054	0.644043	0.999783
ENSMUSG00000054412	2.64505	-1.58494	2.00075	-0.792173	0.42826	NA
ENSMUSG00000026421	2625.3	0.107172	0.196979	0.544076	0.586389	0.999783
ENSMUSG00000041801	365.929	0.063021	0.251409	0.250671	0.802068	0.999783
ENSMUSG00000026418	29.0663	0.55015	0.636525	0.864302	0.387422	0.999783
ENSMUSG00000041782	3261.07	-1.03219	0.193929	-5.3225	1.0235e-07	8.47573e-05
ENSMUSG00000026414	3255.54	-0.124153	0.198174	-0.626485	0.530997	0.999783
ENSMUSG00000101482	10.9792	-0.688695	0.983586	-0.700188	0.48381	0.999783
ENSMUSG00000026413	47.9854	-1.44678	0.575337	-2.51466	0.0119146	0.481917
ENSMUSG00000102414	16.4173	-0.294207	0.982476	-0.299455	0.764593	0.999783
ENSMUSG00000051985	16.3527	1.04269	0.839159	1.24254	0.214038	0.999783
ENSMUSG00000026411	1164.04	0.064422	0.20286	0.317569	0.750812	0.999783
ENSMUSG00000026407	3.71655	1.77262	1.73457	1.02194	0.306809	NA
ENSMUSG00000086264	1.36299	-2.37537	3.18447	-0.745923	0.455714	NA
ENSMUSG00000041642	253.13	-0.0421184	0.323737	-0.130101	0.896487	0.999783
ENSMUSG00000087230	23.5971	-0.687907	0.714922	-0.962213	0.335943	0.999783
ENSMUSG00000041605	860.71	-0.559795	0.210031	-2.6653	0.00769192	0.389985
ENSMUSG00000102941	1.21996	0.260068	2.94415	0.0883338	0.929611	NA
ENSMUSG00000097433	2.04825	2.63837	2.53709	1.03992	0.298376	NA
ENSMUSG00000052759	0.217891	1.08747	4.99644	0.217648	0.827703	NA
ENSMUSG00000041570	310.735	-0.184858	0.275489	-0.671018	0.502209	0.999783
ENSMUSG00000097403	13.0032	0.252998	0.912128	0.277371	0.781495	0.999783
ENSMUSG00000026404	96.6674	0.0262001	0.376202	0.0696438	0.944477	0.999783
ENSMUSG00000041498	110.967	0.231757	0.394342	0.587707	0.556729	0.999783
ENSMUSG00000099337	1.78309	-0.749372	2.34581	-0.319451	0.749385	NA
ENSMUSG00000104414	2.21574	-0.00444188	2.2676	-0.00195885	0.998437	NA
ENSMUSG00000104509	0.659953	2.67231	4.08735	0.653799	0.513241	NA
ENSMUSG00000097229	0.217891	1.08747	4.99644	0.217648	0.827703	NA
ENSMUSG00000041483	236.273	0.513791	0.303205	1.69453	0.0901639	0.917833
ENSMUSG00000097113	34.6492	0.354963	0.57181	0.620772	0.53475	0.999783
ENSMUSG00000097448	68.5419	0.424072	0.431432	0.982942	0.325636	0.999783
ENSMUSG00000096432	0.217891	1.08747	4.99644	0.217648	0.827703	NA
ENSMUSG00000104360	5.22506	-0.205557	1.40548	-0.146254	0.883721	NA
ENSMUSG00000103953	5.07326	0.640776	1.44307	0.444038	0.657015	NA
ENSMUSG00000026398	44.4806	0.0548521	0.583555	0.0939965	0.925112	0.999783
ENSMUSG00000098243	0.435781	2.07482	4.89366	0.423982	0.671579	NA
ENSMUSG00000104118	0.734619	0.653754	4.00329	0.163304	0.870279	NA
ENSMUSG00000103038	0.734619	0.653754	4.00329	0.163304	0.870279	NA
ENSMUSG00000102277	0.217891	1.08747	4.99644	0.217648	0.827703	NA
ENSMUSG00000102142	0.224172	1.10814	4.99497	0.22185	0.82443	NA
ENSMUSG00000104145	1.17668	1.64875	3.0969	0.532386	0.594458	NA
ENSMUSG00000103427	0.510447	-0.351662	4.68284	-0.075096	0.940138	NA
ENSMUSG00000098206	4.12076	0.535931	1.58268	0.338621	0.734895	NA
ENSMUSG00000026395	455.342	0.540906	0.271917	1.98923	0.0466756	0.786665
ENSMUSG00000104291	52.3074	2.37305	0.608819	3.8978	9.70725e-05	0.024116
ENSMUSG00000026394	0.224172	1.10814	4.99497	0.22185	0.82443	NA
ENSMUSG00000026393	1139.06	0.145276	0.229525	0.632941	0.526772	0.999783
ENSMUSG00000099510	0.286275	-1.80911	4.99453	-0.362219	0.717189	NA
ENSMUSG00000102651	1.73354	0.0597843	2.34239	0.0255228	0.979638	NA
ENSMUSG00000102448	1.30717	-0.938425	3.11131	-0.301617	0.762944	NA
ENSMUSG00000019230	2.77241	-3.52061	2.33177	-1.50985	0.131082	NA
ENSMUSG00000079283	128.167	-0.115489	0.356035	-0.324377	0.745653	0.999783
ENSMUSG00000056268	215.769	0.504264	0.308735	1.63333	0.102401	0.939566
ENSMUSG00000104900	0.217891	1.08747	4.99644	0.217648	0.827703	NA
ENSMUSG00000102626	0.435781	2.07482	4.89366	0.423982	0.671579	NA
ENSMUSG00000085361	0.435781	2.07482	4.89366	0.423982	0.671579	NA
ENSMUSG00000102451	0.435781	2.07482	4.89366	0.423982	0.671579	NA
ENSMUSG00000102243	1.7674	-0.749463	2.53515	-0.295628	0.767514	NA
ENSMUSG00000033964	167.377	0.389068	0.402457	0.966732	0.333678	0.999783
ENSMUSG00000033952	162.251	0.233644	0.342252	0.682667	0.494818	0.999783
ENSMUSG00000070594	0.276861	-1.78479	4.99626	-0.357225	0.720923	NA
ENSMUSG00000033898	1.11458	3.4267	3.33489	1.02753	0.304171	NA
ENSMUSG00000089991	3.2429	-0.135401	1.75129	-0.0773152	0.938373	NA
ENSMUSG00000104496	58.7755	-0.0716045	0.465125	-0.153947	0.877652	0.999783
ENSMUSG00000085867	1.66202	0.993529	2.57544	0.38577	0.699667	NA
ENSMUSG00000087930	0.276861	-1.78479	4.99626	-0.357225	0.720923	NA
ENSMUSG00000103691	0.224172	1.10814	4.99497	0.22185	0.82443	NA
ENSMUSG00000026365	281.977	0.997426	0.328033	3.04062	0.00236091	0.20342
ENSMUSG00000102500	0.884125	3.09358	3.61237	0.856386	0.391785	NA
ENSMUSG00000102740	0.787308	-1.33807	3.61897	-0.369736	0.711579	NA
ENSMUSG00000101795	276.909	-0.154849	0.264396	-0.585673	0.558095	0.999783
ENSMUSG00000026361	308.841	0.338049	0.314645	1.07438	0.282651	0.999783
ENSMUSG00000033849	1.05475	-1.90222	3.4869	-0.545534	0.585386	NA
ENSMUSG00000089640	2.63964	1.05744	2.13364	0.495602	0.620175	NA
ENSMUSG00000018196	256.842	0.104504	0.28311	0.369131	0.71203	0.999783
ENSMUSG00000018199	235.926	0.723958	0.391004	1.85154	0.0640926	0.854395
ENSMUSG00000018189	306.807	0.507743	0.291015	1.74473	0.0810314	0.896628
ENSMUSG00000100455	13.5201	0.619467	0.903985	0.685263	0.493178	0.999783
ENSMUSG00000026360	338.054	0.396228	0.257718	1.53745	0.124184	0.961295
ENSMUSG00000026358	126.049	0.561711	0.420025	1.33733	0.181116	0.999783
ENSMUSG00000100441	2.01981	-0.35865	2.19733	-0.163221	0.870345	NA
ENSMUSG00000026357	0.858826	-3.39868	4.0391	-0.841445	0.400098	NA
ENSMUSG00000101661	0.286275	-1.80911	4.99453	-0.362219	0.717189	NA
ENSMUSG00000035131	14.2039	-2.27503	0.935221	-2.43261	0.0149903	0.534559
ENSMUSG00000082588	0.217891	1.08747	4.99644	0.217648	0.827703	NA
ENSMUSG00000056220	386.061	0.554531	0.259121	2.14005	0.0323507	0.716522
ENSMUSG00000097028	23.9309	0.581153	0.68795	0.844761	0.398245	0.999783
ENSMUSG00000032487	228.563	0.511289	0.336983	1.51725	0.129203	0.96403
ENSMUSG00000097754	8.42487	0.596231	1.1487	0.519048	0.603727	0.999783
ENSMUSG00000099875	242.99	-0.167609	0.269489	-0.621949	0.533975	0.999783
ENSMUSG00000099447	0.672516	2.69738	4.45855	0.604991	0.545185	NA
ENSMUSG00000102990	0.504166	-0.371627	4.70508	-0.0789843	0.937045	NA
ENSMUSG00000006010	229.945	0.176338	0.291628	0.604666	0.545401	0.999783
ENSMUSG00000006005	1829.58	-0.275772	0.204779	-1.34668	0.178082	0.999783
ENSMUSG00000006014	8.47512	0.608783	1.20242	0.5063	0.612646	0.999783
ENSMUSG00000101519	0.448344	2.1121	4.89091	0.431841	0.665857	NA
ENSMUSG00000066842	3.37045	0.515688	1.89082	0.272733	0.785059	NA
ENSMUSG00000102628	0.217891	1.08747	4.99644	0.217648	0.827703	NA
ENSMUSG00000100954	23.869	-0.597679	0.679492	-0.879596	0.379078	0.999783
ENSMUSG00000023150	2571.43	-0.0797186	0.184079	-0.433067	0.664966	0.999783
ENSMUSG00000052748	108.767	0.492062	0.386415	1.2734	0.202875	0.999783
ENSMUSG00000053286	534.386	-0.0231835	0.229171	-0.101162	0.919422	0.999783
ENSMUSG00000106406	1.30717	-0.938425	3.11131	-0.301617	0.762944	NA
ENSMUSG00000103928	41.3144	0.139533	0.534517	0.261045	0.794058	0.999783
ENSMUSG00000026484	378.869	0.462786	0.276651	1.67282	0.0943632	0.922409
ENSMUSG00000103238	0.510447	-0.351662	4.68284	-0.075096	0.940138	NA
ENSMUSG00000100551	9.95308	0.451797	1.04185	0.433649	0.664544	0.999783
ENSMUSG00000026483	253.112	0.282182	0.304197	0.927628	0.3536	0.999783
ENSMUSG00000100594	9.49513	-0.195545	1.04508	-0.18711	0.851574	0.999783
ENSMUSG00000043019	230.949	-0.0908714	0.289394	-0.314006	0.753516	0.999783
ENSMUSG00000032666	178.204	0.00864685	0.305588	0.0282958	0.977426	0.999783
ENSMUSG00000014980	208.9	0.0204203	0.284378	0.0718069	0.942756	0.999783
ENSMUSG00000032649	5.35327	0.460621	1.38057	0.333646	0.738647	NA
ENSMUSG00000026482	371.455	0.77014	0.248762	3.09589	0.00196226	0.178805
ENSMUSG00000080950	2.00098	-0.339713	2.20345	-0.154173	0.877473	NA
ENSMUSG00000008475	1978.21	0.218795	0.204488	1.06996	0.284635	0.999783
ENSMUSG00000026480	637.224	0.431267	0.247983	1.7391	0.0820171	0.899075
ENSMUSG00000042772	881.732	-0.117316	0.204274	-0.574307	0.56576	0.999783
ENSMUSG00000100394	0.286275	-1.80911	4.99453	-0.362219	0.717189	NA
ENSMUSG00000100702	2.58295	-0.940703	1.96253	-0.479333	0.631702	NA
ENSMUSG00000042751	50.0692	-0.316873	0.501273	-0.632136	0.527298	0.999783
ENSMUSG00000026479	1999.51	-0.601837	0.206662	-2.91219	0.0035891	0.254758
ENSMUSG00000026478	3277.79	0.0047954	0.217213	0.0220769	0.982387	0.999783
ENSMUSG00000103818	0.435781	2.07482	4.89366	0.423982	0.671579	NA
ENSMUSG00000079138	1.29776	-0.925286	2.87992	-0.321289	0.747992	NA
ENSMUSG00000073538	9.25215	-0.256276	1.10994	-0.230892	0.817399	0.999783
ENSMUSG00000042708	5.77963	0.655234	1.33967	0.489102	0.624769	NA
ENSMUSG00000064435	0.286275	-1.80911	4.99453	-0.362219	0.717189	NA
ENSMUSG00000103543	1.60305	2.24109	2.74734	0.815732	0.414654	NA
ENSMUSG00000042699	1542.48	0.111896	0.193254	0.579009	0.562583	0.999783
ENSMUSG00000042684	54.2023	-0.000954162	0.549324	-0.00173697	0.998614	0.999783
ENSMUSG00000099858	6.05562	-0.596069	1.35873	-0.438695	0.660882	NA
ENSMUSG00000042671	5.34926	-0.766234	1.39255	-0.550237	0.582157	NA
ENSMUSG00000100334	0.949377	1.26018	3.62205	0.34792	0.7279	NA
ENSMUSG00000026475	212.697	0.226331	0.304077	0.744322	0.456682	0.999783
ENSMUSG00000099568	0.217891	1.08747	4.99644	0.217648	0.827703	NA
ENSMUSG00000066800	135.811	-0.0325721	0.325472	-0.100076	0.920284	0.999783
ENSMUSG00000100183	0.494752	-0.348141	4.73921	-0.0734598	0.94144	NA
ENSMUSG00000042641	0.224172	1.10814	4.99497	0.22185	0.82443	NA
ENSMUSG00000045968	1.73354	0.0597843	2.34239	0.0255228	0.979638	NA
ENSMUSG00000043282	0.286275	-1.80911	4.99453	-0.362219	0.717189	NA
ENSMUSG00000102459	0.510447	-0.351662	4.68284	-0.075096	0.940138	NA
ENSMUSG00000026473	738.589	0.0149709	0.22747	0.0658147	0.947525	0.999783
ENSMUSG00000100014	0.224172	1.10814	4.99497	0.22185	0.82443	NA
ENSMUSG00000101903	0.276861	-1.78479	4.99626	-0.357225	0.720923	NA
ENSMUSG00000004110	1.63985	-2.68816	2.78367	-0.965688	0.3342	NA
ENSMUSG00000096950	6.57321	0.40971	1.25781	0.325732	0.744627	0.999783
ENSMUSG00000056708	833.038	0.407286	0.209998	1.93948	0.0524433	0.825922
ENSMUSG00000026471	179.637	0.418864	0.295562	1.41717	0.156432	0.98739
ENSMUSG00000026470	750.101	0.0271039	0.21418	0.126548	0.899298	0.999783
ENSMUSG00000104181	0.276861	-1.78479	4.99626	-0.357225	0.720923	NA
ENSMUSG00000033722	21.5617	0.249659	0.710045	0.35161	0.725131	0.999783
ENSMUSG00000026469	305.284	0.0391459	0.251413	0.155704	0.876267	0.999783
ENSMUSG00000073535	2.07878	-1.08517	2.1824	-0.497238	0.619021	NA
ENSMUSG00000033701	649.076	-0.109927	0.227094	-0.484059	0.628344	0.999783
ENSMUSG00000026468	0.501033	-0.328159	4.71632	-0.0695794	0.944528	NA
ENSMUSG00000033684	2390.6	-0.0258352	0.244312	-0.105747	0.915783	0.999783
ENSMUSG00000102299	0.224172	1.10814	4.99497	0.22185	0.82443	NA
ENSMUSG00000033671	274.53	0.147693	0.268889	0.549271	0.582819	0.999783
ENSMUSG00000102837	0.949377	1.26018	3.62205	0.34792	0.7279	NA
ENSMUSG00000102833	1.17668	1.64875	3.0969	0.532386	0.594458	NA
ENSMUSG00000026466	812.01	0.0503832	0.206572	0.243901	0.807307	0.999783
ENSMUSG00000102964	2.94406	0.120348	1.8906	0.0636558	0.949244	NA
ENSMUSG00000050565	1212.75	0.247271	0.203911	1.21264	0.225267	0.999783
ENSMUSG00000060985	0.998918	-0.365643	3.22025	-0.113545	0.909599	NA
ENSMUSG00000103705	0.217891	1.08747	4.99644	0.217648	0.827703	NA
ENSMUSG00000026602	2.79144	-0.581966	2.11661	-0.274952	0.783353	NA
ENSMUSG00000026601	13.9487	0.209436	0.894781	0.234064	0.814935	0.999783
ENSMUSG00000078193	784.608	0.140549	0.235411	0.597036	0.550483	0.999783
ENSMUSG00000026600	1262.29	0.307385	0.194081	1.5838	0.11324	0.944518
ENSMUSG00000103199	1.1547	1.64772	3.11573	0.528837	0.596918	NA
ENSMUSG00000101523	31.6034	-0.14539	0.597433	-0.243358	0.807728	0.999783
ENSMUSG00000026596	754.411	-0.130795	0.221102	-0.591558	0.554147	0.999783
ENSMUSG00000104293	2.81986	1.23533	1.93087	0.639777	0.522317	NA
ENSMUSG00000060519	663.475	0.28165	0.216952	1.29821	0.194215	0.999783
ENSMUSG00000033557	441.107	-0.0431131	0.233013	-0.185024	0.85321	0.999783
ENSMUSG00000046057	10.7099	0.957076	1.02166	0.936782	0.348871	0.999783
ENSMUSG00000026594	210.273	-0.0110826	0.294736	-0.0376017	0.970005	0.999783
ENSMUSG00000101964	0.504166	-0.371627	4.70508	-0.0789843	0.937045	NA
ENSMUSG00000033544	4.07435	0.926057	1.62506	0.569859	0.568773	NA
ENSMUSG00000102960	1.0052	-0.349203	3.00405	-0.116244	0.907459	NA
ENSMUSG00000101905	0.728338	0.637273	3.7176	0.17142	0.863893	NA
ENSMUSG00000026592	0.442063	2.09356	4.84279	0.432305	0.66552	NA
ENSMUSG00000109913	0.224172	1.10814	4.99497	0.22185	0.82443	NA
ENSMUSG00000070565	84.6128	-0.251789	0.415546	-0.605923	0.544566	0.999783
ENSMUSG00000102326	0.217891	1.08747	4.99644	0.217648	0.827703	NA
ENSMUSG00000087632	2.15658	-1.93421	2.38919	-0.809567	0.418189	NA
ENSMUSG00000049881	306.14	0.0273805	0.257099	0.106498	0.915187	0.999783
ENSMUSG00000033488	21.2903	-0.0101556	0.714625	-0.0142111	0.988662	0.999783
ENSMUSG00000087093	0.286275	-1.80911	4.99453	-0.362219	0.717189	NA
ENSMUSG00000026589	18.9132	-0.894607	0.806806	-1.10883	0.267505	0.999783
ENSMUSG00000073530	7.83712	0.386834	1.18006	0.327809	0.743056	0.999783
ENSMUSG00000040782	344.637	0.130441	0.245801	0.530677	0.595643	0.999783
ENSMUSG00000103572	0.435781	2.07482	4.89366	0.423982	0.671579	NA
ENSMUSG00000015829	36.2916	1.98772	0.601319	3.30561	0.000947706	0.123917
ENSMUSG00000103225	0.286275	-1.80911	4.99453	-0.362219	0.717189	NA
ENSMUSG00000073528	0.217891	1.08747	4.99644	0.217648	0.827703	NA
ENSMUSG00000104111	0.276861	-1.78479	4.99626	-0.357225	0.720923	NA
ENSMUSG00000090394	270.487	-0.0571634	0.272225	-0.209986	0.833679	0.999783
ENSMUSG00000026729	1.04847	-1.91838	3.49453	-0.548967	0.583028	NA
ENSMUSG00000026725	19.7006	0.166752	0.755654	0.220672	0.825348	0.999783
ENSMUSG00000058267	568.75	0.0667341	0.236883	0.281718	0.77816	0.999783
ENSMUSG00000014226	758.773	0.44272	0.23519	1.88239	0.0597826	0.83921
ENSMUSG00000103006	3.44196	0.067849	1.70675	0.0397534	0.96829	NA
ENSMUSG00000026721	121.951	0.200814	0.389096	0.516105	0.605781	0.999783
ENSMUSG00000104302	0.224172	1.10814	4.99497	0.22185	0.82443	NA
ENSMUSG00000103693	6.52367	0.650797	1.26286	0.515336	0.606318	0.999783
ENSMUSG00000104026	0.224172	1.10814	4.99497	0.22185	0.82443	NA
ENSMUSG00000118401	1.083	-1.94431	3.45563	-0.562651	0.573673	NA
ENSMUSG00000103432	0.728338	0.637273	3.7176	0.17142	0.863893	NA
ENSMUSG00000102172	0.217891	1.08747	4.99644	0.217648	0.827703	NA
ENSMUSG00000103200	0.510447	-0.351662	4.68284	-0.075096	0.940138	NA
ENSMUSG00000103632	4.79956	0.889124	1.52651	0.582458	0.560258	NA
ENSMUSG00000104053	0.217891	1.08747	4.99644	0.217648	0.827703	NA
ENSMUSG00000057499	0.553722	-2.76995	4.84634	-0.571556	0.567623	NA
ENSMUSG00000040423	433.695	0.330155	0.236973	1.39322	0.163555	0.991437
ENSMUSG00000103343	0.510447	-0.351662	4.68284	-0.075096	0.940138	NA
ENSMUSG00000103739	2.21031	4.41553	2.56146	1.72383	0.0847381	NA
ENSMUSG00000026715	1.94201	0.390334	2.23189	0.17489	0.861166	NA
ENSMUSG00000103680	0.276861	-1.78479	4.99626	-0.357225	0.720923	NA
ENSMUSG00000043467	110.19	-0.0564961	0.372011	-0.151867	0.879292	0.999783
ENSMUSG00000104016	0.722057	0.618317	4.02924	0.153458	0.878037	NA
ENSMUSG00000053332	4213.6	0.328942	0.208837	1.57511	0.11523	0.950212
ENSMUSG00000026709	155.483	0.21967	0.316714	0.693589	0.48794	0.999783
ENSMUSG00000026708	111.356	0.777925	0.363312	2.1412	0.0322578	0.716522
ENSMUSG00000026705	168.366	0.154998	0.304413	0.509169	0.610634	0.999783
ENSMUSG00000102817	1.87676	1.22405	2.36493	0.517585	0.604748	NA
ENSMUSG00000026701	2982.36	-0.0355143	0.184085	-0.192924	0.847019	0.999783
ENSMUSG00000026700	3.95156	-1.80626	1.69264	-1.06713	0.285915	NA
ENSMUSG00000066755	0.563136	-2.79197	4.39419	-0.635378	0.525182	NA
ENSMUSG00000040323	55.1495	0.174563	0.477334	0.365704	0.714586	0.999783
ENSMUSG00000102399	1.71156	0.0550037	2.56413	0.0214512	0.982886	NA
ENSMUSG00000000817	8.59305	0.248532	1.13995	0.21802	0.827414	0.999783
ENSMUSG00000103625	0.435781	2.07482	4.89366	0.423982	0.671579	NA
ENSMUSG00000040297	399.726	0.243621	0.247131	0.985799	0.324232	0.999783
ENSMUSG00000102254	1.05789	-1.93244	3.22641	-0.598944	0.54921	NA
ENSMUSG00000026698	216.009	0.288917	0.28431	1.0162	0.309532	0.999783
ENSMUSG00000040265	7.89209	-0.628196	1.14643	-0.54796	0.583719	0.999783
ENSMUSG00000078190	4.07122	0.936295	1.69118	0.553634	0.57983	NA
ENSMUSG00000026694	323.944	-0.161586	0.272649	-0.592651	0.553415	0.999783
ENSMUSG00000026696	252.469	0.197379	0.313534	0.629531	0.529001	0.999783
ENSMUSG00000026697	2.0104	-0.349204	2.17433	-0.160603	0.872406	NA
ENSMUSG00000040225	1544.93	-0.165593	0.206707	-0.8011	0.423074	0.999783
ENSMUSG00000098259	1.56834	-1.34924	2.49451	-0.540884	0.588588	NA
ENSMUSG00000026692	0.448344	2.1121	4.89091	0.431841	0.665857	NA
ENSMUSG00000040181	10.877	-0.42265	1.00455	-0.420735	0.673948	0.999783
ENSMUSG00000040170	65.6741	0.0379321	0.576226	0.0658284	0.947514	0.999783
ENSMUSG00000026691	0.728338	0.637273	3.7176	0.17142	0.863893	NA
ENSMUSG00000026586	71.3217	-0.00428525	0.420556	-0.0101895	0.99187	0.999783
ENSMUSG00000092188	11.1383	-0.0273935	0.970172	-0.0282357	0.977474	0.999783
ENSMUSG00000103195	2.37151	0.866438	2.11819	0.409046	0.682506	NA
ENSMUSG00000040124	426.518	0.256225	0.243496	1.05228	0.292673	0.999783
ENSMUSG00000101869	0.217891	1.08747	4.99644	0.217648	0.827703	NA
ENSMUSG00000102117	5.96908	-0.119827	1.33102	-0.090026	0.928267	NA
ENSMUSG00000026585	812.415	0.0291584	0.217359	0.134149	0.893285	0.999783
ENSMUSG00000026584	191.61	-0.00375485	0.289264	-0.0129807	0.989643	0.999783
ENSMUSG00000041406	97.1836	0.416245	0.385278	1.08038	0.279975	0.999783
ENSMUSG00000041396	73.1018	0.544809	0.470004	1.15916	0.246392	0.999783
ENSMUSG00000026582	7.98194	-0.352326	1.21548	-0.289866	0.771919	0.999783
ENSMUSG00000026581	39.7366	0.195454	0.548022	0.356654	0.721351	0.999783
ENSMUSG00000026580	38.8091	0.159362	0.57765	0.275879	0.782641	0.999783
ENSMUSG00000090081	0.501033	-0.328159	4.71632	-0.0695794	0.944528	NA
ENSMUSG00000086593	0.504166	-0.371627	4.70508	-0.0789843	0.937045	NA
ENSMUSG00000026579	92.2345	1.7046	0.451078	3.77895	0.000157492	0.0350384
ENSMUSG00000040918	84.1489	0.384148	0.407242	0.943291	0.345532	0.999783
ENSMUSG00000026578	170.548	0.161211	0.303531	0.53112	0.595336	0.999783
ENSMUSG00000026577	152.67	-0.0946813	0.311471	-0.303981	0.761142	0.999783
ENSMUSG00000026575	188.541	0.157549	0.293695	0.536436	0.591657	0.999783
ENSMUSG00000103493	0.728338	0.637273	3.7176	0.17142	0.863893	NA
ENSMUSG00000026576	210.837	0.383785	0.342413	1.12082	0.262363	0.999783
ENSMUSG00000104011	1.79564	-0.779093	2.34105	-0.332796	0.739288	NA
ENSMUSG00000103383	0.217891	1.08747	4.99644	0.217648	0.827703	NA
ENSMUSG00000026574	51.9088	3.72439	0.691983	5.3822	7.35823e-08	6.45187e-05
ENSMUSG00000103320	0.224172	1.10814	4.99497	0.22185	0.82443	NA
ENSMUSG00000026573	8.28965	2.29234	1.24662	1.83884	0.0659382	0.8614
ENSMUSG00000089967	0.501033	-0.328159	4.71632	-0.0695794	0.944528	NA
ENSMUSG00000040848	1009.39	-0.38535	0.210563	-1.83009	0.0672361	0.866224
ENSMUSG00000040843	526.447	0.110267	0.230173	0.47906	0.631896	0.999783
ENSMUSG00000102302	7.15451	-0.0486209	1.23277	-0.0394404	0.968539	0.999783
ENSMUSG00000040836	115.457	-0.306261	0.353735	-0.865792	0.386604	0.999783
ENSMUSG00000026571	396.633	-0.0450878	0.239753	-0.188059	0.85083	0.999783
ENSMUSG00000104427	0.286275	-1.80911	4.99453	-0.362219	0.717189	NA
ENSMUSG00000102401	0.442063	2.09356	4.84279	0.432305	0.66552	NA
ENSMUSG00000026568	273.973	0.251222	0.285122	0.881104	0.378262	0.999783
ENSMUSG00000026567	4.12701	0.494686	1.79904	0.274972	0.783338	NA
ENSMUSG00000089291	0.217891	1.08747	4.99644	0.217648	0.827703	NA
ENSMUSG00000104474	0.286275	-1.80911	4.99453	-0.362219	0.717189	NA
ENSMUSG00000026566	1313.65	-0.0466137	0.203557	-0.228996	0.818872	0.999783
ENSMUSG00000103098	1.77994	-0.780344	2.49148	-0.313205	0.754125	NA
ENSMUSG00000040723	103.879	0.172924	0.378695	0.456631	0.647936	0.999783
ENSMUSG00000040713	269.186	0.297678	0.261496	1.13837	0.254967	0.999783
ENSMUSG00000089829	0.435781	2.07482	4.89366	0.423982	0.671579	NA
ENSMUSG00000005763	12.581	1.13541	0.948786	1.1967	0.231423	0.999783
ENSMUSG00000026565	153.331	0.11041	0.32737	0.337262	0.735919	0.999783
ENSMUSG00000026564	94.8684	2.17468	0.452316	4.80787	1.52546e-06	0.000878158
ENSMUSG00000000544	1474.74	-0.659347	0.200547	-3.28773	0.00100997	0.125455
ENSMUSG00000040612	25.2873	0.793648	0.726223	1.09284	0.274463	0.999783
ENSMUSG00000103400	19.6167	0.48988	0.756096	0.647907	0.517045	0.999783
ENSMUSG00000026563	133.846	-0.40951	0.367315	-1.11487	0.264905	0.999783
ENSMUSG00000040596	752.733	-0.240592	0.224532	-1.07153	0.283932	0.999783
ENSMUSG00000084093	24.1932	-0.409382	0.672652	-0.608609	0.542784	0.999783
ENSMUSG00000085841	0.224172	1.10814	4.99497	0.22185	0.82443	NA
ENSMUSG00000086925	1.45982	0.668291	2.78053	0.240346	0.810062	NA
ENSMUSG00000102548	0.217891	1.08747	4.99644	0.217648	0.827703	NA
ENSMUSG00000097823	2.10408	1.47685	2.34304	0.630314	0.528489	NA
ENSMUSG00000060568	26.3992	0.745271	0.664096	1.12223	0.261763	0.999783
ENSMUSG00000026558	1827.86	-0.0234886	0.196974	-0.119247	0.905079	0.999783
ENSMUSG00000103139	0.276861	-1.78479	4.99626	-0.357225	0.720923	NA
ENSMUSG00000102909	1.34416	-2.35398	2.94227	-0.800054	0.423679	NA
ENSMUSG00000052428	351.551	0.580406	0.271047	2.14135	0.0322462	0.716522
ENSMUSG00000088246	3.08398	-0.834355	1.79669	-0.464384	0.642373	NA
ENSMUSG00000026687	506.717	-0.0154444	0.229449	-0.0673107	0.946334	0.999783
ENSMUSG00000026688	238.682	-0.130906	0.280392	-0.466868	0.640594	0.999783
ENSMUSG00000015843	0.224172	1.10814	4.99497	0.22185	0.82443	NA
ENSMUSG00000052534	969.015	0.107363	0.211344	0.508003	0.611451	0.999783
ENSMUSG00000103780	2.55556	1.82278	2.07048	0.880368	0.37866	NA
ENSMUSG00000102594	1.45039	0.624216	2.74778	0.227171	0.820291	NA
ENSMUSG00000103463	0.217891	1.08747	4.99644	0.217648	0.827703	NA
ENSMUSG00000026683	153.766	0.854064	0.325311	2.62538	0.00865523	0.412188
ENSMUSG00000026678	857.608	1.31715	0.211118	6.23894	4.4056e-10	6.56698e-07
ENSMUSG00000038530	73.3892	1.25645	0.455083	2.76094	0.00576361	0.342176
ENSMUSG00000026675	56.3199	0.535267	0.485425	1.10268	0.270168	0.999783
ENSMUSG00000097503	3.28304	-0.563296	1.74976	-0.321927	0.747508	NA
ENSMUSG00000026674	827.412	0.388872	0.218769	1.77754	0.0754792	0.887998
ENSMUSG00000026670	463.408	-0.0278737	0.23265	-0.11981	0.904634	0.999783
ENSMUSG00000104266	0.95251	1.22955	3.34196	0.367914	0.712937	NA
ENSMUSG00000103908	0.224172	1.10814	4.99497	0.22185	0.82443	NA
ENSMUSG00000026667	482.045	0.151041	0.261907	0.576699	0.564143	0.999783
ENSMUSG00000044306	1.17355	1.67519	3.35283	0.499635	0.617332	NA
ENSMUSG00000073494	3.10215	-1.3414	1.90925	-0.70258	0.482317	NA
ENSMUSG00000096964	2.02609	-0.350629	2.22117	-0.157858	0.874569	NA
ENSMUSG00000102418	57.9298	0.516763	0.493338	1.04748	0.294877	0.999783
ENSMUSG00000102752	31.7461	1.0928	0.715824	1.52663	0.126853	0.962763
ENSMUSG00000038473	3.88403	0.390393	1.61673	0.241471	0.80919	NA
ENSMUSG00000042800	0.510447	-0.351662	4.68284	-0.075096	0.940138	NA
ENSMUSG00000102193	3.47563	-2.09049	1.78708	-1.16978	0.242088	NA
ENSMUSG00000038463	296.969	0.92736	0.272581	3.40214	0.000668603	0.0967592
ENSMUSG00000026663	487.556	-0.100874	0.234008	-0.43107	0.666417	0.999783
ENSMUSG00000096547	0.501033	-0.328159	4.71632	-0.0695794	0.944528	NA
ENSMUSG00000053925	13.9739	0.213513	0.872283	0.244774	0.806631	0.999783
ENSMUSG00000026659	97.8165	0.224211	0.381853	0.587165	0.557093	0.999783
ENSMUSG00000096968	1.22624	0.272704	3.18646	0.0855821	0.931799	NA
ENSMUSG00000070524	52.7706	-0.78077	0.503253	-1.55144	0.120795	0.955865
ENSMUSG00000038421	3.08085	-0.822487	1.83384	-0.448506	0.653788	NA
ENSMUSG00000089838	27.7516	1.33733	0.652918	2.04824	0.0405369	0.754442
ENSMUSG00000026656	1591.42	-0.031123	0.223949	-0.138973	0.889471	0.999783
ENSMUSG00000104340	2.28185	2.83567	2.48238	1.14232	0.253322	NA
ENSMUSG00000059089	530.526	0.365261	0.238486	1.53158	0.125625	0.962231
ENSMUSG00000059498	1330.39	-0.0254299	0.222438	-0.114323	0.908982	0.999783
ENSMUSG00000026649	41.655	-0.437896	0.528766	-0.828146	0.407588	0.999783
ENSMUSG00000058076	1466.9	-0.074792	0.193827	-0.385869	0.699594	0.999783
ENSMUSG00000056569	1.83664	2.45233	2.62587	0.933913	0.350349	NA
ENSMUSG00000038370	2.51456	-0.356206	1.96607	-0.181177	0.856229	NA
ENSMUSG00000005677	0.896688	3.11246	3.96648	0.784692	0.432634	NA
ENSMUSG00000005674	71.5424	-0.354772	0.429524	-0.825965	0.408824	0.999783
ENSMUSG00000005681	1.05789	-1.93244	3.22641	-0.598944	0.54921	NA
ENSMUSG00000058715	1001.02	0.521702	0.218895	2.38334	0.0171562	0.572103
ENSMUSG00000013593	2070.61	-0.0589118	0.185342	-0.317855	0.750595	0.999783
ENSMUSG00000006403	350.851	-0.00398518	0.278698	-0.0142993	0.988591	0.999783
ENSMUSG00000052423	372.876	-0.18153	0.256632	-0.707353	0.479347	0.999783
ENSMUSG00000062729	474.044	0.0111904	0.236434	0.0473298	0.96225	0.999783
ENSMUSG00000053483	500.141	-0.0970926	0.232758	-0.417139	0.676577	0.999783
ENSMUSG00000062963	765.929	-0.0112522	0.210663	-0.0534132	0.957403	0.999783
ENSMUSG00000103983	37.5845	0.37622	0.555727	0.676988	0.498414	0.999783
ENSMUSG00000013973	81.8469	-0.0983604	0.405341	-0.242661	0.808268	0.999783
ENSMUSG00000013997	333.568	-0.144838	0.245989	-0.588802	0.555994	0.999783
ENSMUSG00000006412	813.465	0.0185662	0.217862	0.0852196	0.932087	0.999783
ENSMUSG00000102929	4.35435	0.656581	1.54126	0.426003	0.670105	NA
ENSMUSG00000045259	0.217891	1.08747	4.99644	0.217648	0.827703	NA
ENSMUSG00000006411	130.445	0.0612051	0.48496	0.126206	0.899569	0.999783
ENSMUSG00000048865	423.65	0.129151	0.285685	0.452076	0.651214	0.999783
ENSMUSG00000026641	1163.86	-0.0714658	0.198519	-0.359996	0.71885	0.999783
ENSMUSG00000103711	34.8288	-0.0604722	0.580798	-0.104119	0.917075	0.999783
ENSMUSG00000038235	1718.28	0.0168999	0.193012	0.0875591	0.930227	0.999783
ENSMUSG00000091993	0.217891	1.08747	4.99644	0.217648	0.827703	NA
ENSMUSG00000060244	11.8414	-0.406861	0.944243	-0.430886	0.666551	0.999783
ENSMUSG00000038218	0.95251	1.22955	3.34196	0.367914	0.712937	NA
ENSMUSG00000038209	33.9382	0.743405	0.588315	1.26362	0.206367	0.999783
ENSMUSG00000004709	40.1112	1.51785	0.583051	2.6033	0.0092332	0.424784
ENSMUSG00000004707	173.933	0.221881	0.309367	0.717209	0.473245	0.999783
ENSMUSG00000038179	5.50592	0.855319	1.40098	0.610513	0.541522	NA
ENSMUSG00000103083	0.501033	-0.328159	4.71632	-0.0695794	0.944528	NA
ENSMUSG00000015355	89.5436	0.588951	0.388975	1.51411	0.129998	0.96403
ENSMUSG00000103883	2.74275	3.13405	2.57764	1.21586	0.224038	NA
ENSMUSG00000059058	89.8852	-0.173569	0.384279	-0.451674	0.651504	0.999783
ENSMUSG00000015316	1.27893	-0.897233	3.13512	-0.286188	0.774734	NA
ENSMUSG00000038147	365.195	0.423348	0.284329	1.48894	0.136504	0.967996
ENSMUSG00000073492	2.28413	-0.651467	2.1203	-0.307252	0.758652	NA
ENSMUSG00000015314	39.0177	0.186869	0.550937	0.339183	0.734472	0.999783
ENSMUSG00000026556	175.366	-0.57797	0.312395	-1.85013	0.0642955	0.854395
ENSMUSG00000003458	1758.63	-0.145858	0.203147	-0.717993	0.472762	0.999783
ENSMUSG00000026553	2912.42	-0.174851	0.195804	-0.892987	0.371864	0.999783
ENSMUSG00000103380	0.217891	1.08747	4.99644	0.217648	0.827703	NA
ENSMUSG00000003464	878.336	-0.218291	0.203944	-1.07034	0.284464	0.999783
ENSMUSG00000089803	1.63672	-2.66758	2.74882	-0.970447	0.331824	NA
ENSMUSG00000026554	1880.71	-0.114422	0.199592	-0.573276	0.566458	0.999783
ENSMUSG00000013698	1530.23	-0.159179	0.192286	-0.827825	0.40777	0.999783
ENSMUSG00000007122	18.7449	2.33911	0.837763	2.79209	0.00523693	0.33077
ENSMUSG00000092085	0.217891	1.08747	4.99644	0.217648	0.827703	NA
ENSMUSG00000007107	1.27893	-0.897233	3.13512	-0.286188	0.774734	NA
ENSMUSG00000038034	2720.23	-0.129642	0.1919	-0.675571	0.499313	0.999783
ENSMUSG00000007097	89.5309	1.44963	0.414314	3.49886	0.000467259	0.0790643
ENSMUSG00000038026	9.05534	-1.11846	1.12332	-0.995671	0.31941	0.999783
ENSMUSG00000102413	0.781027	-1.35463	3.6292	-0.373258	0.708956	NA
ENSMUSG00000044708	62.0614	0.303381	0.46193	0.656767	0.511331	0.999783
ENSMUSG00000050229	249.704	0.416587	0.266484	1.56327	0.117988	0.952208
ENSMUSG00000102278	1.1704	1.63995	3.07657	0.533047	0.594001	NA
ENSMUSG00000103357	0.494752	-0.348141	4.73921	-0.0734598	0.94144	NA
ENSMUSG00000026548	209.569	0.479742	0.282535	1.69799	0.0895092	0.915734
ENSMUSG00000037995	561.688	-0.389138	0.7786	-0.499792	0.617222	0.999783
ENSMUSG00000026547	4629	0.0660568	0.18625	0.354667	0.722839	0.999783
ENSMUSG00000026546	6.80385	1.31328	1.32195	0.993446	0.320493	0.999783
ENSMUSG00000085184	3.62288	0.672129	1.75253	0.38352	0.701334	NA
ENSMUSG00000049598	9.90245	-0.58953	1.10807	-0.532031	0.594705	0.999783
ENSMUSG00000053318	128.438	0.477376	0.377767	1.26368	0.206346	0.999783
ENSMUSG00000070504	22.9865	-1.11283	0.716403	-1.55336	0.120337	0.955865
ENSMUSG00000026544	12.0396	-0.908511	0.956149	-0.950177	0.342022	0.999783
ENSMUSG00000060128	0.224172	1.10814	4.99497	0.22185	0.82443	NA
ENSMUSG00000005339	0.286275	-1.80911	4.99453	-0.362219	0.717189	NA
ENSMUSG00000037872	2.97232	0.127567	1.85693	0.0686977	0.94523	NA
ENSMUSG00000005338	7.21851	2.93142	1.46004	2.00776	0.0446686	0.777304
ENSMUSG00000037860	94.1965	0.304436	0.395883	0.769005	0.44189	0.999783
ENSMUSG00000037849	2.27784	-0.659453	2.09639	-0.314566	0.753091	NA
ENSMUSG00000070501	7.83713	0.398233	1.21402	0.328029	0.74289	0.999783
ENSMUSG00000073491	0.224172	1.10814	4.99497	0.22185	0.82443	NA
ENSMUSG00000043263	28.4529	1.24679	0.710017	1.756	0.0790888	0.896628
ENSMUSG00000066677	5.37209	0.451577	1.41098	0.320044	0.748935	NA
ENSMUSG00000103051	0.286275	-1.80911	4.99453	-0.362219	0.717189	NA
ENSMUSG00000073490	157.014	0.48501	0.3274	1.4814	0.1385	0.971519
ENSMUSG00000073489	1247.45	0.544315	0.236448	2.30205	0.0213323	0.622791
ENSMUSG00000090222	31.5137	-0.0513082	0.595748	-0.0861241	0.931368	0.999783
ENSMUSG00000102187	0.224172	1.10814	4.99497	0.22185	0.82443	NA
ENSMUSG00000090272	642.843	0.630894	0.271894	2.32037	0.020321	0.605749
ENSMUSG00000026536	210.259	0.156024	0.287934	0.541872	0.587907	0.999783
ENSMUSG00000039997	1442.02	0.529124	0.260625	2.03021	0.0423349	0.763975
ENSMUSG00000026535	1137.88	0.806901	0.290551	2.77714	0.0054839	0.337781
ENSMUSG00000103588	0.659953	2.67231	4.08735	0.653799	0.513241	NA
ENSMUSG00000054203	15.5303	0.167339	0.856866	0.195292	0.845164	0.999783
ENSMUSG00000045381	0.224172	1.10814	4.99497	0.22185	0.82443	NA
ENSMUSG00000026532	0.777894	-1.31633	3.91919	-0.335868	0.73697	NA
ENSMUSG00000050069	17.0858	-1.61534	0.842434	-1.91747	0.0551779	0.830146
ENSMUSG00000103079	0.286275	-1.80911	4.99453	-0.362219	0.717189	NA
ENSMUSG00000026526	838.547	-0.0288612	0.204265	-0.141293	0.887639	0.999783
ENSMUSG00000039783	11.6594	-1.7607	0.985147	-1.78725	0.0738977	0.884159
ENSMUSG00000026525	30.68	0.0181398	0.622918	0.0291206	0.976768	0.999783
ENSMUSG00000078185	41.3484	0.621896	0.56828	1.09435	0.273802	0.999783
ENSMUSG00000039748	89.2769	0.253601	0.393004	0.64529	0.51874	0.999783
ENSMUSG00000104158	0.435781	2.07482	4.89366	0.423982	0.671579	NA
ENSMUSG00000078184	35.4975	-0.0519311	0.582359	-0.0891737	0.928944	0.999783
ENSMUSG00000087875	0.286275	-1.80911	4.99453	-0.362219	0.717189	NA
ENSMUSG00000057335	376.941	0.145386	0.271646	0.535203	0.592509	0.999783
ENSMUSG00000103634	0.435781	2.07482	4.89366	0.423982	0.671579	NA
ENSMUSG00000104154	0.217891	1.08747	4.99644	0.217648	0.827703	NA
ENSMUSG00000103435	0.217891	1.08747	4.99644	0.217648	0.827703	NA
ENSMUSG00000065573	0.448344	2.1121	4.89091	0.431841	0.665857	NA
ENSMUSG00000026504	236.091	0.0666701	0.280034	0.238078	0.81182	0.999783
ENSMUSG00000103367	86.9065	-0.212496	0.435186	-0.488287	0.625346	0.999783
ENSMUSG00000102475	0.286275	-1.80911	4.99453	-0.362219	0.717189	NA
ENSMUSG00000102211	14.4768	1.57239	0.910689	1.72659	0.0842413	0.904838
ENSMUSG00000087082	0.501033	-0.328159	4.71632	-0.0695794	0.944528	NA
ENSMUSG00000103251	0.501033	-0.328159	4.71632	-0.0695794	0.944528	NA
ENSMUSG00000019699	485.272	-0.0231968	0.228	-0.10174	0.918963	0.999783
ENSMUSG00000104391	1.21681	0.218557	2.97273	0.0735205	0.941392	NA
ENSMUSG00000102133	0.949377	1.26018	3.62205	0.34792	0.7279	NA
ENSMUSG00000102749	0.276861	-1.78479	4.99626	-0.357225	0.720923	NA
ENSMUSG00000103163	0.217891	1.08747	4.99644	0.217648	0.827703	NA
ENSMUSG00000103646	0.442063	2.09356	4.84279	0.432305	0.66552	NA
ENSMUSG00000102427	0.884125	3.09358	3.61237	0.856386	0.391785	NA
ENSMUSG00000103633	0.858826	-3.39868	4.0391	-0.841445	0.400098	NA
ENSMUSG00000063659	304.686	-0.0764658	0.291817	-0.262033	0.793296	0.999783
ENSMUSG00000103767	0.494752	-0.348141	4.73921	-0.0734598	0.94144	NA
ENSMUSG00000101746	1.49054	-0.335122	2.70633	-0.123829	0.901451	NA
ENSMUSG00000015962	5.47207	1.17061	1.47147	0.795543	0.426298	NA
ENSMUSG00000015961	1294.48	0.359875	0.205284	1.75305	0.0795926	0.896628
ENSMUSG00000089657	0.787308	-1.33807	3.61897	-0.369736	0.711579	NA
ENSMUSG00000091476	1.8295	-1.67319	2.52764	-0.661959	0.507998	NA
ENSMUSG00000104097	1.34503	3.69749	3.39863	1.08794	0.276623	NA
ENSMUSG00000102493	16.5692	-0.265618	0.817063	-0.325089	0.745114	0.999783
ENSMUSG00000026502	344.144	0.319221	0.268839	1.1874	0.235069	0.999783
ENSMUSG00000070489	0.712642	0.639729	4.04929	0.157985	0.874468	NA
ENSMUSG00000104126	45.805	-0.558961	0.514621	-1.08616	0.277408	0.999783
ENSMUSG00000086350	4.89237	0.247886	1.46637	0.169047	0.865759	NA
ENSMUSG00000026500	1.7461	0.0765428	2.54791	0.0300414	0.976034	NA
ENSMUSG00000039630	5683.62	0.118164	0.180173	0.655837	0.511929	0.999783
ENSMUSG00000104279	8.36676	1.70181	1.16911	1.45565	0.145489	0.973369
ENSMUSG00000026495	32.3206	-0.0285669	0.642882	-0.0444357	0.964557	0.999783
ENSMUSG00000026494	50.8968	-0.965895	0.501508	-1.92598	0.0541068	0.826837
ENSMUSG00000055067	152.492	-0.0699489	0.327316	-0.213704	0.830778	0.999783
ENSMUSG00000096474	0.728338	0.637273	3.7176	0.17142	0.863893	NA
ENSMUSG00000026492	126.762	0.168636	0.343227	0.491323	0.623198	0.999783
ENSMUSG00000082395	0.224172	1.10814	4.99497	0.22185	0.82443	NA
ENSMUSG00000038949	142.817	-0.0300346	0.338375	-0.0887612	0.929272	0.999783
ENSMUSG00000038936	404.81	0.0741204	0.236622	0.313244	0.754095	0.999783
ENSMUSG00000087236	0.286275	-1.80911	4.99453	-0.362219	0.717189	NA
ENSMUSG00000026491	649.811	0.107274	0.216552	0.495374	0.620336	0.999783
ENSMUSG00000104418	1.88932	1.23582	2.3079	0.535473	0.592323	NA
ENSMUSG00000026490	392.187	-0.627084	0.261528	-2.39777	0.0164953	0.556286
ENSMUSG00000103636	0.728338	0.637273	3.7176	0.17142	0.863893	NA
ENSMUSG00000026489	100.772	0.161268	0.437186	0.368877	0.71222	0.999783
ENSMUSG00000104520	3.21151	-0.132424	1.82162	-0.0726958	0.942048	NA
ENSMUSG00000010609	325.835	0.0383907	0.263816	0.145521	0.8843	0.999783
ENSMUSG00000102923	1.45982	0.668291	2.78053	0.240346	0.810062	NA
ENSMUSG00000055676	7.13634	0.147234	1.20473	0.122213	0.90273	0.999783
ENSMUSG00000038855	468.877	-0.119349	0.231754	-0.514983	0.606565	0.999783
ENSMUSG00000104388	15.7067	1.1807	0.901424	1.30981	0.190259	0.999783
ENSMUSG00000103123	0.224172	1.10814	4.99497	0.22185	0.82443	NA
ENSMUSG00000103772	0.224172	1.10814	4.99497	0.22185	0.82443	NA
ENSMUSG00000026496	1011.89	-0.157332	0.203688	-0.772414	0.439869	0.999783
ENSMUSG00000058729	115.868	0.0663983	0.34556	0.192147	0.847627	0.999783
ENSMUSG00000026499	476.198	0.0177095	0.23465	0.0754719	0.939839	0.999783
ENSMUSG00000103649	38.0889	0.50871	0.570598	0.891538	0.37264	0.999783
ENSMUSG00000103156	3.18708	0.329516	1.76945	0.186225	0.852268	NA
ENSMUSG00000060743	1289.77	0.063671	0.223869	0.284412	0.776095	0.999783
ENSMUSG00000073485	20.3825	0.242557	0.755934	0.320871	0.748308	0.999783
ENSMUSG00000038806	402.917	-0.0270094	0.241776	-0.111712	0.911051	0.999783
ENSMUSG00000103979	0.448344	2.1121	4.89091	0.431841	0.665857	NA
ENSMUSG00000026520	686.203	0.07121	0.220431	0.323049	0.746658	0.999783
ENSMUSG00000038793	10.2446	-0.770295	1.09336	-0.704518	0.481111	0.999783
ENSMUSG00000026519	756.316	-0.0717299	0.219142	-0.327322	0.743424	0.999783
ENSMUSG00000085563	1.35986	-2.35084	2.95683	-0.795055	0.426581	NA
ENSMUSG00000038776	88.9527	0.387566	0.384179	1.00882	0.313063	0.999783
ENSMUSG00000038768	0.224172	1.10814	4.99497	0.22185	0.82443	NA
ENSMUSG00000026516	535.492	-0.0342996	0.223546	-0.153434	0.878056	0.999783
ENSMUSG00000062169	660.071	0.350101	0.216056	1.62042	0.105142	0.94072
ENSMUSG00000038733	1253.53	0.155605	0.205168	0.75843	0.448194	0.999783
ENSMUSG00000054135	15.3252	0.457562	0.857846	0.533384	0.593767	0.999783
ENSMUSG00000081214	7.04353	0.572387	1.23814	0.462296	0.643869	0.999783
ENSMUSG00000103260	5.98164	-0.114617	1.31068	-0.0874488	0.930315	NA
ENSMUSG00000026514	0.572551	-2.81366	4.77965	-0.588674	0.55608	NA
ENSMUSG00000047369	7.56271	0.309279	1.17563	0.263075	0.792492	0.999783
ENSMUSG00000004880	345.707	-0.0680092	0.259738	-0.261838	0.793446	0.999783
ENSMUSG00000056699	0.276861	-1.78479	4.99626	-0.357225	0.720923	NA
ENSMUSG00000022995	396.614	0.738214	0.292286	2.52565	0.0115484	0.479501
ENSMUSG00000103722	0.286275	-1.80911	4.99453	-0.362219	0.717189	NA
ENSMUSG00000103317	0.217891	1.08747	4.99644	0.217648	0.827703	NA
ENSMUSG00000102950	0.504166	-0.371627	4.70508	-0.0789843	0.937045	NA
ENSMUSG00000102760	0.286275	-1.80911	4.99453	-0.362219	0.717189	NA
ENSMUSG00000026511	566.428	0.334064	0.235542	1.41827	0.156111	0.98739
ENSMUSG00000091013	0.217891	1.08747	4.99644	0.217648	0.827703	NA
ENSMUSG00000038633	1409.65	0.309992	0.199451	1.55423	0.12013	0.955865
ENSMUSG00000100147	1.5999	2.21418	2.79934	0.790963	0.428966	NA
ENSMUSG00000047539	482.047	-0.0643977	0.227807	-0.282685	0.777418	0.999783
ENSMUSG00000073482	2.0725	-1.09508	2.18447	-0.501303	0.616158	NA
ENSMUSG00000026510	601.071	-0.461108	0.216776	-2.12712	0.03341	0.722277
ENSMUSG00000026509	1564.44	0.0402949	0.190232	0.21182	0.832247	0.999783
ENSMUSG00000102234	0.659953	2.67231	4.08735	0.653799	0.513241	NA
ENSMUSG00000104415	2.77886	-0.628856	2.06216	-0.304949	0.760405	NA
ENSMUSG00000038576	14.7615	-0.462831	1.00733	-0.459464	0.645901	0.999783
ENSMUSG00000102291	0.224172	1.10814	4.99497	0.22185	0.82443	NA
ENSMUSG00000079164	18.1991	-0.232206	0.78387	-0.29623	0.767054	0.999783
ENSMUSG00000104367	2.66075	-1.58135	2.04372	-0.773763	0.439071	NA
ENSMUSG00000030768	179.969	-0.0852007	0.322486	-0.2642	0.791626	0.999783
ENSMUSG00000102478	0.890407	3.10289	3.62893	0.855042	0.392528	NA
ENSMUSG00000046836	614.798	0.0297735	0.215798	0.137969	0.890265	0.999783
ENSMUSG00000042901	913.677	0.200433	0.224331	0.893471	0.371605	0.999783
ENSMUSG00000056050	902.06	0.122565	0.209139	0.586045	0.557846	0.999783
ENSMUSG00000103415	0.930533	1.22401	3.64747	0.335578	0.737189	NA
ENSMUSG00000072258	236.481	0.161711	0.27545	0.587079	0.557151	0.999783
ENSMUSG00000104212	1.94829	0.397079	2.22989	0.178071	0.858668	NA
ENSMUSG00000053461	9.9372	-0.0581716	1.02267	-0.0568822	0.954639	0.999783
ENSMUSG00000039384	120.731	0.29955	0.356557	0.840119	0.400842	0.999783
ENSMUSG00000044854	10.8402	0.178495	0.991522	0.180021	0.857136	0.999783
ENSMUSG00000104419	1.083	-1.94431	3.45563	-0.562651	0.573673	NA
ENSMUSG00000103308	11.0509	-0.350699	0.971853	-0.360856	0.718207	0.999783
ENSMUSG00000102606	1.51565	-0.350141	2.50372	-0.139849	0.88878	NA
ENSMUSG00000039377	371.167	0.245164	0.247264	0.99151	0.321437	0.999783
ENSMUSG00000102158	1.95456	0.358642	2.42715	0.147763	0.88253	NA
ENSMUSG00000026621	10.9159	1.15265	1.00798	1.14353	0.252818	0.999783
ENSMUSG00000073481	2553.26	0.447495	0.267868	1.67058	0.094805	0.92243
ENSMUSG00000039349	306.497	0.853578	0.3205	2.66327	0.00773851	0.391018
ENSMUSG00000026620	31.0692	-0.0483709	0.606727	-0.0797244	0.936456	0.999783
ENSMUSG00000104461	0.276861	-1.78479	4.99626	-0.357225	0.720923	NA
ENSMUSG00000039318	654.2	-0.147389	0.223226	-0.660267	0.509083	0.999783
ENSMUSG00000103613	0.224172	1.10814	4.99497	0.22185	0.82443	NA
ENSMUSG00000026618	892.288	-0.17116	0.206911	-0.827215	0.408115	0.999783
ENSMUSG00000065581	1.07358	-1.93125	3.21077	-0.601492	0.547512	NA
ENSMUSG00000102526	0.563136	-2.79197	4.39419	-0.635378	0.525182	NA
ENSMUSG00000026617	277.444	0.0608423	0.272816	0.223016	0.823523	0.999783
ENSMUSG00000097261	1.49995	-0.34826	2.51203	-0.138637	0.889737	NA
ENSMUSG00000026615	1655.55	-0.223964	0.194327	-1.15252	0.249109	0.999783
ENSMUSG00000039246	51.5578	0.0417848	0.502348	0.083179	0.933709	0.999783
ENSMUSG00000039239	50.3965	0.499037	0.523219	0.953782	0.340194	0.999783
ENSMUSG00000001305	456.819	0.0240616	0.228676	0.105221	0.9162	0.999783
ENSMUSG00000097784	11.8084	0.264448	0.977582	0.270513	0.786766	0.999783
ENSMUSG00000097935	1.91671	-2.9454	2.61408	-1.12674	0.259851	NA
ENSMUSG00000039224	0.448344	2.1121	4.89091	0.431841	0.665857	NA
ENSMUSG00000104424	0.224172	1.10814	4.99497	0.22185	0.82443	NA
ENSMUSG00000026611	1.37888	1.97471	2.89991	0.680954	0.4959	NA
ENSMUSG00000107163	0.728338	0.637273	3.7176	0.17142	0.863893	NA
ENSMUSG00000089730	2.17247	0.662316	2.13943	0.309576	0.756883	NA
ENSMUSG00000039210	242.91	-0.194079	0.272632	-0.711871	0.476545	0.999783
ENSMUSG00000104394	26.5484	0.436828	0.651651	0.67034	0.502641	0.999783
ENSMUSG00000104245	16.9949	-0.273394	0.832004	-0.328597	0.74246	0.999783
ENSMUSG00000026608	433.29	-0.190899	0.242327	-0.787774	0.430829	0.999783
ENSMUSG00000037624	116.555	-0.211312	0.38015	-0.555867	0.578302	0.999783
ENSMUSG00000103669	4.27568	-0.520738	1.56789	-0.332127	0.739794	NA
ENSMUSG00000102824	85.8517	-0.223848	0.39451	-0.567408	0.570437	0.999783
ENSMUSG00000026605	421.219	0.243116	0.295734	0.822077	0.411033	0.999783
ENSMUSG00000026604	460.427	0.161464	0.245933	0.656536	0.511479	0.999783
ENSMUSG00000102248	0.286275	-1.80911	4.99453	-0.362219	0.717189	NA
ENSMUSG00000097925	0.217891	1.08747	4.99644	0.217648	0.827703	NA
ENSMUSG00000104435	146.035	-0.210491	0.334471	-0.629326	0.529135	0.999783
ENSMUSG00000026603	450.673	-0.258624	0.242833	-1.06503	0.286862	0.999783
ENSMUSG00000103467	1.2325	0.211627	2.93254	0.0721652	0.94247	NA
ENSMUSG00000010175	0.217891	1.08747	4.99644	0.217648	0.827703	NA
ENSMUSG00000089872	372.666	-0.322828	0.251874	-1.2817	0.199947	0.999783
ENSMUSG00000026634	517.983	-0.168083	0.222497	-0.755438	0.449986	0.999783
ENSMUSG00000037568	99.2645	-0.0744094	0.367562	-0.20244	0.839572	0.999783
ENSMUSG00000103723	0.217891	1.08747	4.99644	0.217648	0.827703	NA
ENSMUSG00000066595	129.802	0.690061	0.364208	1.89469	0.0581337	0.838511
ENSMUSG00000026632	81.5482	-0.0269871	0.403012	-0.0669635	0.946611	0.999783
ENSMUSG00000062510	110.07	0.294521	0.371903	0.791931	0.428401	0.999783
ENSMUSG00000103576	0.217891	1.08747	4.99644	0.217648	0.827703	NA
ENSMUSG00000026630	46.6571	0.26704	0.522589	0.510994	0.609355	0.999783
ENSMUSG00000102777	0.276861	-1.78479	4.99626	-0.357225	0.720923	NA
ENSMUSG00000091017	0.217891	1.08747	4.99644	0.217648	0.827703	NA
ENSMUSG00000026628	242.959	-0.336176	0.290054	-1.15901	0.246452	0.999783
ENSMUSG00000073478	48.1323	0.0736277	0.571473	0.128838	0.897485	0.999783
ENSMUSG00000103685	7.09622	0.358243	1.21579	0.294658	0.768255	0.999783
ENSMUSG00000103174	0.504166	-0.371627	4.70508	-0.0789843	0.937045	NA
ENSMUSG00000037499	1023.36	-0.0822927	0.234208	-0.351366	0.725314	0.999783
ENSMUSG00000026627	155.449	0.0277838	0.316028	0.0879155	0.929944	0.999783
ENSMUSG00000026626	639.856	0.162217	0.217114	0.74715	0.454973	0.999783
ENSMUSG00000103114	0.217891	1.08747	4.99644	0.217648	0.827703	NA
ENSMUSG00000102246	2.66407	0.450866	1.93493	0.233013	0.815751	NA
ENSMUSG00000037474	212.389	0.685079	0.299315	2.28882	0.0220896	0.6308
ENSMUSG00000037461	599.041	-0.00724971	0.218879	-0.033122	0.973577	0.999783
ENSMUSG00000102970	0.666235	2.68473	4.07255	0.659227	0.50975	NA
ENSMUSG00000026623	433.371	0.190177	0.235907	0.806152	0.420155	0.999783
ENSMUSG00000102596	0.224172	1.10814	4.99497	0.22185	0.82443	NA
ENSMUSG00000102840	2.51456	-0.356206	1.96607	-0.181177	0.856229	NA
ENSMUSG00000026622	287.786	0.18414	0.289449	0.636174	0.524663	0.999783
ENSMUSG00000055833	4.92062	0.23402	1.44134	0.162363	0.87102	NA
ENSMUSG00000037434	99.9798	0.128396	0.375906	0.341564	0.732679	0.999783
ENSMUSG00000049353	2.67035	0.455756	1.91535	0.23795	0.81192	NA
ENSMUSG00000097416	0.946229	1.21779	3.34917	0.363608	0.716151	NA
ENSMUSG00000102915	0.286275	-1.80911	4.99453	-0.362219	0.717189	NA
ENSMUSG00000026637	99.1991	0.234215	0.372127	0.629396	0.52909	0.999783
ENSMUSG00000103653	56.3841	-0.0335785	0.474978	-0.0706948	0.943641	0.999783
ENSMUSG00000037395	149.535	-0.0878927	0.31635	-0.277834	0.78114	0.999783
ENSMUSG00000097316	17.9121	0.61767	0.796578	0.775404	0.438101	0.999783
ENSMUSG00000058248	8.33975	-0.611065	1.14334	-0.534456	0.593026	0.999783
ENSMUSG00000037375	117.987	0.191329	0.350561	0.545779	0.585218	0.999783
ENSMUSG00000047384	1.76112	-0.760311	2.74238	-0.277245	0.781592	NA
ENSMUSG00000100872	0.501033	-0.328159	4.71632	-0.0695794	0.944528	NA
ENSMUSG00000016262	401.209	-0.0370789	0.293856	-0.126181	0.899589	0.999783
ENSMUSG00000089812	15.9694	0.55072	0.824072	0.668291	0.503948	0.999783
ENSMUSG00000102162	0.276861	-1.78479	4.99626	-0.357225	0.720923	NA
ENSMUSG00000016200	0.224172	1.10814	4.99497	0.22185	0.82443	NA
ENSMUSG00000103640	0.217891	1.08747	4.99644	0.217648	0.827703	NA
ENSMUSG00000016181	275.97	0.100237	0.258758	0.387379	0.698476	0.999783
ENSMUSG00000026638	346.383	0.0758149	0.310059	0.244518	0.80683	0.999783
ENSMUSG00000079144	61.5192	0.142535	0.446456	0.319258	0.749531	0.999783
ENSMUSG00000037318	50.7956	-0.344263	0.499171	-0.689671	0.490401	0.999783
ENSMUSG00000090080	0.930533	1.22401	3.64747	0.335578	0.737189	NA
ENSMUSG00000026639	151.947	-1.02701	0.449364	-2.28547	0.0222854	0.632736
ENSMUSG00000016194	39.252	2.66178	0.637928	4.17254	3.01221e-05	0.00935417
ENSMUSG00000103089	0.217891	1.08747	4.99644	0.217648	0.827703	NA
ENSMUSG00000009633	42.1393	-0.273382	0.628373	-0.435064	0.663516	0.999783
ENSMUSG00000104348	6.43104	2.25504	1.48137	1.52226	0.127944	0.96403
ENSMUSG00000016179	3.33345	0.984717	1.77632	0.554359	0.579333	NA
ENSMUSG00000097850	2.24172	4.43456	2.85738	1.55197	0.12067	NA
ENSMUSG00000103692	0.217891	1.08747	4.99644	0.217648	0.827703	NA
ENSMUSG00000026640	48.0219	0.532551	0.539514	0.987093	0.323597	0.999783
ENSMUSG00000016494	569.547	0.870098	0.222816	3.905	9.42249e-05	0.024116
ENSMUSG00000097325	4.62179	0.441953	1.51174	0.292348	0.770021	NA
ENSMUSG00000096929	1.60618	2.22056	2.75525	0.805938	0.420279	NA
ENSMUSG00000104525	1.79564	-0.779093	2.34105	-0.332796	0.739288	NA
ENSMUSG00000103867	0.510447	-0.351662	4.68284	-0.075096	0.940138	NA
ENSMUSG00000016493	20.9994	0.65326	0.727222	0.898295	0.369028	0.999783
ENSMUSG00000104010	2.44305	0.244881	2.01295	0.121653	0.903174	NA
ENSMUSG00000103443	0.435781	2.07482	4.89366	0.423982	0.671579	NA
ENSMUSG00000016481	369.074	0.148029	0.243998	0.60668	0.544063	0.999783
ENSMUSG00000026616	1.22937	0.241294	2.75242	0.0876661	0.930142	NA
ENSMUSG00000050530	213.049	-0.00358914	0.284003	-0.0126377	0.989917	0.999783
ENSMUSG00000026643	399.568	0.214543	0.24159	0.888048	0.374515	0.999783
ENSMUSG00000049950	147.854	0.221504	0.351936	0.629387	0.529095	0.999783
ENSMUSG00000026650	0.276861	-1.78479	4.99626	-0.357225	0.720923	NA
ENSMUSG00000026648	75.7857	0.208834	0.409142	0.51042	0.609757	0.999783
ENSMUSG00000026646	48.9233	0.0378796	0.506492	0.0747881	0.940383	0.999783
ENSMUSG00000085043	0.448344	2.1121	4.89091	0.431841	0.665857	NA
ENSMUSG00000109865	459.302	0.0386461	0.236351	0.163511	0.870116	0.999783
ENSMUSG00000051396	43.6424	0.0948405	0.514525	0.184326	0.853758	0.999783
ENSMUSG00000039496	8.68585	-0.101535	1.09315	-0.0928829	0.925997	0.999783
ENSMUSG00000082580	0.286275	-1.80911	4.99453	-0.362219	0.717189	NA
ENSMUSG00000026655	1007.13	-0.154614	0.208865	-0.740257	0.459144	0.999783
ENSMUSG00000081070	8.98328	1.34387	1.13606	1.18291	0.236843	0.999783
ENSMUSG00000026657	508.717	-0.0342784	0.225104	-0.152278	0.878968	0.999783
ENSMUSG00000087355	0.217891	1.08747	4.99644	0.217648	0.827703	NA
ENSMUSG00000102494	1.45668	0.633097	2.7173	0.232988	0.815771	NA
ENSMUSG00000086874	0.858826	-3.39868	4.0391	-0.841445	0.400098	NA
ENSMUSG00000039449	362.863	-0.12787	0.246727	-0.518265	0.604273	0.999783
ENSMUSG00000083378	8.48994	-0.177438	1.10238	-0.160959	0.872126	0.999783
ENSMUSG00000048186	1.59677	2.23508	2.76081	0.809573	0.418185	NA
ENSMUSG00000026662	750.098	0.00731148	0.207834	0.0351794	0.971937	0.999783
ENSMUSG00000026664	623.311	0.0223429	0.252145	0.0886111	0.929391	0.999783
ENSMUSG00000086670	1.23879	0.223011	2.92752	0.0761772	0.939278	NA
ENSMUSG00000069188	44.9684	-0.716773	0.524545	-1.36647	0.171792	0.996421
ENSMUSG00000026668	9.01642	4.9497	1.91783	2.58088	0.00985486	0.444293
ENSMUSG00000026669	208.743	0.507791	0.316791	1.60292	0.108953	0.94305
ENSMUSG00000026672	232.25	0.00382236	0.271982	0.0140537	0.988787	0.999783
ENSMUSG00000086430	0.659953	2.67231	4.08735	0.653799	0.513241	NA
ENSMUSG00000026676	2.54928	1.81883	2.07164	0.877967	0.379962	NA
ENSMUSG00000039145	256.492	0.563899	0.312075	1.80693	0.0707729	0.874018
ENSMUSG00000082013	0.501033	-0.328159	4.71632	-0.0695794	0.944528	NA
ENSMUSG00000039128	811.982	0.0712657	0.206269	0.345498	0.72972	0.999783
ENSMUSG00000025817	348.419	0.305036	0.248609	1.22697	0.219833	0.999783
ENSMUSG00000056718	17.1009	-0.347267	0.793595	-0.437588	0.661685	0.999783
ENSMUSG00000025816	235.673	-0.0241771	0.291848	-0.0828413	0.933978	0.999783
ENSMUSG00000025815	0.839997	-3.36978	3.72407	-0.904864	0.365537	NA
ENSMUSG00000043241	414.018	-0.0183908	0.241935	-0.0760155	0.939407	0.999783
ENSMUSG00000045319	59.8652	-0.238248	0.460524	-0.517341	0.604918	0.999783
ENSMUSG00000039063	322.871	-0.174603	0.313619	-0.556735	0.577709	0.999783
ENSMUSG00000087125	0.286275	-1.80911	4.99453	-0.362219	0.717189	NA
ENSMUSG00000118578	0.217891	1.08747	4.99644	0.217648	0.827703	NA
ENSMUSG00000039046	803.135	-0.192171	0.211315	-0.909409	0.363134	0.999783
ENSMUSG00000085716	0.217891	1.08747	4.99644	0.217648	0.827703	NA
ENSMUSG00000086109	4.27655	1.04364	1.60088	0.651914	0.514457	NA
ENSMUSG00000102599	0.666235	2.68473	4.07255	0.659227	0.50975	NA
ENSMUSG00000002107	228.968	0.825859	0.305523	2.7031	0.00686954	0.379249
ENSMUSG00000082953	2.60111	-1.57174	2.19236	-0.716916	0.473426	NA
ENSMUSG00000015619	1049.86	-0.0567032	0.235099	-0.241188	0.809409	0.999783
ENSMUSG00000086618	0.653672	2.65942	4.50975	0.589705	0.555388	NA
ENSMUSG00000025783	27.6295	-0.300375	0.642536	-0.467483	0.640154	0.999783
ENSMUSG00000079602	7.71431	-0.949397	1.23548	-0.768445	0.442223	0.999783
ENSMUSG00000075534	0.224172	1.10814	4.99497	0.22185	0.82443	NA
ENSMUSG00000025782	223.35	-0.1329	0.288443	-0.46075	0.644978	0.999783
ENSMUSG00000103570	2.12291	1.44477	2.33471	0.618822	0.536033	NA
ENSMUSG00000025781	2372.95	0.225481	0.185205	1.21747	0.223427	0.999783
ENSMUSG00000077733	0.217891	1.08747	4.99644	0.217648	0.827703	NA
ENSMUSG00000037262	294.006	0.156163	0.26593	0.587232	0.557048	0.999783
ENSMUSG00000037254	191.381	2.33815	1.23246	1.89714	0.0578095	0.837908
ENSMUSG00000025780	29.3109	0.291546	0.633617	0.46013	0.645423	0.999783
ENSMUSG00000086748	43.4215	0.561303	0.551831	1.01716	0.309075	0.999783
ENSMUSG00000061186	139.656	0.0750871	0.32932	0.228006	0.819641	0.999783
ENSMUSG00000082871	1.00207	-0.312292	3.46648	-0.0900891	0.928216	NA
ENSMUSG00000085257	1.87676	1.22405	2.36493	0.517585	0.604748	NA
ENSMUSG00000026778	10.3053	0.358296	1.06813	0.335441	0.737292	0.999783
ENSMUSG00000103774	0.224172	1.10814	4.99497	0.22185	0.82443	NA
ENSMUSG00000102196	0.722057	0.618317	4.02924	0.153458	0.878037	NA
ENSMUSG00000102894	0.448344	2.1121	4.89091	0.431841	0.665857	NA
ENSMUSG00000102674	1.02089	-0.352169	3.44196	-0.102317	0.918505	NA
ENSMUSG00000086006	0.796723	-1.3576	3.88468	-0.349476	0.726732	NA
ENSMUSG00000103321	0.224172	1.10814	4.99497	0.22185	0.82443	NA
ENSMUSG00000086491	0.276861	-1.78479	4.99626	-0.357225	0.720923	NA
ENSMUSG00000082424	0.286275	-1.80911	4.99453	-0.362219	0.717189	NA
ENSMUSG00000082314	0.217891	1.08747	4.99644	0.217648	0.827703	NA
ENSMUSG00000026773	494.491	0.129817	0.251104	0.516983	0.605168	0.999783
ENSMUSG00000102329	4.9269	0.236834	1.45228	0.163078	0.870457	NA
ENSMUSG00000102376	2.83869	1.21287	2.05334	0.590681	0.554734	NA
ENSMUSG00000037197	1301.17	0.0203928	0.19622	0.103929	0.917226	0.999783
ENSMUSG00000026770	13.2579	-0.181692	0.908012	-0.200099	0.841403	0.999783
ENSMUSG00000104101	0.501033	-0.328159	4.71632	-0.0695794	0.944528	NA
ENSMUSG00000023206	200.101	0.145314	0.29641	0.490244	0.623961	0.999783
ENSMUSG00000058594	886.114	-0.186264	0.219671	-0.847923	0.396481	0.999783
ENSMUSG00000047909	660.249	-0.0611457	0.23696	-0.258043	0.796374	0.999783
ENSMUSG00000080801	0.224172	1.10814	4.99497	0.22185	0.82443	NA
ENSMUSG00000026768	57.5605	1.16093	0.480315	2.41702	0.0156481	0.544062
ENSMUSG00000086843	0.896688	3.11246	3.96648	0.784692	0.432634	NA
ENSMUSG00000026767	151.43	0.182998	0.354757	0.515841	0.605965	0.999783
ENSMUSG00000083547	0.217891	1.08747	4.99644	0.217648	0.827703	NA
ENSMUSG00000104045	0.217891	1.08747	4.99644	0.217648	0.827703	NA
ENSMUSG00000026730	175.325	-0.0562915	0.303347	-0.185568	0.852783	0.999783
ENSMUSG00000049630	0.494752	-0.348141	4.73921	-0.0734598	0.94144	NA
ENSMUSG00000104459	0.448344	2.1121	4.89091	0.431841	0.665857	NA
ENSMUSG00000103599	0.276861	-1.78479	4.99626	-0.357225	0.720923	NA
ENSMUSG00000026727	561.708	-0.0497883	0.222237	-0.224032	0.822733	0.999783
ENSMUSG00000103360	0.224172	1.10814	4.99497	0.22185	0.82443	NA
ENSMUSG00000102691	6.51966	-0.3515	1.25462	-0.280165	0.779351	0.999783
ENSMUSG00000099246	0.224172	1.10814	4.99497	0.22185	0.82443	NA
ENSMUSG00000103232	0.276861	-1.78479	4.99626	-0.357225	0.720923	NA
ENSMUSG00000086358	2.04179	-0.35224	2.58724	-0.136145	0.891706	NA
ENSMUSG00000026726	10.6161	0.587849	1.05114	0.559248	0.575992	0.999783
ENSMUSG00000026723	84.892	0.500894	0.392492	1.27619	0.201889	0.999783
ENSMUSG00000026728	27418	-0.0573173	0.212699	-0.269476	0.787563	0.999783
ENSMUSG00000003418	6.85094	1.30385	1.26553	1.03028	0.302879	0.999783
ENSMUSG00000063275	55.0085	0.349346	0.497891	0.701651	0.482897	0.999783
ENSMUSG00000102553	3.07457	-0.828779	1.79803	-0.460937	0.644844	NA
ENSMUSG00000103926	0.286275	-1.80911	4.99453	-0.362219	0.717189	NA
ENSMUSG00000086657	3.25546	-0.126005	1.76865	-0.0712432	0.943204	NA
ENSMUSG00000026718	278.455	0.472194	0.277537	1.70138	0.0888721	0.915043
ENSMUSG00000103901	4.37876	0.285879	1.62432	0.175999	0.860295	NA
ENSMUSG00000061531	0.435781	2.07482	4.89366	0.423982	0.671579	NA
ENSMUSG00000083545	4.60295	0.43333	1.50171	0.288558	0.77292	NA
ENSMUSG00000026712	778.38	0.299746	0.255923	1.17123	0.241504	0.999783
ENSMUSG00000103475	1.06417	-1.91762	3.21978	-0.595577	0.551458	NA
ENSMUSG00000036949	0.276861	-1.78479	4.99626	-0.357225	0.720923	NA
ENSMUSG00000057914	0.787308	-1.33807	3.61897	-0.369736	0.711579	NA
ENSMUSG00000070271	3.18708	0.329516	1.76945	0.186225	0.852268	NA
ENSMUSG00000026707	55.5626	0.163228	0.471156	0.34644	0.729012	0.999783
ENSMUSG00000017418	170.117	0.310857	0.304034	1.02244	0.306571	0.999783
ENSMUSG00000102258	0.276861	-1.78479	4.99626	-0.357225	0.720923	NA
ENSMUSG00000083860	0.504166	-0.371627	4.70508	-0.0789843	0.937045	NA
ENSMUSG00000026748	227.481	-0.254734	0.327481	-0.777858	0.436653	0.999783
ENSMUSG00000053702	1.67143	0.97622	2.42272	0.402944	0.68699	NA
ENSMUSG00000054057	141.373	0.0371348	0.347899	0.10674	0.914995	0.999783
ENSMUSG00000054074	35.8265	0.43907	0.582329	0.75399	0.450855	0.999783
ENSMUSG00000086340	1.55036	3.90361	2.9061	1.34325	0.179192	NA
ENSMUSG00000026743	354.457	0.109521	0.249296	0.439322	0.660429	0.999783
ENSMUSG00000099050	0.563136	-2.79197	4.39419	-0.635378	0.525182	NA
ENSMUSG00000092814	1.23565	0.252822	2.95758	0.085483	0.931877	NA
ENSMUSG00000081619	0.217891	1.08747	4.99644	0.217648	0.827703	NA
ENSMUSG00000026740	323.25	0.0995206	0.250651	0.397048	0.691332	0.999783
ENSMUSG00000082520	1.34103	-2.33014	2.96897	-0.784832	0.432552	NA
ENSMUSG00000086882	0.448344	2.1121	4.89091	0.431841	0.665857	NA
ENSMUSG00000051154	743.276	0.381907	0.216012	1.76799	0.0770629	0.892401
ENSMUSG00000026739	392.498	0.571597	0.331693	1.72327	0.0848397	0.906646
ENSMUSG00000037708	14.2474	-0.199331	0.863488	-0.230844	0.817436	0.999783
ENSMUSG00000092353	2.24085	-0.0173414	2.1093	-0.00822142	0.99344	NA
ENSMUSG00000081139	0.666235	2.68473	4.07255	0.659227	0.50975	NA
ENSMUSG00000026737	238.986	0.0732919	0.273833	0.267652	0.788967	0.999783
ENSMUSG00000026736	2.00413	-0.311413	2.60324	-0.119625	0.90478	NA
ENSMUSG00000083281	0.286275	-1.80911	4.99453	-0.362219	0.717189	NA
ENSMUSG00000037683	32.2033	0.0994663	0.640805	0.155221	0.876647	0.999783
ENSMUSG00000087674	0.501033	-0.328159	4.71632	-0.0695794	0.944528	NA
ENSMUSG00000023094	149.191	0.116418	0.317867	0.366247	0.714181	0.999783
ENSMUSG00000109733	0.501033	-0.328159	4.71632	-0.0695794	0.944528	NA
ENSMUSG00000043415	86.3351	0.179982	0.401836	0.447899	0.654226	0.999783
ENSMUSG00000036617	299.181	-0.647405	0.266786	-2.42669	0.0152374	0.536948
ENSMUSG00000081128	14.0318	-0.720422	0.8716	-0.826551	0.408492	0.999783
ENSMUSG00000086418	1.63044	-2.67979	2.75251	-0.973579	0.330266	NA
ENSMUSG00000036591	1112.28	-0.293064	0.201147	-1.45696	0.145127	0.971815
ENSMUSG00000085206	0.276861	-1.78479	4.99626	-0.357225	0.720923	NA
ENSMUSG00000075514	103.015	-0.551208	0.371288	-1.48458	0.137655	0.970157
ENSMUSG00000026679	41.6379	0.70985	0.538167	1.31902	0.187164	0.999783
ENSMUSG00000048550	144.371	0.00383681	0.317811	0.0120726	0.990368	0.999783
ENSMUSG00000084071	0.572551	-2.81366	4.77965	-0.588674	0.55608	NA
ENSMUSG00000045967	3.79976	-0.553589	1.64266	-0.337008	0.736111	NA
ENSMUSG00000081467	10.5656	-0.352746	0.996206	-0.354089	0.723272	0.999783
ENSMUSG00000082516	31.7282	-0.865304	0.613717	-1.40994	0.158557	0.988319
ENSMUSG00000083863	4.28577	-0.184484	1.64622	-0.112065	0.910772	NA
ENSMUSG00000083563	7.33852	0.217723	1.27315	0.171011	0.864215	0.999783
ENSMUSG00000026787	0.728338	0.637273	3.7176	0.17142	0.863893	NA
ENSMUSG00000026786	437.376	-0.0365986	0.236157	-0.154976	0.87684	0.999783
ENSMUSG00000069136	2.27137	-4.80273	2.5811	-1.86073	0.0627823	NA
ENSMUSG00000026784	101.756	0.431813	0.375623	1.14959	0.250312	0.999783
ENSMUSG00000081861	0.276861	-1.78479	4.99626	-0.357225	0.720923	NA
ENSMUSG00000058835	607.43	0.325391	0.248355	1.31018	0.190134	0.999783
ENSMUSG00000083650	0.224172	1.10814	4.99497	0.22185	0.82443	NA
ENSMUSG00000026781	275.482	0.186964	0.284792	0.656494	0.511507	0.999783
ENSMUSG00000026779	93.3798	0.387649	0.391245	0.990808	0.32178	0.999783
ENSMUSG00000026775	701.311	0.769907	0.248687	3.09588	0.00196229	0.178805
ENSMUSG00000081648	5.34471	1.89437	1.48857	1.27261	0.203155	NA
ENSMUSG00000084098	8.44351	-0.0153461	1.12172	-0.0136808	0.989085	0.999783
ENSMUSG00000102704	17.3985	0.649292	0.798402	0.81324	0.416081	0.999783
ENSMUSG00000026771	176.722	0.444035	0.310665	1.4293	0.152917	0.9846
ENSMUSG00000083373	3.04384	-0.369052	1.99789	-0.184721	0.853448	NA
ENSMUSG00000026986	5.17552	0.0820489	1.44752	0.0566825	0.954798	NA
ENSMUSG00000083116	1.06417	-1.91762	3.21978	-0.595577	0.551458	NA
ENSMUSG00000044103	8.26613	0.98509	1.34597	0.731881	0.464241	0.999783
ENSMUSG00000026981	178.024	0.0722264	0.371268	0.19454	0.845753	0.999783
ENSMUSG00000026979	245.855	-0.105483	0.268506	-0.392849	0.694431	0.999783
ENSMUSG00000026976	0.448344	2.1121	4.89091	0.431841	0.665857	NA
ENSMUSG00000084241	0.501033	-0.328159	4.71632	-0.0695794	0.944528	NA
ENSMUSG00000004113	1.56834	-1.34924	2.49451	-0.540884	0.588588	NA
ENSMUSG00000036893	780.011	-0.172177	0.211101	-0.815613	0.414722	0.999783
ENSMUSG00000103162	0.276861	-1.78479	4.99626	-0.357225	0.720923	NA
ENSMUSG00000102875	3.0777	-0.840518	1.79753	-0.467595	0.640074	NA
ENSMUSG00000026972	1540.58	-0.347484	0.259642	-1.33832	0.180793	0.999783
ENSMUSG00000026974	475.157	0.0707612	0.227102	0.311584	0.755357	0.999783
ENSMUSG00000026975	291.14	-0.0795597	0.275733	-0.288539	0.772934	0.999783
ENSMUSG00000036850	297.899	0.0152915	0.273272	0.0559571	0.955376	0.999783
ENSMUSG00000036833	552.873	0.136845	0.245356	0.557741	0.577021	0.999783
ENSMUSG00000084383	1.01461	-0.368361	3.20207	-0.115038	0.908415	NA
ENSMUSG00000083796	1.02089	-0.352169	3.44196	-0.102317	0.918505	NA
ENSMUSG00000065798	0.224172	1.10814	4.99497	0.22185	0.82443	NA
ENSMUSG00000006476	1949.24	-0.583125	0.274335	-2.1256	0.0335369	0.722277
ENSMUSG00000092845	0.286275	-1.80911	4.99453	-0.362219	0.717189	NA
ENSMUSG00000099320	2.74416	-3.50656	2.33673	-1.50063	0.133451	NA
ENSMUSG00000036813	22.4231	1.98777	1.01072	1.96668	0.0492197	0.799469
ENSMUSG00000036805	6.29932	-0.228569	1.36351	-0.167633	0.866872	0.999783
ENSMUSG00000118563	18.4048	-0.680233	0.805217	-0.844782	0.398232	0.999783
ENSMUSG00000087028	163.882	-0.510936	0.373522	-1.36788	0.171348	0.996421
ENSMUSG00000078202	67.5815	-0.497126	0.456956	-1.08791	0.276636	0.999783
ENSMUSG00000059555	686.31	-0.0287291	0.241076	-0.11917	0.905141	0.999783
ENSMUSG00000013465	980.974	-0.0187457	0.20497	-0.0914561	0.92713	0.999783
ENSMUSG00000064919	0.936814	1.23603	3.36091	0.367767	0.713047	NA
ENSMUSG00000036770	0.217891	1.08747	4.99644	0.217648	0.827703	NA
ENSMUSG00000026969	1.49682	-0.324061	2.70253	-0.11991	0.904554	NA
ENSMUSG00000036752	2167.38	0.0164714	0.200976	0.081957	0.934681	0.999783
ENSMUSG00000006469	0.217891	1.08747	4.99644	0.217648	0.827703	NA
ENSMUSG00000036731	0.563136	-2.79197	4.39419	-0.635378	0.525182	NA
ENSMUSG00000044628	2.01981	-0.35865	2.19733	-0.163221	0.870345	NA
ENSMUSG00000006471	97.8055	-0.376522	0.386172	-0.975012	0.329554	0.999783
ENSMUSG00000078201	32.2452	-0.0345052	0.592291	-0.0582571	0.953544	0.999783
ENSMUSG00000048707	101.518	-0.109348	0.362876	-0.301337	0.763158	0.999783
ENSMUSG00000026966	457.353	0.234686	0.229936	1.02066	0.307417	0.999783
ENSMUSG00000026965	1529.66	-0.138468	0.199661	-0.693514	0.487987	0.999783
ENSMUSG00000026961	5.42567	1.51626	1.53345	0.988788	0.322767	NA
ENSMUSG00000026959	0.504166	-0.371627	4.70508	-0.0789843	0.937045	NA
ENSMUSG00000085830	0.224172	1.10814	4.99497	0.22185	0.82443	NA
ENSMUSG00000036646	809.434	-0.119711	0.209682	-0.570915	0.568057	0.999783
ENSMUSG00000088171	0.224172	1.10814	4.99497	0.22185	0.82443	NA
ENSMUSG00000026958	209.382	0.318736	0.303822	1.04909	0.294137	0.999783
ENSMUSG00000026956	1336.98	0.00853994	0.224102	0.0381073	0.969602	0.999783
ENSMUSG00000026955	119.315	0.240943	0.373876	0.644445	0.519287	0.999783
ENSMUSG00000015085	6.10986	0.483479	1.34916	0.358356	0.720077	NA
ENSMUSG00000015094	1111.3	-0.111797	0.216028	-0.517511	0.604799	0.999783
ENSMUSG00000036587	4.18687	1.97644	1.69255	1.16773	0.242916	NA
ENSMUSG00000026944	440.125	-0.467541	0.258858	-1.80617	0.0708915	0.874759
ENSMUSG00000047617	145.396	-0.168124	0.320838	-0.524014	0.600269	0.999783
ENSMUSG00000015093	9.74146	0.388312	1.03517	0.375119	0.707572	0.999783
ENSMUSG00000015090	0.998918	-0.365643	3.22025	-0.113545	0.909599	NA
ENSMUSG00000026943	0.510447	-0.351662	4.68284	-0.075096	0.940138	NA
ENSMUSG00000015083	18.0484	0.652329	0.785551	0.83041	0.406307	0.999783
ENSMUSG00000015095	717.028	-0.222493	0.229358	-0.970067	0.332013	0.999783
ENSMUSG00000026942	412.633	0.0511832	0.254362	0.201222	0.840525	0.999783
ENSMUSG00000015092	1194.45	0.124504	0.198882	0.62602	0.531302	0.999783
ENSMUSG00000026941	130.667	-0.23467	0.334016	-0.702572	0.482322	0.999783
ENSMUSG00000036504	55.009	-0.0539822	0.507656	-0.106336	0.915316	0.999783
ENSMUSG00000029419	34.6376	-0.316534	0.605139	-0.523076	0.600921	0.999783
ENSMUSG00000015087	914.633	0.0540949	0.218748	0.247293	0.804681	0.999783
ENSMUSG00000052403	2.2377	-0.0398358	2.09844	-0.0189836	0.984854	NA
ENSMUSG00000026940	4.45954	-1.22276	1.60108	-0.763709	0.445041	NA
ENSMUSG00000026939	137.368	0.117042	0.328421	0.356377	0.721558	0.999783
ENSMUSG00000026938	168.021	1.39469	0.341835	4.08	4.50364e-05	0.0134263
ENSMUSG00000049086	30.6113	-0.253413	0.621167	-0.407963	0.683301	0.999783
ENSMUSG00000059625	2.72076	3.10542	2.32143	1.33772	0.180989	NA
ENSMUSG00000058740	3.55761	1.09717	1.73564	0.632144	0.527293	NA
ENSMUSG00000026933	470.876	-0.189343	0.23654	-0.800467	0.42344	0.999783
ENSMUSG00000082357	0.435781	2.07482	4.89366	0.423982	0.671579	NA
ENSMUSG00000036352	402.501	-0.0411226	0.237417	-0.173208	0.862488	0.999783
ENSMUSG00000026932	154.255	-0.0785929	0.32354	-0.242915	0.808071	0.999783
ENSMUSG00000087679	498.997	0.0377752	0.237654	0.15895	0.873708	0.999783
ENSMUSG00000087595	8.45854	-0.176344	1.11158	-0.158643	0.87395	0.999783
ENSMUSG00000036327	225.983	0.121173	0.301223	0.402268	0.687487	0.999783
ENSMUSG00000026930	265.649	0.0822674	0.296749	0.277229	0.781604	0.999783
ENSMUSG00000075467	320.537	0.0463946	0.248555	0.186657	0.85193	0.999783
ENSMUSG00000026928	199.974	-0.0194418	0.29301	-0.066352	0.947098	0.999783
ENSMUSG00000086779	3.06829	-0.834943	1.79887	-0.464148	0.642542	NA
ENSMUSG00000036281	371.493	-0.351122	0.256166	-1.37068	0.170475	0.995936
ENSMUSG00000085767	12.9128	0.367781	0.914943	0.401972	0.687705	0.999783
ENSMUSG00000026927	494.119	0.177258	0.235518	0.752632	0.451671	0.999783
ENSMUSG00000026926	529.703	-0.241166	0.244765	-0.985299	0.324477	0.999783
ENSMUSG00000026925	203.518	-0.177286	0.295537	-0.599879	0.548587	0.999783
ENSMUSG00000026924	776.34	-0.292628	0.215507	-1.35786	0.174508	0.996421
ENSMUSG00000086714	3.11241	0.818845	1.79718	0.455628	0.648657	NA
ENSMUSG00000026923	217.773	-0.320304	0.343542	-0.932359	0.351151	0.999783
ENSMUSG00000026921	695.017	0.436632	0.215233	2.02865	0.0424939	0.764993
ENSMUSG00000026922	367.154	0.0328275	0.24927	0.131695	0.895226	0.999783
ENSMUSG00000036186	156.935	0.111332	0.342698	0.324869	0.74528	0.999783
ENSMUSG00000097052	0.787308	-1.33807	3.61897	-0.369736	0.711579	NA
ENSMUSG00000077192	13.372	-0.517225	0.911089	-0.5677	0.570239	0.999783
ENSMUSG00000086775	2.49887	-0.355151	2.00667	-0.176985	0.85952	NA
ENSMUSG00000026919	0.777894	-1.31633	3.91919	-0.335868	0.73697	NA
ENSMUSG00000082951	0.217891	1.08747	4.99644	0.217648	0.827703	NA
ENSMUSG00000036160	327.848	-0.224497	0.256111	-0.876559	0.380726	0.999783
ENSMUSG00000015776	714.933	-0.146646	0.214288	-0.68434	0.49376	0.999783
ENSMUSG00000062647	10379.7	-0.117032	0.189323	-0.61816	0.53647	0.999783
ENSMUSG00000065258	2.65466	0.459811	1.96217	0.234339	0.814722	NA
ENSMUSG00000015790	308.681	-0.0434275	0.25374	-0.17115	0.864106	0.999783
ENSMUSG00000014873	261.486	-0.0919013	0.263743	-0.34845	0.727502	0.999783
ENSMUSG00000014867	2081.68	0.196483	0.194367	1.01089	0.312069	0.999783
ENSMUSG00000049897	4.79867	-0.514178	1.48975	-0.345143	0.729987	NA
ENSMUSG00000052406	479.309	0.0792872	0.242778	0.326582	0.743984	0.999783
ENSMUSG00000014852	0.217891	1.08747	4.99644	0.217648	0.827703	NA
ENSMUSG00000015488	390.06	-0.147013	0.238665	-0.61598	0.537907	0.999783
ENSMUSG00000036067	84.7325	0.294887	0.39469	0.747135	0.454982	0.999783
[truncated: 23,993 more rows]

## Sheet: WF1 Exp2
	baseMean	log2FoldChange	lfcSE	stat	pvalue	padj
ENSMUSG00000051951	0.951435	-3.68233	2.66529	-1.38159	0.167099	NA
ENSMUSG00000102331	0.0894764	-0.993852	4.08046	-0.243564	0.807569	NA
ENSMUSG00000025900	0.200141	1.89698	4.03164	0.470524	0.637981	NA
ENSMUSG00000025902	156.732	0.154682	0.244682	0.632174	0.527273	0.997241
ENSMUSG00000104238	0.512945	-2.51453	3.69167	-0.681136	0.495785	NA
ENSMUSG00000102269	1.70684	-1.0716	1.67477	-0.63985	0.52227	NA
ENSMUSG00000096126	0.103043	-0.993852	4.08046	-0.243564	0.807569	NA
ENSMUSG00000104328	1.91811	1.32886	1.54221	0.861658	0.388876	NA
ENSMUSG00000098104	8.07985	0.296645	0.853374	0.347615	0.728129	NA
ENSMUSG00000102175	2.7326	0.465802	1.28119	0.363569	0.71618	NA
ENSMUSG00000088000	0.728847	-0.0321138	4.08046	-0.00787014	0.993721	NA
ENSMUSG00000103265	1.53079	-1.76136	1.93632	-0.909641	0.363012	NA
ENSMUSG00000103922	4.82443	-1.20122	0.961741	-1.24901	0.211662	NA
ENSMUSG00000033845	843.333	0.152789	0.140366	1.08851	0.276371	0.979082
ENSMUSG00000102275	27.309	1.02041	0.489129	2.08617	0.0369631	NA
ENSMUSG00000025903	748.064	-0.108039	0.112579	-0.959673	0.33722	0.988037
ENSMUSG00000033813	1763.51	-0.110024	0.088682	-1.24066	0.214732	0.956299
ENSMUSG00000062588	25.5662	1.04487	0.492221	2.12276	0.0337737	NA
ENSMUSG00000103280	8.14267	-0.155342	1.06104	-0.146406	0.883601	NA
ENSMUSG00000002459	70.6345	0.333251	0.477515	0.697886	0.485249	NA
ENSMUSG00000091305	0.284105	2.41227	3.99454	0.603891	0.545916	NA
ENSMUSG00000102653	0.516735	1.4853	3.14824	0.471786	0.637079	NA
ENSMUSG00000085623	2.23713	0.369826	1.299	0.284701	0.775873	NA
ENSMUSG00000091665	0.178953	-1.79309	4.04682	-0.443086	0.657703	NA
ENSMUSG00000033793	1095.06	-0.0919252	0.0937345	-0.980698	0.326742	0.988037
ENSMUSG00000033774	0.107252	-0.0320929	4.08046	-0.00786503	0.993725	NA
ENSMUSG00000025907	1680.78	-0.00894743	0.103055	-0.0868221	0.930813	0.998877
ENSMUSG00000090031	93.4382	0.180273	0.24908	0.723755	0.469216	NA
ENSMUSG00000087247	0.295562	-2.49898	3.99322	-0.625806	0.531442	NA
ENSMUSG00000103355	0.206085	-1.97005	4.03091	-0.488735	0.625029	NA
ENSMUSG00000103845	0.454309	0.774715	3.88869	0.199223	0.842089	NA
ENSMUSG00000033740	7.27535	0.820093	1.32577	0.618578	0.536194	NA
ENSMUSG00000103329	0.0876728	-0.0320929	4.08046	-0.00786503	0.993725	NA
ENSMUSG00000102135	1.15022	1.7316	2.15149	0.804839	0.420913	NA
ENSMUSG00000051285	1340.36	-0.0135868	0.119148	-0.114033	0.909212	0.998877
ENSMUSG00000098201	0.796515	1.61304	3.84051	0.420006	0.674481	NA
ENSMUSG00000103509	50.5155	0.349974	0.401291	0.872119	0.383143	NA
ENSMUSG00000048538	0.499327	1.92565	3.66562	0.525326	0.599356	NA
ENSMUSG00000097797	11.7356	-0.0262974	0.725599	-0.0362424	0.971089	NA
ENSMUSG00000086235	0.612246	0.881991	3.14839	0.280141	0.77937	NA
ENSMUSG00000084353	7.59302	-0.332417	0.75876	-0.438106	0.661309	NA
ENSMUSG00000103411	1.34032	-1.98334	2.20629	-0.898946	0.368681	NA
ENSMUSG00000061024	1223.9	-0.298983	0.119932	-2.49293	0.0126694	0.563074
ENSMUSG00000025911	116.744	0.165795	0.246513	0.672561	0.501227	0.997241
ENSMUSG00000079671	56.1943	0.601226	0.282325	2.12955	0.0332087	NA
ENSMUSG00000081441	1.91307	-0.918265	1.58277	-0.580164	0.561804	NA
ENSMUSG00000067879	4.325	0.254598	0.951618	0.267542	0.789052	NA
ENSMUSG00000025912	147.34	0.274572	0.185066	1.48364	0.137903	0.916301
ENSMUSG00000045210	1308.99	-0.162684	0.123067	-1.32192	0.186195	0.943928
ENSMUSG00000097893	7.32335	0.36865	0.814984	0.45234	0.651024	NA
ENSMUSG00000025915	614.018	-0.183017	0.150484	-1.21619	0.223914	0.961605
ENSMUSG00000046334	3.95026	-0.92751	1.10291	-0.840963	0.400369	NA
ENSMUSG00000088916	0.466766	0.133595	3.82236	0.0349509	0.972119	NA
ENSMUSG00000046101	2.90149	0.311836	1.27711	0.244173	0.807097	NA
ENSMUSG00000098234	667.872	0.0432272	0.193753	0.223105	0.823454	0.997744
ENSMUSG00000093178	0.979208	2.89864	3.21589	0.90135	0.367403	NA
ENSMUSG00000099032	6.20947	0.449166	0.870091	0.516229	0.605695	NA
ENSMUSG00000104025	0.178953	-1.79309	4.04682	-0.443086	0.657703	NA
ENSMUSG00000025916	4.01436	-0.0351912	1.03282	-0.034073	0.972819	NA
ENSMUSG00000087199	0.206975	0.929688	4.08046	0.227839	0.819771	NA
ENSMUSG00000095780	0.292912	-0.0320769	4.08046	-0.00786111	0.993728	NA
ENSMUSG00000025917	1712.6	0.0541241	0.103848	0.521187	0.602237	0.997241
ENSMUSG00000056763	577.797	0.0719463	0.126149	0.570327	0.568456	0.997241
ENSMUSG00000102356	0.398233	-0.0922755	3.98598	-0.02315	0.981531	NA
ENSMUSG00000067851	3118.25	-0.180298	0.11845	-1.52215	0.12797	0.91393
ENSMUSG00000088153	2.56067	3.3462	1.63952	2.04096	0.0412544	NA
ENSMUSG00000102556	1.37613	-0.858734	2.43388	-0.352826	0.724219	NA
ENSMUSG00000042501	0.359956	2.75911	3.97595	0.693951	0.487713	NA
ENSMUSG00000100212	0.350979	0.929679	4.08046	0.227837	0.819773	NA
ENSMUSG00000048960	208.851	0.241808	0.235996	1.02463	0.305538	0.984056
ENSMUSG00000057715	0.10007	0.929694	4.08046	0.227841	0.81977	NA
ENSMUSG00000016918	720.029	-0.124623	0.577012	-0.215981	0.829003	0.997744
ENSMUSG00000025938	131.536	-0.0808484	0.34694	-0.233033	0.815736	0.997744
ENSMUSG00000042414	0.178953	-1.79309	4.04682	-0.443086	0.657703	NA
ENSMUSG00000005886	1567.38	-0.230374	0.146514	-1.57237	0.115864	0.90776
ENSMUSG00000103506	2.97449	0.863853	1.12405	0.768517	0.44218	NA
ENSMUSG00000103495	2.42517	0.541008	1.74796	0.309509	0.756934	NA
ENSMUSG00000099183	0.392289	2.8746	3.97067	0.723959	0.469091	NA
ENSMUSG00000102639	0.178953	-1.79309	4.04682	-0.443086	0.657703	NA
ENSMUSG00000104170	1.36185	-3.43601	2.53942	-1.35307	0.176034	NA
ENSMUSG00000087782	0.627987	-2.88349	3.45928	-0.833552	0.404533	NA
ENSMUSG00000103085	10.2559	-1.59542	0.687572	-2.32037	0.0203207	NA
ENSMUSG00000102664	7.1858	-0.259569	0.984406	-0.263681	0.792026	NA
ENSMUSG00000101476	0.515684	-1.53109	3.70376	-0.413389	0.679322	NA
ENSMUSG00000101171	0.200141	1.89698	4.03164	0.470524	0.637981	NA
ENSMUSG00000025935	3458.51	-0.0549658	0.106219	-0.517475	0.604825	0.997241
ENSMUSG00000025937	627.51	-0.0132952	0.132614	-0.100255	0.920142	0.998877
ENSMUSG00000102982	11.1027	1.17077	0.67202	1.74216	0.0814809	NA
ENSMUSG00000067813	0.297396	1.7353	4.04619	0.428874	0.668015	NA
ENSMUSG00000102166	0.0980465	-0.993852	4.08046	-0.243564	0.807569	NA
ENSMUSG00000025932	590.433	-0.344017	0.155546	-2.21168	0.026989	0.699449
ENSMUSG00000095853	0.501114	-1.53113	3.73698	-0.409725	0.682008	NA
ENSMUSG00000102588	1.76252	-0.0635868	2.24084	-0.0283763	0.977362	NA
ENSMUSG00000054493	0.0894764	-0.993852	4.08046	-0.243564	0.807569	NA
ENSMUSG00000025930	15.0651	-0.432164	0.748737	-0.57719	0.563811	NA
ENSMUSG00000103492	0.0894764	-0.993852	4.08046	-0.243564	0.807569	NA
ENSMUSG00000081201	0.698468	2.52671	3.94863	0.639894	0.522241	NA
ENSMUSG00000082193	4.25726	-0.349911	1.12733	-0.310391	0.756264	NA
ENSMUSG00000032769	0.632932	-2.40664	3.95432	-0.60861	0.542783	NA
ENSMUSG00000073737	0.396501	-0.831674	4.00033	-0.207901	0.835306	NA
ENSMUSG00000092083	1.54258	-0.716327	3.10546	-0.230667	0.817574	NA
ENSMUSG00000025925	546.504	0.236187	0.147001	1.60671	0.108119	0.898861
ENSMUSG00000104379	1.75563	0.21047	1.63279	0.128902	0.897435	NA
ENSMUSG00000032719	9.76737	-0.527792	0.710013	-0.743355	0.457267	NA
ENSMUSG00000067795	3.49522	-0.25142	1.2573	-0.199968	0.841505	NA
ENSMUSG00000043716	30127.2	0.0870368	0.126649	0.687229	0.491938	0.997241
ENSMUSG00000025921	3014.28	-0.543239	0.161367	-3.36648	0.000761344	0.206206
ENSMUSG00000100868	1.47246	-1.3914	2.05619	-0.676687	0.498605	NA
ENSMUSG00000025920	913.881	-0.0635936	0.117501	-0.541219	0.588356	0.997241
ENSMUSG00000089982	1.8568	-0.856385	1.57833	-0.54259	0.587412	NA
ENSMUSG00000025939	922.408	-0.232585	0.122537	-1.89808	0.0576854	0.820103
ENSMUSG00000102457	3.23461	-1.7058	1.75773	-0.970455	0.33182	NA
ENSMUSG00000079658	1173.1	0.0612972	0.144878	0.423094	0.672226	0.997241
ENSMUSG00000097744	0.209435	0.929688	4.08046	0.227839	0.819771	NA
ENSMUSG00000100959	0.276999	-2.41429	3.99839	-0.603815	0.545967	NA
ENSMUSG00000025940	621.449	-0.0524742	0.133889	-0.391923	0.695115	0.997241
ENSMUSG00000025779	86.5491	0.309685	0.241701	1.28128	0.200096	NA
ENSMUSG00000091020	1.39156	-1.08384	1.69756	-0.638473	0.523166	NA
ENSMUSG00000042686	63.4982	0.162298	0.547845	0.296248	0.767041	NA
ENSMUSG00000025777	0.861242	2.65994	2.71401	0.980079	0.327047	NA
ENSMUSG00000101589	3.56348	0.325639	1.2166	0.267663	0.788959	NA
ENSMUSG00000067780	96.1011	-0.499969	0.833286	-0.599996	0.548509	NA
ENSMUSG00000100053	0.886459	-0.0321094	3.79601	-0.00845872	0.993251	NA
ENSMUSG00000085125	0.178953	-1.79309	4.04682	-0.443086	0.657703	NA
ENSMUSG00000025776	9.51045	-0.290203	0.846855	-0.342683	0.731837	NA
ENSMUSG00000101685	0.10007	0.929694	4.08046	0.227841	0.81977	NA
ENSMUSG00000100720	0.467969	-0.99387	3.85528	-0.257794	0.796566	NA
ENSMUSG00000025927	2.7249	-3.92528	2.79853	-1.40262	0.160729	NA
ENSMUSG00000100204	0.620565	-2.90823	3.53794	-0.822013	0.41107	NA
ENSMUSG00000043760	0.763967	1.61076	3.29741	0.488494	0.6252	NA
ENSMUSG00000099906	8.46741	-1.42371	1.43146	-0.994588	0.319937	NA
ENSMUSG00000041872	2.72855	0.535001	1.30329	0.410502	0.681438	NA
ENSMUSG00000041859	2680.84	0.271367	0.178474	1.52048	0.12839	0.913945
ENSMUSG00000097934	0.67773	-0.00942225	2.44669	-0.00385102	0.996927	NA
ENSMUSG00000025931	185.018	-0.617401	0.249032	-2.47921	0.0131675	0.570919
ENSMUSG00000100929	0.320714	-0.032104	4.08046	-0.00786775	0.993723	NA
ENSMUSG00000041809	18.4125	0.602966	0.466954	1.29128	0.196608	NA
ENSMUSG00000041779	1458.18	0.0137803	0.12146	0.113456	0.909669	0.998877
ENSMUSG00000100819	0.577557	-3.46831	3.95116	-0.877797	0.380054	NA
ENSMUSG00000025933	66.6465	-0.00850505	0.291109	-0.0292161	0.976692	NA
ENSMUSG00000102633	0.192148	1.84568	4.03609	0.457296	0.647459	NA
ENSMUSG00000025934	4.1333	-0.967268	1.06652	-0.906938	0.36444	NA
ENSMUSG00000096375	1.97486	-0.305388	1.51699	-0.201312	0.840455	NA
ENSMUSG00000085507	0.268429	-2.37349	4.00098	-0.593227	0.553029	NA
ENSMUSG00000028033	40.9904	-0.309676	0.491976	-0.629454	0.529052	NA
ENSMUSG00000082935	71.889	-0.215375	0.288789	-0.745788	0.455796	NA
ENSMUSG00000041670	0.696896	2.81839	3.44154	0.818934	0.412824	NA
ENSMUSG00000073730	0.421825	0.929677	4.08046	0.227836	0.819773	NA
ENSMUSG00000102766	0.0980465	-0.993852	4.08046	-0.243564	0.807569	NA
ENSMUSG00000097970	6.36672	0.634352	1.0331	0.614027	0.539197	NA
ENSMUSG00000100775	0.587949	-0.633531	2.67484	-0.236848	0.812774	NA
ENSMUSG00000026158	480.466	-0.265795	0.135337	-1.96395	0.0495357	0.814878
ENSMUSG00000026156	25.5112	0.3068	0.499299	0.614461	0.538911	NA
ENSMUSG00000026155	485.187	-0.124014	0.153834	-0.806155	0.420154	0.996275
ENSMUSG00000026154	122.736	0.194877	0.246681	0.789995	0.429531	0.997241
ENSMUSG00000026153	586.644	-0.00994213	0.143912	-0.069085	0.944922	0.998877
ENSMUSG00000102398	0.307045	1.89698	4.03164	0.470522	0.637982	NA
ENSMUSG00000026147	17.0547	0.442644	0.95285	0.464548	0.642255	NA
ENSMUSG00000026141	2.56999	1.89568	1.51392	1.25217	0.210508	NA
ENSMUSG00000099997	1.14368	-1.44851	2.72582	-0.531402	0.59514	NA
ENSMUSG00000100131	18.89	-0.575901	0.458038	-1.25732	0.208638	NA
ENSMUSG00000067736	1.50421	0.0507486	1.67146	0.030362	0.975778	NA
ENSMUSG00000101939	75.0216	-0.106587	0.392381	-0.271643	0.785897	NA
ENSMUSG00000101111	52.4658	0.193721	0.372652	0.519845	0.603172	NA
ENSMUSG00000100862	81.2267	-0.181125	0.307243	-0.589518	0.555514	NA
ENSMUSG00000102070	60.3866	-0.204973	0.419417	-0.48871	0.625047	NA
ENSMUSG00000101249	34.9181	0.0819137	0.440309	0.186037	0.852416	NA
ENSMUSG00000073725	867.634	0.111983	0.130923	0.855337	0.392365	0.99383
ENSMUSG00000033569	0.190715	-0.993858	4.08046	-0.243565	0.807567	NA
ENSMUSG00000073722	0.196093	-1.90747	4.03632	-0.472577	0.636515	NA
ENSMUSG00000086240	22.8836	0.885998	0.450795	1.96541	0.0493667	NA
ENSMUSG00000081557	0.184035	1.79128	4.04097	0.443279	0.657564	NA
ENSMUSG00000099492	41.6482	0.48116	0.41568	1.15753	0.247058	NA
ENSMUSG00000100261	2.93205	0.136136	1.22631	0.111013	0.911606	NA
ENSMUSG00000048874	2921.94	-0.0861099	0.0895365	-0.96173	0.336185	0.988037
ENSMUSG00000103783	4.54493	-0.0567902	0.88678	-0.0640409	0.948938	NA
ENSMUSG00000104315	17.5966	-0.242845	0.51318	-0.473217	0.636059	NA
ENSMUSG00000026064	16.6703	0.226389	0.670904	0.337438	0.735787	NA
ENSMUSG00000117310	2.82706	-0.507734	1.67031	-0.303975	0.761147	NA
ENSMUSG00000086727	0.096074	0.929694	4.08046	0.227841	0.81977	NA
ENSMUSG00000094215	0.0879607	0.929694	4.08046	0.227841	0.81977	NA
ENSMUSG00000070960	27.0637	-0.0114348	0.464231	-0.0246316	0.980349	NA
ENSMUSG00000026058	0.0894764	-0.993852	4.08046	-0.243564	0.807569	NA
ENSMUSG00000100481	2.23133	-0.37456	1.55334	-0.241132	0.809453	NA
ENSMUSG00000100318	0.0876728	-0.0320929	4.08046	-0.00786503	0.993725	NA
ENSMUSG00000101612	0.0879607	0.929694	4.08046	0.227841	0.81977	NA
ENSMUSG00000026134	408.231	0.321437	0.213673	1.50434	0.132493	0.915327
ENSMUSG00000101682	0.374462	-0.0320821	4.08046	-0.00786238	0.993727	NA
ENSMUSG00000102714	1.29335	-2.47535	2.3545	-1.05133	0.293109	NA
ENSMUSG00000102093	0.777462	0.477232	2.61818	0.182276	0.855366	NA
ENSMUSG00000103746	4.71471	0.926083	1.02423	0.904176	0.365902	NA
ENSMUSG00000004768	533.638	-0.19734	0.117395	-1.681	0.0927637	0.877501
ENSMUSG00000042215	572.585	-0.273832	0.137461	-1.99207	0.0463629	0.793892
ENSMUSG00000103072	1.31878	-0.249169	1.97615	-0.126088	0.899662	NA
ENSMUSG00000042197	1806.52	-0.135372	0.113517	-1.19253	0.233053	0.966109
ENSMUSG00000081402	4.29454	2.4408	1.19163	2.04829	0.0405317	NA
ENSMUSG00000042182	84.7943	-0.153669	0.272317	-0.564303	0.572548	NA
ENSMUSG00000104416	0.0879607	0.929694	4.08046	0.227841	0.81977	NA
ENSMUSG00000026131	8158.05	0.0430455	0.125282	0.34359	0.731155	0.997241
ENSMUSG00000103596	0.828773	-0.0320788	2.66033	-0.0120582	0.990379	NA
ENSMUSG00000103364	24.3446	0.578915	0.7366	0.785928	0.431909	NA
ENSMUSG00000096992	20.3865	0.30329	0.620241	0.488988	0.62485	NA
ENSMUSG00000103001	2.15183	1.57532	1.8647	0.844813	0.398215	NA
ENSMUSG00000101462	4.388	-0.445166	0.976059	-0.456085	0.648329	NA
ENSMUSG00000102336	14.3904	0.656458	0.677812	0.968495	0.332797	NA
ENSMUSG00000042111	471.282	0.0983137	0.125054	0.786171	0.431767	0.997241
ENSMUSG00000026127	1115.45	-0.0559271	0.126294	-0.442833	0.657887	0.997241
ENSMUSG00000026126	126.139	0.0848289	0.274688	0.308819	0.757459	0.997241
ENSMUSG00000100280	27.0195	0.216096	0.418044	0.516921	0.605212	NA
ENSMUSG00000101223	11.7529	-0.40542	0.864089	-0.469188	0.638935	NA
ENSMUSG00000026125	0.498544	-1.45636	3.17038	-0.459364	0.645973	NA
ENSMUSG00000026124	0.27142	0.929683	4.08046	0.227838	0.819772	NA
ENSMUSG00000037509	54.3793	-0.0420894	0.311338	-0.135189	0.892462	NA
ENSMUSG00000104002	8.00747	0.430565	0.744364	0.578433	0.562972	NA
ENSMUSG00000037503	6631.49	-0.129448	0.108312	-1.19513	0.232035	0.965337
ENSMUSG00000104358	18.2615	-0.287415	0.526408	-0.545993	0.585071	NA
ENSMUSG00000026123	2201.46	-0.0233183	0.132013	-0.176636	0.859794	0.997744
ENSMUSG00000103548	1.00931	-4.10888	2.91044	-1.41178	0.158016	NA
ENSMUSG00000103760	0.121475	-0.0320929	4.08046	-0.00786503	0.993725	NA
ENSMUSG00000102531	0.192148	1.84568	4.03609	0.457296	0.647459	NA
ENSMUSG00000103096	2.2097	-0.833372	1.39789	-0.596166	0.551065	NA
ENSMUSG00000102279	18.8345	-0.397907	0.492004	-0.808749	0.41866	NA
ENSMUSG00000103708	0.569911	-2.37597	3.61998	-0.65635	0.511599	NA
ENSMUSG00000102434	1.55025	0.569987	1.93889	0.293976	0.768777	NA
ENSMUSG00000045216	2729.14	-0.42912	0.159974	-2.68243	0.0073089	0.482274
ENSMUSG00000102202	44.8901	-0.289821	0.329774	-0.878848	0.379483	NA
ENSMUSG00000037470	7041.48	-0.0380927	0.120191	-0.316935	0.751293	0.997241
ENSMUSG00000098752	0.288222	2.43149	3.9934	0.608878	0.542606	NA
ENSMUSG00000047180	825.476	-0.0845142	0.151394	-0.558239	0.576681	0.997241
ENSMUSG00000037447	1756.78	0.0299298	0.0925225	0.323487	0.746326	0.997241
ENSMUSG00000102762	4.7131	-0.0271073	0.883551	-0.03068	0.975525	NA
ENSMUSG00000010453	3405.81	-0.00541506	0.0946014	-0.0572408	0.954353	0.998877
ENSMUSG00000037432	249.787	-0.0573961	0.198362	-0.28935	0.772313	0.997744
ENSMUSG00000001143	1087.32	0.0726786	0.156712	0.463773	0.642811	0.997241
ENSMUSG00000037408	1406.54	-0.137703	0.215795	-0.638119	0.523396	0.997241
ENSMUSG00000104316	6.8573	-0.658892	0.79598	-0.827774	0.407798	NA
ENSMUSG00000001138	1021.3	-0.0200582	0.124155	-0.161558	0.871654	0.997964
ENSMUSG00000067653	26.1619	0.223502	0.376816	0.593134	0.553092	NA
ENSMUSG00000079610	199.721	0.0329176	0.21766	0.151234	0.879791	0.997964
ENSMUSG00000026121	5430.44	-0.208613	0.111833	-1.8654	0.0621257	0.825874
ENSMUSG00000087589	132.886	-0.0861104	0.25017	-0.344208	0.73069	0.997241
ENSMUSG00000046337	30.7514	0.125936	0.506625	0.248579	0.803687	NA
ENSMUSG00000089906	0.263594	1.7353	4.04619	0.428874	0.668015	NA
ENSMUSG00000061518	1698.65	0.0980839	0.157938	0.621029	0.534581	0.997241
ENSMUSG00000037351	3299.54	-0.061525	0.0750241	-0.82007	0.412176	0.996275
ENSMUSG00000102416	0.89652	1.86907	2.27314	0.822239	0.410941	NA
ENSMUSG00000026117	52.2714	-0.00257456	0.462365	-0.00556824	0.995557	NA
ENSMUSG00000097291	0.435468	-1.88361	3.92871	-0.479447	0.631621	NA
ENSMUSG00000026116	2543.37	0.0557101	0.111985	0.497479	0.618851	0.997241
ENSMUSG00000103016	0.763209	2.66738	2.67103	0.998633	0.317972	NA
ENSMUSG00000102930	3.32292	-0.457867	1.44514	-0.316831	0.751371	NA
ENSMUSG00000103159	5.6896	0.310077	0.940149	0.329817	0.741538	NA
ENSMUSG00000050122	2.44827	-0.909512	1.73638	-0.523798	0.600419	NA
ENSMUSG00000026113	638.319	-0.172036	0.0968958	-1.77547	0.0758199	0.849041
ENSMUSG00000086064	0.196144	1.8715	4.03383	0.463951	0.642682	NA
ENSMUSG00000102879	0.4539	-0.99387	4.08046	-0.243568	0.807565	NA
ENSMUSG00000026112	2331.48	-0.0667537	0.0952221	-0.701032	0.483283	0.997241
ENSMUSG00000026111	907.252	0.000709821	0.146931	0.00483099	0.996145	0.99988
ENSMUSG00000026110	1608.68	-0.0519704	0.14225	-0.365347	0.714853	0.997241
ENSMUSG00000103948	4.05573	0.15706	0.995646	0.157747	0.874656	NA
ENSMUSG00000087233	1.25113	0.40998	2.34005	0.175201	0.860922	NA
ENSMUSG00000026090	47.028	0.618021	0.355193	1.73996	0.0818668	NA
ENSMUSG00000089767	0.900989	1.13244	3.30646	0.342495	0.731978	NA
ENSMUSG00000060771	103.937	0.140263	0.232794	0.60252	0.546828	NA
ENSMUSG00000097268	0.509498	0.929682	3.78487	0.245631	0.805968	NA
ENSMUSG00000037216	114.264	0.0372441	0.191042	0.194952	0.845431	0.997744
ENSMUSG00000026088	637.8	-0.193061	0.136071	-1.41882	0.155951	0.933261
ENSMUSG00000026087	1172.96	-0.00213747	0.135938	-0.0157238	0.987455	0.998877
ENSMUSG00000058407	1762.43	-0.0350828	0.105683	-0.331963	0.739917	0.997241
ENSMUSG00000026083	3517.89	-0.00208666	0.0958865	-0.0217618	0.982638	0.998877
ENSMUSG00000026082	395.429	0.00483146	0.176883	0.0273144	0.978209	0.998877
ENSMUSG00000103804	7.48883	0.150507	1.03841	0.14494	0.884758	NA
ENSMUSG00000037138	41.4597	0.355448	0.69021	0.514985	0.606563	NA
ENSMUSG00000085391	0.320714	-0.032104	4.08046	-0.00786775	0.993723	NA
ENSMUSG00000087131	0.10007	0.929694	4.08046	0.227841	0.81977	NA
ENSMUSG00000048814	1.2822	-0.0803298	1.78631	-0.0449697	0.964131	NA
ENSMUSG00000026080	54.8523	0.618109	0.307858	2.00778	0.044667	NA
ENSMUSG00000103647	0.206085	-1.97005	4.03091	-0.488735	0.625029	NA
ENSMUSG00000026078	1155.65	-0.0496529	0.104839	-0.47361	0.635778	0.997241
ENSMUSG00000103046	48.6408	0.734338	0.360325	2.03798	0.0415515	NA
ENSMUSG00000103182	0.759967	-0.480167	2.84696	-0.16866	0.866064	NA
ENSMUSG00000026077	30.3346	0.0384527	0.563989	0.0681798	0.945642	NA
ENSMUSG00000073702	7861.65	0.236574	0.174273	1.35749	0.174625	0.940274
ENSMUSG00000003134	536.193	-0.141165	0.15022	-0.939721	0.347361	0.988037
ENSMUSG00000102607	0.175921	1.73531	4.04619	0.428875	0.668014	NA
ENSMUSG00000003135	958.753	-0.0158426	0.121363	-0.130539	0.89614	0.997964
ENSMUSG00000085894	79.9116	0.620235	0.221491	2.80027	0.00510598	NA
ENSMUSG00000077704	22.8828	-0.0333602	0.500027	-0.0667168	0.946807	NA
ENSMUSG00000048234	1745.05	0.0181327	0.125426	0.144569	0.885051	0.997964
ENSMUSG00000064936	2.5225	-0.779394	1.41821	-0.549561	0.582621	NA
ENSMUSG00000102471	0.263882	2.31603	4.00053	0.578931	0.562636	NA
ENSMUSG00000050967	39.5467	0.0562738	0.339506	0.165752	0.868352	NA
ENSMUSG00000097083	1.50941	-2.21917	1.80196	-1.23153	0.218125	NA
ENSMUSG00000057173	15.8291	0.0704978	0.645621	0.109194	0.913049	NA
ENSMUSG00000091937	0.309883	0.929681	4.08046	0.227838	0.819772	NA
ENSMUSG00000101634	0.707092	3.12295	3.33329	0.936897	0.348812	NA
ENSMUSG00000026074	12301	-0.0582819	0.124147	-0.469457	0.638743	0.997241
ENSMUSG00000102985	0.316852	-0.993864	4.08046	-0.243567	0.807566	NA
ENSMUSG00000026073	315.95	-0.075069	0.289002	-0.259752	0.795055	0.997744
ENSMUSG00000097899	6.08755	-0.917054	0.923078	-0.993473	0.320479	NA
ENSMUSG00000102975	14.6844	-1.0009	0.613087	-1.63256	0.102561	NA
ENSMUSG00000026072	2261.17	0.308551	0.143478	2.15052	0.0315143	0.73181
ENSMUSG00000103560	0.552923	1.46725	3.14315	0.46681	0.640636	NA
ENSMUSG00000070942	316.972	0.180951	0.220564	0.8204	0.411988	0.996275
ENSMUSG00000103230	4.01659	0.52803	0.960076	0.549988	0.582328	NA
ENSMUSG00000026069	163.106	-0.270388	0.820255	-0.329639	0.741673	0.997241
ENSMUSG00000026070	41.1243	-0.656505	0.525106	-1.25023	0.211215	NA
ENSMUSG00000026068	541.17	-0.00553765	0.475472	-0.0116466	0.990708	0.999422
ENSMUSG00000026065	13.9347	0.548625	0.652739	0.840497	0.40063	NA
ENSMUSG00000026062	42.1093	-0.816996	0.549716	-1.48622	0.137222	NA
ENSMUSG00000103270	1.3486	2.80974	2.14378	1.31065	0.189977	NA
ENSMUSG00000041945	27.5536	0.419493	0.42855	0.978867	0.327646	NA
ENSMUSG00000079588	91.4242	-0.535797	0.404939	-1.32315	0.185784	NA
ENSMUSG00000045515	1.09648	3.39365	3.11254	1.09031	0.275575	NA
ENSMUSG00000060679	1042.8	0.183421	0.14799	1.23941	0.215192	0.956299
ENSMUSG00000077448	1.1512	-1.35218	1.97756	-0.68376	0.494127	NA
ENSMUSG00000041907	2.52092	-2.2758	1.63908	-1.38847	0.164995	NA
ENSMUSG00000070939	843.87	-0.0428709	0.129047	-0.33221	0.739731	0.997241
ENSMUSG00000041878	2.69478	0.381445	1.33453	0.285827	0.77501	NA
ENSMUSG00000010290	675.178	0.0205695	0.0974494	0.211078	0.832826	0.997744
ENSMUSG00000008136	2151.71	-0.070826	0.108089	-0.655259	0.512301	0.997241
ENSMUSG00000094497	262.438	0.327023	0.184224	1.77513	0.0758762	0.849041
ENSMUSG00000099576	4.29455	0.457622	0.915326	0.499956	0.617106	NA
ENSMUSG00000099694	0.175346	-0.0320981	4.08046	-0.00786631	0.993724	NA
ENSMUSG00000066877	3255.54	-0.00775384	0.20905	-0.0370909	0.970413	0.998877
ENSMUSG00000103422	3.71074	0.583419	1.45695	0.400439	0.688833	NA
ENSMUSG00000103945	64.2636	-0.177557	0.377522	-0.470323	0.638124	NA
ENSMUSG00000026051	85.9005	0.207249	0.526938	0.393308	0.694092	NA
ENSMUSG00000100764	1.95343	-0.0312084	1.95716	-0.0159457	0.987278	NA
ENSMUSG00000100635	1.10615	1.04516	2.39884	0.435695	0.663058	NA
ENSMUSG00000100480	5.77531	-1.55379	0.858158	-1.81061	0.0702007	NA
ENSMUSG00000057363	1713.51	0.119894	0.0903529	1.32695	0.184524	0.943621
ENSMUSG00000090243	1.96408	-0.0320782	2.20415	-0.0145535	0.988388	NA
ENSMUSG00000100701	3.57794	1.22265	1.16533	1.04919	0.294089	NA
ENSMUSG00000101395	0.0876728	-0.0320929	4.08046	-0.00786503	0.993725	NA
ENSMUSG00000041763	2482.3	0.0320451	0.0856386	0.37419	0.708263	0.997241
ENSMUSG00000047343	5.21664	0.0350992	0.937916	0.0374226	0.970148	NA
ENSMUSG00000091844	7.60833	-1.00527	0.847991	-1.18548	0.235829	NA
ENSMUSG00000026049	112.127	-0.144075	0.30845	-0.467094	0.640433	0.997241
ENSMUSG00000026047	567.68	0.0657147	0.144247	0.45557	0.648699	0.997241
ENSMUSG00000041684	548.883	-0.354581	0.116967	-3.03147	0.00243366	0.322624
ENSMUSG00000026048	452.268	0.0167	0.132331	0.126199	0.899575	0.998178
ENSMUSG00000089703	0.0980465	-0.993852	4.08046	-0.243564	0.807569	NA
ENSMUSG00000101567	2.15793	-0.636628	1.51585	-0.419979	0.6745	NA
ENSMUSG00000056870	36.6023	-0.353409	0.478068	-0.739243	0.459759	NA
ENSMUSG00000102319	0.268429	-2.37349	4.00098	-0.593227	0.553029	NA
ENSMUSG00000103071	0.0894764	-0.993852	4.08046	-0.243564	0.807569	NA
ENSMUSG00000026043	34373.9	0.506967	0.519188	0.976462	0.328835	0.988037
ENSMUSG00000026042	7949.72	0.161731	0.559299	0.289167	0.772453	0.997744
ENSMUSG00000104476	3.8826	-0.0767149	1.21748	-0.063011	0.949758	NA
ENSMUSG00000095121	0.351843	2.72878	3.9774	0.68607	0.492669	NA
ENSMUSG00000100843	10.8265	0.32398	0.952046	0.340298	0.733632	NA
ENSMUSG00000025995	1171.32	-0.143988	0.0971489	-1.48214	0.138303	0.916336
ENSMUSG00000084817	72.52	0.153006	0.366883	0.417043	0.676647	NA
ENSMUSG00000025993	343.453	0.326834	0.203193	1.60849	0.107727	0.898861
ENSMUSG00000041144	4.16007	1.25756	1.34478	0.935142	0.349715	NA
ENSMUSG00000101337	3.56029	1.23701	1.05881	1.1683	0.242687	NA
ENSMUSG00000025986	1202.34	0.217427	0.167558	1.29762	0.194418	0.953247
ENSMUSG00000100213	41.4467	-0.0489953	0.344682	-0.142146	0.886964	NA
ENSMUSG00000081185	0.206085	-1.97005	4.03091	-0.488735	0.625029	NA
ENSMUSG00000100033	1.00056	-0.0838323	2.49523	-0.0335971	0.973198	NA
ENSMUSG00000100816	1.81605	-0.346885	1.52839	-0.226962	0.820453	NA
ENSMUSG00000026109	6.05194	-0.273023	1.00413	-0.271899	0.785699	NA
ENSMUSG00000101799	0.627073	-0.0554839	3.10385	-0.0178758	0.985738	NA
ENSMUSG00000045954	847.311	0.175506	0.244355	0.718243	0.472608	0.997241
ENSMUSG00000101702	0.50577	2.84697	3.97189	0.716778	0.473511	NA
ENSMUSG00000026107	2187.9	0.214405	0.158423	1.35337	0.175937	0.940274
ENSMUSG00000099413	3.88238	2.18107	1.10131	1.98043	0.0476551	NA
ENSMUSG00000101741	0.528416	0.775889	3.749	0.206959	0.836042	NA
ENSMUSG00000018417	2080.44	-0.12905	0.12611	-1.02332	0.306158	0.984056
ENSMUSG00000101724	0.56864	0.143674	3.90896	0.036755	0.97068	NA
ENSMUSG00000100313	1.5291	-2.20195	1.91274	-1.1512	0.249649	NA
ENSMUSG00000062939	11.0446	0.408251	0.612852	0.666149	0.505316	NA
ENSMUSG00000101628	0.708615	0.90138	2.73961	0.329018	0.742142	NA
ENSMUSG00000078291	0.106905	-0.0320929	4.08046	-0.00786503	0.993725	NA
ENSMUSG00000109599	2.77856	0.109565	1.08541	0.100944	0.919595	NA
ENSMUSG00000026104	1220.33	-0.290127	0.593947	-0.488472	0.625215	0.997241
ENSMUSG00000099569	5.97759	-0.170537	0.988725	-0.172482	0.863059	NA
ENSMUSG00000026103	3791.5	-0.0413011	0.0905908	-0.455908	0.648456	0.997241
ENSMUSG00000002881	2142.05	0.00944128	0.106714	0.088473	0.929501	0.998877
ENSMUSG00000097833	3.634	0.379397	1.18278	0.320768	0.748386	NA
ENSMUSG00000101501	2.56665	0.74847	1.44655	0.517419	0.604864	NA
ENSMUSG00000100120	2.94849	0.0819443	1.37614	0.0595465	0.952517	NA
ENSMUSG00000099878	0.309128	-2.55852	3.98976	-0.641272	0.521346	NA
ENSMUSG00000100007	0.652351	0.835479	2.76108	0.302592	0.762201	NA
ENSMUSG00000043015	248.667	0.422611	0.19374	2.18133	0.0291592	0.718447
ENSMUSG00000103630	2.5098	1.65535	1.52293	1.08695	0.277058	NA
ENSMUSG00000041439	720.829	-0.612574	0.118104	-5.18674	2.14009e-07	0.00244591
ENSMUSG00000100302	2.2142	-0.524292	1.70014	-0.308381	0.757792	NA
ENSMUSG00000100230	0.356102	-2.3735	4.00098	-0.593228	0.553028	NA
ENSMUSG00000026102	521.67	-0.219531	0.162021	-1.35496	0.175432	0.940274
ENSMUSG00000041426	336.888	0.102708	0.162022	0.633915	0.526136	0.997241
ENSMUSG00000089802	0.194577	-0.0320986	4.08046	-0.00786642	0.993724	NA
ENSMUSG00000043629	4.52914	0.0497485	1.11209	0.0447343	0.964319	NA
ENSMUSG00000026100	3.05481	1.15669	1.22213	0.94646	0.343914	NA
ENSMUSG00000060715	0.0980465	-0.993852	4.08046	-0.243564	0.807569	NA
ENSMUSG00000026098	137.742	0.0744876	0.214104	0.347904	0.727912	0.997241
ENSMUSG00000100763	1.28452	0.423188	1.82129	0.232356	0.816261	NA
ENSMUSG00000026097	261.582	0.0439254	0.1967	0.223311	0.823293	0.997744
ENSMUSG00000026096	135.924	0.036669	0.202576	0.181013	0.856357	0.997744
ENSMUSG00000099913	8.42207	0.21708	0.784705	0.276639	0.782057	NA
ENSMUSG00000101838	3.84047	1.2432	1.05476	1.17866	0.238534	NA
ENSMUSG00000026095	67.1911	0.0589546	0.357199	0.165047	0.868907	NA
ENSMUSG00000096141	1.49266	-0.597184	1.95749	-0.305076	0.760308	NA
ENSMUSG00000026094	1392.82	0.222775	0.138425	1.60935	0.107541	0.898861
ENSMUSG00000042807	49.8165	0.690707	0.32215	2.14406	0.0320284	NA
ENSMUSG00000025983	9.79498	0.637451	0.644093	0.989688	0.322326	NA
ENSMUSG00000041303	882.064	0.168354	0.136756	1.23105	0.218302	0.957265
ENSMUSG00000109809	0.652646	2.43147	3.9934	0.608874	0.542608	NA
ENSMUSG00000073678	273.196	-0.138832	0.169415	-0.819476	0.412515	0.996275
ENSMUSG00000104136	1.12827	-1.92196	2.49581	-0.770076	0.441255	NA
ENSMUSG00000101130	0.121475	-0.0320929	4.08046	-0.00786503	0.993725	NA
ENSMUSG00000052331	555.322	-0.168717	0.134385	-1.25547	0.209307	0.953247
ENSMUSG00000101674	0.496635	1.73529	4.04619	0.428871	0.668017	NA
ENSMUSG00000102503	2.08052	3.85249	1.72658	2.23129	0.0256621	NA
ENSMUSG00000089245	0.200141	1.89698	4.03164	0.470524	0.637981	NA
ENSMUSG00000102642	2.80288	0.486829	1.20562	0.403799	0.686361	NA
ENSMUSG00000025982	10336.8	0.078719	0.0681015	1.15591	0.247719	0.975668
ENSMUSG00000103030	1.54838	0.220774	1.81281	0.121785	0.903069	NA
ENSMUSG00000025981	315.535	-0.248124	0.245059	-1.01251	0.311295	0.985117
ENSMUSG00000101122	11.1127	-0.561572	0.696015	-0.806839	0.419759	NA
ENSMUSG00000025980	9382.07	0.078073	0.0958703	0.814361	0.415438	0.996275
ENSMUSG00000073676	1894.14	0.136022	0.188062	0.723285	0.469505	0.997241
ENSMUSG00000089670	7.61879	0.960823	0.857947	1.11991	0.262753	NA
ENSMUSG00000025979	1453.08	-0.12572	0.0888682	-1.41468	0.157164	0.93456
ENSMUSG00000061863	1.80135	-1.5906	2.31518	-0.687031	0.492063	NA
ENSMUSG00000025978	132.263	-0.0361147	0.318322	-0.113453	0.909671	0.998877
ENSMUSG00000097649	9.27751	0.925594	0.968965	0.95524	0.339457	NA
ENSMUSG00000046994	151.477	-0.249944	0.252074	-0.991549	0.321418	0.988037
ENSMUSG00000025977	0.288101	2.43052	3.99345	0.608625	0.542773	NA
ENSMUSG00000100215	2.4188	1.08424	1.86475	0.58144	0.560944	NA
ENSMUSG00000038349	160.341	-0.2748	0.275297	-0.998194	0.318185	0.988037
ENSMUSG00000102145	4.60175	-0.104705	1.38027	-0.0758586	0.939532	NA
ENSMUSG00000102831	0.505599	-0.032077	2.9164	-0.0109988	0.991224	NA
ENSMUSG00000038331	340.932	-0.304311	0.165417	-1.83966	0.0658185	0.825874
ENSMUSG00000087022	36.0053	-0.0371989	0.416817	-0.089245	0.928887	NA
ENSMUSG00000104310	0.213809	-0.0320994	4.08046	-0.00786662	0.993723	NA
ENSMUSG00000094128	0.242949	-0.0320999	4.08046	-0.00786675	0.993723	NA
ENSMUSG00000101429	1.01464	2.31718	3.79159	0.611137	0.541109	NA
ENSMUSG00000097519	10.6826	0.885032	0.649679	1.36226	0.173116	NA
ENSMUSG00000038323	114.776	-0.035364	0.3085	-0.114632	0.908737	0.998877
ENSMUSG00000048495	165.52	0.165181	0.207609	0.795635	0.426244	0.997241
ENSMUSG00000025971	221.867	0.0779489	0.191005	0.4081	0.683201	0.997241
ENSMUSG00000038305	118.181	0.396929	0.296213	1.34001	0.180241	0.940882
ENSMUSG00000091283	0.0876728	-0.0320929	4.08046	-0.00786503	0.993725	NA
ENSMUSG00000054770	508.245	0.196734	0.172215	1.14237	0.2533	0.977035
ENSMUSG00000026039	255.337	0.175548	0.225369	0.778937	0.436017	0.997241
ENSMUSG00000063558	1625.27	0.154823	0.22566	0.686091	0.492656	0.997241
ENSMUSG00000064294	3.38428	0.713836	1.32962	0.536873	0.591355	NA
ENSMUSG00000038242	0.930527	-0.677621	2.58363	-0.262275	0.79311	NA
ENSMUSG00000089822	0.0894764	-0.993852	4.08046	-0.243564	0.807569	NA
ENSMUSG00000079554	2.45737	1.01265	1.45825	0.69443	0.487413	NA
ENSMUSG00000103839	78.1642	0.494408	0.376425	1.31343	0.189038	NA
ENSMUSG00000051223	7893.72	-0.0675763	0.0784111	-0.861822	0.388786	0.99383
ENSMUSG00000026034	3028.59	0.308691	0.126502	2.4402	0.0146791	0.599168
ENSMUSG00000026035	340.368	0.053702	0.188431	0.284996	0.775647	0.997744
ENSMUSG00000026036	736.209	-0.0455651	0.126595	-0.359929	0.7189	0.997241
ENSMUSG00000026037	520.657	-0.312479	0.186143	-1.67871	0.093209	0.877581
ENSMUSG00000094245	8.78699	0.0747426	0.75149	0.0994592	0.920774	NA
ENSMUSG00000085054	34.5984	0.659661	0.408228	1.61591	0.106113	NA
ENSMUSG00000038174	336.97	-0.361028	0.203922	-1.77042	0.0766573	0.849041
ENSMUSG00000026032	566.927	-0.0201562	0.13841	-0.145627	0.884216	0.997964
ENSMUSG00000059647	4.38695	-0.433026	1.22155	-0.354488	0.722973	NA
ENSMUSG00000047528	3.62111	-1.91009	1.25919	-1.51692	0.129286	NA
ENSMUSG00000102059	82.7399	0.213858	0.327034	0.653932	0.513156	NA
ENSMUSG00000026031	3087.58	-0.0912936	0.111086	-0.821831	0.411173	0.996275
ENSMUSG00000100236	0.0879607	0.929694	4.08046	0.227841	0.81977	NA
ENSMUSG00000026029	1975.51	0.0453526	0.0924048	0.490804	0.623565	0.997241
ENSMUSG00000102719	18.9212	0.524578	0.524128	1.00086	0.316894	NA
ENSMUSG00000099719	6.58436	1.61264	0.859123	1.87707	0.0605081	NA
ENSMUSG00000026028	1351.8	-0.133538	0.124774	-1.07024	0.284511	0.980864
ENSMUSG00000026027	331.574	-0.134977	0.156846	-0.860574	0.389473	0.99383
ENSMUSG00000038079	592.814	0.0769402	0.111907	0.68754	0.491743	0.997241
ENSMUSG00000097573	5.384	1.66191	1.23995	1.3403	0.180147	NA
ENSMUSG00000079550	8.61971	0.205422	0.680248	0.301981	0.762666	NA
ENSMUSG00000101586	9.27517	0.336181	0.754472	0.445584	0.655898	NA
ENSMUSG00000026024	674.534	-0.0247501	0.185128	-0.133692	0.893646	0.997964
ENSMUSG00000026023	3.19829	1.25392	2.08422	0.601626	0.547423	NA
ENSMUSG00000104502	0.612675	2.84657	3.55203	0.801394	0.422903	NA
ENSMUSG00000041075	1844.39	-0.0571941	0.139322	-0.410518	0.681426	0.997241
ENSMUSG00000097819	20.4411	0.583336	0.507103	1.15033	0.250008	NA
ENSMUSG00000047361	2.09636	-1.79507	1.8157	-0.988641	0.322839	NA
ENSMUSG00000026021	1627.33	0.14955	0.105912	1.41202	0.157944	0.937251
ENSMUSG00000103821	27.7814	0.383481	0.435856	0.879833	0.37895	NA
ENSMUSG00000101400	6.12107	-0.121087	0.861958	-0.140479	0.888281	NA
ENSMUSG00000026020	3713.33	-0.0275346	0.135317	-0.203482	0.838758	0.997744
ENSMUSG00000077345	5.83233	-1.14485	0.78606	-1.45644	0.145272	NA
ENSMUSG00000089512	1.11154	0.729355	1.9496	0.374106	0.708326	NA
ENSMUSG00000089093	0.596721	-2.28436	2.93476	-0.778381	0.436345	NA
ENSMUSG00000067336	3628.2	-0.145939	0.156196	-0.934329	0.350134	0.988037
ENSMUSG00000104052	5.48181	-1.38505	0.950233	-1.45759	0.144953	NA
ENSMUSG00000103131	0.402178	-2.94232	3.97053	-0.74104	0.458669	NA
ENSMUSG00000041040	1208.8	-0.0862839	0.122527	-0.704201	0.481308	0.997241
ENSMUSG00000103696	7.50479	0.216392	0.751463	0.287962	0.773376	NA
ENSMUSG00000100901	2.19685	-0.0340027	1.58679	-0.0214287	0.982904	NA
ENSMUSG00000026018	9.0556	0.629859	0.757994	0.830954	0.406	NA
ENSMUSG00000026019	978.94	-0.113274	0.0987	-1.14766	0.251109	0.976149
ENSMUSG00000026017	252.108	0.0922234	0.167338	0.551121	0.581551	0.997241
ENSMUSG00000082609	1.95725	-0.753828	1.5235	-0.494801	0.620741	NA
ENSMUSG00000073664	1149.24	-0.0963469	0.147852	-0.651643	0.514631	0.997241
ENSMUSG00000049439	967.769	0.0192274	0.0932666	0.206156	0.836669	0.997744
ENSMUSG00000103822	3.22942	0.460578	1.31397	0.350523	0.725946	NA
ENSMUSG00000026782	883.763	0.0253532	0.106739	0.237526	0.812249	0.997744
ENSMUSG00000026014	1262.31	0.115275	0.145139	0.794238	0.427057	0.997241
ENSMUSG00000081562	0.779867	2.32567	2.89663	0.802886	0.422041	NA
ENSMUSG00000084400	0.635125	-2.14672	3.49905	-0.613514	0.539536	NA
ENSMUSG00000082160	0.0876728	-0.0320929	4.08046	-0.00786503	0.993725	NA
ENSMUSG00000103215	0.364424	-0.0321054	4.08046	-0.00786808	0.993722	NA
ENSMUSG00000101188	1752.56	0.106065	0.0891682	1.1895	0.234244	0.966827
ENSMUSG00000026012	23.377	0.395284	0.523971	0.754401	0.450608	NA
ENSMUSG00000085965	0.096074	0.929694	4.08046	0.227841	0.81977	NA
ENSMUSG00000104069	0.10007	0.929694	4.08046	0.227841	0.81977	NA
ENSMUSG00000083355	0.107252	-0.0320929	4.08046	-0.00786503	0.993725	NA
ENSMUSG00000102549	0.175346	-0.0320981	4.08046	-0.00786631	0.993724	NA
ENSMUSG00000026011	28.0203	0.0256463	0.548665	0.0467431	0.962718	NA
ENSMUSG00000081382	2.31915	0.356015	1.62132	0.219584	0.826195	NA
ENSMUSG00000026009	32.134	-0.517244	0.494205	-1.04662	0.295275	NA
ENSMUSG00000102561	0.535424	1.89513	3.72246	0.509106	0.610678	NA
ENSMUSG00000052062	43.6704	-0.194058	0.396202	-0.489795	0.624279	NA
ENSMUSG00000104402	0.107252	-0.0320929	4.08046	-0.00786503	0.993725	NA
ENSMUSG00000085842	0.096074	0.929694	4.08046	0.227841	0.81977	NA
ENSMUSG00000103002	0.096074	0.929694	4.08046	0.227841	0.81977	NA
ENSMUSG00000101509	0.0876728	-0.0320929	4.08046	-0.00786503	0.993725	NA
ENSMUSG00000085019	0.426984	1.79151	3.94939	0.453617	0.650105	NA
ENSMUSG00000085400	0.701002	2.35719	3.48924	0.67556	0.49932	NA
ENSMUSG00000100750	2.48868	-1.47845	1.45915	-1.01323	0.31095	NA
ENSMUSG00000081950	0.106905	-0.0320929	4.08046	-0.00786503	0.993725	NA
ENSMUSG00000084333	0.429007	-0.0321075	4.08046	-0.0078686	0.993722	NA
ENSMUSG00000025969	6161.25	0.270514	0.16944	1.59651	0.110374	0.905768
ENSMUSG00000100811	3.75781	0.196534	1.10432	0.177968	0.858748	NA
ENSMUSG00000103032	28.4891	0.295328	0.399903	0.738499	0.460211	NA
ENSMUSG00000100426	0.328797	0.929681	4.08046	0.227838	0.819773	NA
ENSMUSG00000040865	1659.17	-0.113253	0.177274	-0.638857	0.522916	0.997241
ENSMUSG00000081617	0.309128	-2.55852	3.98976	-0.641272	0.521346	NA
ENSMUSG00000081429	0.866697	-1.32752	2.01484	-0.65887	0.509979	NA
ENSMUSG00000084799	49.4384	0.0457071	0.298043	0.153357	0.878116	NA
ENSMUSG00000101599	219.488	0.102774	0.218529	0.470299	0.638142	0.997241
ENSMUSG00000025968	1458.29	0.0592421	0.0884365	0.669883	0.502932	0.997241
ENSMUSG00000077884	0.543786	-0.10833	3.18439	-0.0340191	0.972862	NA
ENSMUSG00000025967	15641.6	0.0846681	0.135197	0.626258	0.531146	0.997241
ENSMUSG00000064602	7.28335	0.76242	1.1664	0.653654	0.513335	NA
ENSMUSG00000046856	3.66813	-0.287825	1.15323	-0.249581	0.802912	NA
ENSMUSG00000027520	5.03094	0.105738	0.930833	0.113595	0.909559	NA
ENSMUSG00000081643	58.4433	-0.232669	0.404069	-0.575816	0.564739	NA
ENSMUSG00000025964	27.0686	-0.486209	0.563659	-0.862594	0.388361	NA
ENSMUSG00000025963	0.307392	1.89698	4.03164	0.470522	0.637982	NA
ENSMUSG00000025962	508.698	0.0163363	0.125675	0.129988	0.896576	0.997964
ENSMUSG00000025961	5.57294	-2.23355	1.1433	-1.9536	0.050749	NA
ENSMUSG00000082373	0.096074	0.929694	4.08046	0.227841	0.81977	NA
ENSMUSG00000044689	0.506831	2.31602	4.00053	0.578928	0.562638	NA
ENSMUSG00000025959	1469.11	0.182758	0.118694	1.53974	0.123623	0.908999
ENSMUSG00000086836	2.49082	0.559793	1.53731	0.364139	0.715754	NA
ENSMUSG00000101895	0.727423	-2.55539	3.41224	-0.74889	0.453923	NA
ENSMUSG00000025958	1893.76	-0.0505757	0.116625	-0.433661	0.664535	0.997241
ENSMUSG00000025956	259.496	-0.0936433	0.145988	-0.641447	0.521232	0.997241
ENSMUSG00000101832	5.15171	2.19657	1.20934	1.81634	0.0693185	NA
ENSMUSG00000100437	0.412171	-2.97541	3.9691	-0.749645	0.453468	NA
ENSMUSG00000087213	12.5173	-0.1492	0.703797	-0.211994	0.832112	NA
ENSMUSG00000070871	408.511	-0.211621	0.218248	-0.969635	0.332228	0.988037
ENSMUSG00000045005	878.9	-0.424926	0.271775	-1.56352	0.117929	0.908999
ENSMUSG00000102140	1.17537	1.99151	1.97576	1.00798	0.313466	NA
ENSMUSG00000051344	513.943	0.312996	0.18659	1.67746	0.0934528	0.877581
ENSMUSG00000097264	0.926336	1.74223	3.3217	0.524501	0.59993	NA
ENSMUSG00000084416	1127.47	0.0265255	0.145464	0.182351	0.855308	0.997744
ENSMUSG00000025955	0.321755	-0.032104	4.08046	-0.00786775	0.993723	NA
ENSMUSG00000100774	1.06404	-0.0320791	2.54212	-0.0126191	0.989932	NA
ENSMUSG00000044816	1.18875	1.01989	2.89923	0.351779	0.725004	NA
ENSMUSG00000025950	2683.92	0.00684204	0.119445	0.057282	0.954321	0.998877
ENSMUSG00000025949	1002.16	-0.0869105	0.132367	-0.656586	0.511447	0.997241
ENSMUSG00000025946	0.739931	1.74773	2.96375	0.589703	0.55539	NA
ENSMUSG00000015222	549.452	-0.100276	0.481159	-0.208404	0.834913	0.997744
ENSMUSG00000073656	0.666036	1.05139	2.54486	0.413144	0.679501	NA
ENSMUSG00000055567	1.00253	-1.69596	2.42667	-0.698883	0.484625	NA
ENSMUSG00000026005	813.66	0.00409909	0.119615	0.0342689	0.972663	0.998877
ENSMUSG00000026004	472.494	-0.101307	0.16596	-0.610429	0.541578	0.997241
ENSMUSG00000102559	23.3195	0.386473	0.571497	0.676246	0.498884	NA
ENSMUSG00000102374	21.3201	0.416003	0.496044	0.838642	0.40167	NA
ENSMUSG00000102776	12.3015	-0.393346	0.606759	-0.648274	0.516808	NA
ENSMUSG00000082057	7.39236	0.235059	0.78256	0.300372	0.763893	NA
ENSMUSG00000103706	9.22231	-0.686777	0.754165	-0.910646	0.362482	NA
ENSMUSG00000103756	15.9111	0.32791	0.539884	0.607371	0.543605	NA
ENSMUSG00000103382	6.77981	-0.855338	0.806135	-1.06104	0.288673	NA
ENSMUSG00000103553	6.06818	0.421176	0.93713	0.449432	0.65312	NA
ENSMUSG00000026003	3554.38	-0.0122196	0.127475	-0.0958588	0.923633	0.998877
ENSMUSG00000082769	5.48812	1.02665	0.985118	1.04216	0.297336	NA
ENSMUSG00000089420	0.375895	2.43148	3.9934	0.608876	0.542607	NA
ENSMUSG00000061816	1378.54	0.792444	0.618154	1.28195	0.199859	0.953247
ENSMUSG00000094191	0.0879607	0.929694	4.08046	0.227841	0.81977	NA
ENSMUSG00000082212	0.300211	2.48508	3.99027	0.622786	0.533425	NA
ENSMUSG00000026000	894.189	-0.024463	0.137303	-0.178168	0.858591	0.997744
ENSMUSG00000025991	2.8239	-3.16289	2.6365	-1.19965	0.230274	NA
ENSMUSG00000062209	0.096074	0.929694	4.08046	0.227841	0.81977	NA
ENSMUSG00000101387	0.412171	-2.97541	3.9691	-0.749645	0.453468	NA
ENSMUSG00000099804	0.400281	2.90178	3.96948	0.731022	0.464766	NA
ENSMUSG00000101156	1.22783	0.0122879	2.33902	0.00525344	0.995808	NA
ENSMUSG00000025997	373.2	-0.117346	0.198603	-0.590855	0.554617	0.997241
ENSMUSG00000100815	0.379093	0.135979	3.99759	0.0340151	0.972865	NA
ENSMUSG00000099954	1.09727	1.37245	2.40813	0.569922	0.56873	NA
ENSMUSG00000053153	0.0980465	-0.993852	4.08046	-0.243564	0.807569	NA
ENSMUSG00000026196	525.727	0.0106841	0.249489	0.0428237	0.965842	0.998877
ENSMUSG00000089965	3.27103	-0.739611	1.2344	-0.599166	0.549062	NA
ENSMUSG00000050296	4.63256	-0.0162349	2.32049	-0.00699632	0.994418	NA
ENSMUSG00000101617	0.175346	-0.0320981	4.08046	-0.00786631	0.993724	NA
ENSMUSG00000026192	5205.26	0.0235138	0.0961469	0.244561	0.806796	0.997744
ENSMUSG00000026193	260603	0.29426	0.240117	1.22548	0.220393	0.959568
ENSMUSG00000073652	5.09132	0.659372	0.928607	0.710065	0.477664	NA
ENSMUSG00000101834	0.178953	-1.79309	4.04682	-0.443086	0.657703	NA
ENSMUSG00000102689	0.393237	-0.061237	3.98751	-0.0153572	0.987747	NA
ENSMUSG00000099707	33.7876	1.00882	0.43867	2.29973	0.0214635	NA
ENSMUSG00000101211	48.445	0.487966	0.495323	0.985147	0.324552	NA
ENSMUSG00000101848	9.09414	-0.503653	0.883875	-0.569824	0.568797	NA
ENSMUSG00000101764	0.175346	-0.0320981	4.08046	-0.00786631	0.993724	NA
ENSMUSG00000101496	0.469485	-2.49316	3.99357	-0.624295	0.532434	NA
ENSMUSG00000102123	8.13358	-0.572878	0.99721	-0.574481	0.565643	NA
ENSMUSG00000039395	60.8455	0.107371	0.462744	0.232032	0.816513	NA
ENSMUSG00000094655	1.7228	2.18438	2.18478	0.999815	0.3174	NA
ENSMUSG00000094050	0.475116	-1.88721	3.67703	-0.513244	0.60778	NA
ENSMUSG00000093956	2.84717	-0.863937	1.41156	-0.612043	0.54051	NA
ENSMUSG00000093843	2.44077	1.17009	1.57849	0.741275	0.458527	NA
ENSMUSG00000026189	333.939	0.115078	0.14301	0.80468	0.421004	0.996821
ENSMUSG00000026188	1.7436	4.47257	2.13307	2.09677	0.0360136	NA
ENSMUSG00000026187	1203	-0.0161633	0.11376	-0.142083	0.887014	0.997964
ENSMUSG00000039372	6.55726	-0.14884	0.886605	-0.167877	0.86668	NA
ENSMUSG00000039354	616.458	0.0513587	0.153014	0.335646	0.737138	0.997241
ENSMUSG00000110712	0.64351	-0.0321124	4.08046	-0.0078698	0.993721	NA
ENSMUSG00000039342	0.214503	-0.0320994	4.08046	-0.00786662	0.993723	NA
ENSMUSG00000046330	7057.98	0.129064	0.213198	0.605373	0.544931	0.997241
ENSMUSG00000039323	55.6807	0.408373	0.436239	0.936122	0.349211	NA
ENSMUSG00000026185	1588.77	0.0939846	0.551177	0.170516	0.864604	0.997964
ENSMUSG00000101968	0.357906	-2.78606	3.97776	-0.70041	0.483671	NA
ENSMUSG00000100301	0.527188	2.72877	3.9774	0.686067	0.492671	NA
ENSMUSG00000101344	0.584985	0.429065	3.04147	0.141071	0.887814	NA
ENSMUSG00000055322	1299.63	0.00740481	0.2122	0.0348954	0.972163	0.998877
ENSMUSG00000061815	51.9261	0.12926	0.477825	0.270517	0.786763	NA
ENSMUSG00000026180	273.657	-0.261918	0.28871	-0.907201	0.3643	0.988037
ENSMUSG00000048480	12.2592	-0.215772	0.681132	-0.316784	0.751408	NA
ENSMUSG00000006304	8317.93	0.0621221	0.0961729	0.645942	0.518317	0.997241
ENSMUSG00000064272	1.09107	0.776031	2.34064	0.331546	0.740232	NA
ENSMUSG00000006299	2331.47	0.0698747	0.105821	0.660309	0.509055	0.997241
ENSMUSG00000026179	542.736	0.126341	0.134472	0.939539	0.347454	0.988037
ENSMUSG00000103013	4.18722	1.44392	1.21683	1.18662	0.235377	NA
ENSMUSG00000006301	2272.36	-0.0290716	0.0969603	-0.29983	0.764307	0.997666
ENSMUSG00000103403	1.65284	0.236196	2.12029	0.111398	0.911301	NA
ENSMUSG00000073650	5.50742	1.2921	1.28717	1.00383	0.31546	NA
ENSMUSG00000026177	491.68	0.568935	0.190518	2.98626	0.00282414	0.339994
ENSMUSG00000026176	3669.15	-0.0877439	0.0920282	-0.953446	0.340364	0.988037
ENSMUSG00000065468	0.46603	-0.613264	3.18607	-0.192483	0.847364	NA
ENSMUSG00000026175	7.39798	-0.475432	1.03157	-0.460881	0.644884	NA
ENSMUSG00000033364	910.073	-0.0701844	0.111276	-0.630722	0.528222	0.997241
ENSMUSG00000103227	7.71101	0.307612	0.811168	0.379222	0.704523	NA
ENSMUSG00000026174	1677.45	0.000613018	0.11447	0.00535529	0.995727	0.99988
ENSMUSG00000026173	21.1048	0.942912	0.670741	1.40578	0.159791	NA
ENSMUSG00000026135	638.422	-0.0214278	0.120669	-0.177575	0.859057	0.997744
ENSMUSG00000093155	0.902319	-1.49541	2.60166	-0.574791	0.565433	NA
ENSMUSG00000026172	363.928	0.101781	0.120985	0.841274	0.400195	0.993941
ENSMUSG00000026171	728.279	0.127886	0.11372	1.12457	0.260771	0.978997
ENSMUSG00000033276	255.78	0.0339389	0.194894	0.17414	0.861755	0.997744
ENSMUSG00000033257	2931.06	-0.146618	0.121572	-1.20602	0.227811	0.963508
ENSMUSG00000026170	192.13	-0.0297338	0.180729	-0.164521	0.869321	0.997964
ENSMUSG00000006542	35.6368	0.510385	0.639461	0.798149	0.424784	NA
ENSMUSG00000033227	62.4833	-0.00835714	0.504704	-0.0165585	0.986789	NA
ENSMUSG00000099472	0.471171	0.686246	3.73373	0.183797	0.854173	NA
ENSMUSG00000026167	250.853	0.390456	0.383372	1.01848	0.30845	0.984307
ENSMUSG00000090071	55.2601	-0.0983246	0.512554	-0.191832	0.847873	NA
ENSMUSG00000055197	0.0876728	-0.0320929	4.08046	-0.00786503	0.993725	NA
ENSMUSG00000006546	0.0894764	-0.993852	4.08046	-0.243564	0.807569	NA
ENSMUSG00000006538	3.15722	-0.903667	1.11921	-0.807415	0.419428	NA
ENSMUSG00000103145	0.816112	-2.22232	2.82371	-0.787022	0.431269	NA
ENSMUSG00000026162	53.9329	0.252466	0.283316	0.891111	0.37287	NA
ENSMUSG00000026205	9.92003	0.530708	0.61732	0.859695	0.389957	NA
ENSMUSG00000033159	1675.67	0.105372	0.110595	0.952778	0.340702	0.988037
ENSMUSG00000049339	1910.37	0.0021794	0.117559	0.0185387	0.985209	0.998877
ENSMUSG00000026197	271.051	0.13405	0.178532	0.750848	0.452744	0.997241
ENSMUSG00000026198	3.78481	1.28286	1.17754	1.08944	0.27596	NA
ENSMUSG00000033124	508.66	0.00916647	0.141268	0.0648871	0.948264	0.998877
ENSMUSG00000026199	563.558	0.191309	0.127654	1.49866	0.133963	0.916301
ENSMUSG00000026200	164.209	0.210618	0.157832	1.33445	0.182057	0.943039
ENSMUSG00000026201	1079.67	-0.0206332	0.113052	-0.18251	0.855182	0.997744
ENSMUSG00000026202	1867.73	0.000130388	0.150993	0.000863535	0.999311	0.99988
ENSMUSG00000096094	4.16857	1.42767	1.50418	0.949137	0.342551	NA
ENSMUSG00000118482	0.214503	-0.0320994	4.08046	-0.00786662	0.993723	NA
ENSMUSG00000026203	748.679	-0.0970206	0.117433	-0.826178	0.408703	0.995671
ENSMUSG00000026204	318.815	-0.20194	0.551053	-0.366463	0.71402	0.997241
ENSMUSG00000026209	1524.48	-0.0499826	0.111384	-0.448742	0.653618	0.997241
ENSMUSG00000026208	3794.45	0.201006	0.549483	0.365809	0.714508	0.997241
ENSMUSG00000085653	2.24448	2.12859	1.58967	1.33902	0.180566	NA
ENSMUSG00000026207	235.892	0.00976948	0.261383	0.0373762	0.970185	0.998877
ENSMUSG00000086053	0.106905	-0.0320929	4.08046	-0.00786503	0.993725	NA
ENSMUSG00000033021	1068.9	0.213632	0.116779	1.82937	0.0673443	0.825874
ENSMUSG00000033007	0.196093	-1.90747	4.03632	-0.472577	0.636515	NA
ENSMUSG00000102605	0.096074	0.929694	4.08046	0.227841	0.81977	NA
ENSMUSG00000032997	2480.43	-0.0355392	0.110672	-0.321122	0.748118	0.997241
ENSMUSG00000026211	280.714	-0.159152	0.565988	-0.281193	0.778562	0.997744
ENSMUSG00000051703	38.0812	-0.362497	0.357596	-1.01371	0.310723	NA
ENSMUSG00000032968	15.8114	0.127139	0.782725	0.162432	0.870966	NA
ENSMUSG00000026213	821.152	0.181948	0.106135	1.71431	0.0864724	0.867685
ENSMUSG00000006576	479.897	0.0311906	0.140209	0.222458	0.823957	0.997744
ENSMUSG00000026235	55.8301	-0.151825	0.479752	-0.316466	0.751649	NA
ENSMUSG00000101849	0.0879607	0.929694	4.08046	0.227841	0.81977	NA
ENSMUSG00000102052	0.612932	2.44854	3.57316	0.685259	0.49318	NA
ENSMUSG00000004872	2.5223	0.739752	1.30557	0.56661	0.570979	NA
ENSMUSG00000032908	3.77822	0.177367	1.24646	0.142297	0.886845	NA
ENSMUSG00000026245	1263.86	0.0821304	0.100482	0.817362	0.413722	0.996275
ENSMUSG00000101798	4.00571	1.56797	1.16077	1.3508	0.176761	NA
ENSMUSG00000104018	10.6733	0.869401	0.69257	1.25533	0.20936	NA
ENSMUSG00000012187	2.28259	-4.11042	2.5005	-1.64384	0.100209	NA
ENSMUSG00000099364	3.85014	0.554786	1.53509	0.361403	0.717798	NA
ENSMUSG00000100562	0.0876728	-0.0320929	4.08046	-0.00786503	0.993725	NA
ENSMUSG00000032883	1234.16	-0.0369755	0.116961	-0.316134	0.751901	0.997241
ENSMUSG00000079470	161.531	0.00387247	0.206713	0.0187335	0.985054	0.998877
ENSMUSG00000099377	3.8561	1.00198	1.12486	0.890765	0.373055	NA
ENSMUSG00000047330	81.2431	0.285763	0.450706	0.634036	0.526057	NA
ENSMUSG00000072978	1.69632	-1.711	1.65323	-1.03494	0.300696	NA
ENSMUSG00000050711	0.614015	-1.57071	3.06957	-0.511704	0.608858	NA
ENSMUSG00000054702	303.268	-0.127431	0.186123	-0.684662	0.493557	0.997241
ENSMUSG00000102235	4.17217	-0.57668	2.00237	-0.287998	0.773348	NA
ENSMUSG00000073643	969.69	0.0627199	0.131027	0.47868	0.632166	0.997241
ENSMUSG00000026248	499.307	-0.0308417	0.14078	-0.219077	0.82659	0.997744
ENSMUSG00000026249	6929.07	0.449071	0.469883	0.955707	0.33922	0.988037
ENSMUSG00000067106	2.48031	-0.404975	1.44966	-0.279359	0.779969	NA
ENSMUSG00000100397	0.103043	-0.993852	4.08046	-0.243564	0.807569	NA
ENSMUSG00000099552	0.196381	-0.993858	4.08046	-0.243565	0.807567	NA
ENSMUSG00000043230	14.1131	0.216228	0.650465	0.33242	0.739572	NA
ENSMUSG00000004364	3007.7	-0.0211198	0.0967908	-0.218201	0.827273	0.997744
ENSMUSG00000103076	13.6441	0.0547696	0.549828	0.0996123	0.920652	NA
ENSMUSG00000103525	3.15043	0.338019	1.12902	0.299391	0.764642	NA
ENSMUSG00000038608	754.511	-0.148649	0.181896	-0.817224	0.413801	0.996275
ENSMUSG00000103192	1.02083	-0.716508	2.37298	-0.301944	0.762695	NA
ENSMUSG00000104488	1.04095	3.80473	2.22675	1.70865	0.0875162	NA
ENSMUSG00000102721	0.918277	2.52284	2.86153	0.88164	0.377971	NA
ENSMUSG00000054976	15.667	-0.00879208	0.798739	-0.0110075	0.991218	NA
ENSMUSG00000087008	3.7716	-0.213998	1.109	-0.192966	0.846986	NA
ENSMUSG00000103571	0.209147	-0.0320986	4.08046	-0.00786642	0.993724	NA
ENSMUSG00000055980	613.993	-0.267979	0.264785	-1.01207	0.311507	0.985117
ENSMUSG00000026142	644.132	0.0246423	0.145834	0.168974	0.865817	0.997964
ENSMUSG00000104493	5.48662	0.0270668	0.826253	0.0327585	0.973867	NA
ENSMUSG00000100786	1.05703	-2.63387	2.79455	-0.942502	0.345935	NA
ENSMUSG00000096779	0.242949	-0.0320999	4.08046	-0.00786675	0.993723	NA
ENSMUSG00000067158	8.9908	1.49673	0.737946	2.02824	0.0425358	NA
ENSMUSG00000079465	2.22776	0.510571	1.58089	0.322965	0.746722	NA
ENSMUSG00000097564	2.51432	-1.23738	1.72413	-0.717688	0.47295	NA
ENSMUSG00000026150	1752.61	-0.016707	0.0884497	-0.188886	0.850182	0.997744
ENSMUSG00000101450	20.4963	0.443103	0.614522	0.721053	0.470877	NA
ENSMUSG00000026149	0.844725	-1.68629	2.3076	-0.730753	0.46493	NA
ENSMUSG00000114299	0.642816	-0.0321123	4.08046	-0.00786979	0.993721	NA
ENSMUSG00000102280	0.210951	-0.993858	4.08046	-0.243565	0.807567	NA
ENSMUSG00000100744	0.417829	0.929677	4.08046	0.227836	0.819773	NA
ENSMUSG00000026159	3036.91	-0.0224143	0.0950284	-0.235869	0.813534	0.997744
ENSMUSG00000113880	10.4569	-0.428689	0.676564	-0.633627	0.526324	NA
ENSMUSG00000113973	0.830358	2.21674	2.86869	0.772737	0.439678	NA
ENSMUSG00000113846	0.103043	-0.993852	4.08046	-0.243564	0.807569	NA
ENSMUSG00000113084	0.10007	0.929694	4.08046	0.227841	0.81977	NA
ENSMUSG00000113925	0.309128	-2.55852	3.98976	-0.641272	0.521346	NA
ENSMUSG00000114011	0.206085	-1.97005	4.03091	-0.488735	0.625029	NA
ENSMUSG00000038496	1.81607	3.8044	2.48688	1.52979	0.126069	NA
ENSMUSG00000100432	0.192148	1.84568	4.03609	0.457296	0.647459	NA
ENSMUSG00000100190	0.103043	-0.993852	4.08046	-0.243564	0.807569	NA
ENSMUSG00000113267	0.0876728	-0.0320929	4.08046	-0.00786503	0.993725	NA
ENSMUSG00000101315	1.04059	4.28554	3.37725	1.26894	0.204461	NA
ENSMUSG00000099691	0.214503	-0.0320994	4.08046	-0.00786662	0.993723	NA
ENSMUSG00000026166	1.86607	3.43933	2.52873	1.3601	0.173798	NA
ENSMUSG00000101173	0.096074	0.929694	4.08046	0.227841	0.81977	NA
ENSMUSG00000026163	2.28812	0.486172	1.43714	0.338291	0.735144	NA
ENSMUSG00000045658	326.067	0.613024	0.267406	2.29249	0.0218775	0.649547
ENSMUSG00000102750	0.175346	-0.0320981	4.08046	-0.00786631	0.993724	NA
ENSMUSG00000101934	0.350691	-0.0321053	4.08046	-0.00786807	0.993722	NA
ENSMUSG00000098851	0.107252	-0.0320929	4.08046	-0.00786503	0.993725	NA
ENSMUSG00000036766	5.4146	0.119886	1.21854	0.0983849	0.921627	NA
ENSMUSG00000026219	7215.83	0.00365185	0.108923	0.0335268	0.973254	0.998877
ENSMUSG00000103505	8.14387	-0.556894	0.753196	-0.739374	0.45968	NA
ENSMUSG00000104503	21.1884	0.997104	0.50271	1.98346	0.0473162	NA
ENSMUSG00000073633	69.455	0.253195	0.261378	0.968693	0.332698	NA
ENSMUSG00000026220	6.46633	0.446463	1.01913	0.43808	0.661328	NA
ENSMUSG00000118590	33.5277	-0.702463	0.647268	-1.08527	0.2778	NA
ENSMUSG00000099693	1.04554	-1.58221	2.34725	-0.674069	0.500267	NA
ENSMUSG00000052477	27.5426	-0.837482	0.725837	-1.15382	0.248576	NA
ENSMUSG00000064281	1.62624	-0.298432	1.39181	-0.21442	0.830219	NA
ENSMUSG00000118640	10.1847	-0.924773	0.8135	-1.13678	0.255629	NA
ENSMUSG00000061852	11.214	-0.664244	0.615714	-1.07882	0.280669	NA
ENSMUSG00000089976	0.530673	-1.59525	3.67791	-0.433738	0.664479	NA
ENSMUSG00000101279	9.56352	-1.5419	0.726756	-2.12162	0.0338695	NA
ENSMUSG00000089844	32.3779	-0.0914505	0.418924	-0.218299	0.827196	NA
ENSMUSG00000073631	0.621788	-0.437947	3.89573	-0.112417	0.910492	NA
ENSMUSG00000072109	216.645	-0.255859	0.389791	-0.656401	0.511566	0.997241
ENSMUSG00000090128	0.228379	-0.0320995	4.08046	-0.00786665	0.993723	NA
ENSMUSG00000090186	0.573791	0.00848699	3.51871	0.00241196	0.998076	NA
ENSMUSG00000089716	16.3358	-0.300863	0.771242	-0.390102	0.696461	NA
ENSMUSG00000118618	3.24481	-2.26832	1.21772	-1.86276	0.0624966	NA
ENSMUSG00000079457	18.2241	-0.657038	0.905038	-0.725979	0.467852	NA
ENSMUSG00000090252	2.2673	0.675421	1.87563	0.360103	0.71877	NA
ENSMUSG00000079455	3.41944	-0.522837	1.39572	-0.374601	0.707957	NA
ENSMUSG00000091199	11.4738	-0.454203	0.805653	-0.56377	0.572911	NA
ENSMUSG00000089652	0.48771	-0.621206	3.69897	-0.16794	0.86663	NA
ENSMUSG00000118591	2.53386	-1.32219	1.83109	-0.72208	0.470245	NA
ENSMUSG00000101751	7.64432	0.69418	0.721311	0.962386	0.335855	NA
ENSMUSG00000089714	1.60501	-1.19632	1.96801	-0.607881	0.543267	NA
ENSMUSG00000118607	58.3239	-0.2676	0.523635	-0.511044	0.609321	NA
ENSMUSG00000094127	0.0876728	-0.0320929	4.08046	-0.00786503	0.993725	NA
ENSMUSG00000070034	1206.38	-0.123426	0.254216	-0.485517	0.62731	0.997241
ENSMUSG00000090103	5.57184	-0.275612	1.0831	-0.254466	0.799136	NA
ENSMUSG00000070031	684.621	-0.0447328	0.27034	-0.165469	0.868575	0.997964
ENSMUSG00000073628	1.36431	-0.270349	1.69993	-0.159035	0.873641	NA
ENSMUSG00000090246	23.5942	0.226108	0.480572	0.470498	0.637999	NA
ENSMUSG00000026222	2079.99	-0.160874	0.189775	-0.847709	0.3966	0.993941
ENSMUSG00000052760	514.139	0.257352	0.192594	1.33624	0.18147	0.943039
ENSMUSG00000100217	0.914329	2.85957	3.2859	0.870254	0.384162	NA
ENSMUSG00000036707	2770.06	-0.147352	0.0842435	-1.74912	0.0802696	0.857579
ENSMUSG00000026223	6319.14	0.0704747	0.134065	0.525678	0.599112	0.997241
ENSMUSG00000026224	5.03135	-0.67322	1.16024	-0.580242	0.561752	NA
ENSMUSG00000099767	1.584	-0.796908	1.68358	-0.473342	0.635969	NA
ENSMUSG00000049608	39.0359	-0.0951022	0.406532	-0.233935	0.815035	NA
ENSMUSG00000100108	1.47462	-0.560841	2.4151	-0.232223	0.816365	NA
ENSMUSG00000099342	54.7765	-0.735181	0.412151	-1.78377	0.0744618	NA
ENSMUSG00000026227	0.302998	-1.90748	4.03632	-0.472578	0.636514	NA
ENSMUSG00000026229	3362.52	0.0690866	0.0896079	0.770988	0.440714	0.997241
ENSMUSG00000077274	0.321615	1.89698	4.03164	0.470522	0.637982	NA
ENSMUSG00000026228	34.3446	-0.102735	0.495099	-0.207504	0.835616	NA
ENSMUSG00000103272	14.2352	-0.427992	0.556034	-0.769724	0.441464	NA
ENSMUSG00000062590	335.322	0.072191	0.140148	0.515105	0.60648	0.997241
ENSMUSG00000087538	1.99073	2.86964	2.02124	1.41974	0.155683	NA
ENSMUSG00000079445	388.963	-0.000467899	0.183847	-0.00254505	0.997969	0.99988
ENSMUSG00000026234	23580.3	0.192247	0.164396	1.16941	0.242238	0.972831
ENSMUSG00000073627	45.8468	-0.0685381	0.330709	-0.207246	0.835818	NA
ENSMUSG00000110510	0.0894764	-0.993852	4.08046	-0.243564	0.807569	NA
ENSMUSG00000026237	0.597137	-3.23073	3.95905	-0.816036	0.41448	NA
ENSMUSG00000036574	0.400281	2.90178	3.96948	0.731022	0.464766	NA
ENSMUSG00000101328	0.0876728	-0.0320929	4.08046	-0.00786503	0.993725	NA
ENSMUSG00000026238	28552.2	0.129367	0.0945846	1.36774	0.171395	0.940274
ENSMUSG00000026239	597.656	0.148765	0.159468	0.932883	0.35088	0.988037
ENSMUSG00000102927	5.53472	0.463635	0.871135	0.532219	0.594574	NA
ENSMUSG00000026240	492.673	0.0583017	0.156857	0.371686	0.710127	0.997241
ENSMUSG00000103609	1.64816	-0.501896	1.75796	-0.2855	0.775261	NA
ENSMUSG00000026241	6.19758	0.272241	0.920747	0.295674	0.767479	NA
ENSMUSG00000053333	521.924	-0.0473653	0.122107	-0.387899	0.698091	0.997241
ENSMUSG00000100225	1.12179	2.80634	2.40936	1.16477	0.244113	NA
ENSMUSG00000100768	1.83696	2.05769	2.0381	1.00961	0.312681	NA
ENSMUSG00000104121	2.58364	1.1147	1.24007	0.898894	0.368709	NA
ENSMUSG00000102383	1.53146	-1.77995	1.7437	-1.02079	0.307354	NA
ENSMUSG00000104400	2.65941	0.496413	1.64386	0.301981	0.762667	NA
ENSMUSG00000102293	1.52965	0.261025	2.56807	0.101642	0.919041	NA
ENSMUSG00000102649	3.35414	0.808938	1.02748	0.787305	0.431103	NA
ENSMUSG00000084106	2200.63	0.118124	0.106947	1.10452	0.26937	0.978997
ENSMUSG00000102571	3.27241	-0.371328	1.55008	-0.239555	0.810675	NA
ENSMUSG00000099401	0.581571	-0.0407362	3.63812	-0.011197	0.991066	NA
ENSMUSG00000102956	0.497406	-0.892433	3.27164	-0.272779	0.785023	NA
ENSMUSG00000103984	17.8441	0.0723874	0.542232	0.133499	0.893799	NA
ENSMUSG00000101940	0.307392	1.89698	4.03164	0.470522	0.637982	NA
ENSMUSG00000026247	0.0894764	-0.993852	4.08046	-0.243564	0.807569	NA
ENSMUSG00000036480	1.99526	1.77699	2.69887	0.658419	0.510269	NA
ENSMUSG00000026251	36.1009	-0.0926289	0.752124	-0.123156	0.901983	NA
ENSMUSG00000026253	22.3403	-0.0369318	1.53531	-0.0240549	0.980809	NA
ENSMUSG00000026254	1902.77	0.0254843	0.0818493	0.311356	0.75553	0.997241
ENSMUSG00000088318	0.202979	0.929688	4.08046	0.227839	0.819771	NA
ENSMUSG00000026255	4.56421	-0.0107212	1.1149	-0.00961632	0.992327	NA
ENSMUSG00000048000	2103.57	-0.0655137	0.117917	-0.555592	0.57849	0.997241
ENSMUSG00000095281	2.24553	0.708576	1.66155	0.426456	0.669776	NA
ENSMUSG00000079436	0.590752	-1.05213	3.48577	-0.301836	0.762777	NA
ENSMUSG00000089613	0.741118	1.46812	3.0166	0.486679	0.626486	NA
ENSMUSG00000026258	0.943881	0.39185	2.12293	0.184579	0.853559	NA
ENSMUSG00000026259	253.664	-0.395476	0.350594	-1.12802	0.259313	0.978997
ENSMUSG00000079434	95.2452	0.301517	0.294996	1.0221	0.306732	NA
ENSMUSG00000091123	1.47503	0.616865	1.88909	0.326542	0.744014	NA
ENSMUSG00000090994	0.771313	-2.47605	2.78122	-0.890276	0.373318	NA
ENSMUSG00000026288	1461.17	0.170354	0.125362	1.35889	0.174181	0.940274
ENSMUSG00000026289	1029.05	-0.0572595	0.105915	-0.540617	0.588771	0.997241
ENSMUSG00000087968	1.8205	-1.03384	1.60633	-0.643605	0.519831	NA
ENSMUSG00000089281	3.09759	0.391425	1.41377	0.276867	0.781882	NA
ENSMUSG00000056055	59.1794	0.431875	0.327131	1.32019	0.186772	NA
ENSMUSG00000070738	4625.12	-0.0222987	0.18329	-0.121658	0.90317	0.998877
ENSMUSG00000101942	5.92748	0.460247	0.92501	0.497559	0.618795	NA
ENSMUSG00000103996	3.4339	0.455833	1.28854	0.353758	0.72352	NA
ENSMUSG00000103591	13.3887	0.626009	0.569607	1.09902	0.27176	NA
ENSMUSG00000005501	985.918	0.11887	0.154361	0.770076	0.441255	0.997241
ENSMUSG00000090165	0.351555	2.31602	4.00053	0.578929	0.562637	NA
ENSMUSG00000090124	112.961	0.261435	0.268748	0.972786	0.330659	0.988037
ENSMUSG00000082837	0.194577	-0.0320986	4.08046	-0.00786642	0.993724	NA
ENSMUSG00000090145	1.19322	-0.919573	2.78784	-0.329851	0.741513	NA
ENSMUSG00000084195	0.281624	0.883919	4.03608	0.219004	0.826647	NA
ENSMUSG00000081261	0.294046	-1.00827	4.03091	-0.250134	0.802484	NA
ENSMUSG00000054545	3.67475	1.64781	1.17833	1.39843	0.161985	NA
ENSMUSG00000081602	0.43894	1.7353	4.04619	0.428872	0.668017	NA
ENSMUSG00000082513	0.350979	0.929679	4.08046	0.227837	0.819773	NA
ENSMUSG00000089943	0.482342	1.88521	3.97189	0.474637	0.635046	NA
ENSMUSG00000118621	0.28225	-0.0321026	4.08046	-0.00786741	0.993723	NA
ENSMUSG00000081488	0.713828	-0.0700386	2.88744	-0.0242563	0.980648	NA
ENSMUSG00000083277	0.242949	-0.0320999	4.08046	-0.00786675	0.993723	NA
ENSMUSG00000090171	0.457596	-0.0321084	4.08046	-0.00786883	0.993722	NA
ENSMUSG00000081984	3.5467	-0.649974	1.39207	-0.46691	0.640564	NA
ENSMUSG00000089960	0.321061	-0.032104	4.08046	-0.00786775	0.993723	NA
ENSMUSG00000079429	281.979	0.195506	0.153163	1.27646	0.201794	0.953247
ENSMUSG00000044783	5504.34	0.0140196	0.14735	0.0951453	0.924199	0.998877
ENSMUSG00000036251	2.47448	1.20369	1.92129	0.626501	0.530987	NA
ENSMUSG00000026295	0.303285	-0.993864	4.08046	-0.243567	0.807566	NA
ENSMUSG00000099553	1.16297	1.00704	2.03295	0.495359	0.620346	NA
ENSMUSG00000100908	0.366696	-0.831316	4.04682	-0.205424	0.837241	NA
ENSMUSG00000062310	954.798	0.557374	0.153364	3.63433	0.000278704	0.144787
ENSMUSG00000100798	263.015	0.721394	0.29019	2.48594	0.012921	0.565801
ENSMUSG00000104057	2.07625	0.500124	1.89387	0.264075	0.791722	NA
ENSMUSG00000100367	1.58955	2.2355	2.18412	1.02353	0.306058	NA
ENSMUSG00000049866	9905.55	-0.0957229	0.104515	-0.915874	0.359733	0.988037
ENSMUSG00000097398	2.00173	-1.04457	1.95248	-0.534998	0.592651	NA
ENSMUSG00000101333	0.0879607	0.929694	4.08046	0.227841	0.81977	NA
ENSMUSG00000099378	0.271995	2.35536	3.99804	0.58913	0.555774	NA
ENSMUSG00000036206	1621.54	0.0955907	0.0943722	1.01291	0.311102	0.985117
ENSMUSG00000102700	109.797	0.473796	0.36881	1.28466	0.19891	NA
ENSMUSG00000101288	0.106905	-0.0320929	4.08046	-0.00786503	0.993725	NA
ENSMUSG00000055013	2119.9	-0.0933901	0.143359	-0.651444	0.51476	0.997241
ENSMUSG00000104114	2.80774	1.13778	1.56739	0.725907	0.467896	NA
ENSMUSG00000088371	1.18506	1.46292	2.22482	0.657543	0.510832	NA
ENSMUSG00000101662	2.52434	-0.15686	1.72001	-0.0911972	0.927336	NA
ENSMUSG00000102009	2.59636	0.6519	1.22123	0.533805	0.593477	NA
ENSMUSG00000103252	4.01857	-0.117481	1.08625	-0.108152	0.913875	NA
ENSMUSG00000034486	5.18501	-0.101359	1.07897	-0.09394	0.925157	NA
ENSMUSG00000092627	11.6279	0.642849	0.725139	0.886518	0.375339	NA
ENSMUSG00000067081	2.76956	-0.72591	1.65886	-0.437597	0.661679	NA
ENSMUSG00000026301	0.121475	-0.0320929	4.08046	-0.00786503	0.993725	NA
ENSMUSG00000100850	0.0894764	-0.993852	4.08046	-0.243564	0.807569	NA
ENSMUSG00000044337	742.57	0.170289	0.315423	0.539874	0.589284	0.997241
ENSMUSG00000104087	0.564093	3.40236	3.95119	0.861096	0.389185	NA
ENSMUSG00000101951	0.690001	2.85611	2.61416	1.09255	0.274591	NA
ENSMUSG00000101028	1.70088	-0.348256	1.47024	-0.236871	0.812757	NA
ENSMUSG00000101997	0.321755	-0.032104	4.08046	-0.00786775	0.993723	NA
ENSMUSG00000103292	2.83522	1.83536	1.55093	1.18339	0.236653	NA
ENSMUSG00000034432	1391.89	0.00384957	0.100268	0.0383927	0.969375	0.998877
ENSMUSG00000056128	0.9644	-0.0321173	4.08046	-0.00787101	0.99372	NA
ENSMUSG00000048126	7445.08	0.423913	0.529083	0.801223	0.423003	0.997241
ENSMUSG00000103061	0.107252	-0.0320929	4.08046	-0.00786503	0.993725	NA
ENSMUSG00000026303	56.3258	0.156006	0.430185	0.362647	0.716868	NA
ENSMUSG00000026304	82.7114	0.386441	0.345604	1.11816	0.263499	NA
ENSMUSG00000100791	0.412171	-2.97541	3.9691	-0.749645	0.453468	NA
ENSMUSG00000026305	3339.51	0.0668382	0.0950556	0.703149	0.481963	0.997241
ENSMUSG00000070732	0.768154	0.62455	2.69386	0.231842	0.81666	NA
ENSMUSG00000100018	2.21625	0.248249	1.69801	0.1462	0.883764	NA
ENSMUSG00000034353	1141.34	-0.0627298	0.300256	-0.208921	0.83451	0.997744
ENSMUSG00000034343	1398.19	-0.19528	0.114075	-1.71186	0.0869223	0.868387
ENSMUSG00000083064	9.16054	-0.529602	0.586663	-0.902738	0.366665	NA
ENSMUSG00000026307	913.595	0.110022	0.161287	0.682149	0.495145	0.997241
ENSMUSG00000090322	4.25459	0.695612	1.52598	0.455846	0.648501	NA
ENSMUSG00000049515	17.7236	0.33094	0.702804	0.470886	0.637722	NA
ENSMUSG00000026308	118.932	0.160172	0.393997	0.406531	0.684353	0.997241
ENSMUSG00000047443	248.001	0.111337	0.358111	0.310902	0.755875	0.997241
ENSMUSG00000026309	1384.41	0.18156	0.110606	1.6415	0.100694	0.887509
ENSMUSG00000100253	0.10007	0.929694	4.08046	0.227841	0.81977	NA
ENSMUSG00000067071	556.399	-0.0797834	0.139494	-0.571949	0.567356	0.997241
ENSMUSG00000055866	264.76	-0.100382	0.158817	-0.632058	0.527349	0.997241
ENSMUSG00000100151	0.288222	2.43149	3.9934	0.608878	0.542606	NA
ENSMUSG00000101958	0.242949	-0.0320999	4.08046	-0.00786675	0.993723	NA
ENSMUSG00000034292	410.944	-0.069267	0.167065	-0.414612	0.678426	0.997241
ENSMUSG00000026311	259.689	-0.110958	0.171381	-0.647431	0.517353	0.997241
ENSMUSG00000101705	0.29414	-2.49315	3.99357	-0.624292	0.532436	NA
ENSMUSG00000100980	18.5341	0.181734	0.525469	0.345851	0.729454	NA
ENSMUSG00000007805	27.0363	0.886717	0.667376	1.32866	0.183959	NA
ENSMUSG00000101414	0.876431	0.302595	2.65086	0.11415	0.909119	NA
ENSMUSG00000102745	0.720089	-0.49803	2.95807	-0.168363	0.866298	NA
ENSMUSG00000026313	1304.76	0.0811132	0.155171	0.522735	0.601159	0.997241
ENSMUSG00000103101	2.46384	0.248184	1.44035	0.172308	0.863195	NA
ENSMUSG00000102565	1.48895	-0.443033	1.88298	-0.235283	0.813989	NA
ENSMUSG00000026260	1952.7	0.07804	0.113538	0.687346	0.491864	0.997241
ENSMUSG00000073616	522.768	0.176325	0.213478	0.825961	0.408826	0.995671
ENSMUSG00000044055	5.67597	1.81342	1.28354	1.41283	0.157706	NA
ENSMUSG00000100546	0.0876728	-0.0320929	4.08046	-0.00786503	0.993725	NA
ENSMUSG00000099665	1.58601	2.98159	2.07263	1.43855	0.150277	NA
ENSMUSG00000100781	3.2504	-2.52513	1.45028	-1.74113	0.0816606	NA
ENSMUSG00000034220	9887.07	0.290254	0.147861	1.96303	0.0496432	0.814878
ENSMUSG00000101995	18.7334	-0.285125	0.609016	-0.468173	0.639661	NA
ENSMUSG00000065470	0.459738	2.80425	3.16256	0.886702	0.375239	NA
ENSMUSG00000034212	15.2677	0.928607	0.643647	1.44273	0.149097	NA
ENSMUSG00000047067	142.484	-0.0730418	0.200316	-0.364633	0.715385	0.997241
ENSMUSG00000097251	16.0122	0.216845	0.489615	0.44289	0.657845	NA
ENSMUSG00000026269	2009.1	-0.0560393	0.104674	-0.535367	0.592396	0.997241
ENSMUSG00000100632	2.17909	1.01058	1.6158	0.625434	0.531686	NA
ENSMUSG00000026270	533.992	0.0203009	0.114704	0.176986	0.85952	0.997744
ENSMUSG00000026271	571.182	-0.111166	0.17222	-0.645486	0.518613	0.997241
ENSMUSG00000100021	0.371439	-1.90748	4.03632	-0.472579	0.636513	NA
ENSMUSG00000045091	0.703109	3.31131	3.95407	0.837444	0.402343	NA
ENSMUSG00000014602	60.568	-0.127009	0.321592	-0.394938	0.692889	NA
ENSMUSG00000026272	0.434464	-1.96936	3.91786	-0.502662	0.615202	NA
ENSMUSG00000034159	147.595	-0.366267	0.993124	-0.368803	0.712274	0.997241
ENSMUSG00000084989	11.1251	0.434903	0.635594	0.684246	0.49382	NA
ENSMUSG00000047793	1554.17	0.447261	0.45866	0.975147	0.329488	0.988037
ENSMUSG00000026273	324.196	0.00112833	0.145941	0.00773137	0.993831	0.99988
ENSMUSG00000101172	0.589608	-2.29913	3.48782	-0.659188	0.509775	NA
ENSMUSG00000100351	1.73467	-1.03386	1.94123	-0.532579	0.594325	NA
ENSMUSG00000026274	311.733	0.205572	0.1543	1.33229	0.182766	0.943039
ENSMUSG00000026275	1090.6	0.0119292	0.0888276	0.134296	0.893169	0.997964
ENSMUSG00000098689	0.281624	0.883919	4.03608	0.219004	0.826647	NA
ENSMUSG00000064389	2.60341	-0.864916	1.20613	-0.7171	0.473312	NA
ENSMUSG00000034107	1.61572	-1.24729	1.78585	-0.698433	0.484907	NA
ENSMUSG00000034088	14054.5	0.13165	0.0848179	1.55215	0.120625	0.908999
ENSMUSG00000090489	13.2591	0.435626	0.6115	0.712389	0.476224	NA
ENSMUSG00000026276	103.074	-0.326525	0.213882	-1.52666	0.126846	NA
ENSMUSG00000034066	168.03	-0.143029	0.248664	-0.575188	0.565164	0.997241
ENSMUSG00000103854	2.02681	-3.37088	1.86055	-1.81177	0.0700222	NA
ENSMUSG00000026277	3028.28	0.0506615	0.0823633	0.615097	0.53849	0.997241
ENSMUSG00000100927	2.67558	-2.72514	1.7646	-1.54434	0.122507	NA
ENSMUSG00000026278	1719.49	0.0269642	0.122711	0.219737	0.826076	0.997744
ENSMUSG00000026279	578.656	-0.0394377	0.185342	-0.212783	0.831496	0.997744
ENSMUSG00000101952	0.381719	-1.00827	4.03091	-0.250135	0.802483	NA
ENSMUSG00000026280	1357.69	-0.0173086	0.0976048	-0.177333	0.859247	0.997744
ENSMUSG00000026281	1475.58	0.196533	0.154493	1.27212	0.203331	0.953247
ENSMUSG00000026283	806.64	-0.0310353	0.154522	-0.200846	0.840819	0.997744
ENSMUSG00000088961	0.189547	-0.0320709	4.08046	-0.00785964	0.993729	NA
ENSMUSG00000073609	150.087	-0.0376103	0.228217	-0.1648	0.869101	0.997964
ENSMUSG00000094651	0.18555	-0.0320709	4.08046	-0.00785964	0.993729	NA
ENSMUSG00000101660	3.29718	0.774635	1.52702	0.507284	0.611955	NA
ENSMUSG00000093805	11.7872	0.60102	0.714562	0.841102	0.400291	NA
ENSMUSG00000099624	4.27601	0.91566	1.18587	0.772143	0.44003	NA
ENSMUSG00000073608	0.359956	2.75911	3.97595	0.693951	0.487713	NA
ENSMUSG00000026285	67.8941	-0.34462	0.947544	-0.363699	0.716083	NA
ENSMUSG00000100347	14.729	-0.180303	0.516596	-0.349022	0.727073	NA
ENSMUSG00000051185	534.944	-0.014419	0.163617	-0.0881261	0.929776	0.998877
ENSMUSG00000103973	10.8622	-0.390421	0.704951	-0.553827	0.579697	NA
ENSMUSG00000081051	956.366	-0.0071015	0.115677	-0.0613909	0.951048	0.998877
ENSMUSG00000040710	394.562	0.0703944	0.243601	0.288974	0.772601	0.997744
ENSMUSG00000103197	1.01925	-1.45507	2.76259	-0.526703	0.5984	NA
ENSMUSG00000040693	7.46089	1.27567	1.02592	1.24344	0.213707	NA
ENSMUSG00000097814	3.01372	-1.69017	1.40961	-1.19904	0.230514	NA
ENSMUSG00000100454	0.718722	-1.79901	3.44001	-0.522965	0.600998	NA
ENSMUSG00000044757	2.53524	-0.328635	1.41884	-0.231621	0.816832	NA
ENSMUSG00000103179	0.321755	-0.032104	4.08046	-0.00786775	0.993723	NA
ENSMUSG00000044768	812.129	-0.256975	0.120187	-2.13813	0.0325059	0.735615
ENSMUSG00000040648	1858.37	-0.149216	0.119551	-1.24814	0.211978	0.954083
ENSMUSG00000026333	112.832	0.142693	0.209351	0.681594	0.495496	0.997241
ENSMUSG00000026335	5253.79	-0.135533	0.143287	-0.945881	0.344209	0.988037
ENSMUSG00000104140	3.54607	-1.02612	1.20418	-0.852127	0.394144	NA
ENSMUSG00000089169	2.1058	-0.152849	1.90065	-0.0804194	0.935904	NA
ENSMUSG00000089782	223.249	-0.0342268	0.174107	-0.196585	0.844152	0.997744
ENSMUSG00000089706	32.8704	0.74456	0.409365	1.81882	0.0689395	NA
ENSMUSG00000096085	1.31794	1.49558	2.47793	0.603561	0.546136	NA
ENSMUSG00000100182	5.24392	-0.824787	1.2008	-0.686864	0.492168	NA
ENSMUSG00000099634	0.385691	1.50559	3.97749	0.378528	0.705038	NA
ENSMUSG00000089791	19.8514	-0.869295	0.578456	-1.50279	0.132894	NA
ENSMUSG00000100009	219.427	0.361466	0.21376	1.69099	0.0908385	0.876933
ENSMUSG00000099686	2.88729	-0.100238	1.50716	-0.0665078	0.946974	NA
ENSMUSG00000082431	16.7735	-0.0759675	0.545928	-0.139153	0.889329	NA
ENSMUSG00000099835	0.103043	-0.993852	4.08046	-0.243564	0.807569	NA
ENSMUSG00000100794	0.0876728	-0.0320929	4.08046	-0.00786503	0.993725	NA
ENSMUSG00000100349	1.67851	4.17993	1.80124	2.32058	0.0203093	NA
ENSMUSG00000099375	9.2997	0.416297	0.654706	0.635853	0.524872	NA
ENSMUSG00000050840	0.183747	0.929688	4.08046	0.227839	0.819771	NA
ENSMUSG00000103060	0.0876728	-0.0320929	4.08046	-0.00786503	0.993725	NA
ENSMUSG00000047496	546.269	-0.0812228	0.213815	-0.379874	0.704039	0.997241
ENSMUSG00000097482	10.5685	0.979671	0.78811	1.24306	0.213844	NA
ENSMUSG00000101214	5.35744	0.293626	1.05222	0.279054	0.780203	NA
ENSMUSG00000067017	207.24	0.0352839	0.184571	0.191167	0.848395	0.997744
ENSMUSG00000056536	2158.24	0.0782854	0.148174	0.528334	0.597268	0.997241
ENSMUSG00000100672	3.04154	-0.43986	1.44242	-0.304945	0.760408	NA
ENSMUSG00000101219	0.121475	-0.0320929	4.08046	-0.00786503	0.993725	NA
ENSMUSG00000101656	1.27173	2.57863	2.785	0.925899	0.354498	NA
ENSMUSG00000026319	1153.74	-0.118549	0.156661	-0.756723	0.449216	0.997241
ENSMUSG00000104044	2.39618	-0.895656	1.5162	-0.590724	0.554705	NA
ENSMUSG00000101330	2.51842	-0.310292	1.36639	-0.227089	0.820354	NA
ENSMUSG00000026321	392.592	0.0955636	0.214507	0.445504	0.655956	0.997241
ENSMUSG00000099448	0.409716	0.929677	4.08046	0.227836	0.819773	NA
ENSMUSG00000099843	71.0516	0.0563333	0.315359	0.178632	0.858227	NA
ENSMUSG00000038866	1367.16	-0.224518	0.126605	-1.77337	0.0761675	0.849041
ENSMUSG00000102501	0.520079	-2.92936	3.61444	-0.810462	0.417675	NA
ENSMUSG00000097612	1.54405	1.37789	2.0177	0.682901	0.49467	NA
ENSMUSG00000101583	1.61221	-0.344614	2.11143	-0.163213	0.87035	NA
ENSMUSG00000044340	1560.71	-0.0615258	0.142392	-0.432087	0.665678	0.997241
ENSMUSG00000103291	8.30117	-1.0392	0.820633	-1.26634	0.205391	NA
ENSMUSG00000100247	23.43	0.210659	0.50954	0.413429	0.679292	NA
ENSMUSG00000057329	2178.68	-0.180418	0.252605	-0.714231	0.475084	0.997241
ENSMUSG00000054006	2.2424	1.83137	1.85355	0.988038	0.323134	NA
ENSMUSG00000098344	0.566186	2.17277	2.93414	0.740514	0.458988	NA
ENSMUSG00000103348	2.45237	1.88072	1.6186	1.16194	0.245261	NA
ENSMUSG00000009905	1178.84	-0.0751613	0.124816	-0.602178	0.547056	0.997241
ENSMUSG00000009907	2202.25	-0.00199115	0.0796498	-0.0249988	0.980056	0.998877
ENSMUSG00000067006	186.107	-0.557968	0.446329	-1.25013	0.211253	0.953392
ENSMUSG00000059956	4.81804	-0.351691	1.1856	-0.296636	0.766744	NA
ENSMUSG00000048775	0.107252	-0.0320929	4.08046	-0.00786503	0.993725	NA
ENSMUSG00000073602	6.46678	-2.97546	3.9691	-0.749657	NA	NA
ENSMUSG00000026327	0.456758	-0.0321082	4.08046	-0.00786877	0.993722	NA
ENSMUSG00000067001	3.18541	0.935174	4.03164	0.231959	0.81657	NA
ENSMUSG00000062345	28.467	1.2783	1.45617	0.87785	NA	NA
ENSMUSG00000092572	3.26573	-0.141082	1.5634	-0.0902401	0.928096	NA
ENSMUSG00000026315	64.4998	0.357563	0.367201	0.973755	0.330178	NA
ENSMUSG00000086161	1.7874	-3.24702	1.80176	-1.80214	0.0715232	NA
ENSMUSG00000100457	0.121475	-0.0320929	4.08046	-0.00786503	0.993725	NA
ENSMUSG00000047216	4.06316	0.18896	1.5064	0.125438	0.900176	NA
ENSMUSG00000100555	0.701958	-0.0331175	2.4438	-0.0135517	0.989188	NA
ENSMUSG00000102728	2.92813	-0.317793	1.39093	-0.228475	0.819277	NA
ENSMUSG00000038702	559.15	-0.173584	0.186225	-0.932117	0.351276	0.988037
ENSMUSG00000099884	0.956847	-1.96899	3.85892	-0.510243	0.609881	NA
ENSMUSG00000102030	3.98137	2.96339	1.60883	1.84195	0.0654821	NA
ENSMUSG00000099870	0.362987	0.0302743	4.007	0.00755535	0.993972	NA
ENSMUSG00000026374	2343.91	-0.0410604	0.0895797	-0.458368	0.646688	0.997241
ENSMUSG00000026377	1176.46	-0.142763	0.105416	-1.35427	0.175649	0.940274
ENSMUSG00000099936	0.189547	-0.0320709	4.08046	-0.00785964	0.993729	NA
ENSMUSG00000064302	1792.01	-0.0817083	0.111923	-0.730042	0.465364	0.997241
ENSMUSG00000100770	0.944988	-0.993871	2.77306	-0.358402	0.720042	NA
ENSMUSG00000026380	203.578	-0.634975	0.406505	-1.56203	0.11828	0.908999
ENSMUSG00000101624	0.0894764	-0.993852	4.08046	-0.243564	0.807569	NA
ENSMUSG00000048402	77.2503	0.348398	0.34828	1.00034	0.317148	NA
ENSMUSG00000098273	0.107252	-0.0320929	4.08046	-0.00786503	0.993725	NA
ENSMUSG00000099860	1.04643	0.467656	2.23206	0.209517	0.834044	NA
ENSMUSG00000101179	5.09049	2.11002	1.32136	1.59685	0.110299	NA
ENSMUSG00000037035	2140.09	0.290977	0.202957	1.43369	0.15166	0.931018
ENSMUSG00000004451	2355.11	0.163917	0.0973746	1.68336	0.0923047	0.876933
ENSMUSG00000101437	1.52987	0.398324	1.54757	0.257387	0.79688	NA
ENSMUSG00000098447	6.03032	0.713925	0.922752	0.773692	0.439113	NA
ENSMUSG00000098923	544.466	0.00979158	0.121124	0.080839	0.93557	0.998877
ENSMUSG00000101731	0.764571	1.34922	2.7776	0.485751	0.627144	NA
ENSMUSG00000026383	318.843	-0.290998	0.198408	-1.46667	0.142466	0.918524
ENSMUSG00000102687	0.283766	-1.90748	4.03632	-0.472578	0.636514	NA
ENSMUSG00000026384	945.967	-0.161073	0.191393	-0.841582	0.400022	0.993941
ENSMUSG00000091876	0.908474	-1.02493	3.03969	-0.337184	0.735978	NA
ENSMUSG00000103146	4.8351	0.869178	1.18495	0.733514	0.463245	NA
ENSMUSG00000090277	0.500351	3.22474	3.95698	0.814949	0.415102	NA
ENSMUSG00000100636	1.4884	2.43001	3.06584	0.792609	0.428006	NA
ENSMUSG00000101224	0.657516	-0.641579	3.03492	-0.211399	0.832576	NA
ENSMUSG00000036975	148.206	-0.14048	0.219312	-0.640549	0.521815	0.997241
ENSMUSG00000026387	4.48165	-0.0403178	1.02628	-0.0392854	0.968663	NA
ENSMUSG00000050777	234.954	0.056765	0.249405	0.227601	0.819956	0.997744
ENSMUSG00000026385	1052.04	0.215356	0.184323	1.16836	0.242662	0.972831
ENSMUSG00000026388	45.1791	-0.126982	0.293948	-0.431989	0.665749	NA
ENSMUSG00000026389	360.058	0.294996	0.254531	1.15898	0.246466	0.974604
ENSMUSG00000026390	3.27342	2.18161	1.67519	1.30231	0.192812	NA
ENSMUSG00000058665	19.3653	0.478823	0.844357	0.567087	0.570655	NA
ENSMUSG00000101386	0.178953	-1.79309	4.04682	-0.443086	0.657703	NA
ENSMUSG00000102360	0.107252	-0.0320929	4.08046	-0.00786503	0.993725	NA
ENSMUSG00000097881	0.309128	-2.55852	3.98976	-0.641272	0.521346	NA
ENSMUSG00000104332	0.192519	-1.88357	4.03845	-0.46641	0.640922	NA
ENSMUSG00000003721	1190.02	0.0229073	0.115004	0.199187	0.842116	0.997744
ENSMUSG00000104253	12.901	0.614506	0.580444	1.05868	0.289745	NA
ENSMUSG00000101791	0.873738	3.37364	3.19185	1.05696	0.290532	NA
ENSMUSG00000026339	677.932	-0.0497583	0.130891	-0.38015	0.703834	0.997241
ENSMUSG00000083582	0.517095	-0.993872	4.08046	-0.243569	0.807565	NA
ENSMUSG00000050534	135.926	-0.238601	0.829628	-0.2876	0.773653	0.997744
ENSMUSG00000081130	0.303183	0.935217	4.03164	0.23197	0.816562	NA
ENSMUSG00000001674	1579.05	-0.0559707	0.0850743	-0.657904	0.5106	0.997241
ENSMUSG00000026341	9105.34	-0.0117277	0.111069	-0.10559	0.915908	0.998877
ENSMUSG00000102063	1.13428	-4.14489	2.88457	-1.43692	0.150741	NA
ENSMUSG00000026342	919.348	-0.0858263	0.146354	-0.586428	0.557588	0.997241
ENSMUSG00000026343	133.046	-0.487665	0.254367	-1.91718	0.0552156	0.820103
ENSMUSG00000026344	4.79527	-0.731319	1.00866	-0.72504	0.468428	NA
ENSMUSG00000049690	2.96407	0.887261	1.16141	0.763949	0.444898	NA
ENSMUSG00000036155	1645.5	-0.269778	0.132503	-2.03602	0.0417483	0.788133
ENSMUSG00000104039	1.70961	-1.0847	2.24991	-0.482108	0.62973	NA
ENSMUSG00000104378	4.97931	0.286221	1.06117	0.269721	0.787375	NA
ENSMUSG00000099471	3.31531	-0.00989957	1.39219	-0.00711079	0.994326	NA
ENSMUSG00000065687	0.296163	-0.945691	4.03632	-0.234295	0.814756	NA
ENSMUSG00000103390	0.828128	-0.963727	2.82076	-0.341656	0.73261	NA
ENSMUSG00000026347	5.82892	-0.500742	0.993925	-0.503803	0.6144	NA
ENSMUSG00000026348	1.01996	-1.75525	2.12613	-0.825562	0.409052	NA
ENSMUSG00000102014	0.742276	3.11388	2.50457	1.24328	0.213765	NA
ENSMUSG00000026349	1901.91	0.014226	0.0865769	0.164317	0.869482	0.997964
ENSMUSG00000051590	4.56878	-0.0736463	1.33668	-0.0550965	0.956062	NA
ENSMUSG00000036104	1496.13	-0.012173	0.0938034	-0.129772	0.896747	0.997964
ENSMUSG00000036086	224.966	0.501224	0.209582	2.39154	0.016778	0.611823
ENSMUSG00000099760	2.39845	-0.326501	1.66301	-0.196331	0.844351	NA
ENSMUSG00000104164	17.7241	0.501046	0.632892	0.791677	0.428549	NA
ENSMUSG00000058603	543.709	0.0364234	0.160369	0.227122	0.820329	0.997744
ENSMUSG00000102782	2.0161	0.0195905	1.44898	0.0135201	0.989213	NA
ENSMUSG00000103999	1.43659	-0.0665343	1.50788	-0.0441244	0.964805	NA
ENSMUSG00000056211	1865.72	0.062623	0.0877505	0.713648	0.475445	0.997241
ENSMUSG00000101535	1.20253	0.619453	2.18181	0.283917	0.776474	NA
ENSMUSG00000104239	1.58882	0.32062	1.9802	0.161913	0.871374	NA
ENSMUSG00000102179	3.89961	0.14651	1.02568	0.142842	0.886415	NA
ENSMUSG00000103497	1.3346	1.02526	2.10575	0.486887	0.626338	NA
ENSMUSG00000065520	0.175921	1.73531	4.04619	0.428875	0.668014	NA
ENSMUSG00000026353	2839.53	-0.0914431	0.0740135	-1.23549	0.216647	0.957265
ENSMUSG00000026354	4.12613	-0.740405	0.989748	-0.748074	0.454416	NA
ENSMUSG00000026355	4178.78	0.232927	0.167685	1.38907	0.164811	0.940274
ENSMUSG00000026356	2321.74	-0.0660303	0.090868	-0.726661	0.467434	0.997241
ENSMUSG00000100078	11.7467	-0.0882238	0.604226	-0.146011	0.883912	NA
ENSMUSG00000045382	625.244	0.19299	0.194683	0.991307	0.321536	0.988037
ENSMUSG00000097283	2.14251	0.310883	2.03959	0.152425	0.878852	NA
ENSMUSG00000042581	2.67209	-0.195742	1.57179	-0.124534	0.900892	NA
ENSMUSG00000089648	2.77655	-1.0562	1.26145	-0.837287	0.402432	NA
ENSMUSG00000094122	1.64526	0.637962	1.7161	0.371751	0.710078	NA
ENSMUSG00000087691	1.54557	1.05746	1.75119	0.603854	0.545941	NA
ENSMUSG00000086825	12.0212	1.26009	1.07409	1.17317	0.240729	NA
ENSMUSG00000026399	75.704	0.228279	0.388071	0.588239	0.556372	NA
ENSMUSG00000085526	0.577788	0.882015	3.15574	0.279496	0.779864	NA
ENSMUSG00000102139	0.10007	0.929694	4.08046	0.227841	0.81977	NA
ENSMUSG00000026405	0.186007	-0.0320709	4.08046	-0.00785964	0.993729	NA
ENSMUSG00000101904	0.196381	-0.993858	4.08046	-0.243565	0.807567	NA
ENSMUSG00000100257	0.372014	-0.140073	4.00167	-0.0350037	0.972077	NA
ENSMUSG00000026409	223.539	-0.0047553	0.189781	-0.0250568	0.98001	0.998877
ENSMUSG00000046404	275.493	0.0114148	0.170415	0.0669823	0.946596	0.998877
ENSMUSG00000104515	1.45838	0.878924	2.06259	0.426127	0.670016	NA
ENSMUSG00000042510	39.0521	0.360256	0.344693	1.04515	0.295954	NA
ENSMUSG00000099556	0.702779	-1.47831	3.02999	-0.487892	0.625627	NA
ENSMUSG00000026415	2.22734	-0.602252	1.63695	-0.367911	0.712939	NA
ENSMUSG00000086706	2.07208	-1.31329	2.44275	-0.537626	0.590835	NA
ENSMUSG00000026417	22.9098	-0.233095	0.749702	-0.310917	0.755864	NA
ENSMUSG00000042474	20.6205	2.29794	0.964372	2.38283	0.01718	NA
ENSMUSG00000026420	72.053	-0.786494	1.01161	-0.777467	0.436883	NA
ENSMUSG00000016524	2.16744	4.20626	2.41662	1.74056	0.0817614	NA
ENSMUSG00000016529	7.82803	-0.831892	1.04909	-0.792968	0.427797	NA
ENSMUSG00000016528	4571.63	0.0718769	0.0937596	0.766608	0.443315	0.997241
ENSMUSG00000088705	1.29243	1.00491	2.17855	0.461273	0.644603	NA
ENSMUSG00000102856	18.6611	-0.2474	0.513664	-0.481637	0.630064	NA
ENSMUSG00000016526	523.955	-0.178845	0.195677	-0.913984	0.360725	0.988037
ENSMUSG00000026427	1310.44	0.187213	0.1134	1.6509	0.0987586	0.882485
ENSMUSG00000026430	554.919	0.200355	0.161886	1.23763	0.215853	0.956299
ENSMUSG00000101729	0.364424	-0.0321054	4.08046	-0.00786808	0.993722	NA
ENSMUSG00000042349	951.08	0.164447	0.13299	1.23654	0.21626	0.956513
ENSMUSG00000102027	5.58851	-0.380869	0.937478	-0.40627	0.684544	NA
ENSMUSG00000102055	15.3553	0.806158	0.626979	1.28578	0.19852	NA
ENSMUSG00000026425	1893.29	0.104739	0.0841492	1.24468	0.213248	0.954179
ENSMUSG00000102733	1.13926	2.83109	2.39061	1.18426	0.236312	NA
ENSMUSG00000104060	3.08352	0.0454751	1.55408	0.0292619	0.976656	NA
ENSMUSG00000101778	1.69188	-0.723087	1.37228	-0.526926	0.598245	NA
ENSMUSG00000099959	0.306368	-0.0320769	4.08046	-0.00786111	0.993728	NA
ENSMUSG00000076287	0.459399	-0.945499	3.88329	-0.243479	0.807634	NA
ENSMUSG00000055184	48.2924	-0.201967	0.361518	-0.558663	0.576392	NA
ENSMUSG00000095841	0.813766	1.46681	2.98746	0.49099	0.623433	NA
ENSMUSG00000004552	152.421	-0.156176	0.231234	-0.675403	0.49942	0.997241
ENSMUSG00000052688	117.641	0.102388	0.238905	0.428573	0.668234	0.997241
ENSMUSG00000042268	47.3668	0.198824	0.477188	0.416658	0.676929	NA
ENSMUSG00000042251	3.86167	0.987114	1.31953	0.748082	0.45441	NA
ENSMUSG00000013275	1026.9	-0.0200504	0.11568	-0.173326	0.862395	0.997744
ENSMUSG00000026433	185.458	0.149904	0.18482	0.811082	0.417319	0.996275
ENSMUSG00000026434	5333.15	0.0830186	0.128028	0.648441	0.516699	0.997241
ENSMUSG00000103569	15.0703	-0.493488	0.722966	-0.682588	0.494867	NA
ENSMUSG00000026435	67.6718	-0.344626	0.38623	-0.892282	0.372242	NA
ENSMUSG00000026436	1909.94	0.140631	0.123438	1.13928	0.254586	0.977035
ENSMUSG00000059149	857.896	-0.0486281	0.130867	-0.371585	0.710202	0.997241
ENSMUSG00000103966	13.608	0.122066	0.679272	0.179702	0.857387	NA
ENSMUSG00000026437	790.898	-0.0570594	0.118124	-0.483048	0.629062	0.997241
ENSMUSG00000099874	0.0894764	-0.993852	4.08046	-0.243564	0.807569	NA
ENSMUSG00000079330	12.0116	0.0531754	0.813547	0.0653624	0.947885	NA
ENSMUSG00000118219	40.8731	-0.145525	0.676831	-0.215009	0.82976	NA
ENSMUSG00000066936	0.121475	-0.0320929	4.08046	-0.00786503	0.993725	NA
ENSMUSG00000101549	26.2324	0.802326	0.686023	1.16953	0.242189	NA
ENSMUSG00000089808	9.62541	-0.239019	0.716786	-0.333459	0.738788	NA
ENSMUSG00000042115	179.489	-0.23466	0.306455	-0.765726	0.44384	0.997241
ENSMUSG00000009772	834.295	-0.131866	0.108726	-1.21284	0.225192	0.962333
ENSMUSG00000100658	10.6651	0.403419	0.817452	0.493507	0.621654	NA
ENSMUSG00000042066	213.282	-0.299155	0.237731	-1.25837	0.208257	0.953247
ENSMUSG00000090079	0.607373	-0.0321116	4.08046	-0.0078696	0.993721	NA
ENSMUSG00000042046	910.982	-0.12451	0.144859	-0.859526	0.39005	0.99383
ENSMUSG00000097760	11.9371	0.117558	0.594963	0.197589	0.843366	NA
ENSMUSG00000026439	1011.91	-0.0628538	0.0905033	-0.694491	0.487374	0.997241
ENSMUSG00000048174	171.434	0.290689	0.169662	1.71334	0.0866493	0.867799
ENSMUSG00000053024	9.08796	-4.17426	1.47991	-2.82061	0.00479323	NA
ENSMUSG00000026442	22.7427	0.482948	0.694446	0.695444	0.486777	NA
ENSMUSG00000026443	21.3735	-0.30713	0.511957	-0.599913	0.548564	NA
ENSMUSG00000106377	0.096074	0.929694	4.08046	0.227841	0.81977	NA
ENSMUSG00000054387	3771.63	0.188021	0.141517	1.32861	0.183977	0.943621
ENSMUSG00000100228	0.570199	-1.41398	3.64805	-0.387598	0.698314	NA
ENSMUSG00000026447	421.932	-0.182308	0.177802	-1.02534	0.305201	0.984056
ENSMUSG00000101102	0.758023	-1.80637	2.96693	-0.608835	0.542634	NA
ENSMUSG00000102425	6.02779	0.21508	0.847084	0.253907	0.799568	NA
ENSMUSG00000046062	2563.34	-0.144375	0.0911231	-1.5844	0.113103	0.907587
ENSMUSG00000041757	76.5254	0.225969	0.302634	0.746674	0.455261	NA
ENSMUSG00000070645	0.789368	-3.91786	3.73849	-1.04798	0.294649	NA
ENSMUSG00000070644	2.727	-0.5464	1.13593	-0.481016	0.630505	NA
ENSMUSG00000070643	196.442	-0.465133	0.244364	-1.90344	0.0569833	0.820103
ENSMUSG00000064814	0.121475	-0.0320929	4.08046	-0.00786503	0.993725	NA
ENSMUSG00000090553	1232.16	0.0294185	0.188419	0.156133	0.875928	0.997964
ENSMUSG00000102976	283.895	-0.0907825	0.156697	-0.57935	0.562353	0.997241
ENSMUSG00000094410	1076.37	-0.0847044	0.267342	-0.316839	0.751366	0.997241
ENSMUSG00000051998	32.3061	0.396944	0.770927	0.514891	0.606629	NA
ENSMUSG00000026463	327.239	0.0522081	0.198153	0.263474	0.792185	0.997744
ENSMUSG00000102509	0.766733	-0.709745	2.69273	-0.263578	0.792105	NA
ENSMUSG00000010311	4.31088	0.760546	1.04479	0.727942	0.466649	NA
ENSMUSG00000090208	0.309883	0.929681	4.08046	0.227838	0.819772	NA
ENSMUSG00000041577	274.618	0.562056	0.33374	1.68411	0.0921595	0.876933
ENSMUSG00000100987	0.454885	1.76701	3.9774	0.444262	0.656853	NA
ENSMUSG00000041559	345.054	-0.258401	0.895675	-0.288499	0.772965	0.997744
ENSMUSG00000020423	412.716	0.0847477	0.155372	0.54545	0.585444	0.997241
ENSMUSG00000102380	1.35307	3.45514	2.33853	1.47748	0.139547	NA
ENSMUSG00000026450	6.17653	-2.13824	2.00686	-1.06547	NA	NA
ENSMUSG00000064246	168.573	0.406566	0.313963	1.29495	0.195338	0.953247
ENSMUSG00000042451	104.091	0.334055	0.519974	0.642445	0.520584	NA
ENSMUSG00000042429	4.4414	-1.09225	1.26049	-0.866522	0.386204	NA
ENSMUSG00000026459	77.6814	-0.0309908	0.58743	-0.0527566	0.957926	NA
ENSMUSG00000026458	486.604	-0.344488	0.231963	-1.4851	0.137518	0.916301
ENSMUSG00000042305	1724.32	0.0313911	0.079803	0.393357	0.694056	0.997241
ENSMUSG00000050526	1.32666	2.86964	2.01796	1.42205	0.155011	NA
ENSMUSG00000026456	1292.85	0.332779	0.122027	2.72709	0.00638961	0.459288
ENSMUSG00000026457	4124.34	-0.0914149	0.0986762	-0.926413	0.354231	0.988037
ENSMUSG00000101061	1.22623	1.87825	2.00563	0.936488	0.349022	NA
ENSMUSG00000102722	0.735722	0.784851	3.02614	0.259357	0.79536	NA
ENSMUSG00000026455	848.293	0.0374581	0.116149	0.3225	0.747074	0.997241
ENSMUSG00000042229	811.426	-0.0517421	0.148831	-0.347658	0.728097	0.997241
ENSMUSG00000077202	8.12107	-0.0613832	0.794976	-0.0772139	0.938453	NA
ENSMUSG00000096712	4.1878	2.38102	1.47763	1.61138	0.107096	NA
ENSMUSG00000101955	0.951815	-0.372136	2.23671	-0.166376	0.867861	NA
ENSMUSG00000046367	0.952695	-0.0320785	2.56124	-0.0125246	0.990007	NA
ENSMUSG00000042207	2716.6	-0.0379356	0.104831	-0.361873	0.717447	0.997241
ENSMUSG00000097435	0.669122	0.44983	3.00571	0.149659	0.881034	NA
ENSMUSG00000026452	39.8795	0.266644	0.383403	0.695465	0.486764	NA
ENSMUSG00000073557	2171.69	-0.0366105	0.164909	-0.222004	0.824311	0.997744
ENSMUSG00000103614	8.11754	0.444487	0.923593	0.481259	0.630333	NA
ENSMUSG00000077846	0.18555	-0.0320709	4.08046	-0.00785964	0.993729	NA
ENSMUSG00000103976	16.4862	0.357086	0.673386	0.530284	0.595915	NA
ENSMUSG00000101168	0.924557	1.5166	2.93124	0.517392	0.604883	NA
ENSMUSG00000026429	237.011	0.214414	0.198331	1.08109	0.279657	0.980864
ENSMUSG00000042793	1913.99	0.0400403	0.20902	0.191563	0.848085	0.997744
ENSMUSG00000097993	279.442	0.112547	0.36979	0.304353	0.760859	0.997666
ENSMUSG00000097988	4.74719	0.466255	1.10606	0.421544	0.673358	NA
ENSMUSG00000031506	533.935	0.0734145	0.158616	0.462844	0.643476	0.997241
ENSMUSG00000026426	2308.87	0.0101186	0.120422	0.0840263	0.933036	0.998877
ENSMUSG00000087721	28.0644	0.470542	0.37656	1.24958	0.211453	NA
ENSMUSG00000085311	33.7443	0.215695	0.325146	0.663379	0.507088	NA
ENSMUSG00000026424	0.82922	0.931258	3.4479	0.270094	0.787088	NA
ENSMUSG00000079139	1276.9	0.0442085	0.116334	0.380013	0.703936	0.997241
ENSMUSG00000097680	62.5	0.389431	0.362192	1.0752	0.282283	NA
ENSMUSG00000003051	300.391	0.490842	0.351629	1.39591	0.162742	0.940274
ENSMUSG00000041926	1676.14	-0.0133751	0.100899	-0.13256	0.894542	0.997964
ENSMUSG00000062580	1020.23	0.123241	0.113238	1.08834	0.276446	0.979082
ENSMUSG00000048096	36.5471	0.126696	0.449538	0.281837	0.778068	NA
ENSMUSG00000041889	271.295	0.0425719	0.23568	0.180634	0.856655	0.997744
ENSMUSG00000041879	3425.86	0.117724	0.0962823	1.2227	0.221443	0.960447
ENSMUSG00000100620	3.22963	-0.826844	1.10863	-0.745825	0.455773	NA
ENSMUSG00000009418	6863.82	0.133125	0.178983	0.743784	0.457007	0.997241
ENSMUSG00000102474	5.11593	0.634247	1.00216	0.63288	0.526812	NA
ENSMUSG00000104524	8.45543	0.773873	0.742056	1.04288	0.297005	NA
ENSMUSG00000054412	26.1253	0.503276	0.456498	1.10247	0.270256	NA
ENSMUSG00000026421	4849.2	-0.0624722	0.164933	-0.378774	0.704856	0.997241
ENSMUSG00000041801	787.303	-0.158595	0.0975013	-1.62659	0.103824	0.89294
ENSMUSG00000026418	67.7236	-0.269089	0.475182	-0.566287	0.571199	NA
ENSMUSG00000041782	7968.51	-0.100736	0.0941786	-1.06963	0.284787	0.980864
ENSMUSG00000026414	5133.55	0.189918	0.186522	1.0182	0.308581	0.984308
ENSMUSG00000101482	8.98275	-0.128457	0.726687	-0.176771	0.859688	NA
ENSMUSG00000026413	263.869	-0.121183	0.41921	-0.289074	0.772525	0.997744
ENSMUSG00000102414	78.9644	-0.565369	0.474647	-1.19114	0.2336	NA
ENSMUSG00000051985	263.215	-0.577799	0.818914	-0.705568	0.480457	0.997241
ENSMUSG00000026411	1868.07	-0.0127573	0.161646	-0.0789209	0.937096	0.998877
ENSMUSG00000026407	262.472	0.00435421	0.648167	0.00671773	0.99464	0.99988
ENSMUSG00000102838	0.0876728	-0.0320929	4.08046	-0.00786503	0.993725	NA
ENSMUSG00000086264	1.49265	1.37186	2.44523	0.561035	0.574774	NA
ENSMUSG00000041642	745.981	0.218848	0.164987	1.32646	0.184688	0.943621
ENSMUSG00000087230	36.6339	0.184307	0.398344	0.462684	0.643591	NA
ENSMUSG00000041605	1818.84	-0.0240443	0.11777	-0.204163	0.838226	0.997744
ENSMUSG00000103594	1.83489	0.476539	1.42388	0.334675	0.73787	NA
ENSMUSG00000102941	4.73069	0.504021	1.0869	0.463723	0.642846	NA
ENSMUSG00000097433	8.73885	-0.36833	0.957344	-0.384742	0.700429	NA
ENSMUSG00000052759	5.42875	-0.691012	1.0304	-0.670625	0.50246	NA
ENSMUSG00000041570	1685.22	-0.270772	0.150409	-1.80024	0.071823	0.837228
ENSMUSG00000097403	16.8107	0.477075	0.592053	0.805798	0.420359	NA
ENSMUSG00000026404	229.731	0.036483	0.166622	0.218956	0.826684	0.997744
ENSMUSG00000041498	403.378	0.414725	0.240758	1.72258	0.084965	0.863169
ENSMUSG00000099337	0.366696	-0.831316	4.04682	-0.205424	0.837241	NA
ENSMUSG00000101413	1.33386	0.741422	2.30525	0.321623	0.747739	NA
ENSMUSG00000104414	3.84027	1.16411	1.08775	1.0702	0.284529	NA
ENSMUSG00000104509	2.82949	1.31557	2.5654	0.512811	0.608083	NA
ENSMUSG00000097229	0.192148	1.84568	4.03609	0.457296	0.647459	NA
ENSMUSG00000041483	1135.78	-0.170344	0.12367	-1.37741	0.168386	0.940274
ENSMUSG00000097113	40.4296	0.266485	0.350117	0.761131	0.446579	NA
ENSMUSG00000097448	103.307	0.220453	0.241975	0.911056	0.362266	NA
ENSMUSG00000092912	1.68467	-1.71558	1.80867	-0.948529	0.34286	NA
ENSMUSG00000096432	0.607036	-2.012	3.55077	-0.566637	0.570961	NA
ENSMUSG00000104360	0.939165	1.51649	2.9209	0.519186	0.603631	NA
ENSMUSG00000103953	0.510629	-0.0321016	3.68683	-0.00870709	0.993053	NA
ENSMUSG00000026398	87.4462	0.144354	0.450593	0.320364	0.748692	NA
ENSMUSG00000098243	2.12406	-0.0503826	1.50514	-0.0334737	0.973297	NA
ENSMUSG00000104118	2.27501	0.157508	1.87344	0.0840741	0.932997	NA
ENSMUSG00000098045	0.175921	1.73531	4.04619	0.428875	0.668014	NA
ENSMUSG00000103038	0.288222	2.43149	3.9934	0.608878	0.542606	NA
ENSMUSG00000102277	0.472373	1.41437	3.22323	0.438805	0.660803	NA
ENSMUSG00000098145	0.655209	-0.0320813	3.14851	-0.0101894	0.99187	NA
ENSMUSG00000102142	2.64219	2.67221	1.63202	1.63737	0.101554	NA
ENSMUSG00000104145	2.14586	1.77325	1.69394	1.04682	0.295182	NA
ENSMUSG00000103427	2.24731	-1.6404	1.47854	-1.10947	0.267227	NA
ENSMUSG00000098206	7.75132	0.308798	0.868908	0.355386	0.7223	NA
ENSMUSG00000104197	0.283766	-1.90748	4.03632	-0.472578	0.636514	NA
ENSMUSG00000026395	2256.05	0.149582	0.0902464	1.65749	0.0974205	0.881489
ENSMUSG00000104291	13.8961	0.943409	0.728639	1.29476	0.195405	NA
ENSMUSG00000026394	0.349854	-0.0321049	4.08046	-0.00786797	0.993722	NA
ENSMUSG00000101793	0.200141	1.89698	4.03164	0.470524	0.637981	NA
ENSMUSG00000026393	4598.65	-0.0977824	0.124589	-0.784842	0.432546	0.997241
ENSMUSG00000099510	4.08801	2.18093	1.35768	1.60637	0.108193	NA
ENSMUSG00000102651	5.05806	0.0783345	1.07275	0.0730222	0.941788	NA
ENSMUSG00000102448	4.11326	0.196568	0.968492	0.202963	0.839164	NA
ENSMUSG00000100459	0.302159	-1.00827	4.03091	-0.250134	0.802484	NA
ENSMUSG00000019230	23.7621	-0.423457	0.566784	-0.747121	0.45499	NA
ENSMUSG00000079283	258.631	0.0910822	0.18572	0.490428	0.623831	0.997241
ENSMUSG00000102365	1.94306	0.25073	1.53343	0.163509	0.870118	NA
ENSMUSG00000056268	1017.7	-0.0700927	0.129537	-0.541101	0.588438	0.997241
ENSMUSG00000104436	8.47666	-0.248084	0.878101	-0.282523	0.777542	NA
ENSMUSG00000104900	3.02848	-0.74797	1.40633	-0.531858	0.594824	NA
ENSMUSG00000102626	1.43332	-3.37209	1.9002	-1.7746	0.0759645	NA
ENSMUSG00000085361	0.382007	-0.202649	3.99621	-0.0507102	0.959556	NA
ENSMUSG00000102157	4.08942	0.0447775	1.35479	0.0330512	0.973634	NA
ENSMUSG00000105936	2.17105	-1.04745	1.58227	-0.661996	0.507974	NA
ENSMUSG00000102451	1.922	-1.31344	1.73842	-0.75554	0.449925	NA
ENSMUSG00000102243	7.59491	-0.0137747	0.726577	-0.0189584	0.984874	NA
ENSMUSG00000033964	1006.82	-0.206088	0.140916	-1.46248	0.143609	0.918524
ENSMUSG00000033952	855.58	0.130335	0.230831	0.564632	0.572324	0.997241
ENSMUSG00000057037	0.242949	-0.0320999	4.08046	-0.00786675	0.993723	NA
ENSMUSG00000070594	0.242949	-0.0320999	4.08046	-0.00786675	0.993723	NA
ENSMUSG00000033898	2.80671	1.39176	1.95312	0.712583	0.476104	NA
ENSMUSG00000089991	9.6149	0.190737	0.770651	0.247501	0.804521	NA
ENSMUSG00000104496	36.7534	0.589857	0.419187	1.40715	0.159384	NA
ENSMUSG00000085867	2.38829	-0.231671	1.27414	-0.181825	0.85572	NA
ENSMUSG00000103691	0.304132	-2.537	3.991	-0.63568	0.524985	NA
ENSMUSG00000026365	1519.5	0.456929	0.20593	2.21885	0.0264969	0.692409
ENSMUSG00000052726	2.40859	0.251941	1.48826	0.169286	0.865572	NA
ENSMUSG00000102500	0.509268	-0.629451	3.93982	-0.159767	0.873065	NA
ENSMUSG00000101795	44.6604	0.437636	0.347366	1.25987	0.207716	NA
ENSMUSG00000026361	1520.8	-0.154698	0.11968	-1.2926	0.196151	0.953247
ENSMUSG00000033849	14.3945	-0.423305	0.773016	-0.547602	0.583965	NA
ENSMUSG00000089640	2.15688	-0.843726	1.87474	-0.450049	0.652675	NA
ENSMUSG00000018196	531.936	-0.0245697	0.150789	-0.162941	0.870565	0.997964
ENSMUSG00000018199	1721.48	-0.14923	0.155457	-0.959943	0.337084	0.988037
ENSMUSG00000018189	812.843	0.0302245	0.158607	0.190562	0.848869	0.997744
ENSMUSG00000100455	43.6015	-0.0494895	0.433721	-0.114104	0.909155	NA
ENSMUSG00000026360	646.35	-0.079866	0.137664	-0.580151	0.561813	0.997241
ENSMUSG00000051079	1.31928	2.92342	2.36113	1.23814	0.215662	NA
ENSMUSG00000100389	0.321755	-0.032104	4.08046	-0.00786775	0.993723	NA
ENSMUSG00000026358	423.216	0.712027	0.177212	4.01793	5.87115e-05	0.0838767
ENSMUSG00000100441	8.48886	-0.124122	0.803933	-0.154393	0.8773	NA
ENSMUSG00000026357	16.5171	0.314018	0.644963	0.486877	0.626345	NA
ENSMUSG00000102403	0.300211	2.48508	3.99027	0.622786	0.533425	NA
ENSMUSG00000035131	105.175	0.0541417	0.825044	0.0656228	0.947678	NA
ENSMUSG00000080078	0.175346	-0.0320981	4.08046	-0.00786631	0.993724	NA
ENSMUSG00000087627	0.200141	1.89698	4.03164	0.470524	0.637981	NA
ENSMUSG00000085822	0.106905	-0.0320929	4.08046	-0.00786503	0.993725	NA
ENSMUSG00000082588	0.429007	-0.0321075	4.08046	-0.0078686	0.993722	NA
ENSMUSG00000056220	1244	0.34826	0.136912	2.54367	0.0109695	0.54064
ENSMUSG00000077516	0.698372	0.929698	2.99198	0.310729	0.756006	NA
ENSMUSG00000104812	0.096074	0.929694	4.08046	0.227841	0.81977	NA
ENSMUSG00000097028	82.6435	0.0529894	0.359419	0.147431	0.882792	NA
ENSMUSG00000032487	1056.82	0.263204	0.45675	0.576254	0.564443	0.997241
ENSMUSG00000101199	0.106905	-0.0320929	4.08046	-0.00786503	0.993725	NA
ENSMUSG00000097754	17.8086	1.06211	0.514523	2.06427	0.0389926	NA
ENSMUSG00000099875	53.239	0.137506	0.371992	0.369647	0.711645	NA
ENSMUSG00000100690	0.103043	-0.993852	4.08046	-0.243564	0.807569	NA
ENSMUSG00000006007	0.827493	-1.58919	2.92718	-0.542908	0.587193	NA
ENSMUSG00000099447	1.53378	4.32808	1.99751	2.16674	0.0302544	NA
ENSMUSG00000102990	0.790546	2.73207	3.15602	0.865672	0.38667	NA
ENSMUSG00000006010	777.96	0.120701	0.106178	1.13678	0.255631	0.977035
ENSMUSG00000006005	5911.57	0.040801	0.0745051	0.547627	0.583948	0.997241
ENSMUSG00000006014	160.672	-0.354148	0.834646	-0.424309	0.67134	0.997241
ENSMUSG00000066842	60.2073	0.472145	0.450278	1.04856	0.294379	NA
ENSMUSG00000102628	1.23862	-1.49603	2.46701	-0.606413	0.54424	NA
ENSMUSG00000097426	2.98379	1.09028	1.22581	0.889435	0.37377	NA
ENSMUSG00000102095	1.70397	-0.113412	1.69782	-0.0667988	0.946742	NA
ENSMUSG00000114694	0.351843	2.72878	3.9774	0.68607	0.492669	NA
ENSMUSG00000100954	36.2741	-0.139906	0.384718	-0.363659	0.716113	NA
ENSMUSG00000023150	8570.23	-0.0120356	0.0729369	-0.165014	0.868933	0.997964
ENSMUSG00000052748	344.34	-0.197047	0.179981	-1.09483	0.273593	0.979082
ENSMUSG00000053286	1231.14	-0.151682	0.158887	-0.954651	0.339754	0.988037
ENSMUSG00000106406	2.97168	-0.620875	1.40061	-0.443291	0.657556	NA
ENSMUSG00000103928	173.06	0.22777	0.189969	1.19899	0.230532	0.965204
ENSMUSG00000026484	1398.62	-0.110263	0.120177	-0.91751	0.358875	0.988037
ENSMUSG00000103238	7.57259	-0.0282335	0.735399	-0.0383921	0.969375	NA
ENSMUSG00000100981	0.175346	-0.0320981	4.08046	-0.00786631	0.993724	NA
ENSMUSG00000100551	1.27819	2.29737	2.15424	1.06644	0.286224	NA
ENSMUSG00000026483	723.995	0.062384	0.256707	0.243016	0.807993	0.997744
ENSMUSG00000100594	17.0103	0.593588	0.588515	1.00862	0.313157	NA
ENSMUSG00000043019	1497.41	-0.315092	0.154108	-2.04461	0.0408931	0.782884
ENSMUSG00000032666	469.637	0.101638	0.173156	0.586976	0.55722	0.997241
ENSMUSG00000084557	0.103043	-0.993852	4.08046	-0.243564	0.807569	NA
ENSMUSG00000014980	413.179	-0.0207778	0.131545	-0.157951	0.874495	0.997964
ENSMUSG00000032649	19.2437	0.36513	0.558534	0.653729	0.513286	NA
ENSMUSG00000026482	746.809	0.310553	0.217465	1.42806	0.153275	0.931739
ENSMUSG00000086145	0.10007	0.929694	4.08046	0.227841	0.81977	NA
ENSMUSG00000080950	0.4225	-0.0320782	3.42141	-0.00937573	0.992519	NA
ENSMUSG00000055547	0.586415	0.719133	3.5736	0.201235	0.840515	NA
ENSMUSG00000008475	5273.37	-0.0870822	0.096258	-0.904675	0.365638	0.989324
ENSMUSG00000026480	1169	0.356258	0.171028	2.08303	0.0372481	0.765662
ENSMUSG00000042772	2398.76	-0.0545655	0.0822363	-0.663521	0.506997	0.997241
ENSMUSG00000100394	5.83738	0.258227	0.807704	0.319705	0.749192	NA
ENSMUSG00000042751	178.49	-0.0842766	0.355456	-0.237095	0.812583	0.997744
ENSMUSG00000099969	0.196144	1.8715	4.03383	0.463951	0.642682	NA
ENSMUSG00000026479	10929.9	-0.30502	0.270214	-1.12881	0.258979	0.978997
ENSMUSG00000026478	12444.8	0.186283	0.141465	1.31682	0.1879	0.944376
ENSMUSG00000103818	9.1198	-0.764685	0.938071	-0.815167	0.414977	NA
ENSMUSG00000079138	6.75993	-0.285891	0.857883	-0.333252	0.738944	NA
ENSMUSG00000073538	28.8436	-0.183579	0.459663	-0.399378	0.689614	NA
ENSMUSG00000042708	20.0628	0.459352	0.519714	0.883855	0.376775	NA
ENSMUSG00000064435	0.586865	-0.0320813	3.21	-0.00999418	0.992026	NA
ENSMUSG00000103543	5.04369	0.494138	1.0724	0.460776	0.644959	NA
ENSMUSG00000042699	6160.57	0.16027	0.0829678	1.93171	0.0533951	0.820103
ENSMUSG00000042684	160.396	0.457188	0.336251	1.35966	0.173937	0.940274
ENSMUSG00000099858	3.18913	-0.406	1.23691	-0.328238	0.742732	NA
ENSMUSG00000042671	9.43694	0.0950819	1.18994	0.079905	0.936313	NA
ENSMUSG00000100334	0.63746	-0.0320907	2.99008	-0.0107324	0.991437	NA
ENSMUSG00000026475	337.495	0.0125891	0.311574	0.0404047	0.96777	0.998877
ENSMUSG00000099568	1.44173	-1.00804	1.99852	-0.504393	0.613985	NA
ENSMUSG00000066800	528.142	0.110183	0.154516	0.713086	0.475793	0.997241
ENSMUSG00000100183	6.62768	-0.655026	0.870264	-0.752675	0.451645	NA
ENSMUSG00000042641	3.0544	-0.422868	1.59892	-0.26447	0.791418	NA
ENSMUSG00000045968	4.13378	0.27865	0.940678	0.296223	0.76706	NA
ENSMUSG00000102459	0.290939	1.79127	4.04097	0.443278	0.657565	NA
ENSMUSG00000026473	1815.39	0.0576839	0.131271	0.439426	0.660353	0.997241
ENSMUSG00000101903	0.5277	-0.0407744	3.68998	-0.01105	0.991184	NA
ENSMUSG00000100502	0.103043	-0.993852	4.08046	-0.243564	0.807569	NA
ENSMUSG00000100627	1.00142	-2.78698	3.78877	-0.735589	0.461981	NA
ENSMUSG00000066797	0.496304	0.609698	3.94512	0.154545	0.87718	NA
ENSMUSG00000004110	8.61046	0.561882	1.44169	0.389737	0.696731	NA
ENSMUSG00000101880	0.719459	2.84367	2.57771	1.10317	0.269952	NA
ENSMUSG00000096950	14.0834	0.464348	0.713522	0.650782	0.515187	NA
ENSMUSG00000056708	1679.97	0.122983	0.117059	1.0506	0.293441	0.982184
ENSMUSG00000026471	467.106	0.390456	0.177039	2.20548	0.0274201	0.706724
ENSMUSG00000026470	1636.09	-0.018215	0.117273	-0.155322	0.876568	0.997964
ENSMUSG00000104181	6.38611	-0.609951	0.887182	-0.687515	0.491758	NA
ENSMUSG00000033722	90.8157	0.173896	0.482853	0.360143	0.71874	NA
ENSMUSG00000103670	0.593175	0.929684	3.60631	0.257794	0.796566	NA
ENSMUSG00000026469	1668.62	-0.138003	0.182249	-0.757226	0.448915	0.997241
ENSMUSG00000093286	0.554956	2.12515	3.54073	0.6002	0.548373	NA
ENSMUSG00000073535	5.86123	0.734533	0.798794	0.919551	0.357807	NA
ENSMUSG00000033701	1318.59	0.0485597	0.116503	0.416812	0.676816	0.997241
ENSMUSG00000026468	2.17327	-1.25894	1.53709	-0.819041	0.412763	NA
ENSMUSG00000103180	0.635016	3.31132	3.95407	0.837445	0.402343	NA
ENSMUSG00000033684	4661.03	0.161748	0.132892	1.21714	0.223553	0.961605
ENSMUSG00000102299	1.03914	-1.53457	2.90795	-0.527716	0.597697	NA
ENSMUSG00000102558	0.853838	-0.142578	2.59304	-0.0549849	0.956151	NA
ENSMUSG00000033671	1691.51	-0.222613	0.170299	-1.30719	0.191147	0.949011
ENSMUSG00000103717	2.12929	-3.67491	2.19851	-1.67155	0.0946136	NA
ENSMUSG00000103771	1.58845	-0.393235	2.04024	-0.19274	0.847163	NA
ENSMUSG00000102837	0.681678	0.665572	3.47625	0.191463	0.848163	NA
ENSMUSG00000077419	0.214503	-0.0320994	4.08046	-0.00786662	0.993723	NA
ENSMUSG00000102833	2.19712	-1.44914	2.0354	-0.711966	0.476486	NA
ENSMUSG00000026466	2650.4	-0.0621372	0.118895	-0.522622	0.601237	0.997241
ENSMUSG00000102964	30.2793	-0.186506	0.48853	-0.38177	0.702632	NA
ENSMUSG00000050565	3484.29	-0.12658	0.0883829	-1.43218	0.152092	0.931282
ENSMUSG00000015484	0.299136	-2.51521	3.99226	-0.630021	0.528681	NA
ENSMUSG00000060985	1.3629	1.25756	2.34847	0.535481	0.592317	NA
ENSMUSG00000026602	5.63057	-1.20337	0.931002	-1.29255	0.196166	NA
ENSMUSG00000026601	26.1446	0.307041	0.485648	0.632229	0.527237	NA
ENSMUSG00000078193	764.898	0.0808228	0.124709	0.648092	0.516925	0.997241
ENSMUSG00000026600	3325.75	0.0171511	0.125913	0.136214	0.891652	0.997964
ENSMUSG00000103199	8.83569	-0.543267	1.0205	-0.532355	0.59448	NA
ENSMUSG00000101523	158.356	-0.0374971	0.269216	-0.139282	0.889227	0.997964
ENSMUSG00000026596	2480.7	-0.0381393	0.111521	-0.341993	0.732356	0.997241
ENSMUSG00000104293	12.2675	-0.830722	0.633093	-1.31216	0.189465	NA
ENSMUSG00000060519	1613.93	-0.126326	0.182592	-0.691853	0.48903	0.997241
ENSMUSG00000033557	1670.53	-0.299006	0.131107	-2.28063	0.0225704	0.651739
ENSMUSG00000046057	4.47121	0.11606	1.0225	0.113505	0.90963	NA
ENSMUSG00000026594	554.122	-0.152173	0.34373	-0.442712	0.657974	0.997241
ENSMUSG00000101964	1.10493	0.302858	2.35841	0.128416	0.89782	NA
ENSMUSG00000033544	25.5039	0.970067	0.603426	1.6076	0.107923	NA
ENSMUSG00000103303	0.330622	-0.0321043	4.08046	-0.00786782	0.993722	NA
ENSMUSG00000102960	1.3103	1.78449	2.40039	0.743418	0.457229	NA
ENSMUSG00000101905	0.859944	0.645356	2.06531	0.312474	0.75468	NA
ENSMUSG00000101768	0.210294	-0.993858	4.08046	-0.243565	0.807567	NA
ENSMUSG00000103325	1.63958	0.37292	2.41614	0.154345	0.877337	NA
ENSMUSG00000026592	0.206975	0.929688	4.08046	0.227839	0.819771	NA
ENSMUSG00000109913	0.636688	-3.2985	3.95667	-0.833655	0.404475	NA
ENSMUSG00000070565	542.747	-0.164457	0.23159	-0.71012	0.477629	0.997241
ENSMUSG00000102326	0.538262	0.929682	3.74427	0.248295	0.803906	NA
ENSMUSG00000102391	0.0876728	-0.0320929	4.08046	-0.00786503	0.993725	NA
ENSMUSG00000087632	0.484174	-0.839425	3.27437	-0.256362	0.797671	NA
ENSMUSG00000103808	0.814283	-1.58482	2.62133	-0.604587	0.545453	NA
ENSMUSG00000049881	528.421	0.228672	0.147422	1.55114	0.120868	0.908999
ENSMUSG00000033488	44.3349	0.564156	0.337954	1.66933	0.0950527	NA
ENSMUSG00000087093	0.515213	-3.29849	3.95667	-0.833654	0.404476	NA
ENSMUSG00000026589	85.1439	0.352822	0.515155	0.684885	0.493417	NA
ENSMUSG00000004031	0.950903	1.89602	3.86518	0.49054	0.623752	NA
ENSMUSG00000026587	1.00497	1.46877	3.31456	0.443126	0.657675	NA
ENSMUSG00000073530	49.1177	0.0284341	0.575981	0.0493664	0.960627	NA
ENSMUSG00000040782	1648.38	-0.143853	0.128924	-1.1158	0.264506	0.978997
ENSMUSG00000103572	4.50499	-0.0140248	0.996328	-0.0140765	0.988769	NA
ENSMUSG00000103186	3.5406	1.87211	1.32174	1.4164	0.156658	NA
ENSMUSG00000089536	0.681949	3.13464	2.84866	1.10039	0.271161	NA
ENSMUSG00000105399	0.096074	0.929694	4.08046	0.227841	0.81977	NA
ENSMUSG00000103289	0.217549	0.929688	4.08046	0.227839	0.819771	NA
ENSMUSG00000015829	92.0029	-0.30457	1.05055	-0.289916	0.771881	NA
ENSMUSG00000073528	0.106905	-0.0320929	4.08046	-0.00786503	0.993725	NA
ENSMUSG00000104111	0.485998	0.132871	3.7734	0.0352125	0.97191	NA
ENSMUSG00000090394	615.487	0.0534322	0.206761	0.258425	0.796079	0.997744
ENSMUSG00000026729	1.22328	0.235808	1.73012	0.136296	0.891588	NA
ENSMUSG00000026725	516.208	0.912594	0.887411	1.02838	0.303772	0.984056
ENSMUSG00000058267	785.647	0.199911	0.130771	1.52871	0.126337	0.91217
ENSMUSG00000014226	2164.57	-0.105772	0.126107	-0.838747	0.401612	0.994239
ENSMUSG00000103006	11.2906	-0.162093	0.603466	-0.268603	0.788235	NA
ENSMUSG00000026721	769.268	0.00518362	0.174038	0.0297844	0.976239	0.998877
ENSMUSG00000104302	2.09986	-0.545415	1.60793	-0.339204	0.734456	NA
ENSMUSG00000103522	1.44134	-2.41343	2.76258	-0.873612	0.38233	NA
ENSMUSG00000103693	3.97641	0.27753	1.15307	0.240687	0.809798	NA
ENSMUSG00000104026	2.92364	-0.235151	1.56035	-0.150704	0.880209	NA
ENSMUSG00000118401	4.31687	-0.844021	1.1844	-0.712615	0.476084	NA
ENSMUSG00000104020	1.35257	-2.87909	1.93861	-1.48513	0.137508	NA
ENSMUSG00000103391	1.73101	-0.971484	1.49078	-0.651663	0.514618	NA
ENSMUSG00000103432	4.41506	-1.25139	1.12586	-1.1115	0.266353	NA
ENSMUSG00000102172	0.793412	1.51284	2.63213	0.574757	0.565456	NA
ENSMUSG00000103200	1.96805	0.442586	1.38074	0.320542	0.748557	NA
ENSMUSG00000103632	11.4562	0.614915	0.596952	1.03009	0.302967	NA
ENSMUSG00000104053	3.0964	-0.58744	1.81003	-0.324547	0.745524	NA
ENSMUSG00000102852	0.58723	-1.46011	2.73194	-0.53446	0.593023	NA
ENSMUSG00000103631	0.196093	-1.90747	4.03632	-0.472577	0.636515	NA
ENSMUSG00000040423	2063.12	-0.191977	0.144597	-1.32767	0.184286	0.943621
ENSMUSG00000103343	6.05138	-0.531823	1.03977	-0.51148	0.609015	NA
ENSMUSG00000103846	2.74623	-0.642399	1.33176	-0.482368	0.629545	NA
ENSMUSG00000103739	13.9889	0.12474	0.552176	0.225906	0.821274	NA
ENSMUSG00000026715	4.91423	-0.13879	1.27941	-0.10848	0.913615	NA
ENSMUSG00000103222	0.281624	0.883919	4.03608	0.219004	0.826647	NA
ENSMUSG00000103680	1.66465	-0.0474138	2.04189	-0.0232205	0.981474	NA
ENSMUSG00000043467	605.563	0.198135	0.17157	1.15483	0.248159	0.975668
ENSMUSG00000104016	4.45298	1.06989	1.048	1.02089	0.307305	NA
ENSMUSG00000053332	3683.58	0.239097	0.216584	1.10395	0.269616	0.978997
ENSMUSG00000026709	327.791	0.472513	0.128121	3.68802	0.000226004	0.1435
ENSMUSG00000026708	280.212	0.251404	0.231234	1.08723	0.276936	0.979082
ENSMUSG00000026705	677.23	-0.21301	0.101011	-2.10877	0.0349644	0.752558
ENSMUSG00000044835	0.516735	1.4853	3.14824	0.471786	0.637079	NA
ENSMUSG00000102817	5.43964	-1.50748	1.01637	-1.48321	0.13802	NA
ENSMUSG00000026701	4800.71	0.18222	0.106425	1.71218	0.0868626	0.868387
ENSMUSG00000026700	8.44952	0.307152	0.736898	0.416817	0.676812	NA
ENSMUSG00000066755	6.13345	-0.281442	0.830063	-0.339061	0.734564	NA
ENSMUSG00000040323	177.928	0.0668988	0.175952	0.38021	0.70379	0.997241
ENSMUSG00000102399	4.61783	1.01763	1.37733	0.738844	0.460002	NA
ENSMUSG00000000817	14.6441	-1.03986	0.72224	-1.43977	0.149932	NA
ENSMUSG00000103625	3.5286	2.11454	1.15781	1.82633	0.0678001	NA
ENSMUSG00000040297	1581.42	-0.153293	0.107867	-1.42113	0.155278	0.932563
ENSMUSG00000102254	2.59844	-0.293326	1.23579	-0.23736	0.812378	NA
ENSMUSG00000086277	0.107252	-0.0320929	4.08046	-0.00786503	0.993725	NA
ENSMUSG00000026698	406.247	0.0649897	0.120149	0.540909	0.58857	0.997241
ENSMUSG00000103393	0.096074	0.929694	4.08046	0.227841	0.81977	NA
ENSMUSG00000040265	33.7599	0.171386	0.486507	0.352278	0.72463	NA
ENSMUSG00000078190	37.9162	-0.0132098	0.541879	-0.0243778	0.980551	NA
ENSMUSG00000026694	627.826	-0.158051	0.14332	-1.10278	0.270123	0.978997
ENSMUSG00000026696	734.455	0.0345591	0.11079	0.311934	0.755091	0.997241
ENSMUSG00000026697	13.8216	-0.442454	0.702606	-0.629733	0.528869	NA
ENSMUSG00000040225	7815.83	0.0208858	0.136971	0.152483	0.878806	0.997964
ENSMUSG00000098259	6.70073	1.29738	0.994427	1.30465	0.192011	NA
ENSMUSG00000026692	0.835831	-1.42096	2.97152	-0.478191	0.632514	NA
ENSMUSG00000040181	20.2648	0.157643	0.511547	0.308169	0.757954	NA
ENSMUSG00000040170	278.935	-0.181701	0.705909	-0.2574	0.79687	0.997744
ENSMUSG00000095576	0.93532	0.330195	2.45332	0.134591	0.892935	NA
ENSMUSG00000026691	1.72352	-0.7192	1.841	-0.390657	0.696051	NA
ENSMUSG00000026586	853.568	0.0175331	0.495287	0.0353998	0.971761	0.998877
ENSMUSG00000092188	49.3816	0.0743324	0.383575	0.193788	0.846342	NA
ENSMUSG00000103195	10.6825	0.265037	0.699292	0.379008	0.704682	NA
ENSMUSG00000040124	1266.94	0.21432	0.209376	1.02361	0.30602	0.984056
ENSMUSG00000088951	3.24466	0.538968	1.26475	0.426144	0.670003	NA
ENSMUSG00000101869	0.0879607	0.929694	4.08046	0.227841	0.81977	NA
ENSMUSG00000102117	1.42167	1.98104	2.08965	0.948025	0.343117	NA
ENSMUSG00000040113	2.46482	0.478215	1.78861	0.267367	0.789187	NA
ENSMUSG00000026585	2188.73	-0.00412178	0.168902	-0.0244033	0.980531	0.998877
ENSMUSG00000026584	603.724	0.0823102	0.139712	0.589143	0.555765	0.997241
ENSMUSG00000041406	312.343	0.296437	0.186704	1.58773	0.112346	0.907073
ENSMUSG00000041396	95.1727	-0.0216989	0.233676	-0.0928592	0.926015	NA
ENSMUSG00000026582	24.464	0.676834	0.638216	1.06051	0.288912	NA
ENSMUSG00000026581	258.188	0.395327	0.408642	0.967417	0.333336	0.988037
ENSMUSG00000026580	69.7114	0.222157	0.28859	0.769801	0.441418	NA
ENSMUSG00000090081	0.314227	0.929681	4.08046	0.227838	0.819772	NA
ENSMUSG00000086593	1.71735	-0.0555043	2.23959	-0.0247832	0.980228	NA
ENSMUSG00000026579	82.164	0.687466	0.407914	1.68532	0.0919261	NA
ENSMUSG00000040918	257.412	-0.109359	0.242841	-0.450332	0.652471	0.997241
ENSMUSG00000026578	317.049	0.172623	0.188589	0.915339	0.360014	0.988037
ENSMUSG00000026577	459.767	-0.129628	0.150992	-0.858508	0.390612	0.99383
ENSMUSG00000026575	512.311	-0.0224658	0.136633	-0.164424	0.869397	0.997964
ENSMUSG00000103493	6.45933	-0.386115	1.03688	-0.372382	0.709608	NA
ENSMUSG00000026576	707.437	-0.012362	0.46077	-0.026829	0.978596	0.998877
ENSMUSG00000104011	3.64005	3.0831	1.47986	2.08337	0.0372173	NA
ENSMUSG00000097281	0.822348	0.551812	2.59554	0.2126	0.831639	NA
ENSMUSG00000102389	0.0879607	0.929694	4.08046	0.227841	0.81977	NA
ENSMUSG00000103383	0.175346	-0.0320981	4.08046	-0.00786631	0.993724	NA
ENSMUSG00000102897	0.33091	0.929681	4.08046	0.227837	0.819773	NA
ENSMUSG00000026574	139.568	0.750624	0.443591	1.69215	0.0906169	0.876933
ENSMUSG00000103659	0.263882	2.31603	4.00053	0.578931	0.562636	NA
ENSMUSG00000104117	2.49434	0.121942	1.57281	0.0775315	0.938201	NA
ENSMUSG00000103320	0.522807	-1.85446	3.22961	-0.574206	0.565829	NA
ENSMUSG00000026573	6.26239	0.379728	1.17868	0.322163	0.747329	NA
ENSMUSG00000101189	2.86084	-0.221731	1.35535	-0.163597	0.870048	NA
ENSMUSG00000026572	0.0879607	0.929694	4.08046	0.227841	0.81977	NA
ENSMUSG00000040848	3175.37	-0.204464	0.18541	-1.10277	0.270127	0.978997
ENSMUSG00000040843	1291.61	-0.0498493	0.0931898	-0.534922	0.592704	0.997241
ENSMUSG00000102302	80.3971	0.219123	0.28335	0.773329	0.439327	NA
ENSMUSG00000040836	407.312	-0.112399	0.155998	-0.720515	0.471208	0.997241
ENSMUSG00000026571	1091.41	-0.0134326	0.127761	-0.105139	0.916266	0.998877
ENSMUSG00000104427	1.25553	3.32868	2.19881	1.51386	0.130062	NA
ENSMUSG00000089299	0.296215	2.4674	3.99129	0.618195	0.536447	NA
[truncated: 30,088 more rows]

## Sheet: WF2 Exp1
EntrezID	logFC	baseMean	lfcSE	stat	P.Value	adj.P.Val	Symbols	Name
[truncated: 14,370 more rows]

[truncated: 4 more sheets: WF2 Exp 2, WF3 Exp1-2, WF3 Exp1, WF3 Exp 2]
